# Supplementary material for: Whole genome sequencing in the Middle Eastern Qatari population identifies genetic associations with 45 clinically relevant traits
Source: PubMed Central journal article supplement (PMC7902658; doi:10.1038/s41467-021-21381-3), 2021-02-23

**Supplementary Data 5. Colocalization analysis of known loci showing nominal significance for replication.** The graphs below (N=180) show the  $-\log_{10}(p)$  obtained from GWAS analysis in QGP compared to  $-\log_{10}(P)$  obtained from GWAS analysis in BBJ. The P-value for testing the H3 and H4 hypothesis of colocalization are shown at the top of each graph. H3 tests if the locus is associated with the trait in both QGP and BBJ but the association is driven by different variants. H4 tests if the locus is associated with the trait in both QGP and BBJ but the association is driven by the same variants.

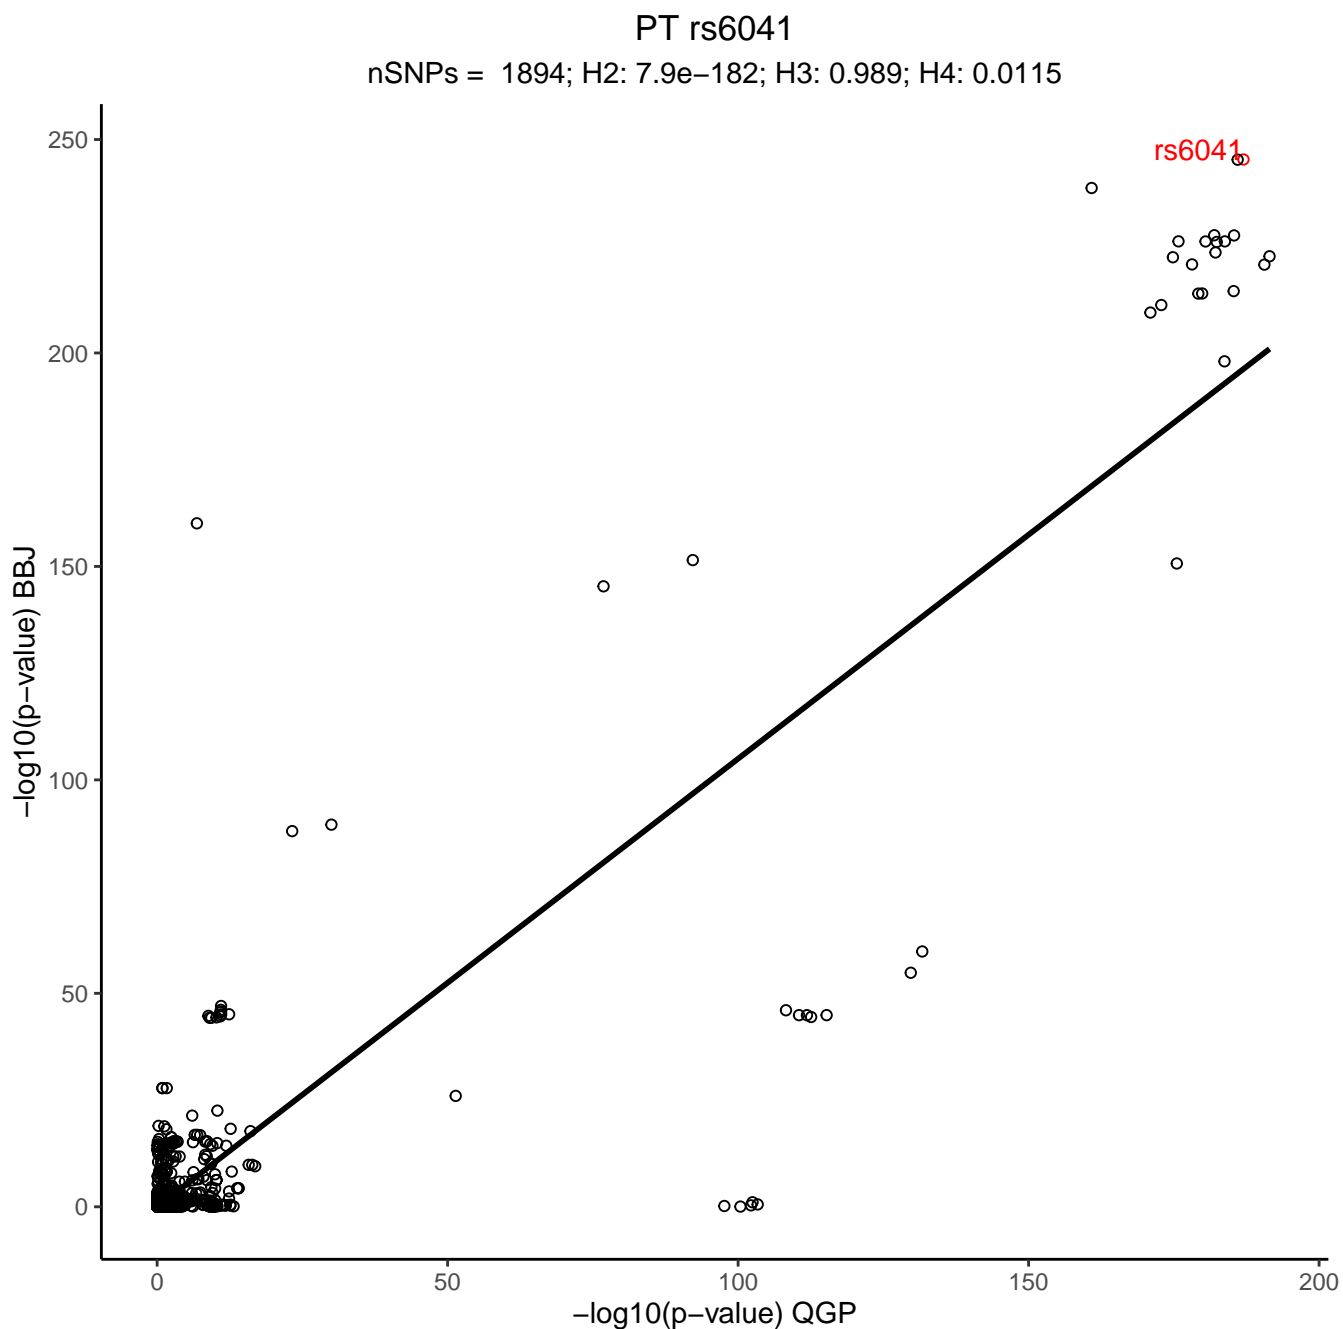

APTT rs1801020

nSNPs = 768; H2: 5.36e-135; H3: 0; H4: 1

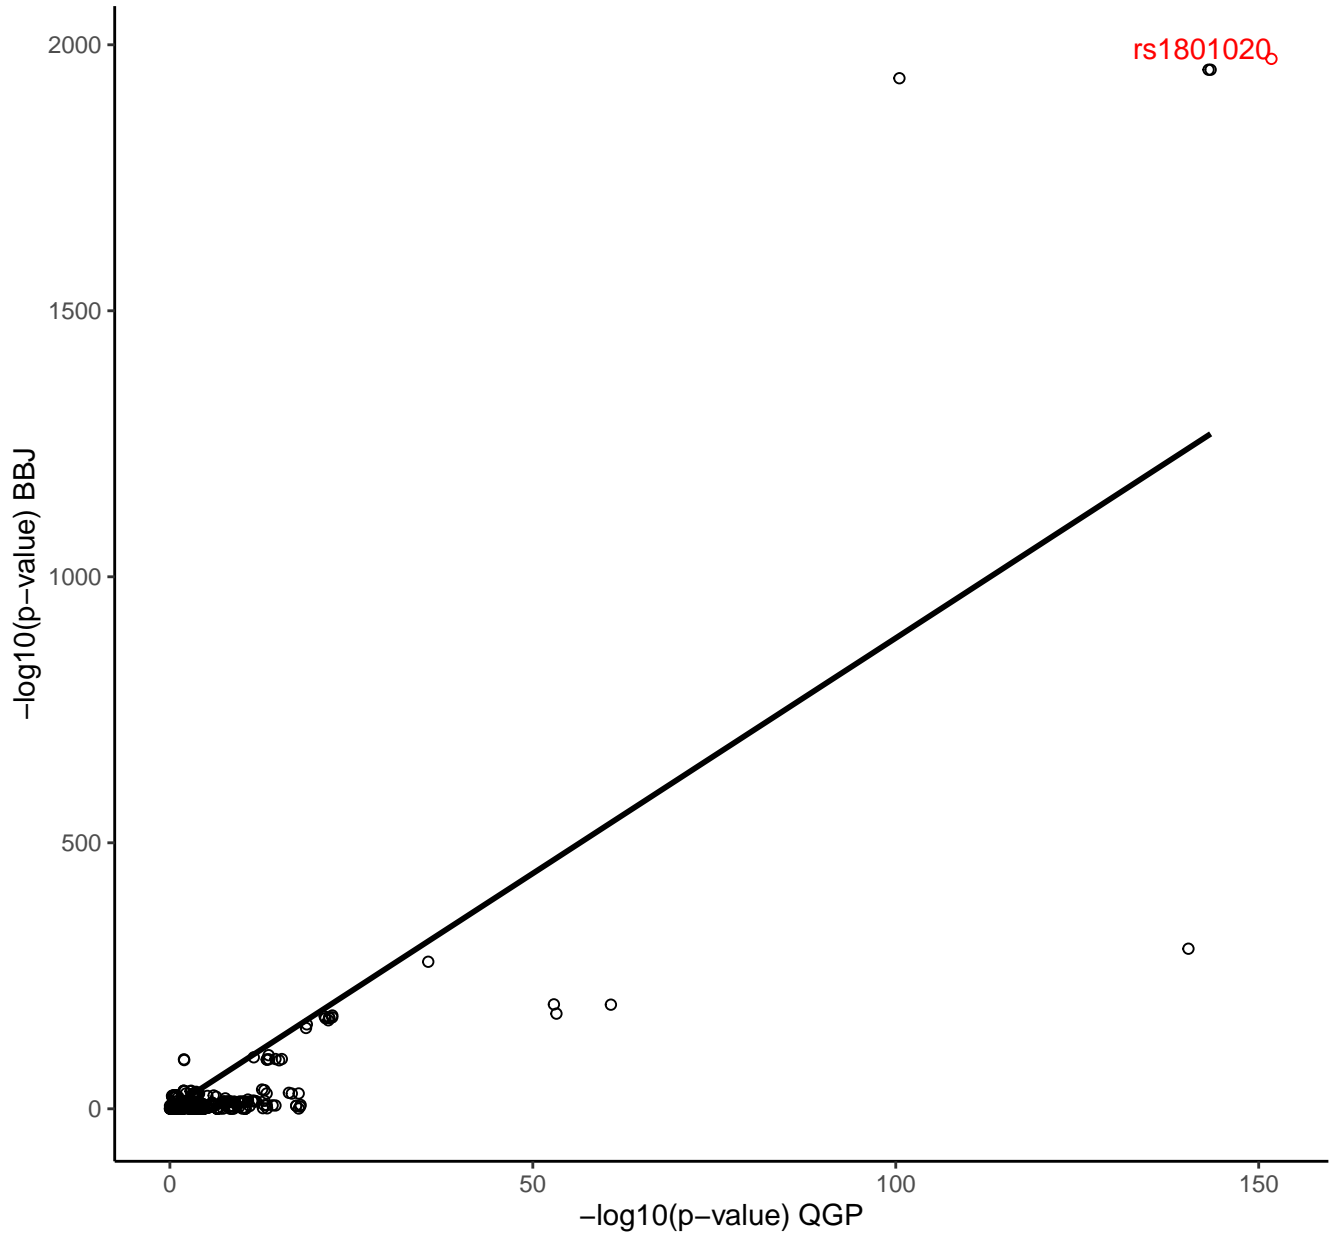

APTT rs687289

nSNPs = 1915; H2: 5.81e-60; H3: 0.0871; H4: 0.913

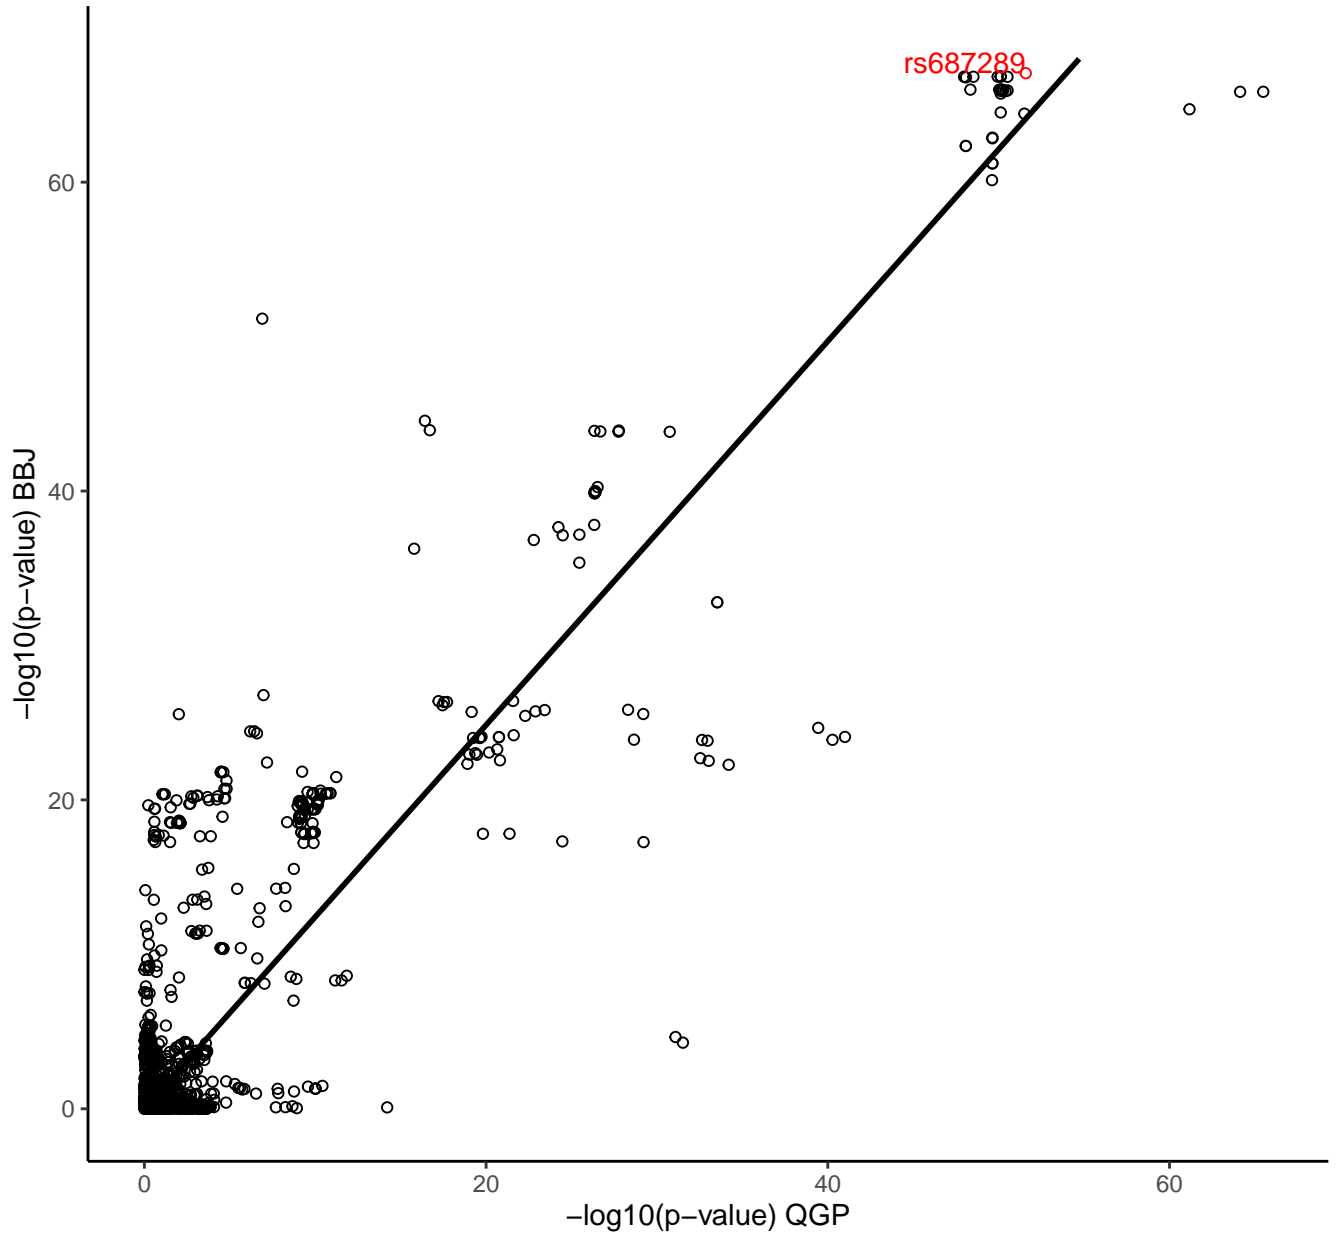

TBil rs28946889

nSNPs = 1763; H2: 5.73e-139; H3: 1; H4: 3.73e-122

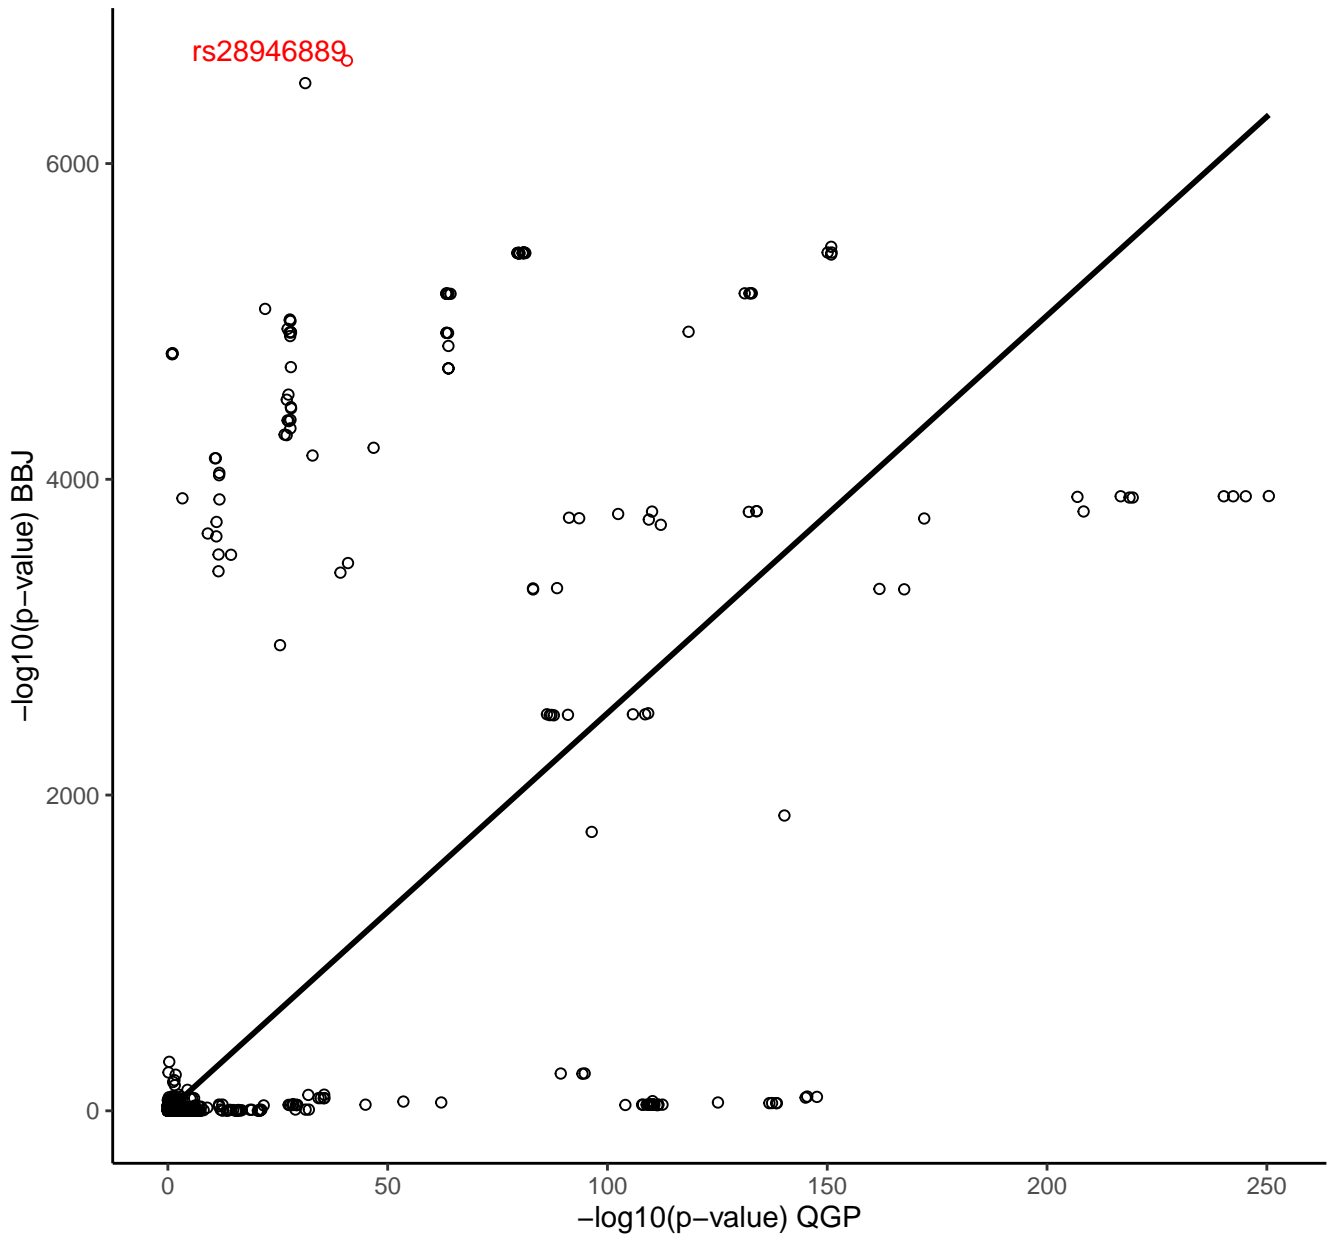

### ALP rs2519093

nSNPs = 1836; H2: 0.00103; H3: 0.999; H4: 2.07e-05

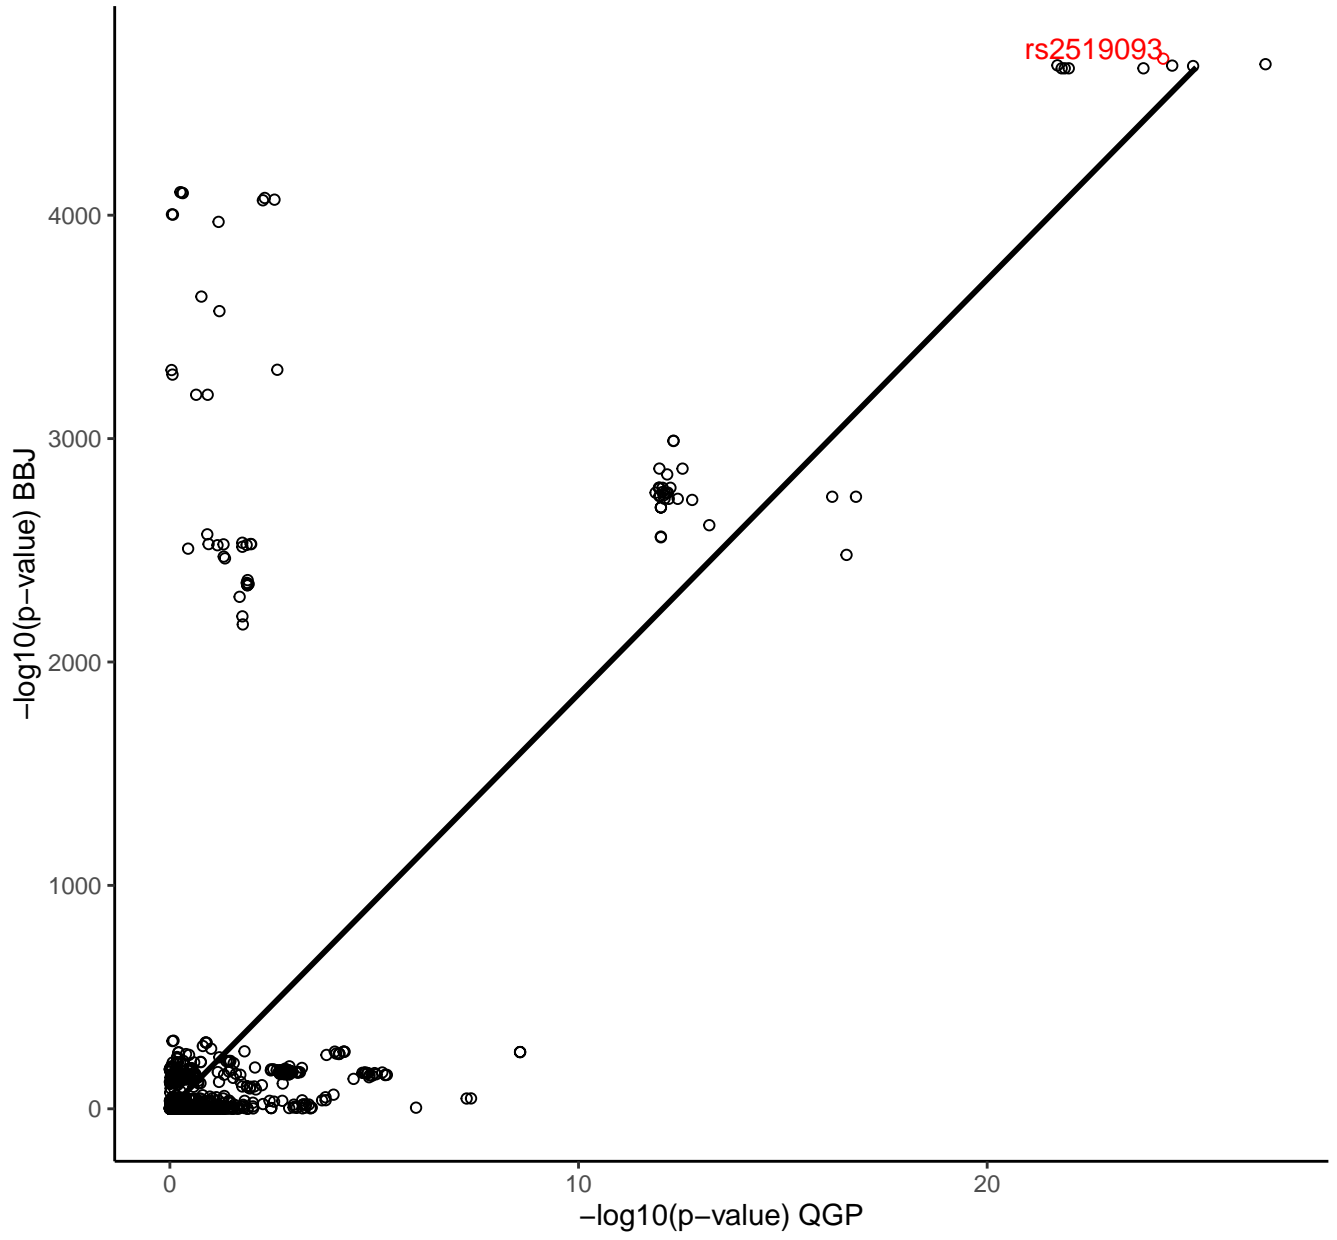

UA rs7679724

nSNPs = 1845; H2: 6.4e-35; H3: 1; H4: 7.73e-05

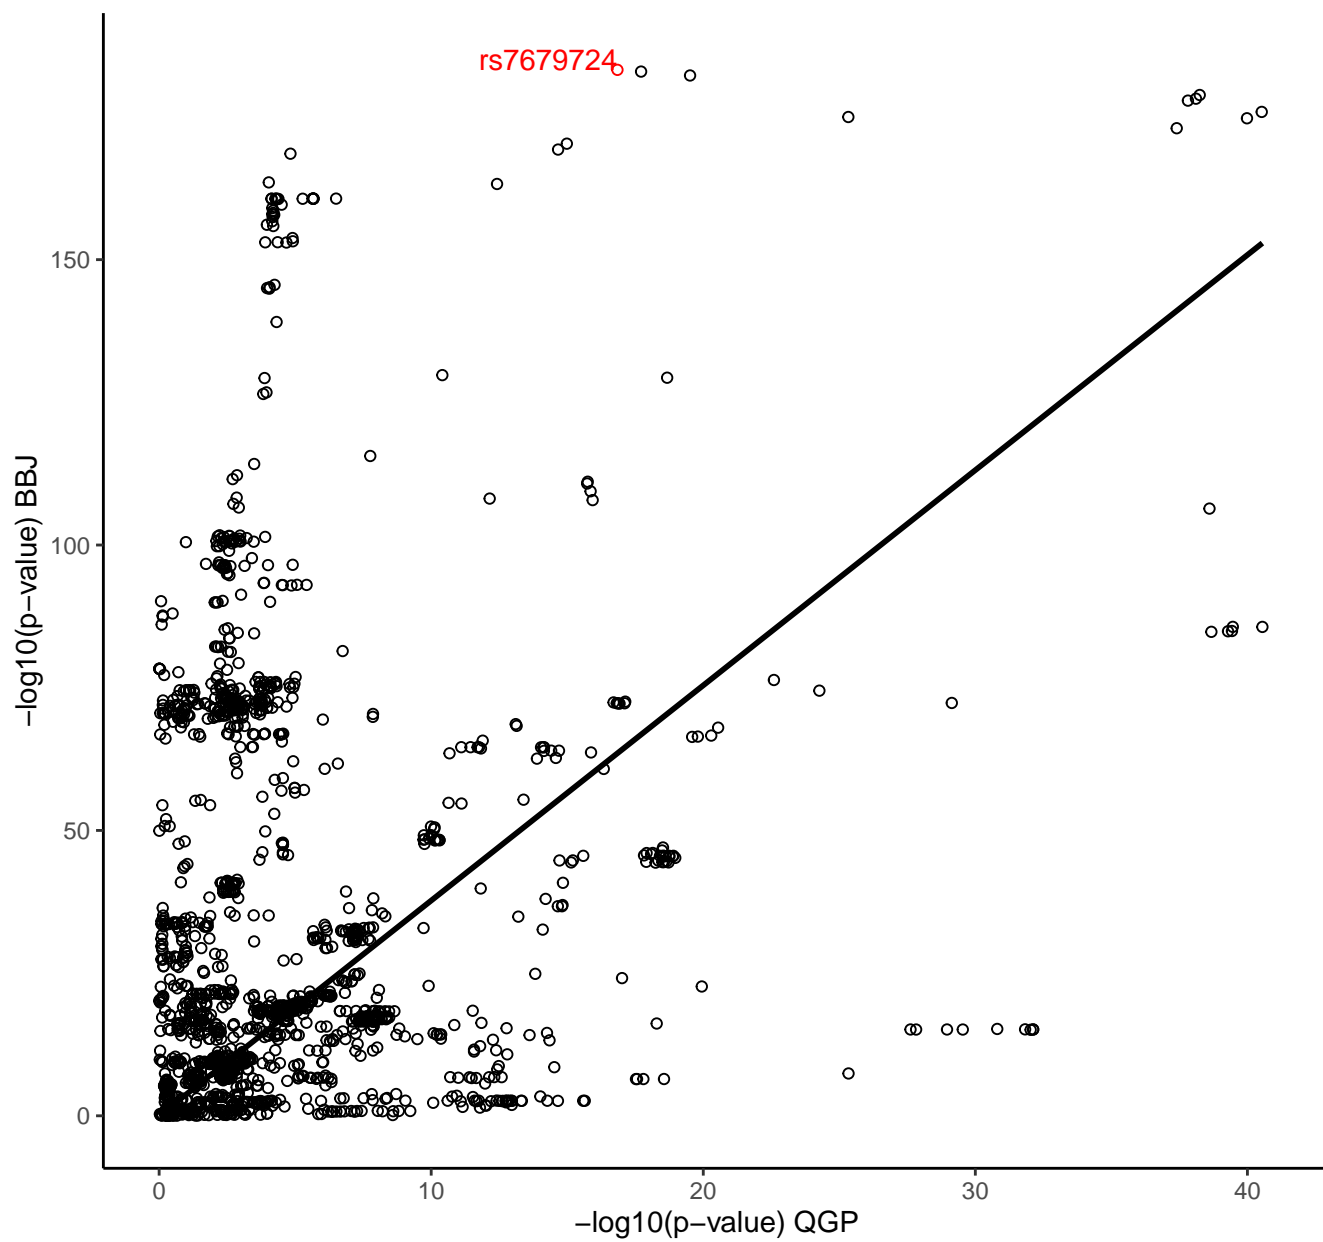

### GGT rs6004193

nSNPs = 1291; H2: 3.36e-08; H3: 6.4e-07; H4: 1

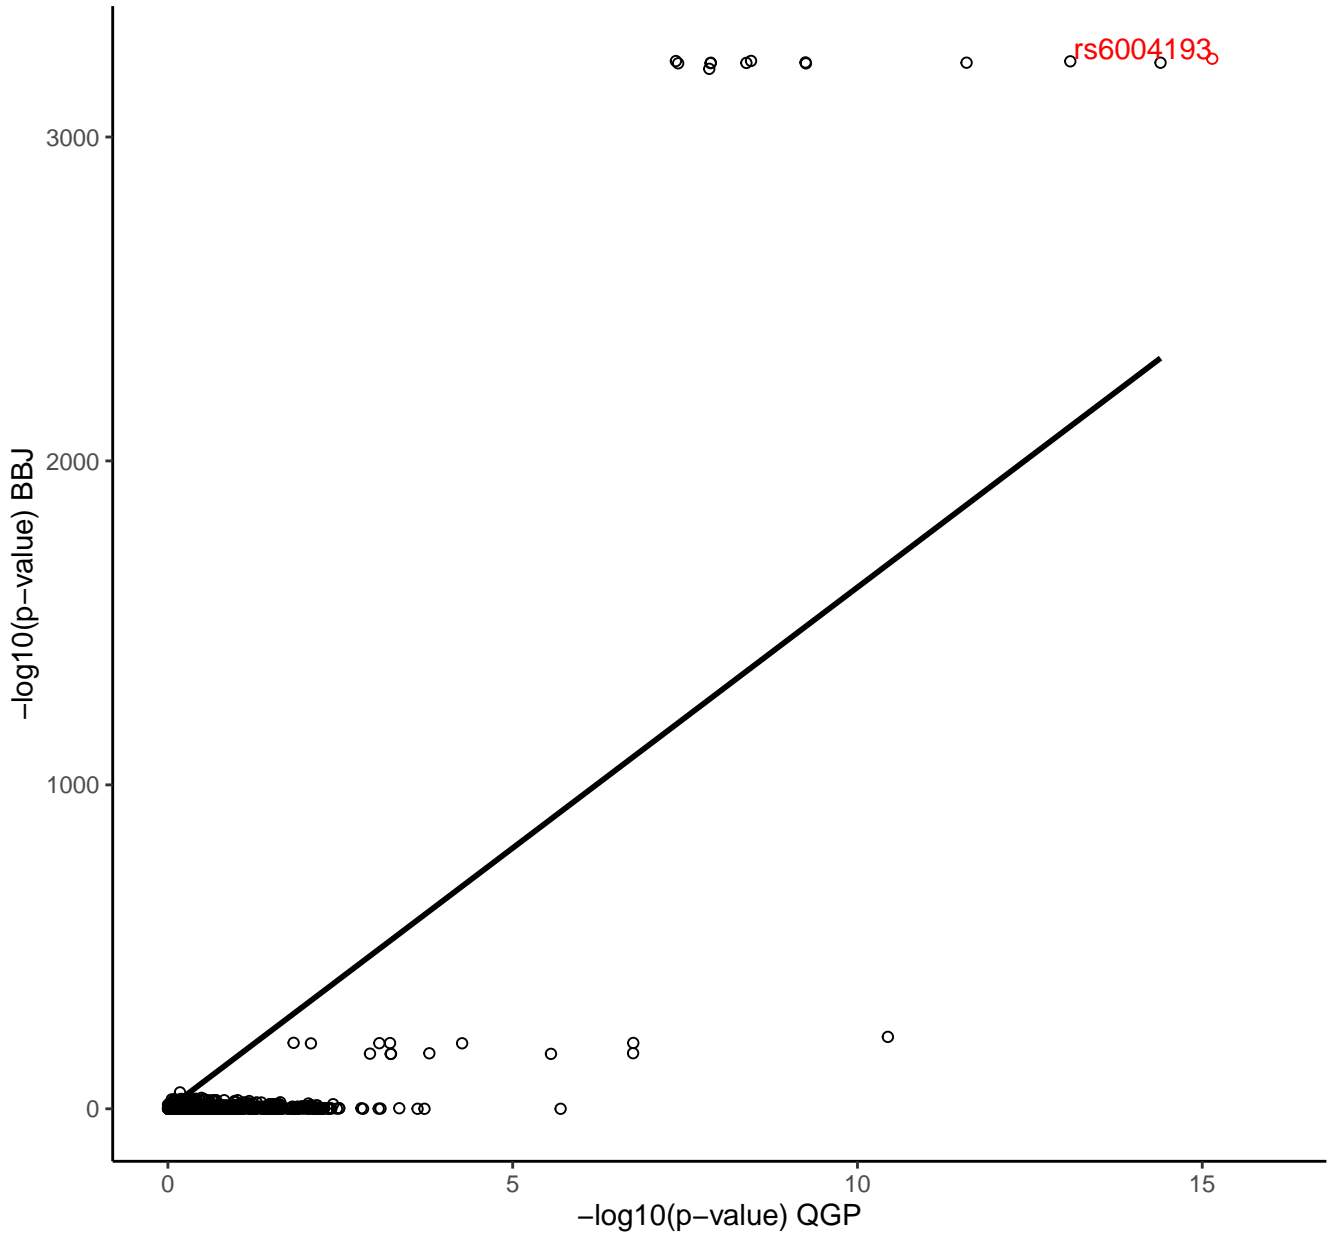

LDL-C rs660240

nSNPs = 1149; H2: 9.12e-12; H3: 0.00645; H4: 0.994

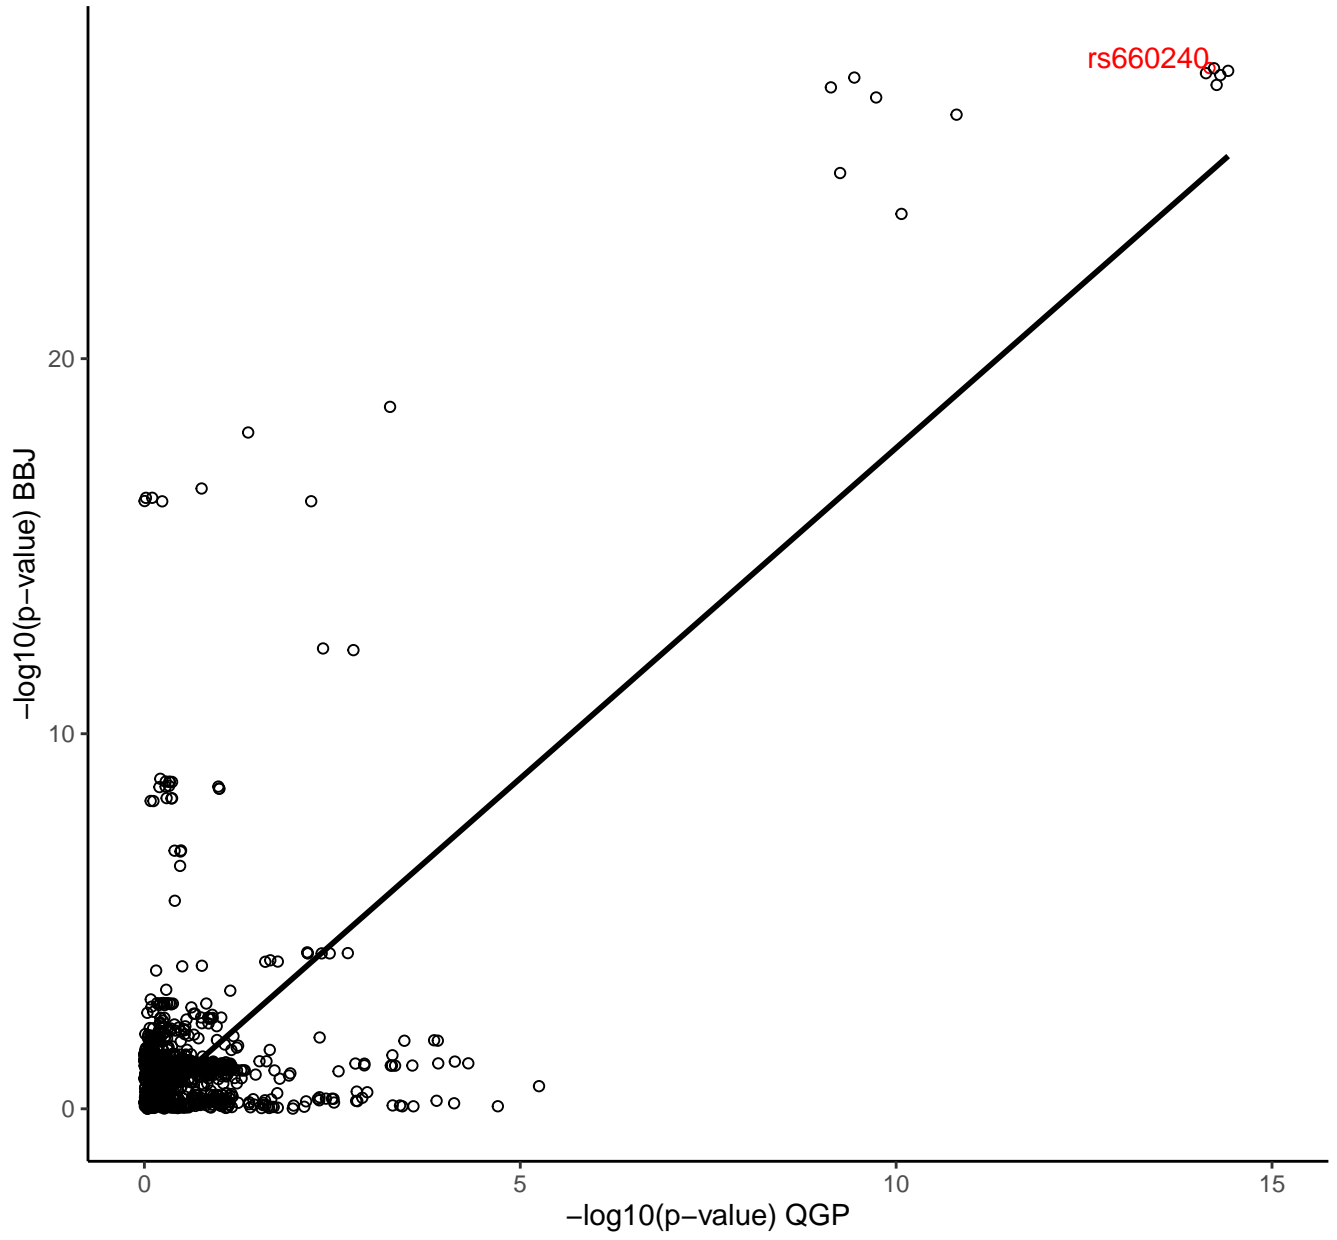



TG rs651821

nSNPs = 2409; H2: 5.14e-10; H3: 0.951; H4: 0.0491

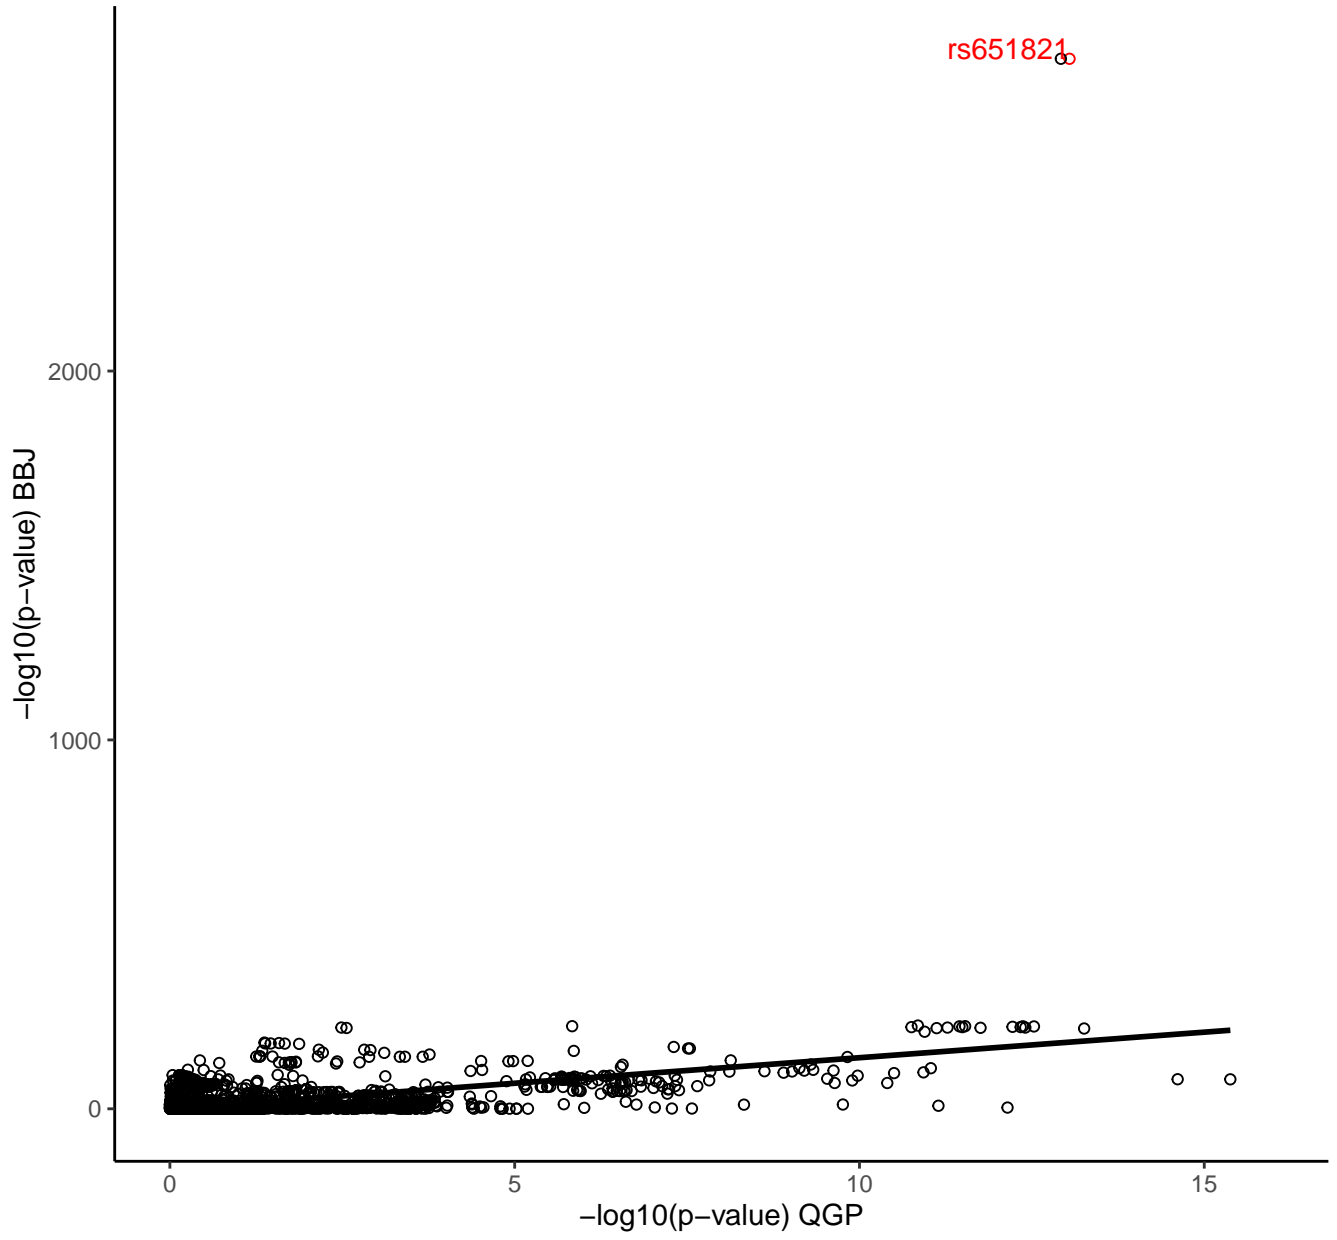

PT rs867186

nSNPs = 1267; H2: 8.78e-10; H3: 0.0978; H4: 0.902

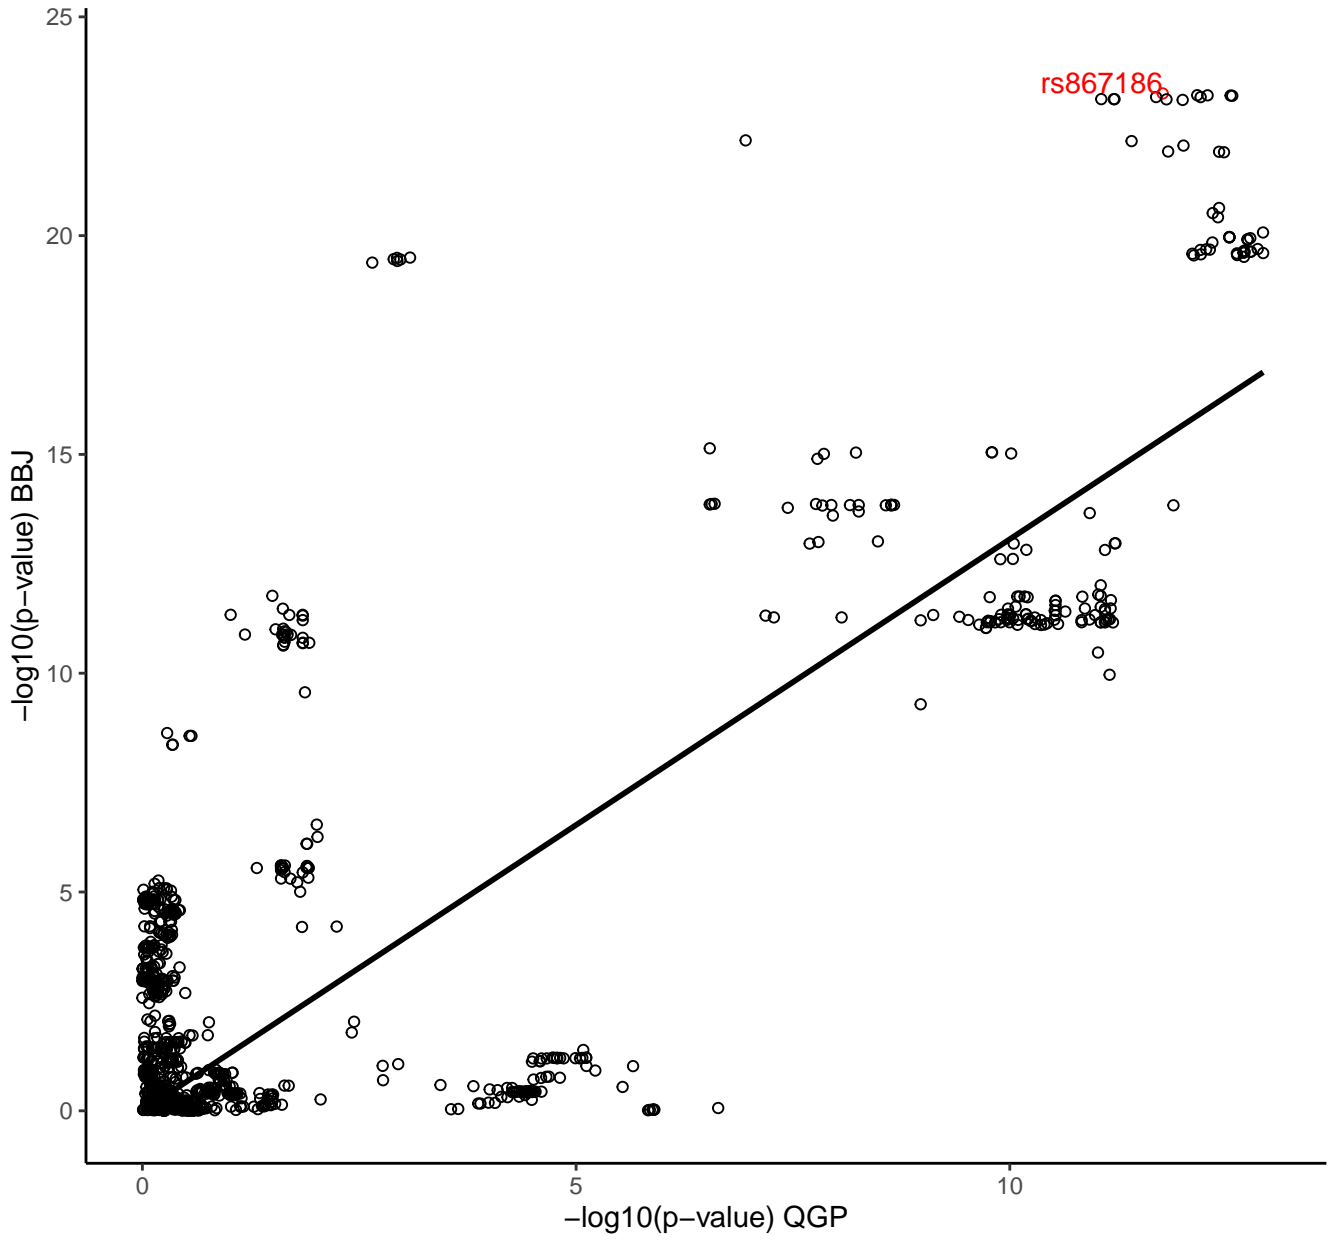

TC rs646776

nSNPs = 1152; H2: 2.09e-09; H3: 0.00666; H4: 0.993

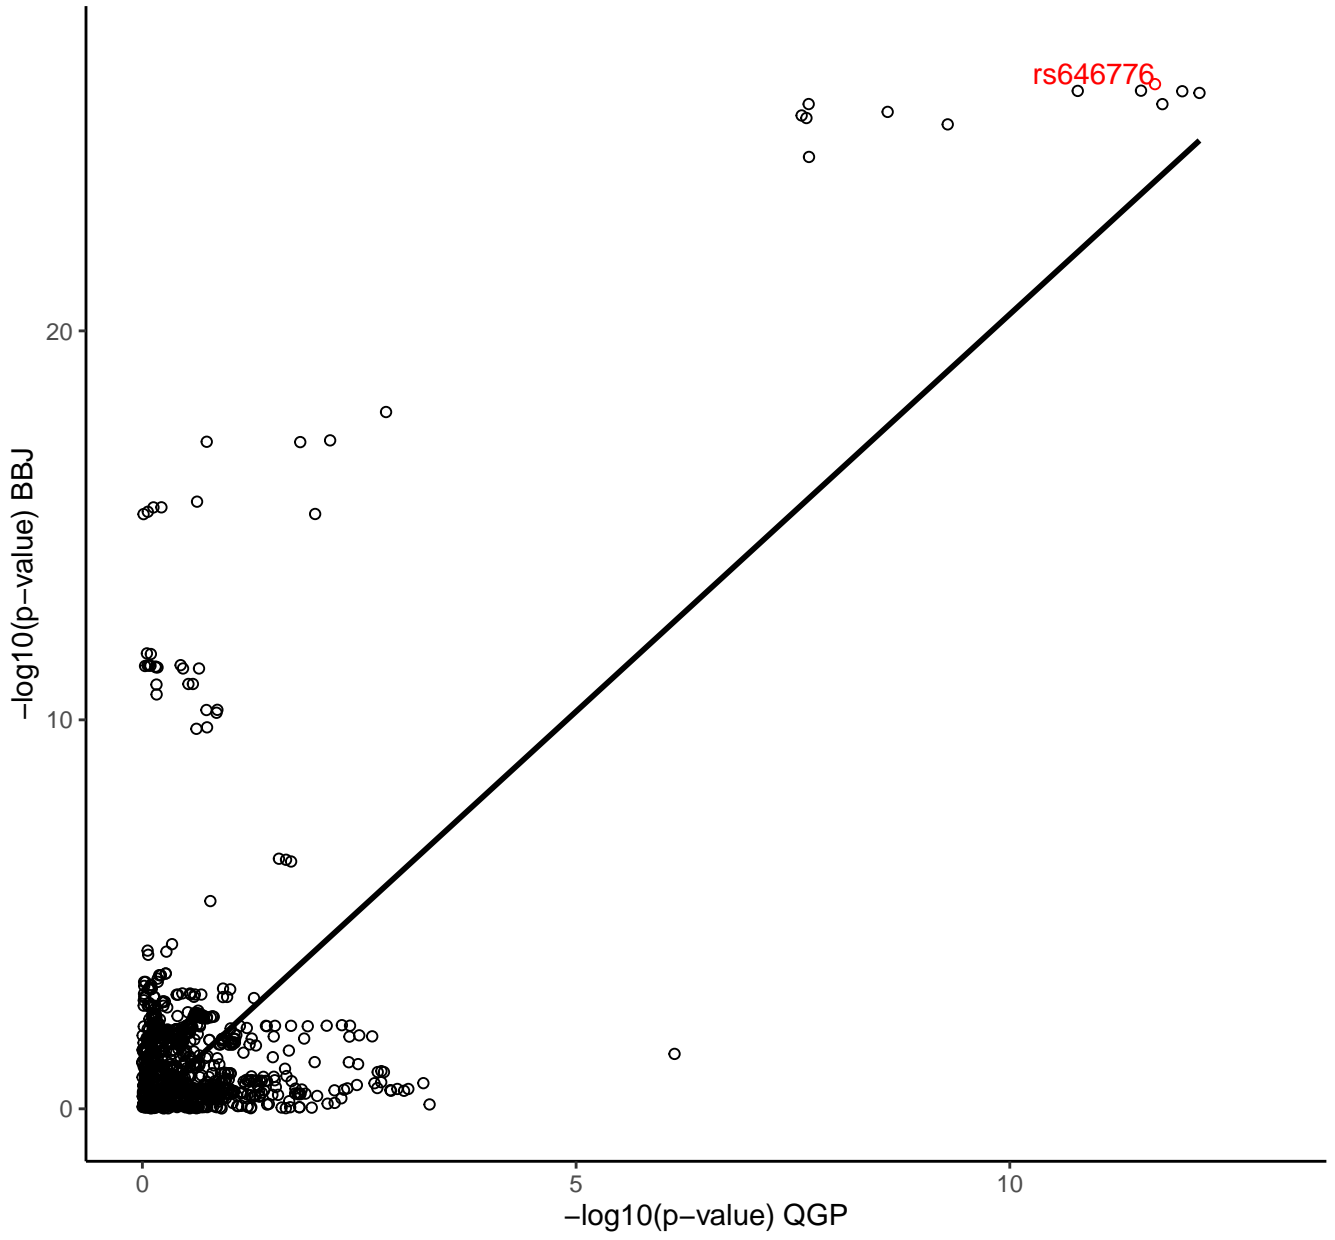

TG rs1260326

nSNPs = 708; H2: 4.27e-09; H3: 3.43e-06; H4: 1

rs1260326

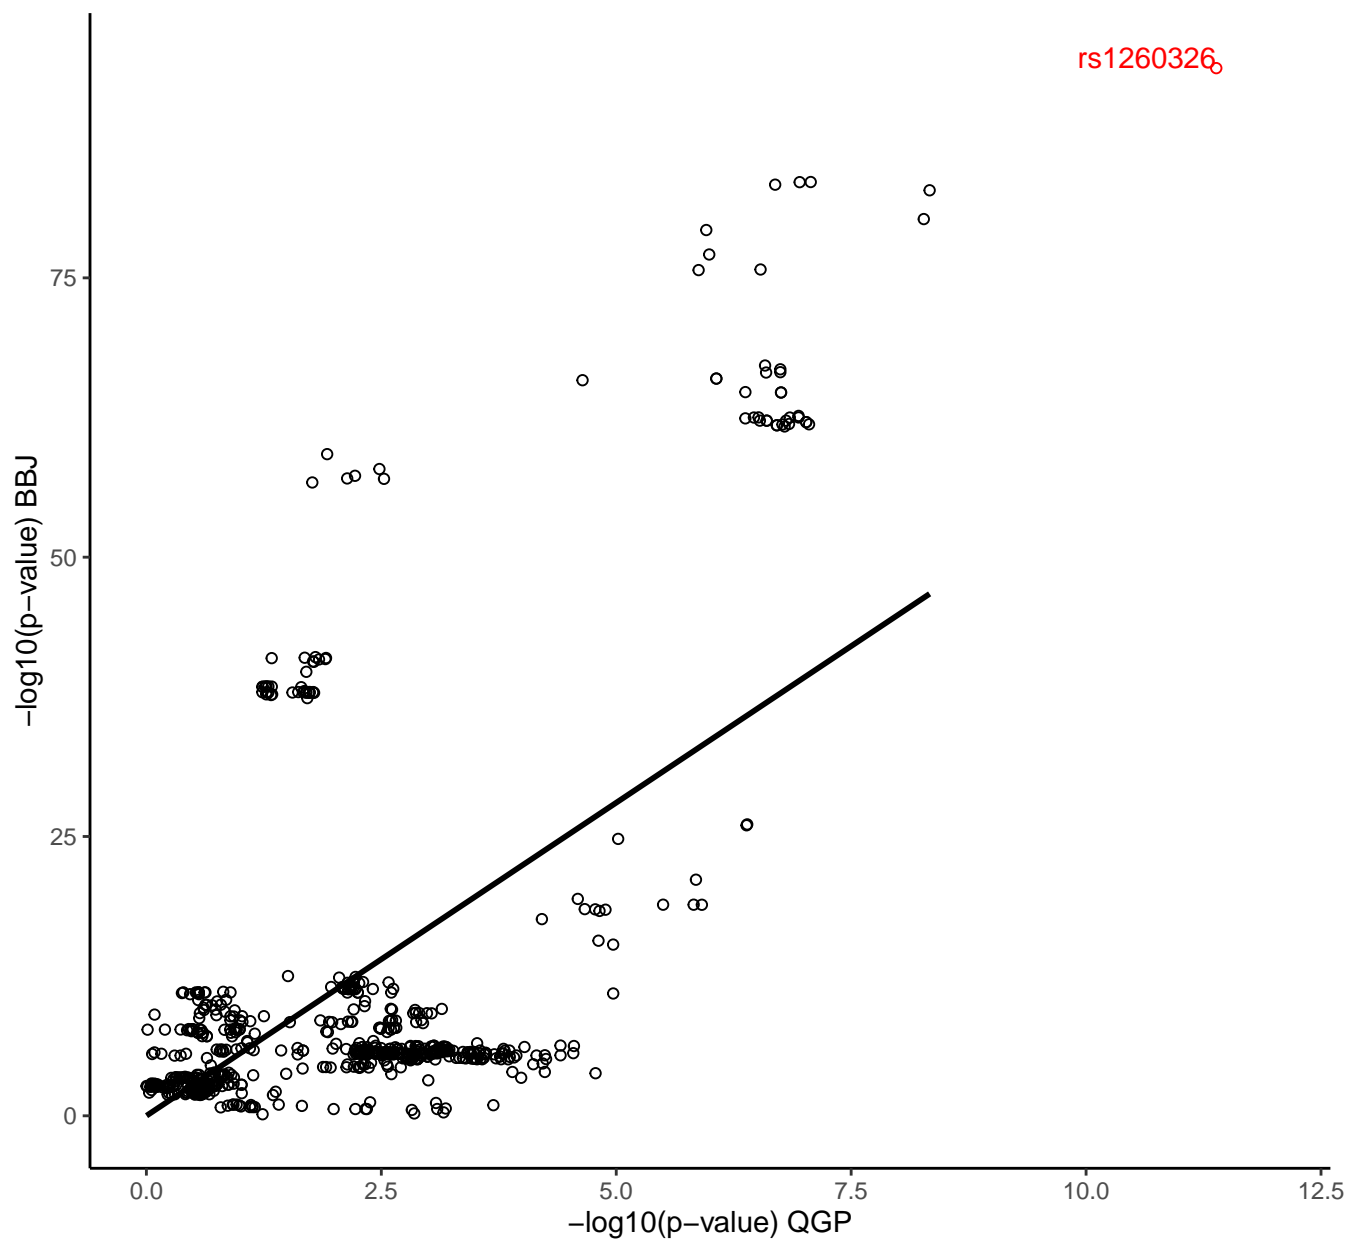

Plt rs1354034

nSNPs = 1879; H2: 1.97e-07; H3: 1.26e-07; H4: 1

rs1354034

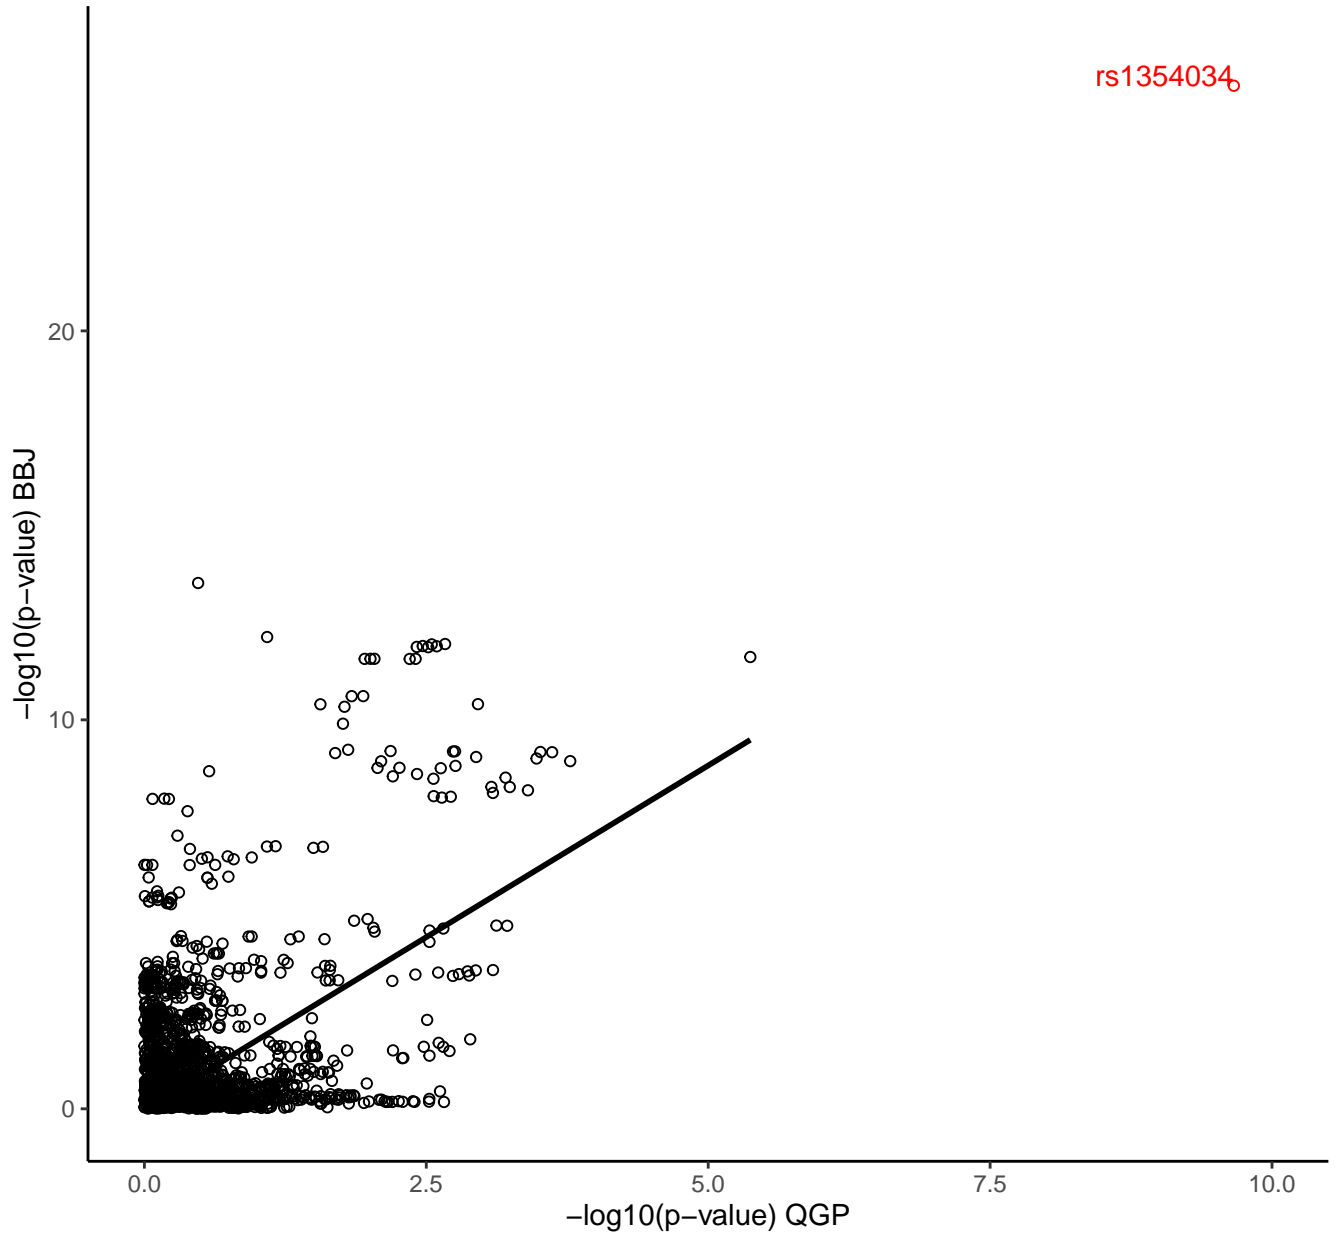

ALP rs10822161

nSNPs = 1514; H2: 1.6e-07; H3: 0.0899; H4: 0.91

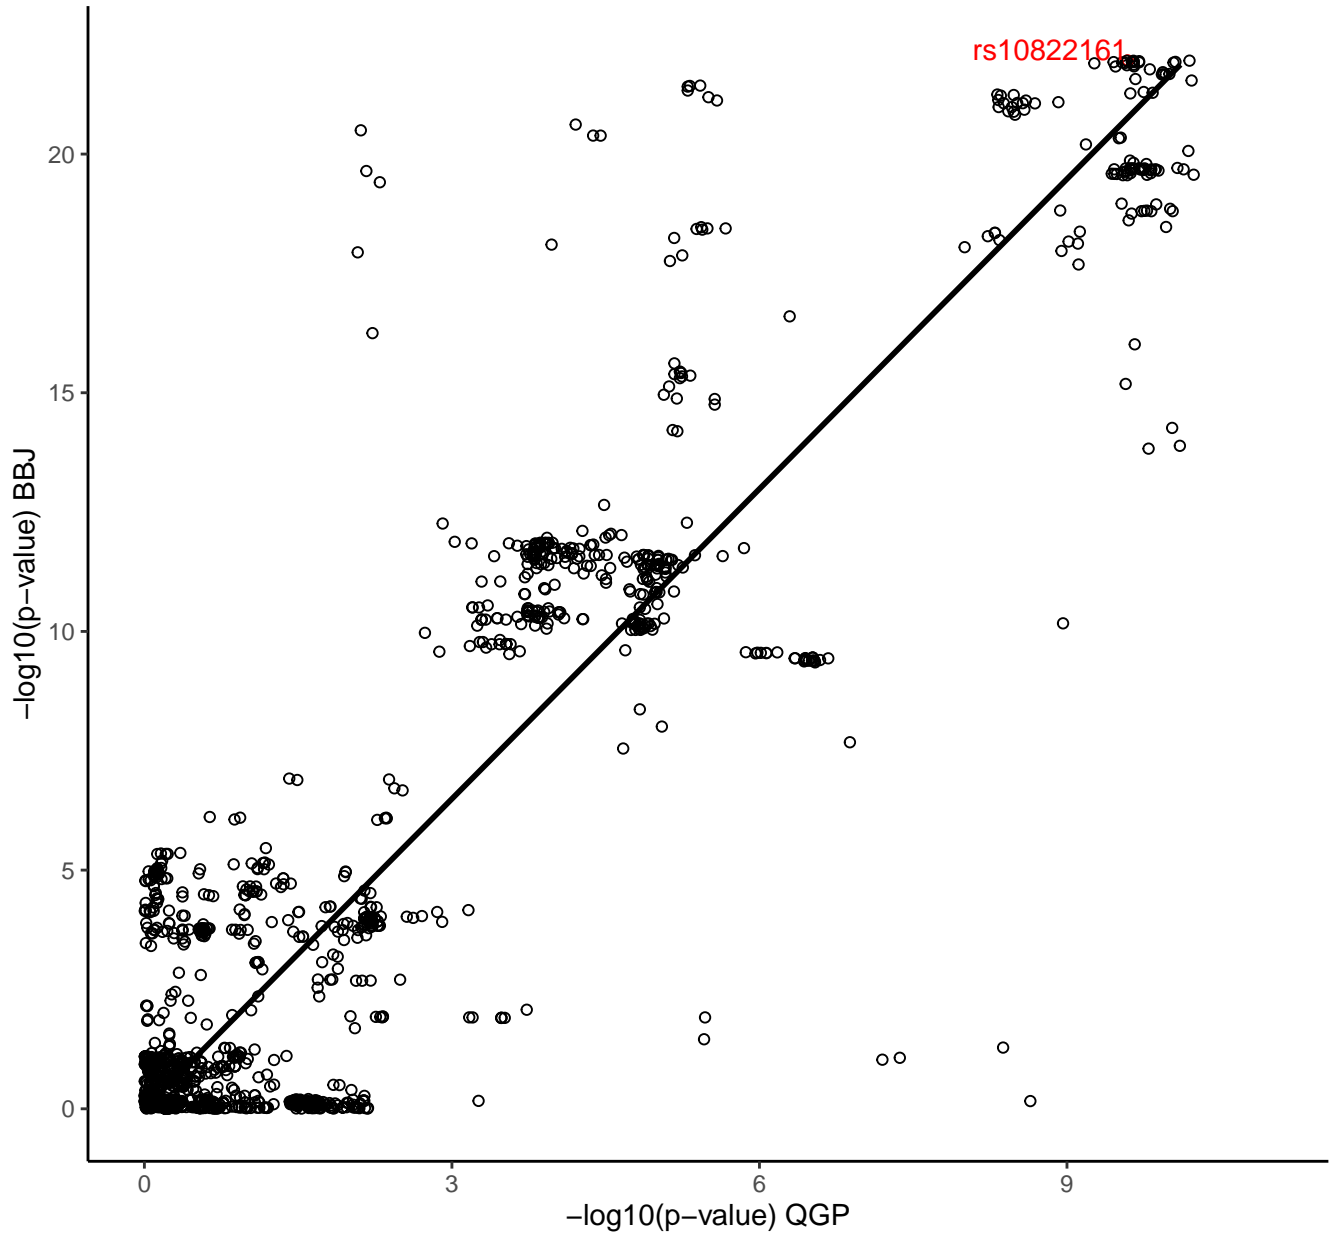

Plt rs11082304

nSNPs = 1333; H2: 5.57e-07; H3: 0.00018; H4: 1

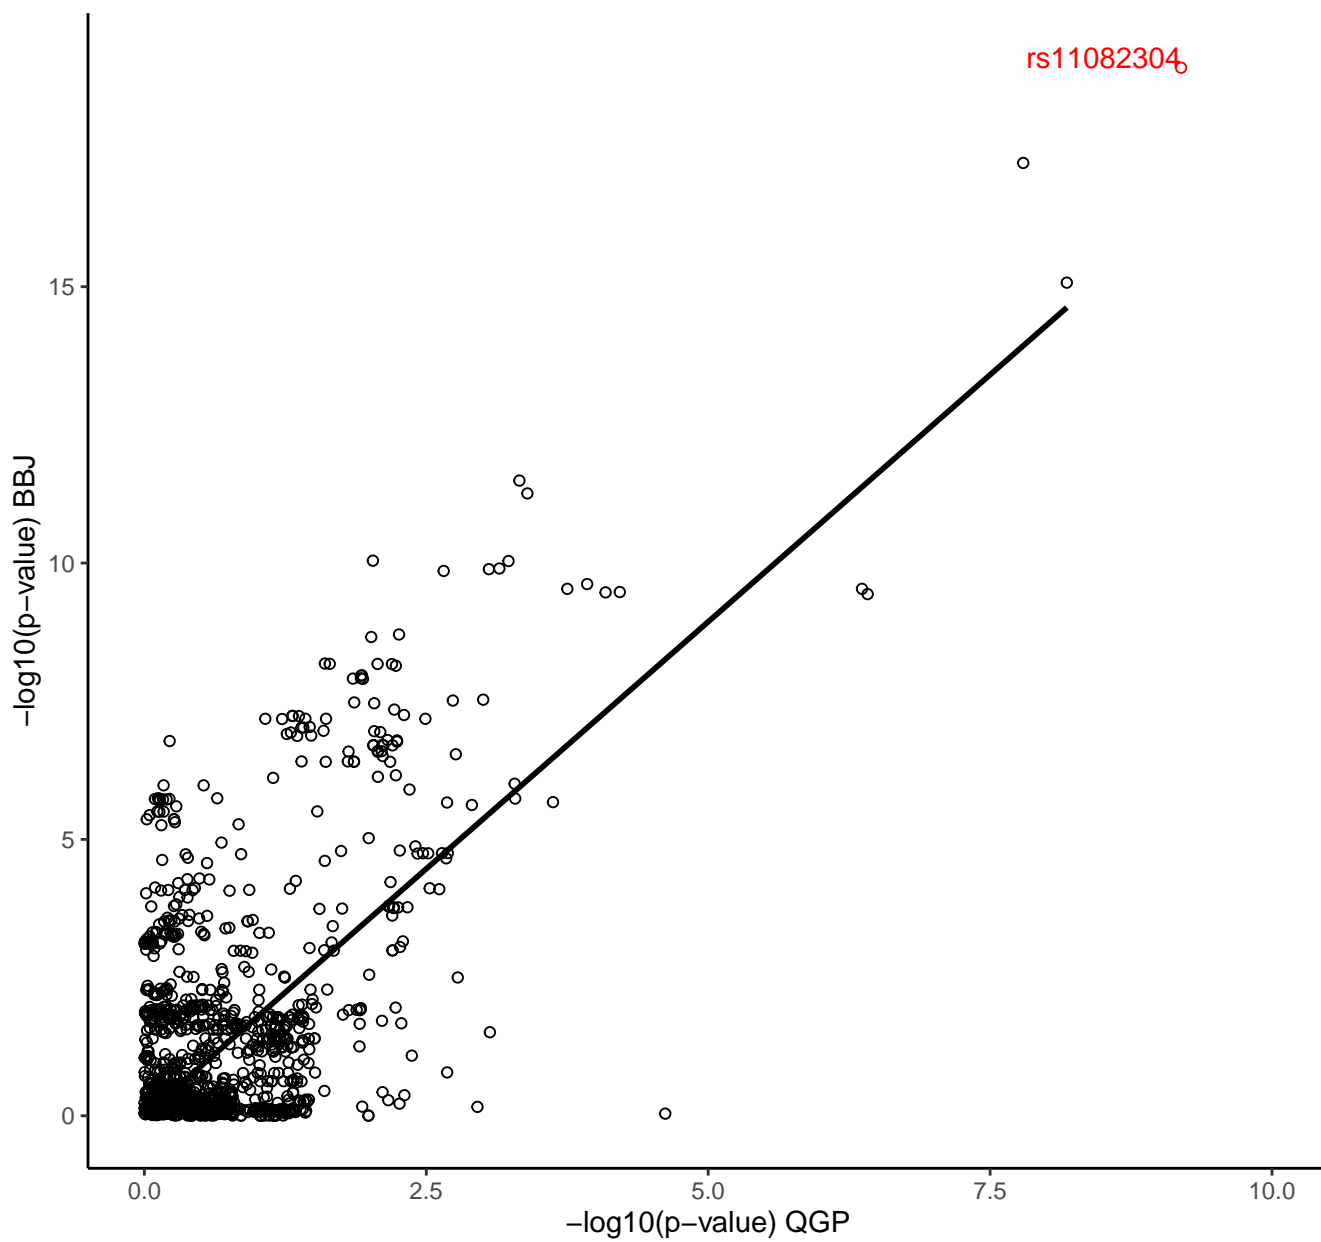

ALT rs738409

nSNPs = 2278; H2: 3.3e-05; H3: 0.0207; H4: 0.979

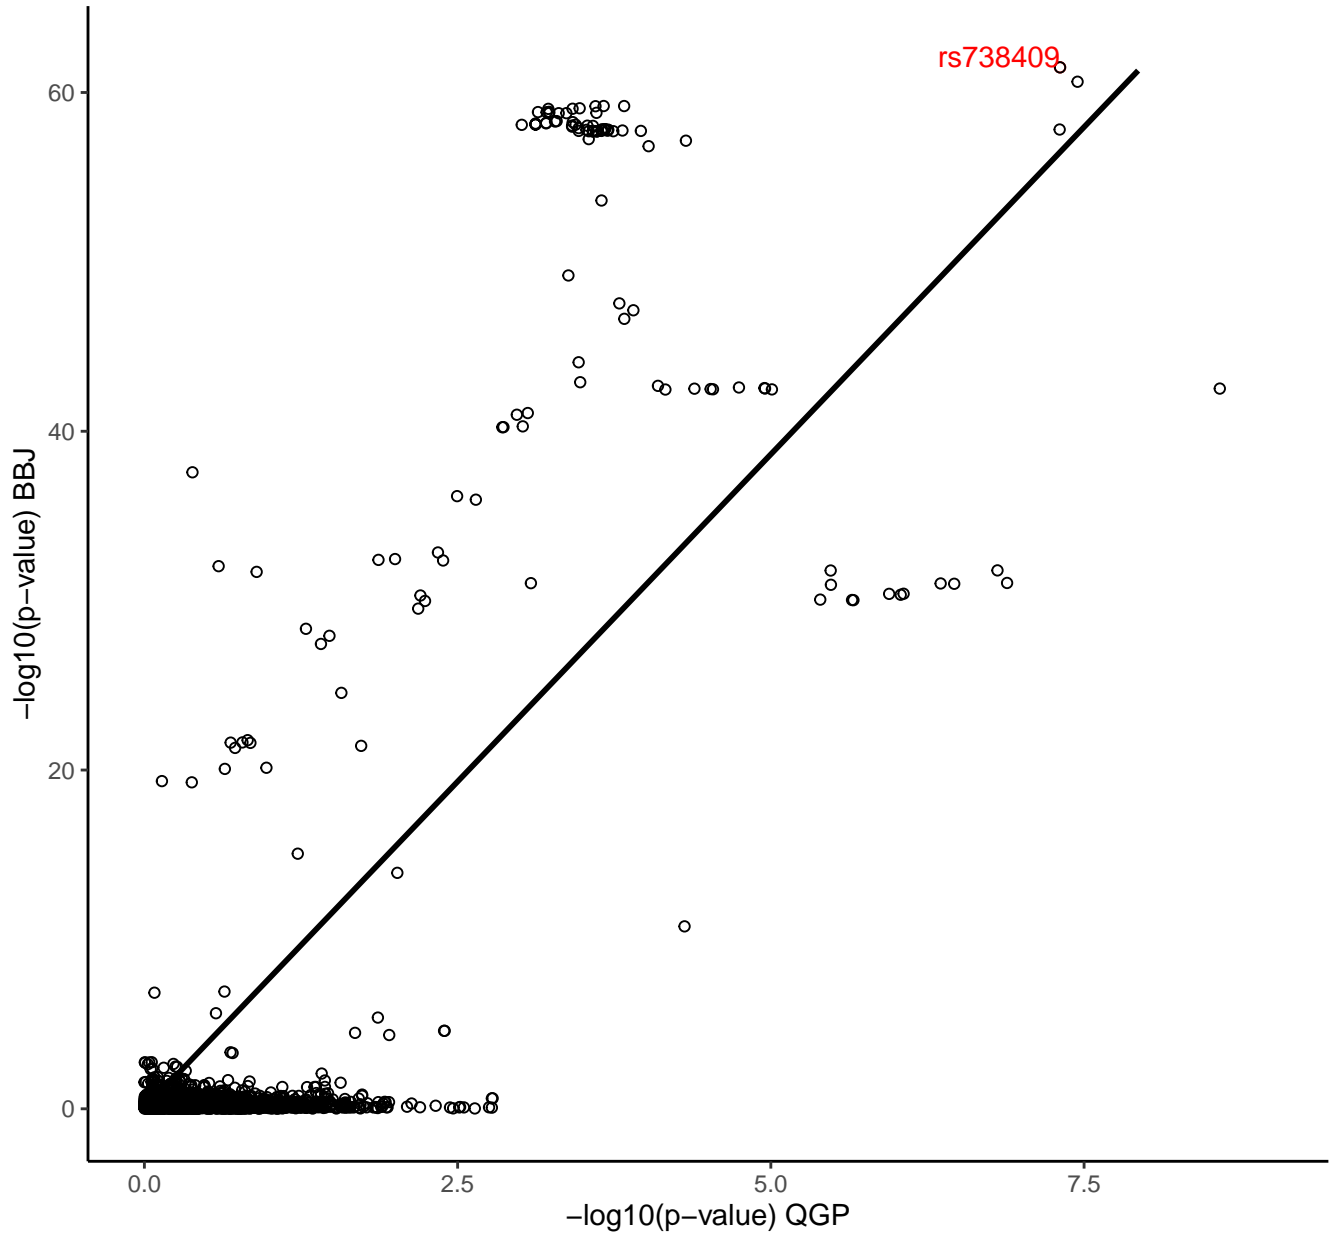



### HDL-C rs325

nSNPs = 2587; H2: 1.6e-05; H3: 0.142; H4: 0.858

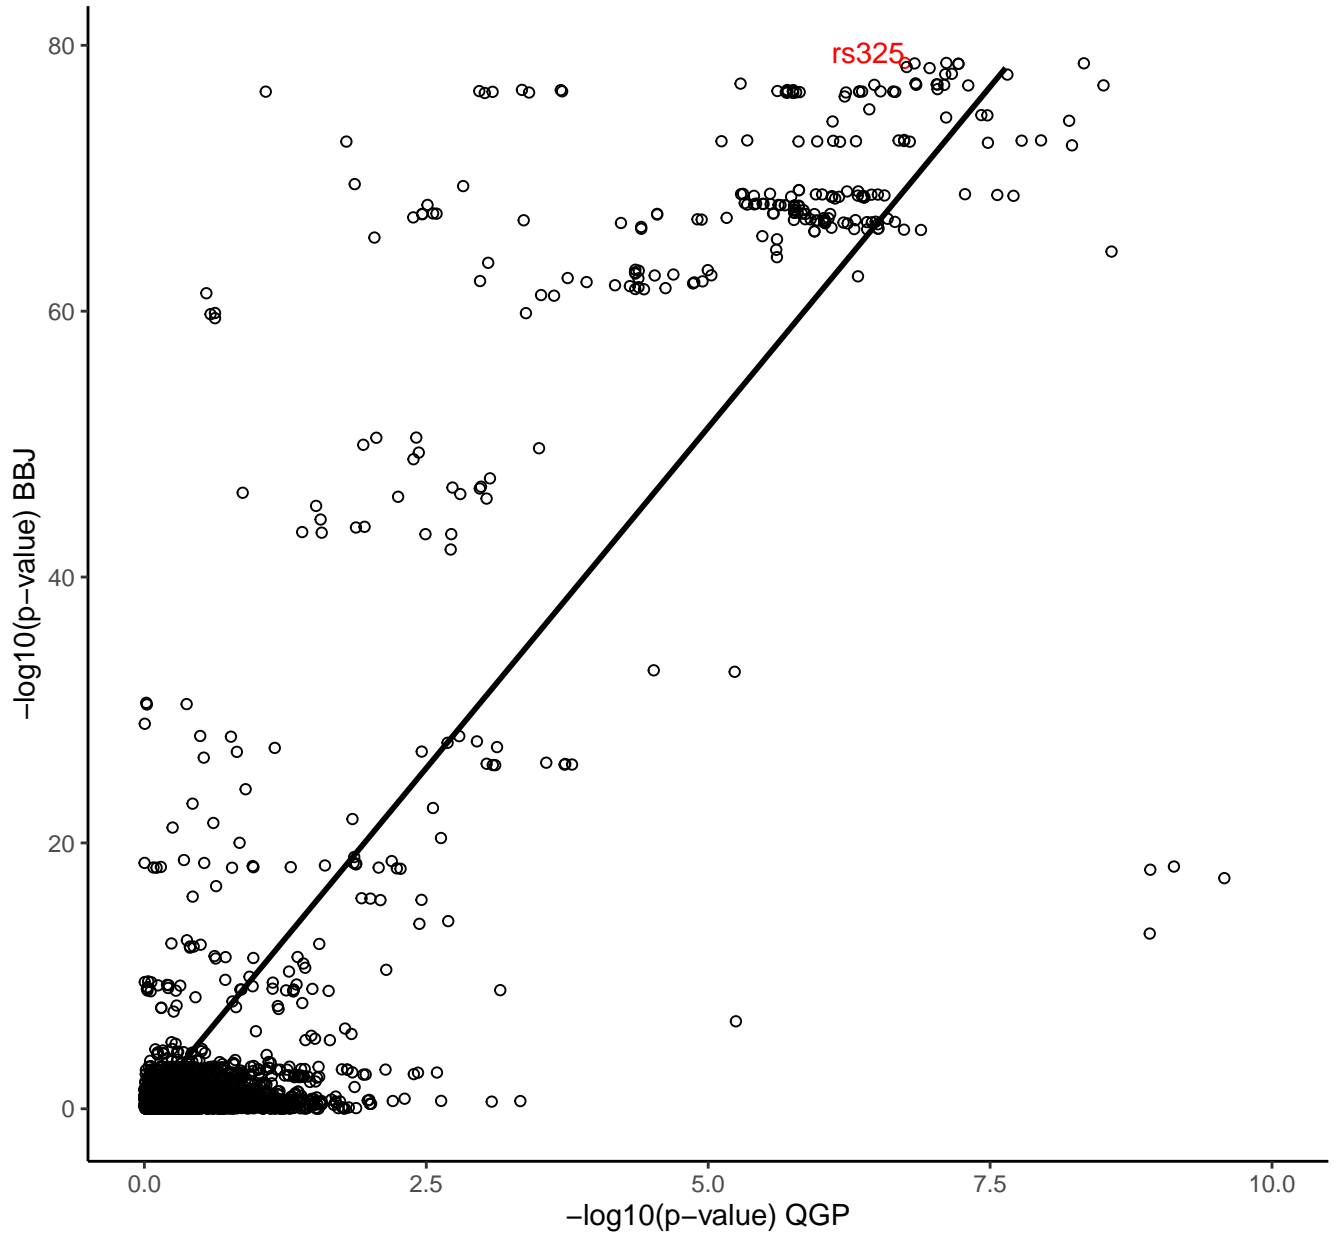

RBC rs9376090

nSNPs = 1314; H2: 0.000131; H3: 0.436; H4: 0.564

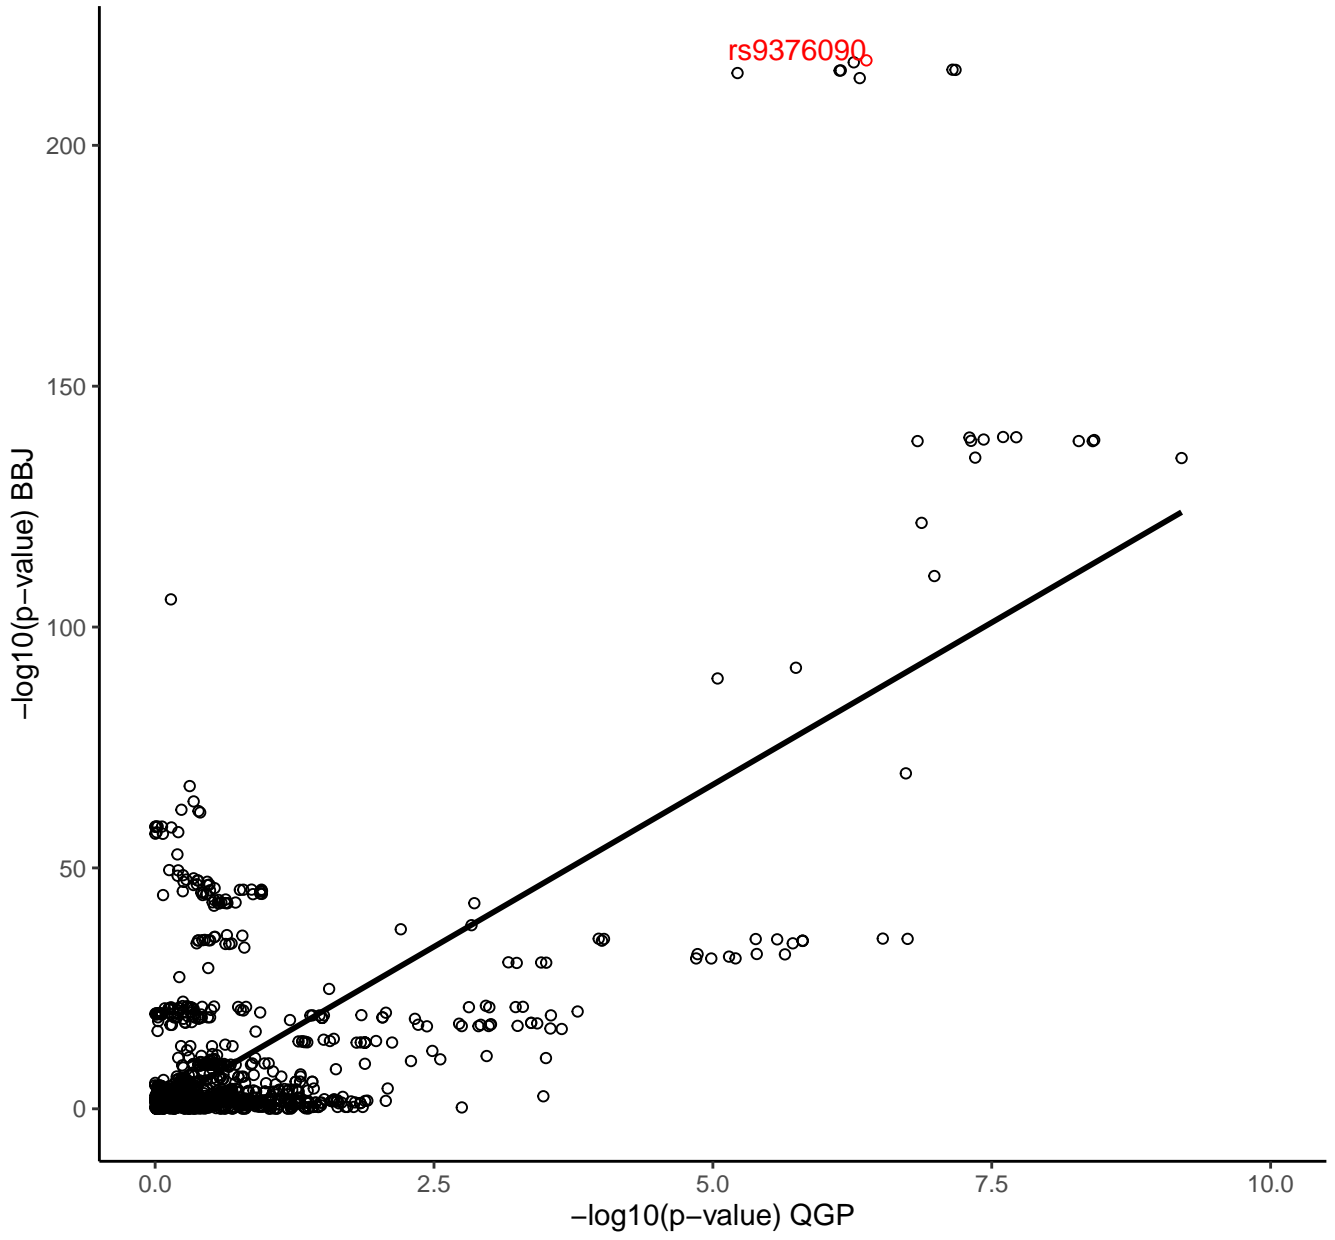

TG rs58542926

nSNPs = 1314; H2: 0.000835; H3: 0.0271; H4: 0.972

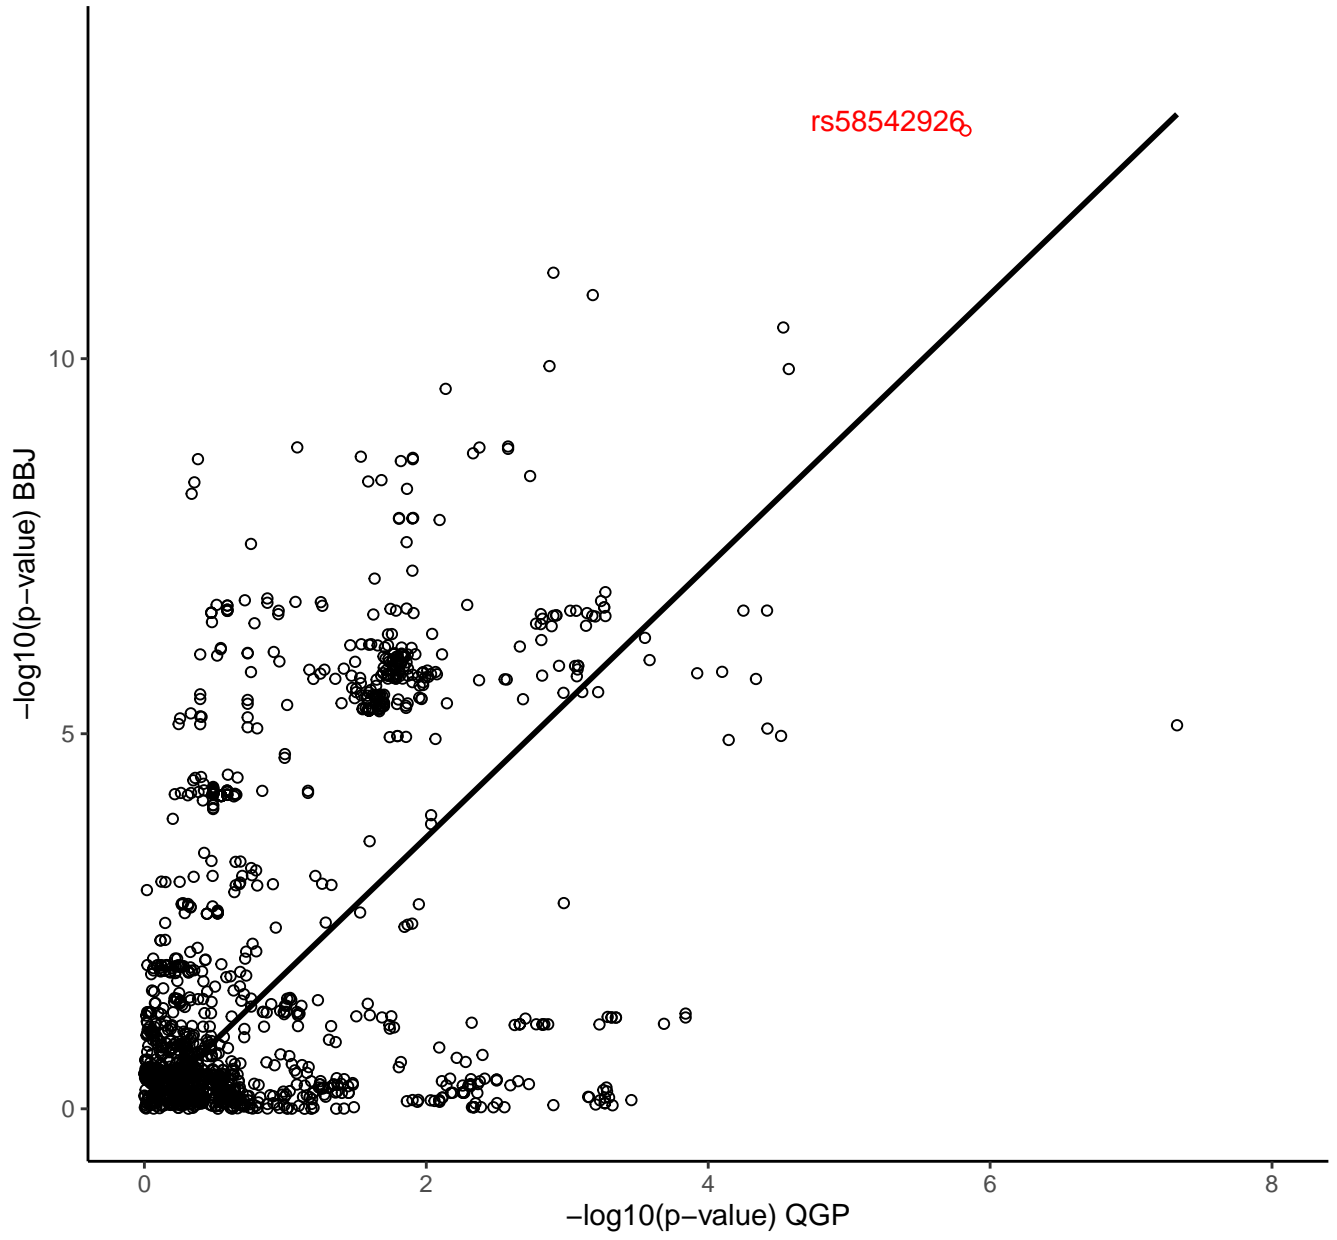

TG rs1059611

nSNPs = 2590; H2: 0.000736; H3: 0.114; H4: 0.885

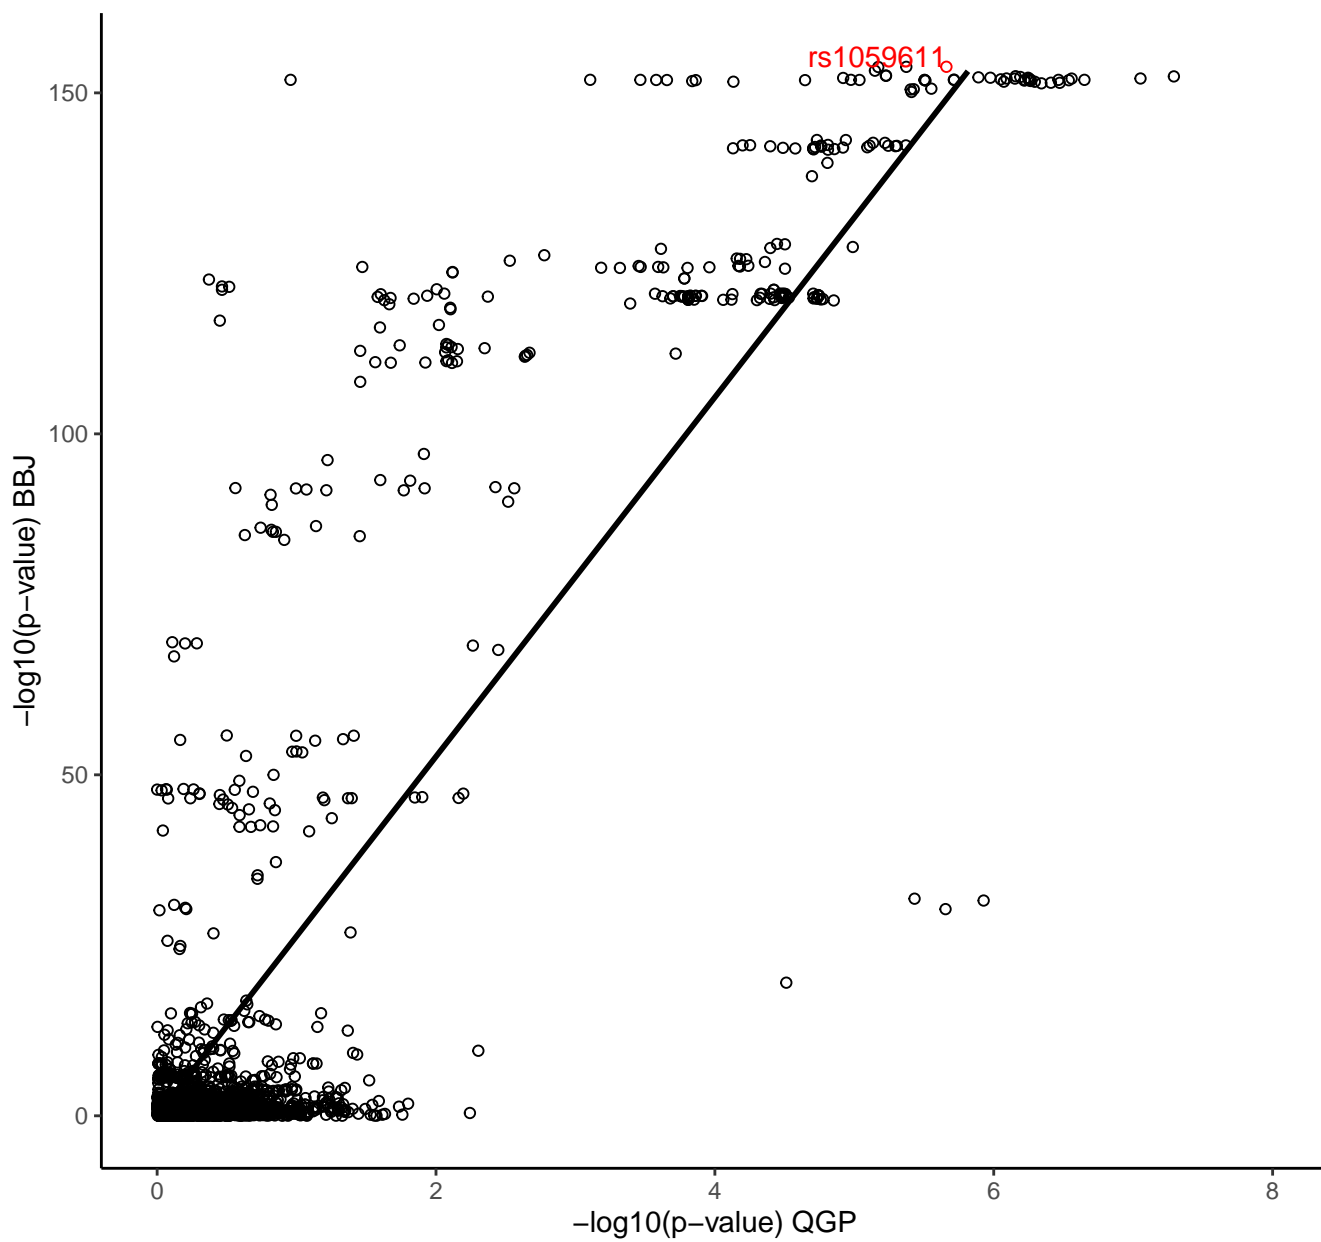

sCr rs3812036

nSNPs = 808; H2: 0.00545; H3: 0.184; H4: 0.81

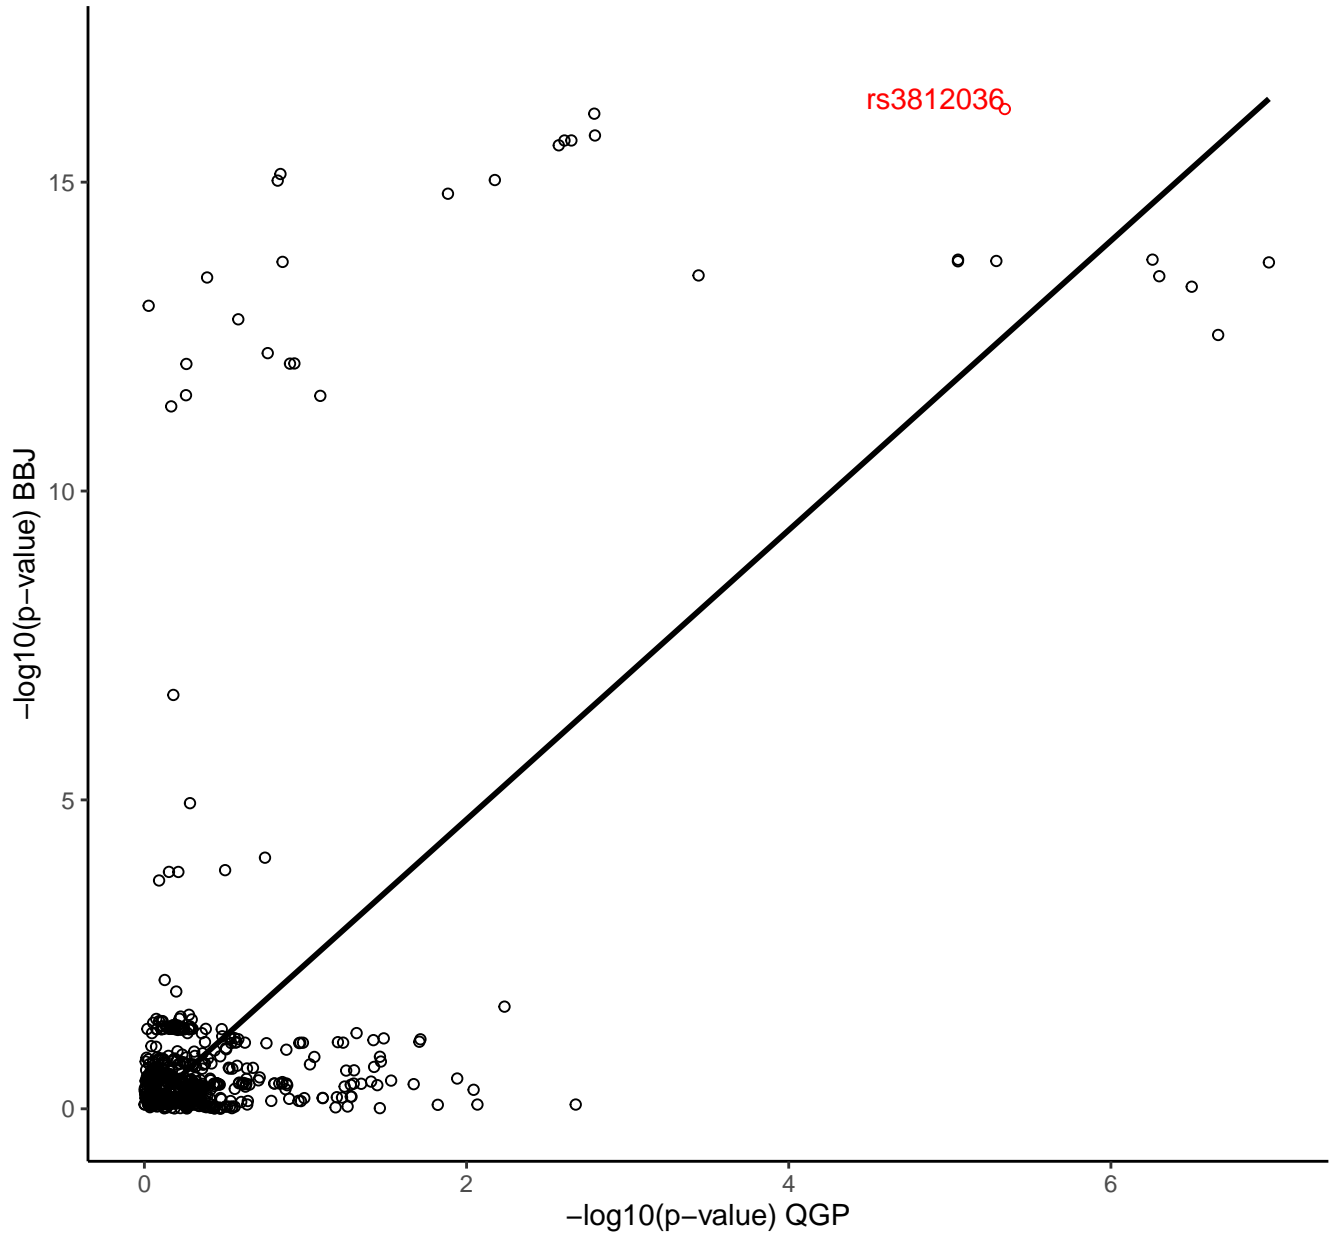

MCV rs9399137

nSNPs = 1312; H2: 0.00266; H3: 0.34; H4: 0.657

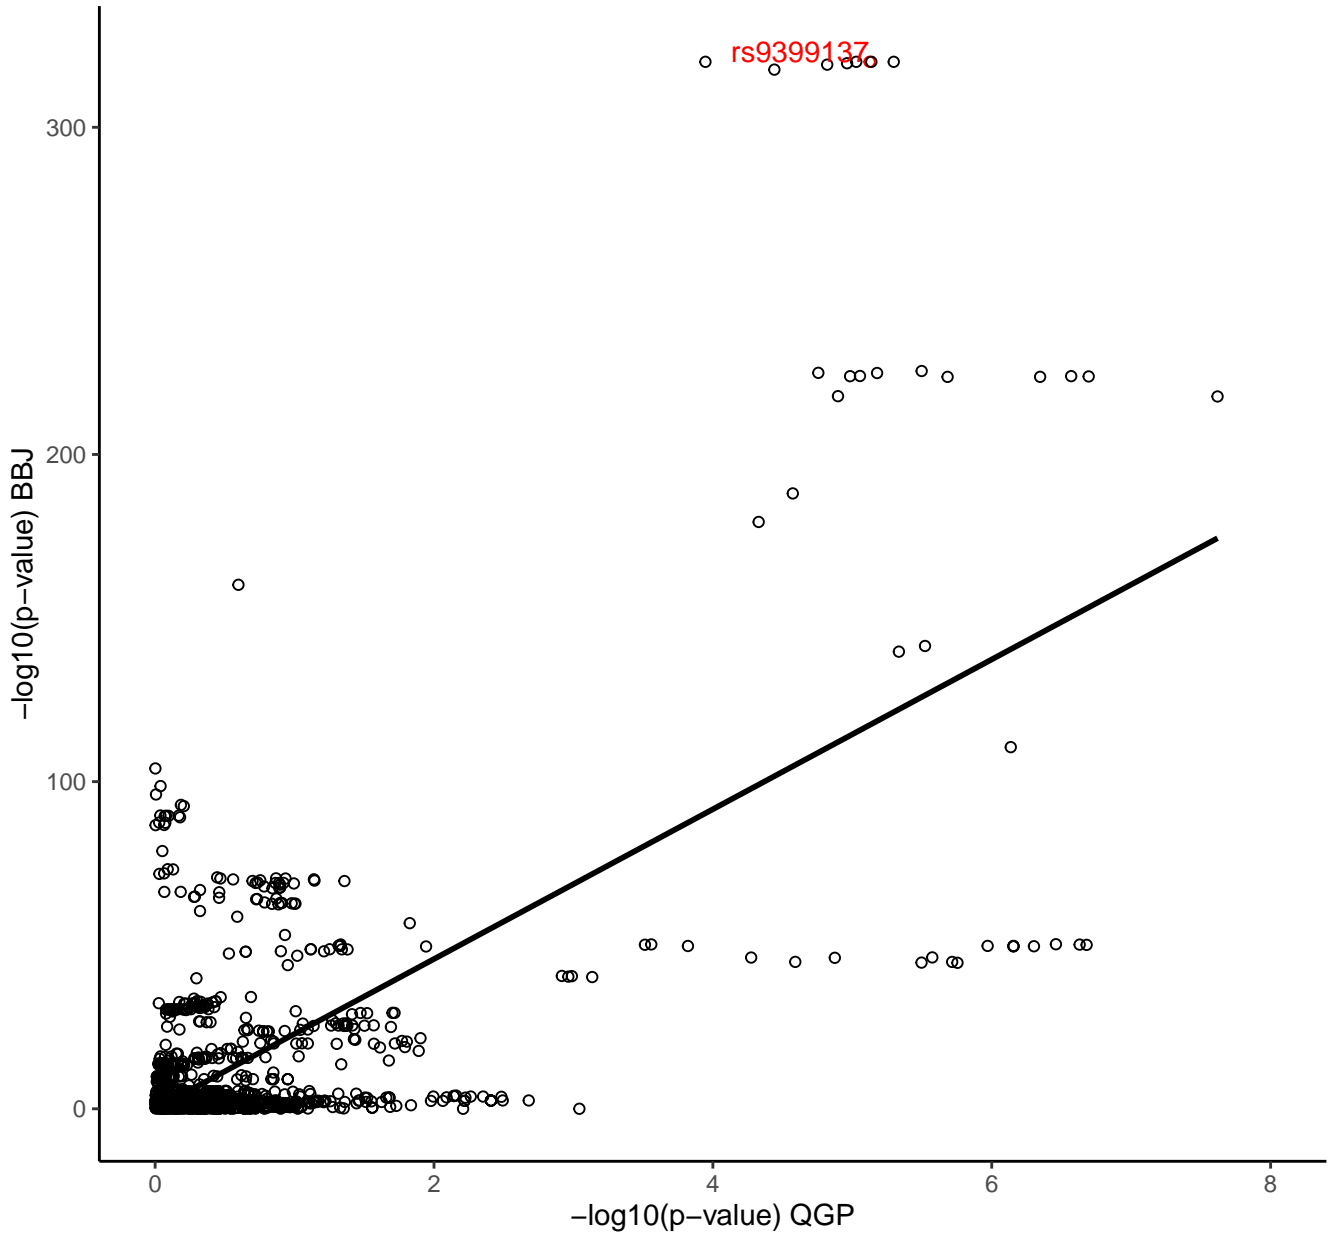

LDL-C rs2738464

nSNPs = 1221; H2: 0.0046; H3: 0.189; H4: 0.806

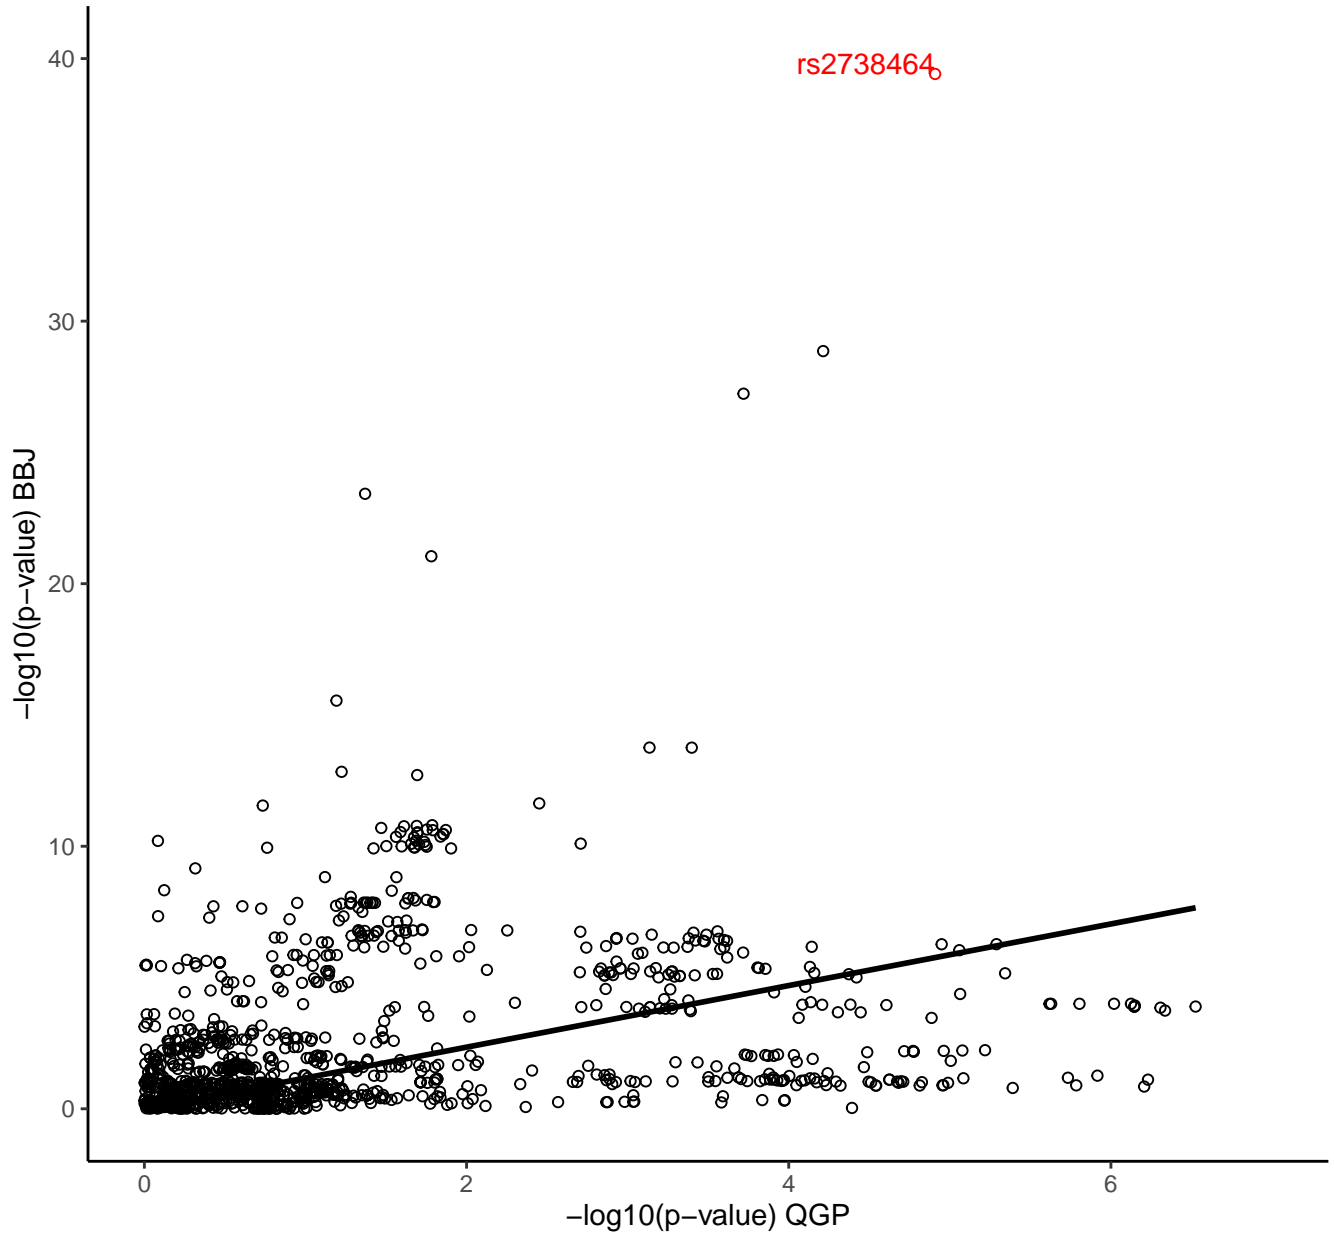

TP rs1260326

nSNPs = 708; H2: 0.00686; H3: 0.000417; H4: 0.993

rs1260326

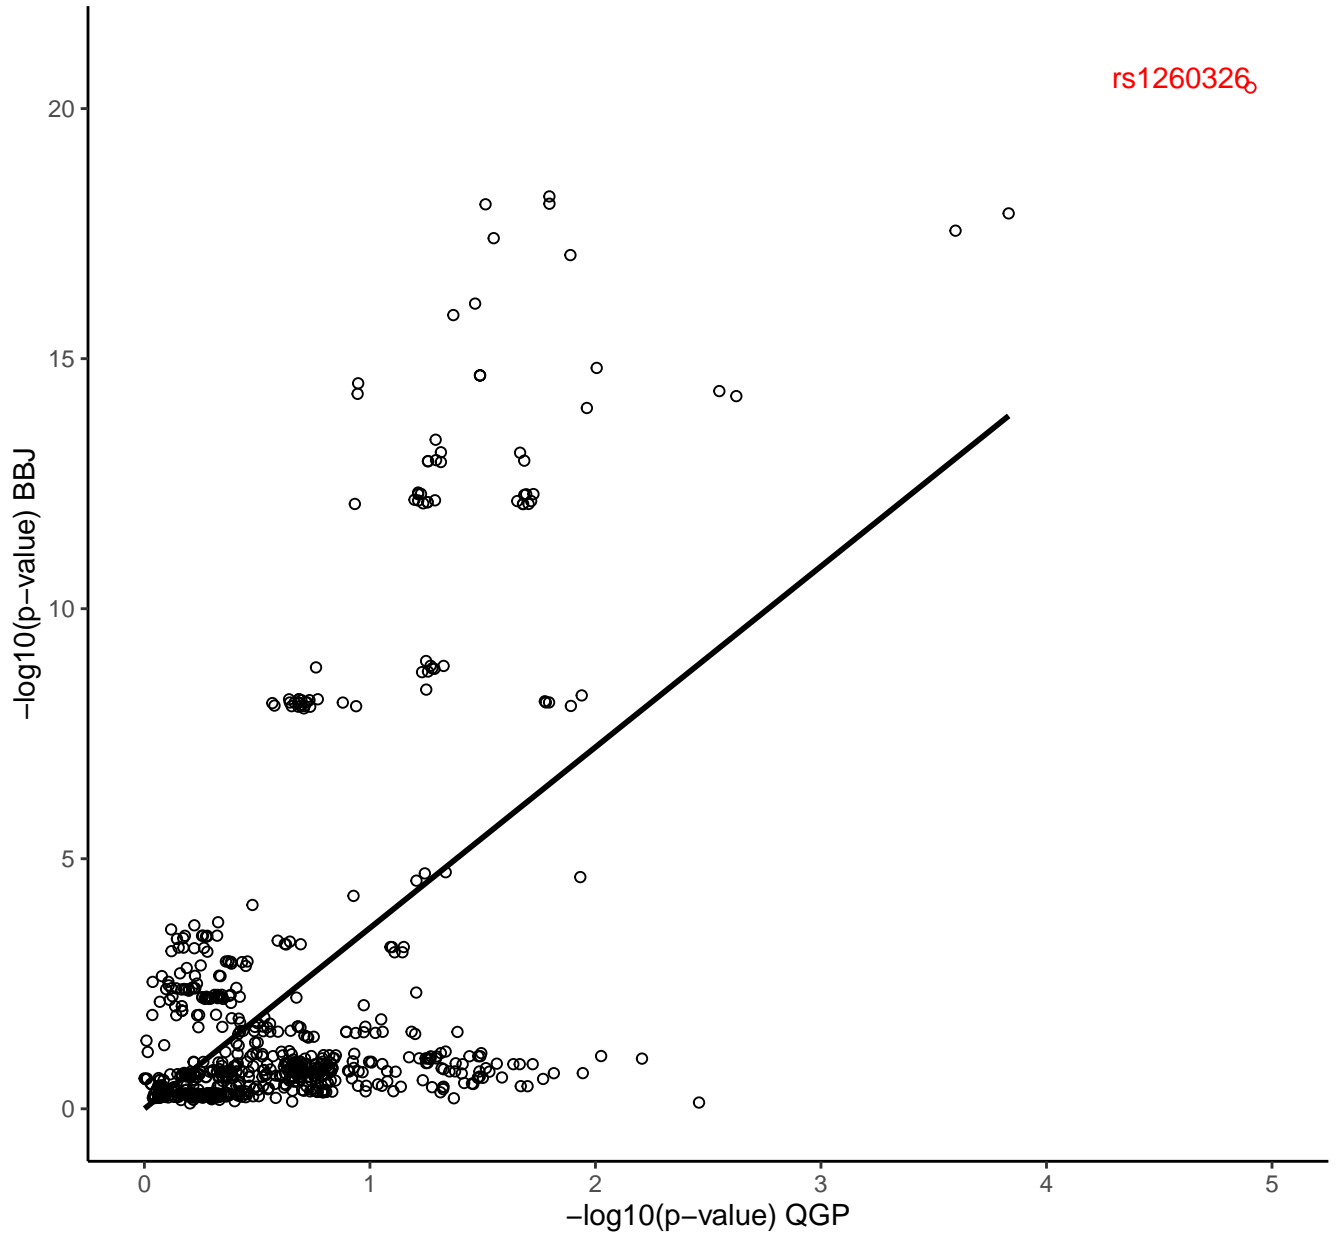



MCH rs1172135

nSNPs = 1816; H2: 0.00898; H3: 0.0444; H4: 0.947

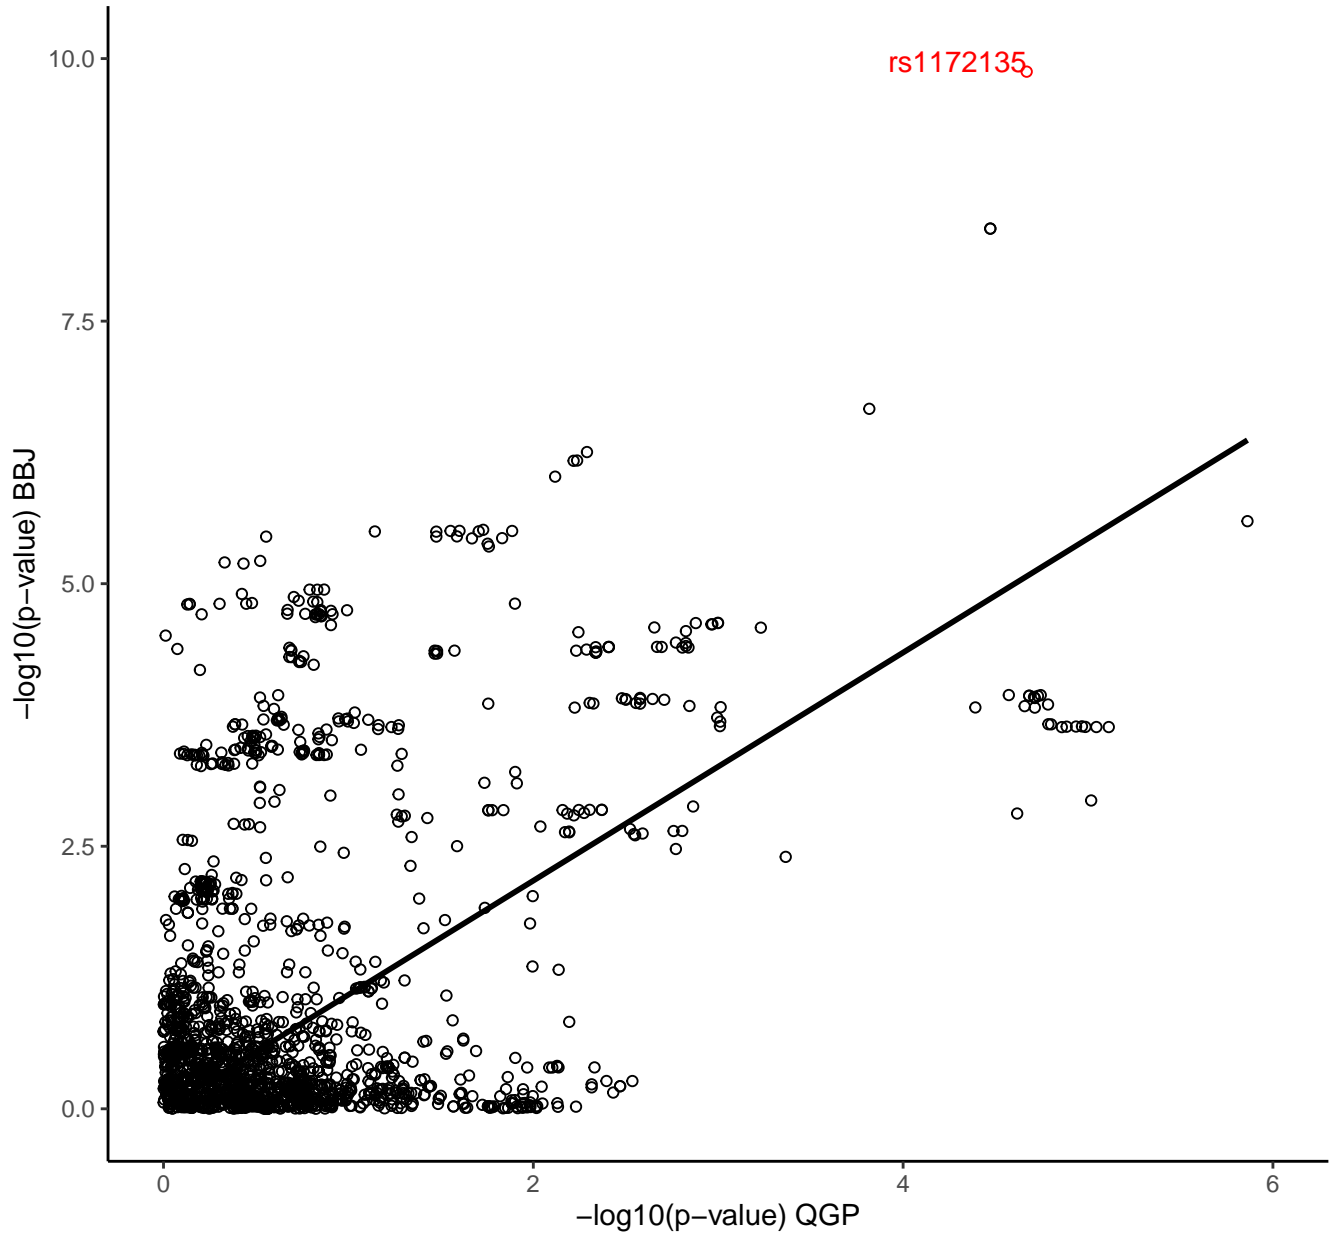

Alb rs34010237

nSNPs = 1480; H2: 0.0123; H3: 0.11; H4: 0.878

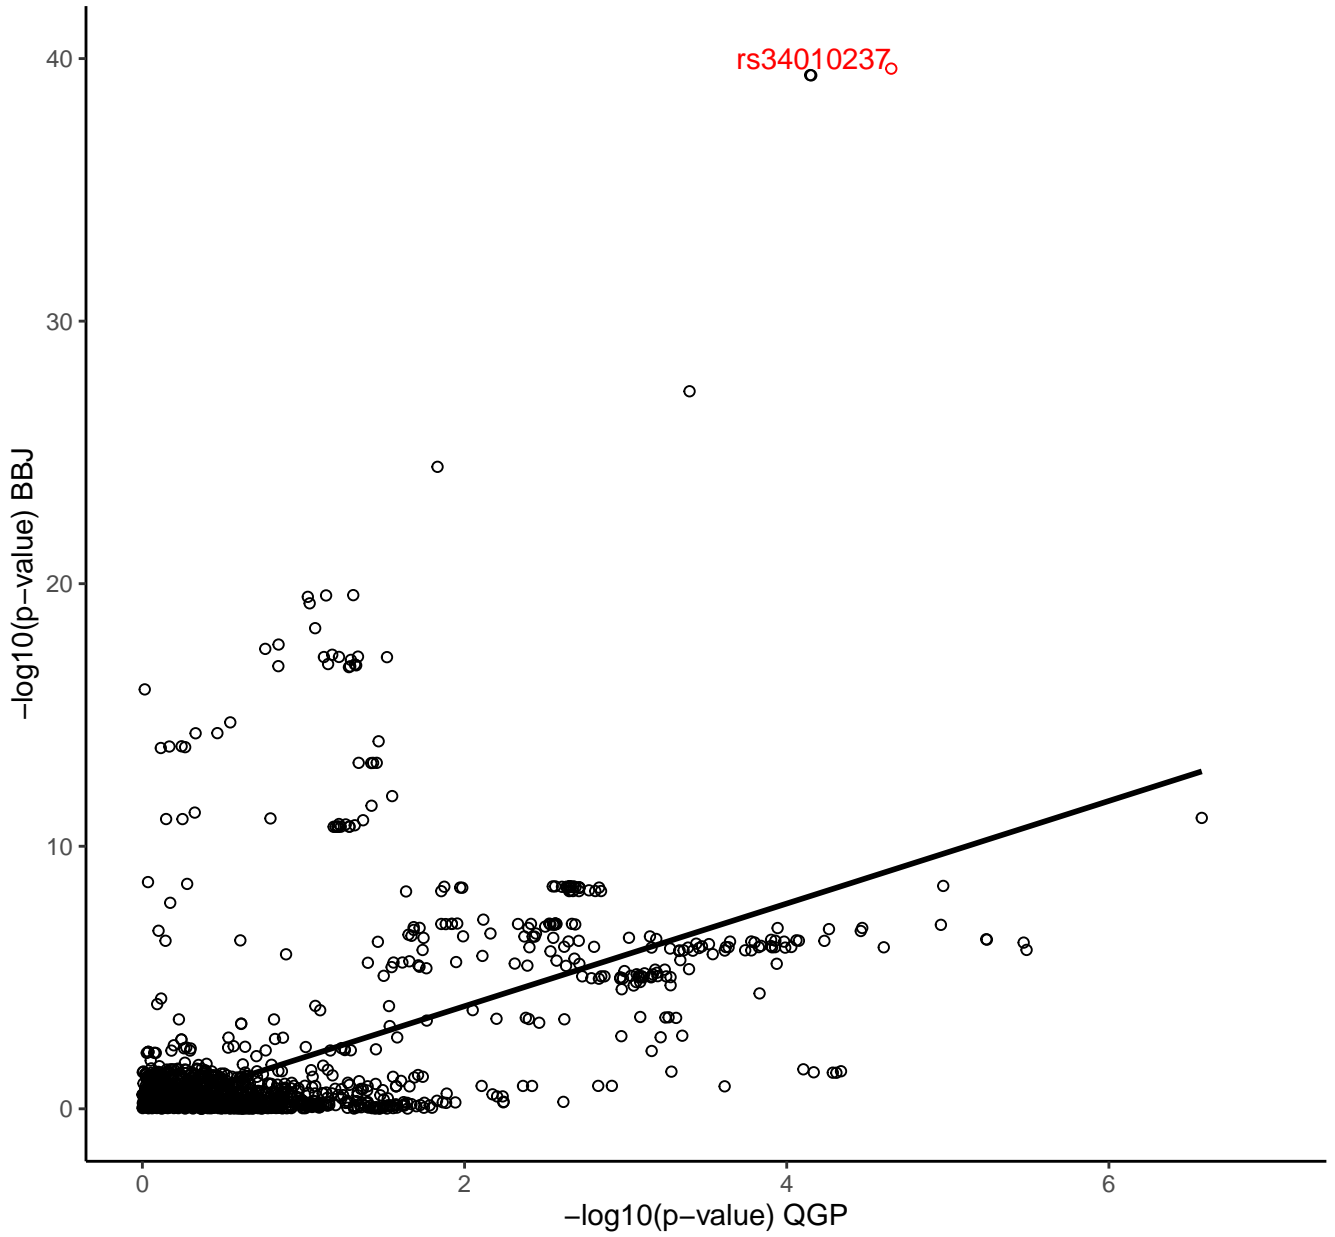

ALP rs36053309

nSNPs = 1324; H2: 1.35e-06; H3: 1; H4: 9.99e-05

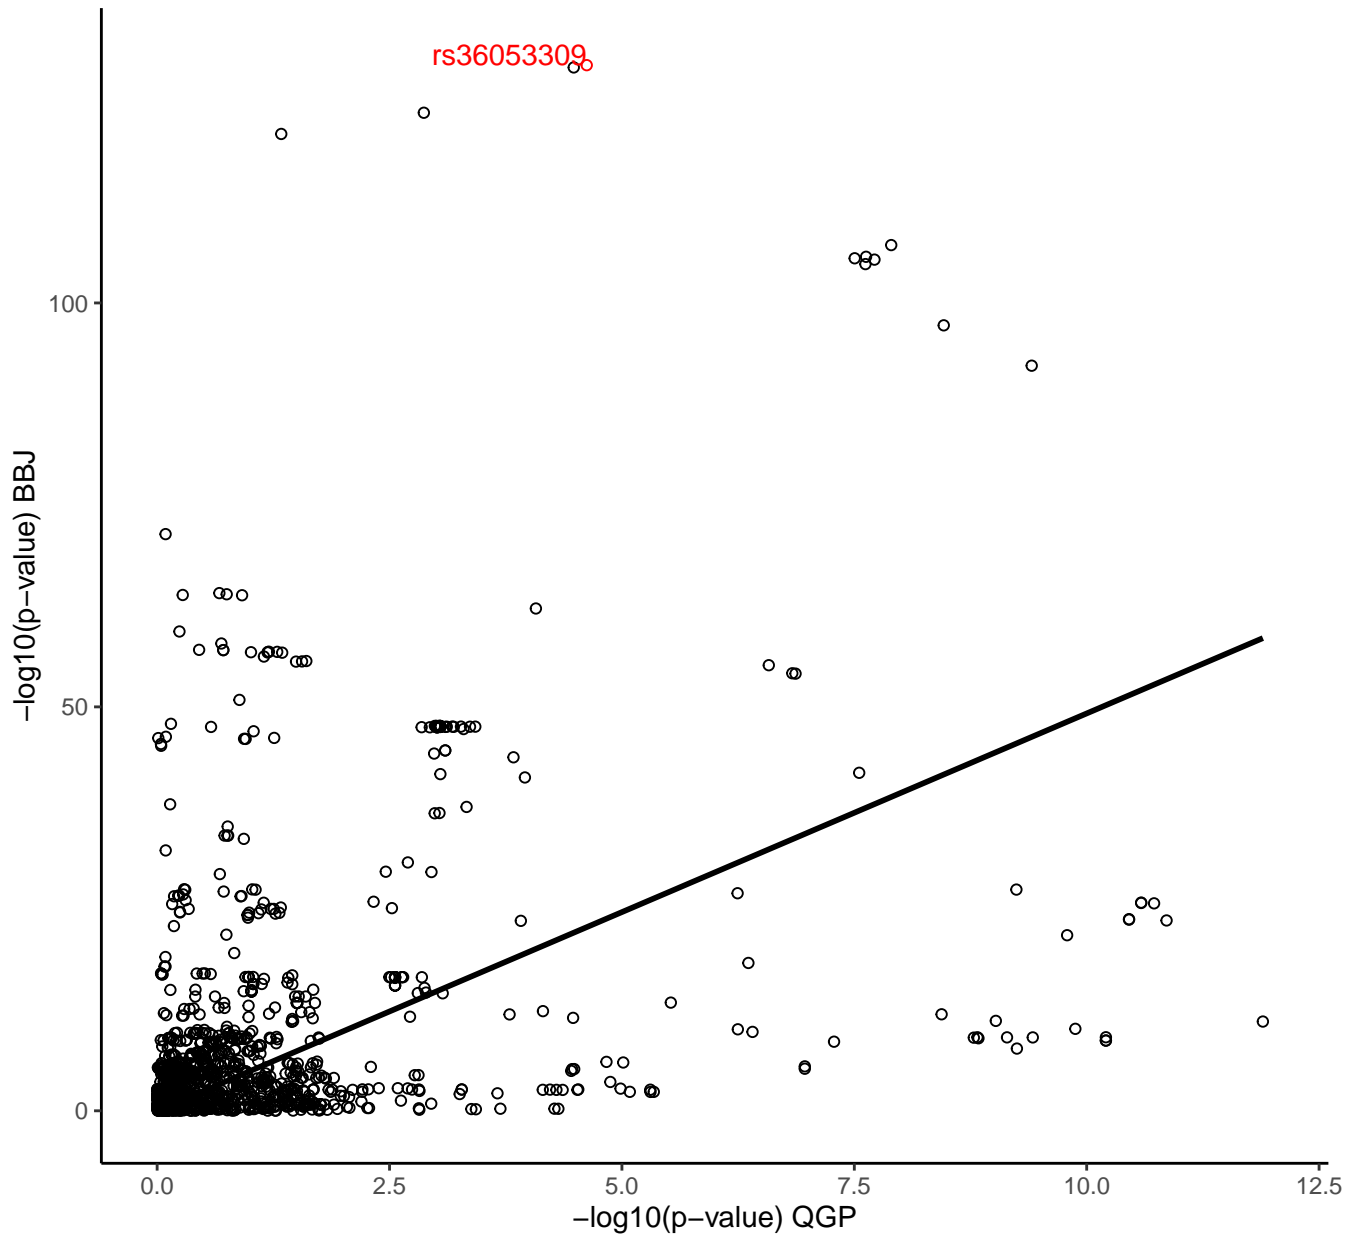

### AST rs738408

nSNPs = 2278; H2: 0.0153; H3: 0.036; H4: 0.949

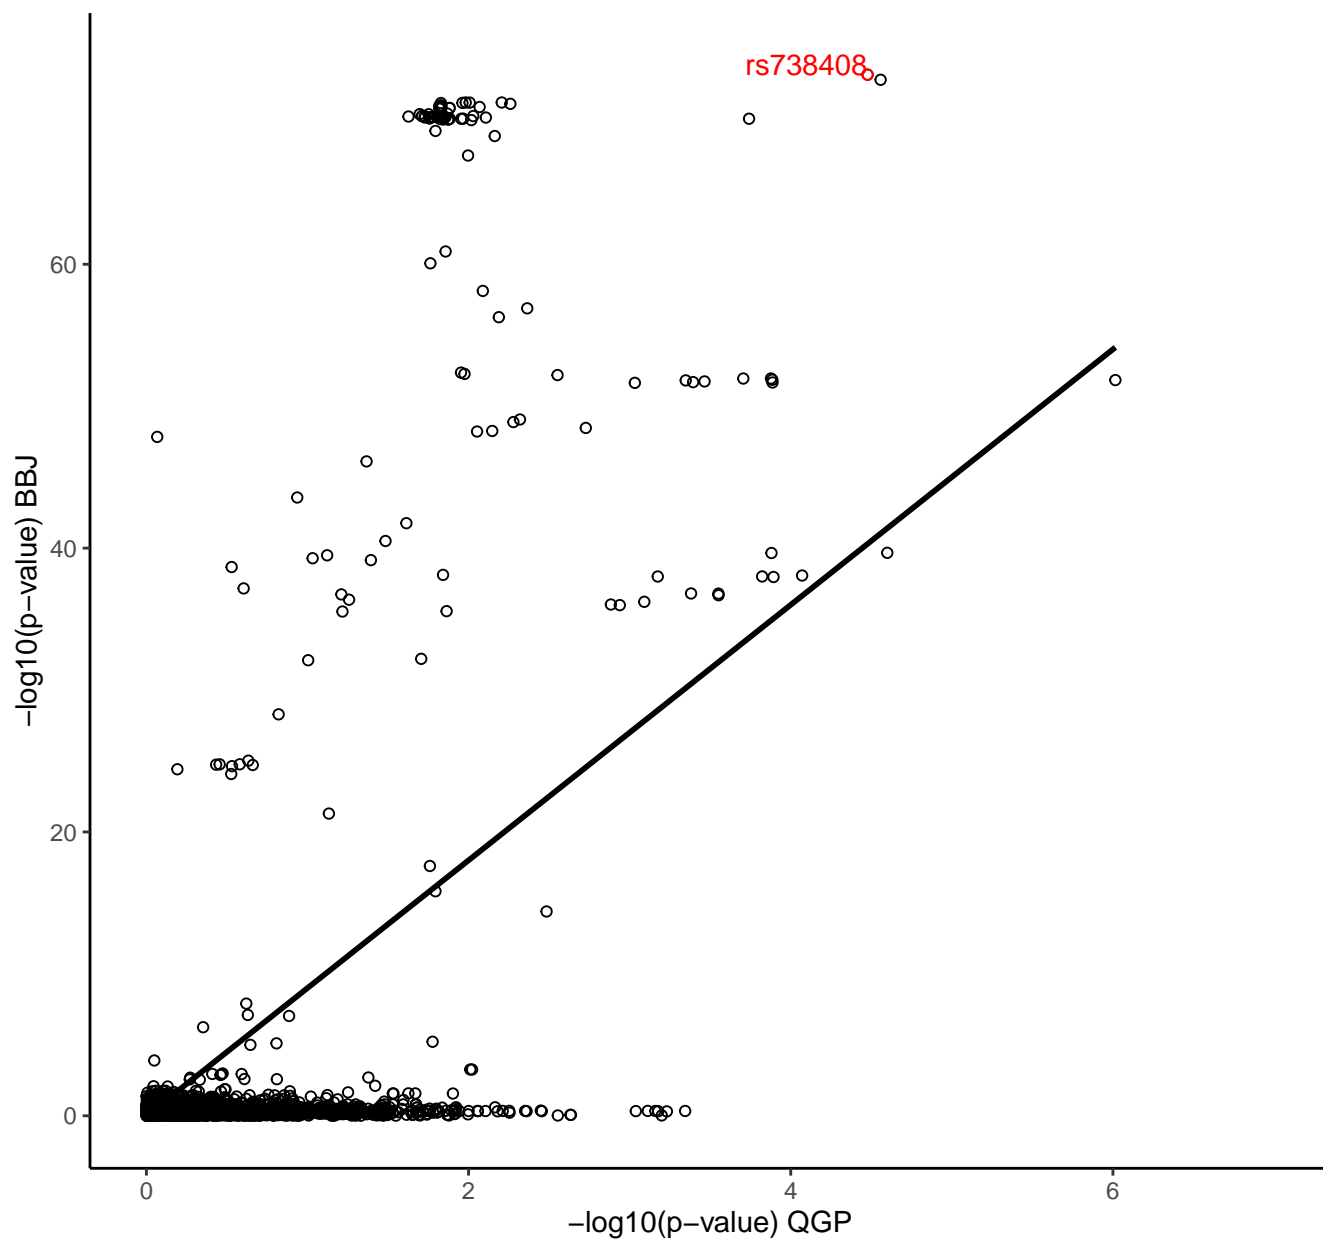

ALP rs17300770

nSNPs = 2370; H2: 5.37e-05; H3: 0.997; H4: 0.003

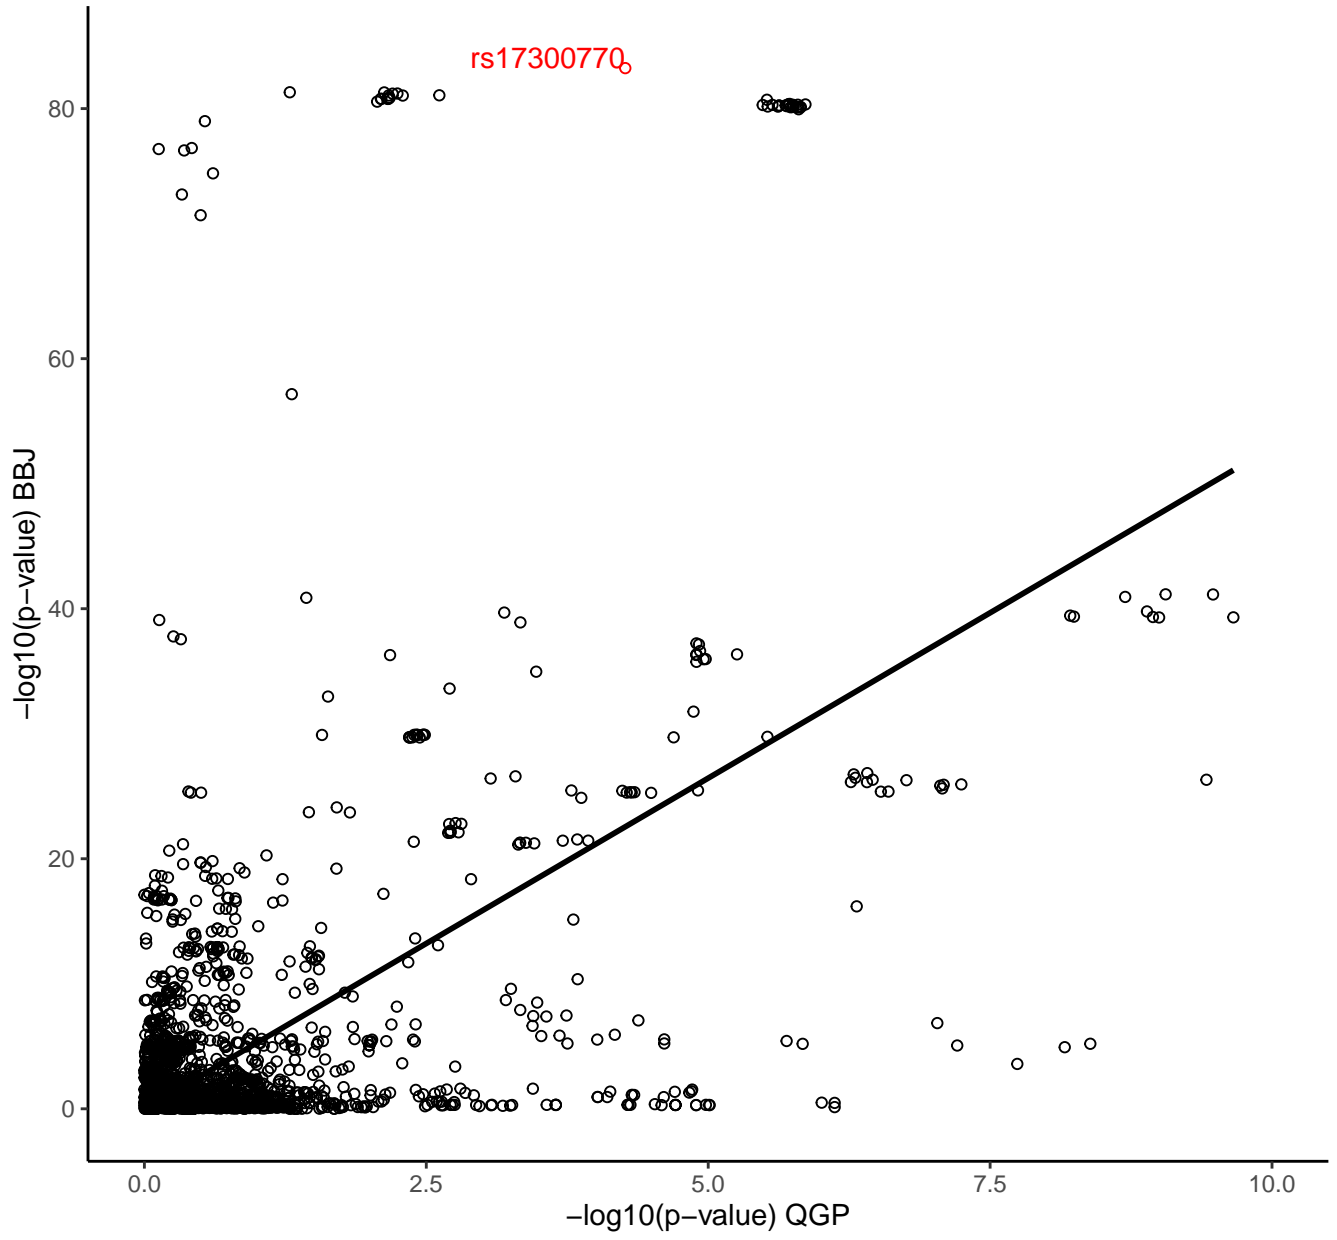

RBC rs62482241

nSNPs = 864; H2: 0.00588; H3: 0.00787; H4: 0.986

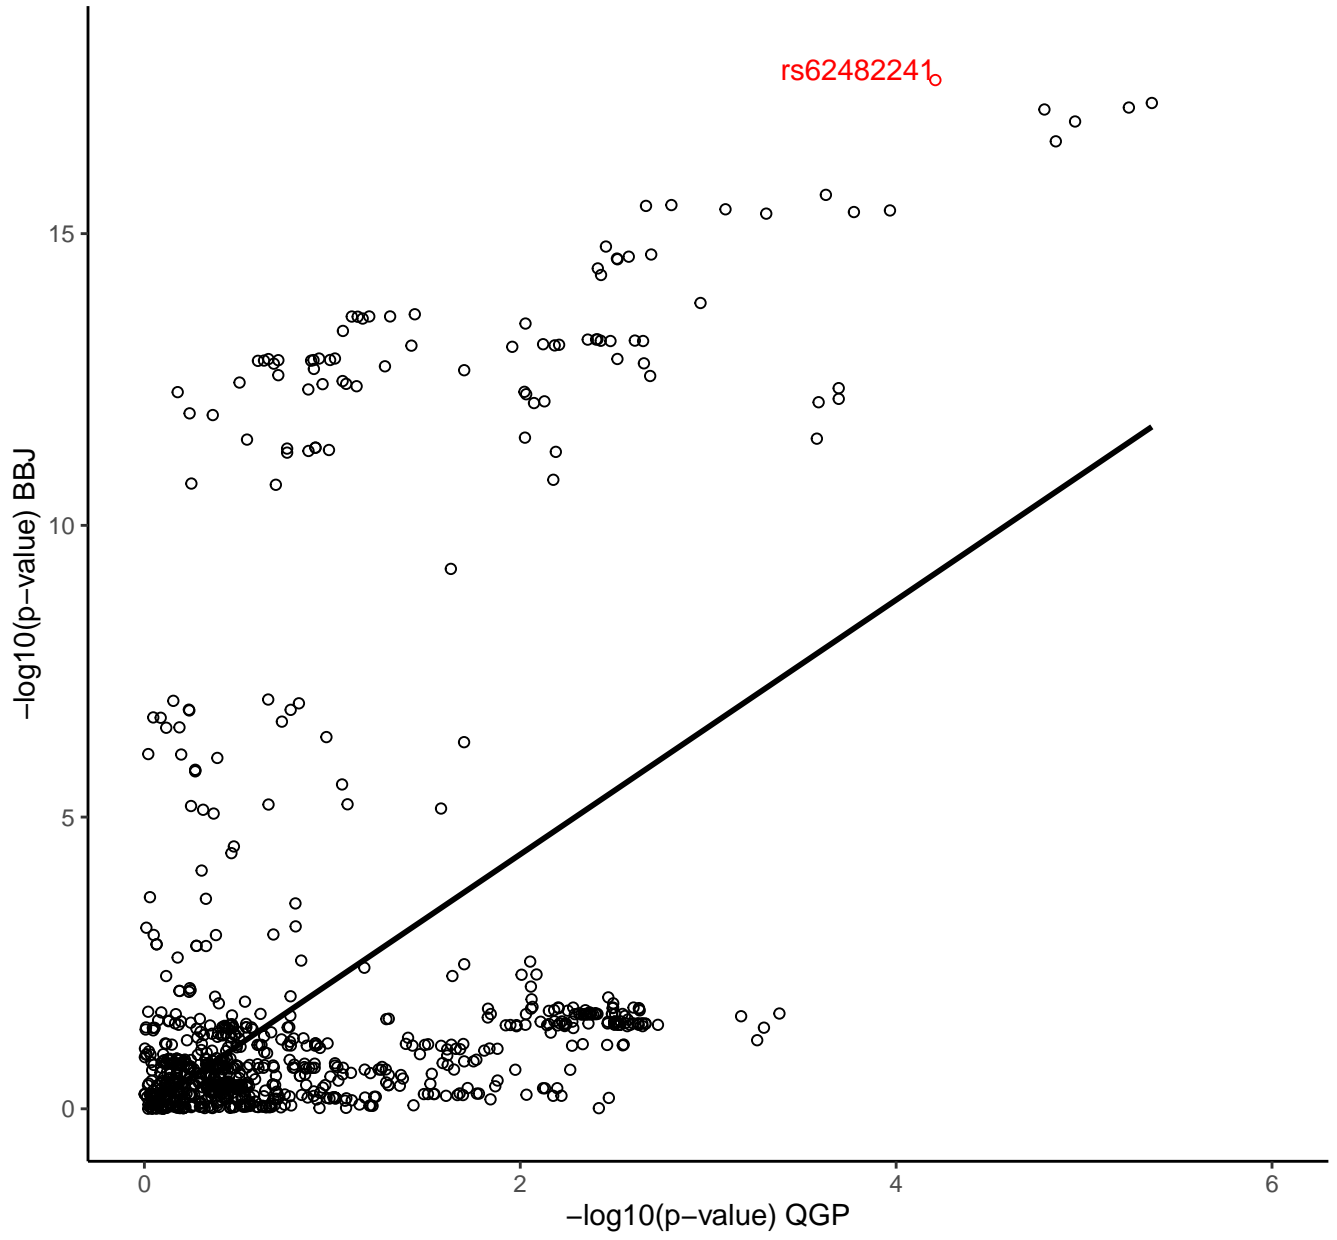

sCr rs963837

nSNPs = 1327; H2: 0.0304; H3: 0.00227; H4: 0.967

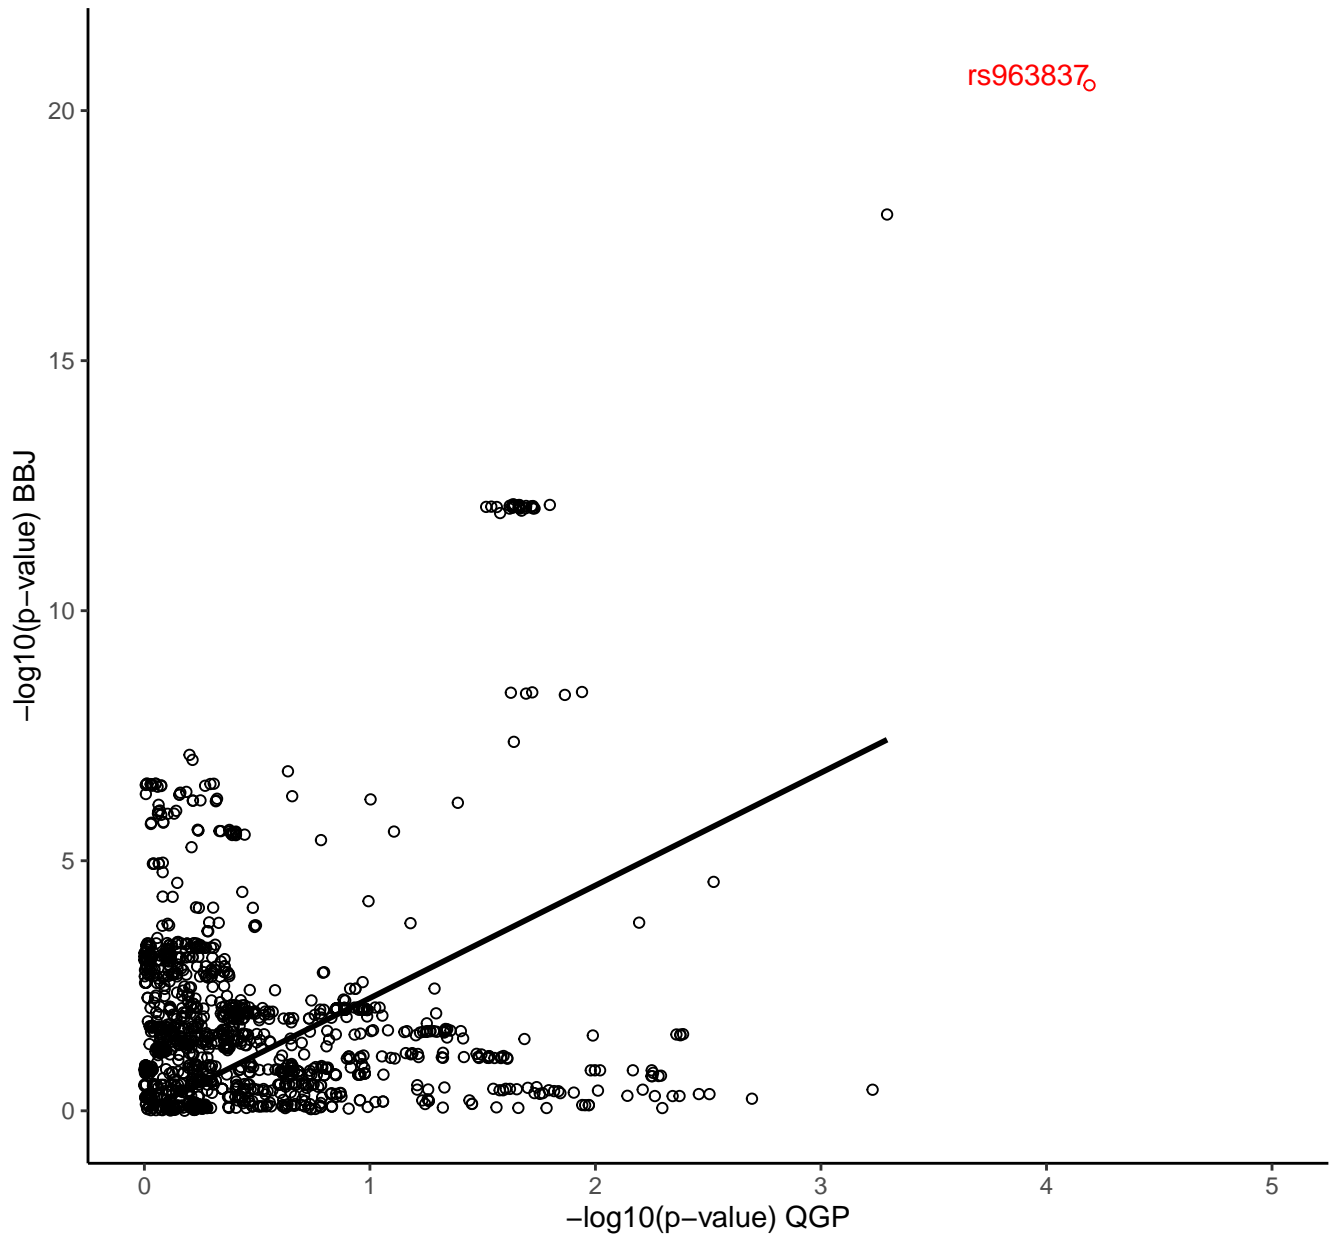

MCV rs62410539

nSNPs = 1247; H2: 0.0976; H3: 0.0216; H4: 0.881

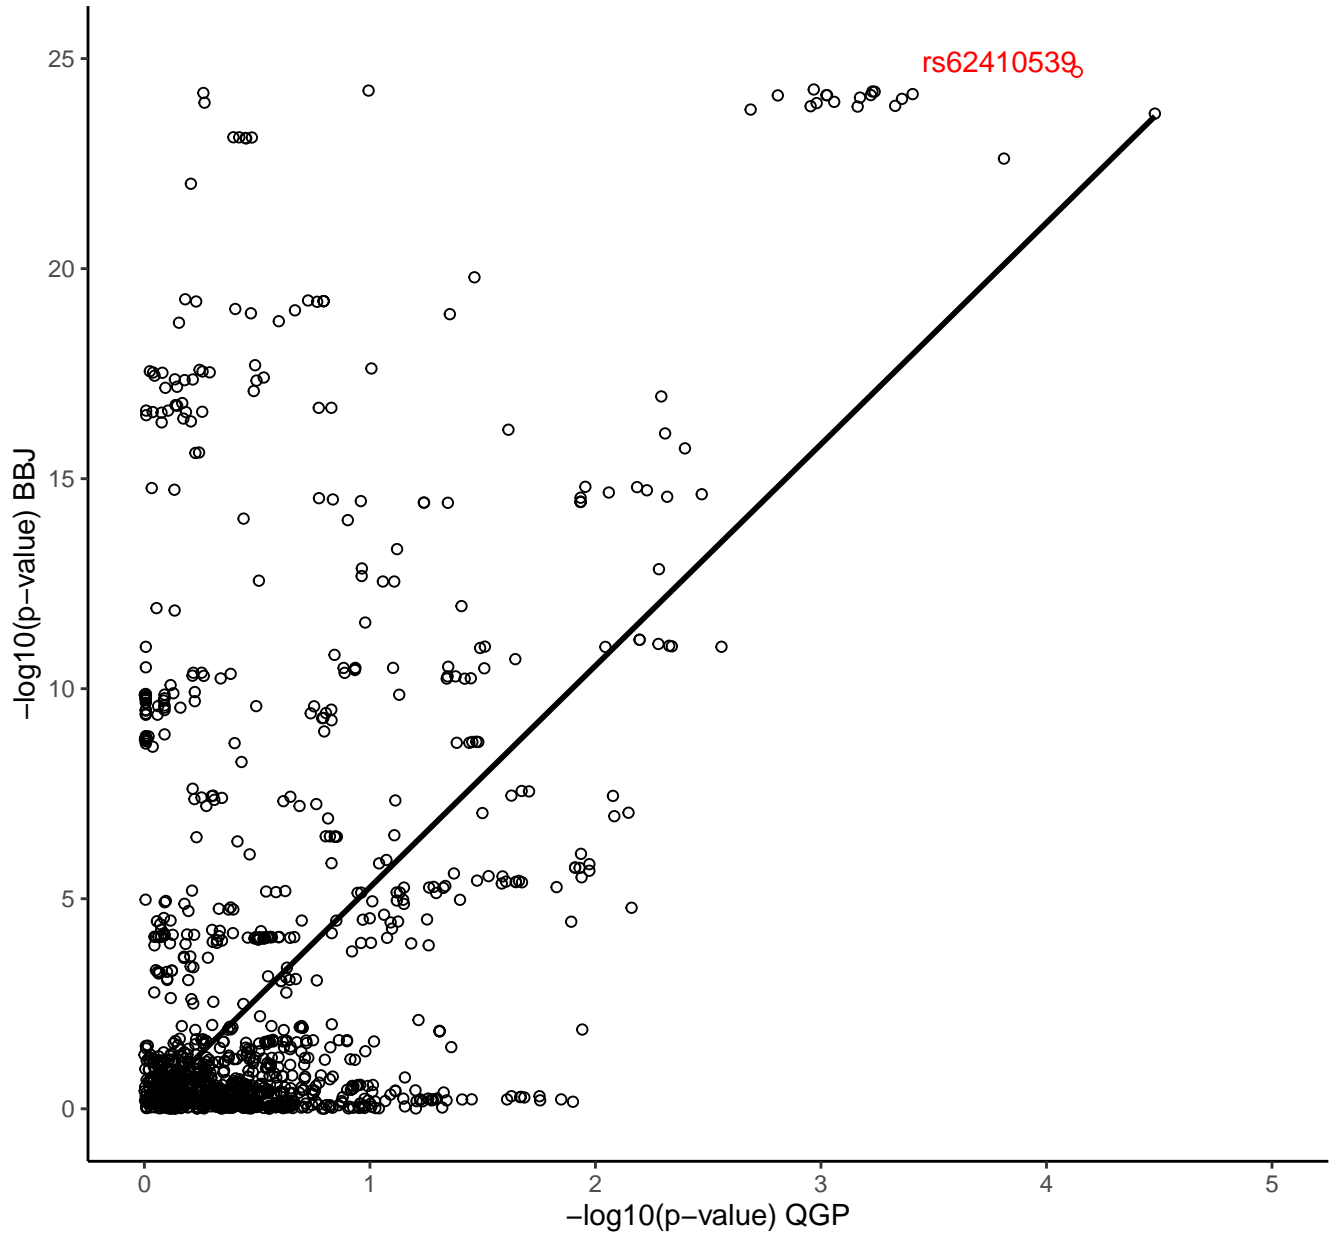



TP rs4985726

nSNPs = 1220; H2: 0.00905; H3: 0.0424; H4: 0.949

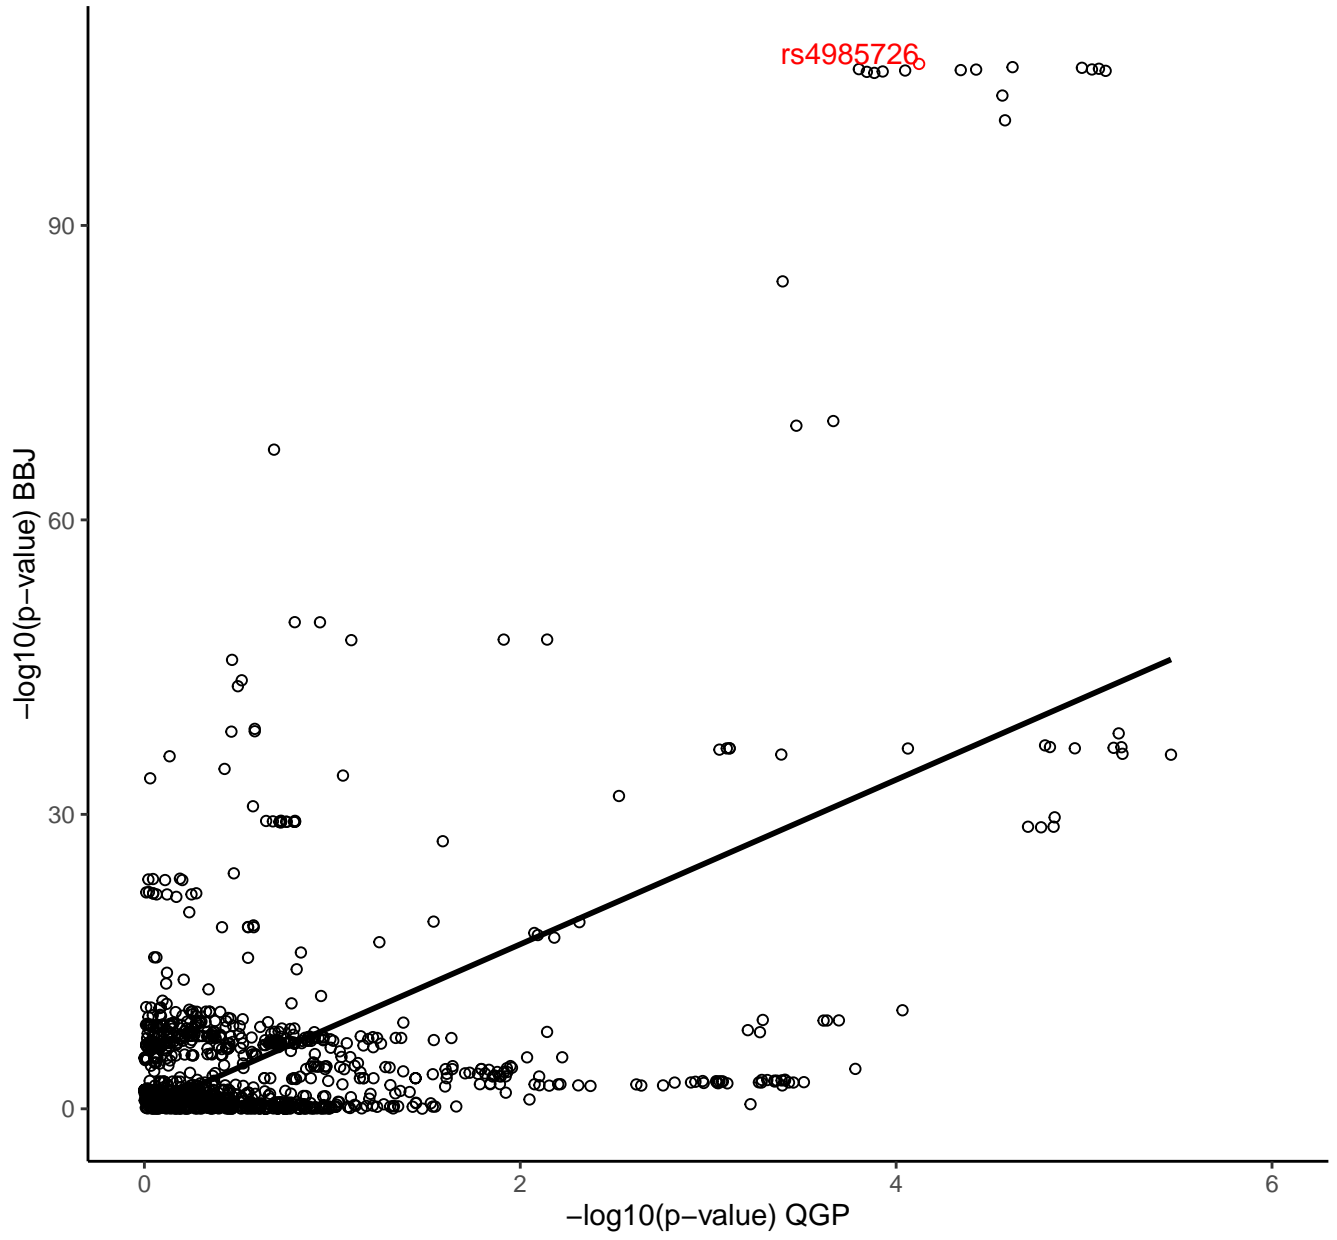

LDL-C rs769446

nSNPs = 1590; H2: 1.72e-20; H3: 1; H4: 2.18e-07

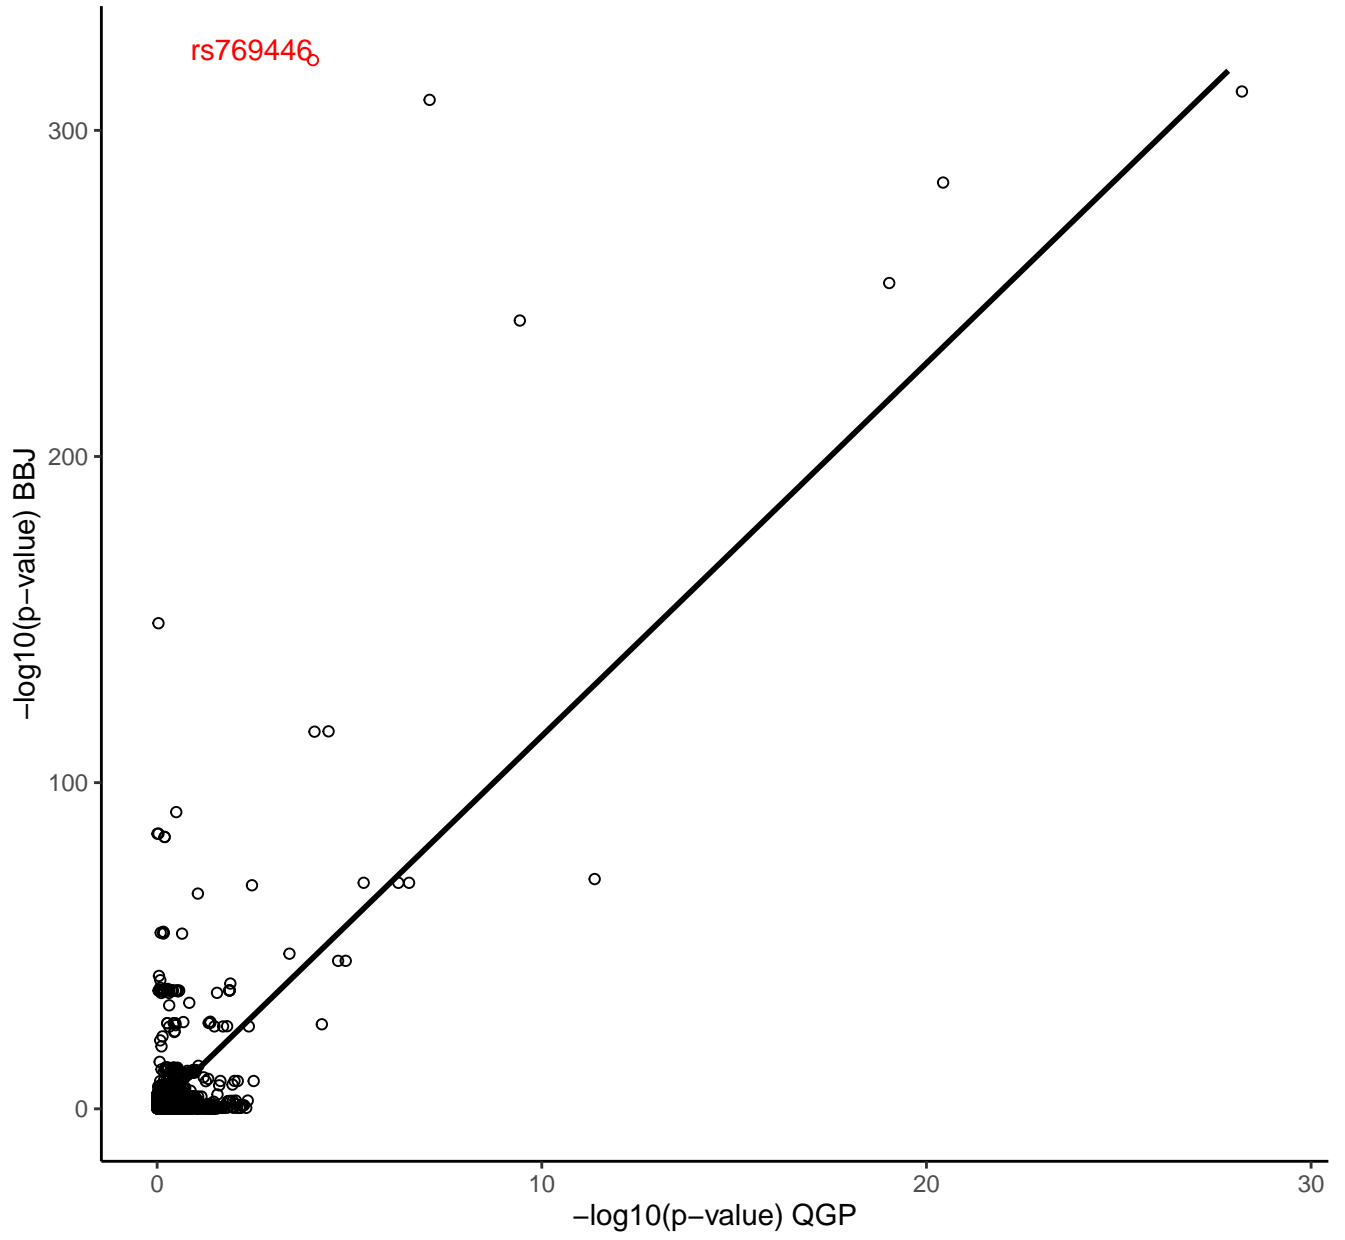

### WBC rs55771023

nSNPs = 720; H2: 0.0252; H3: 0.203; H4: 0.772

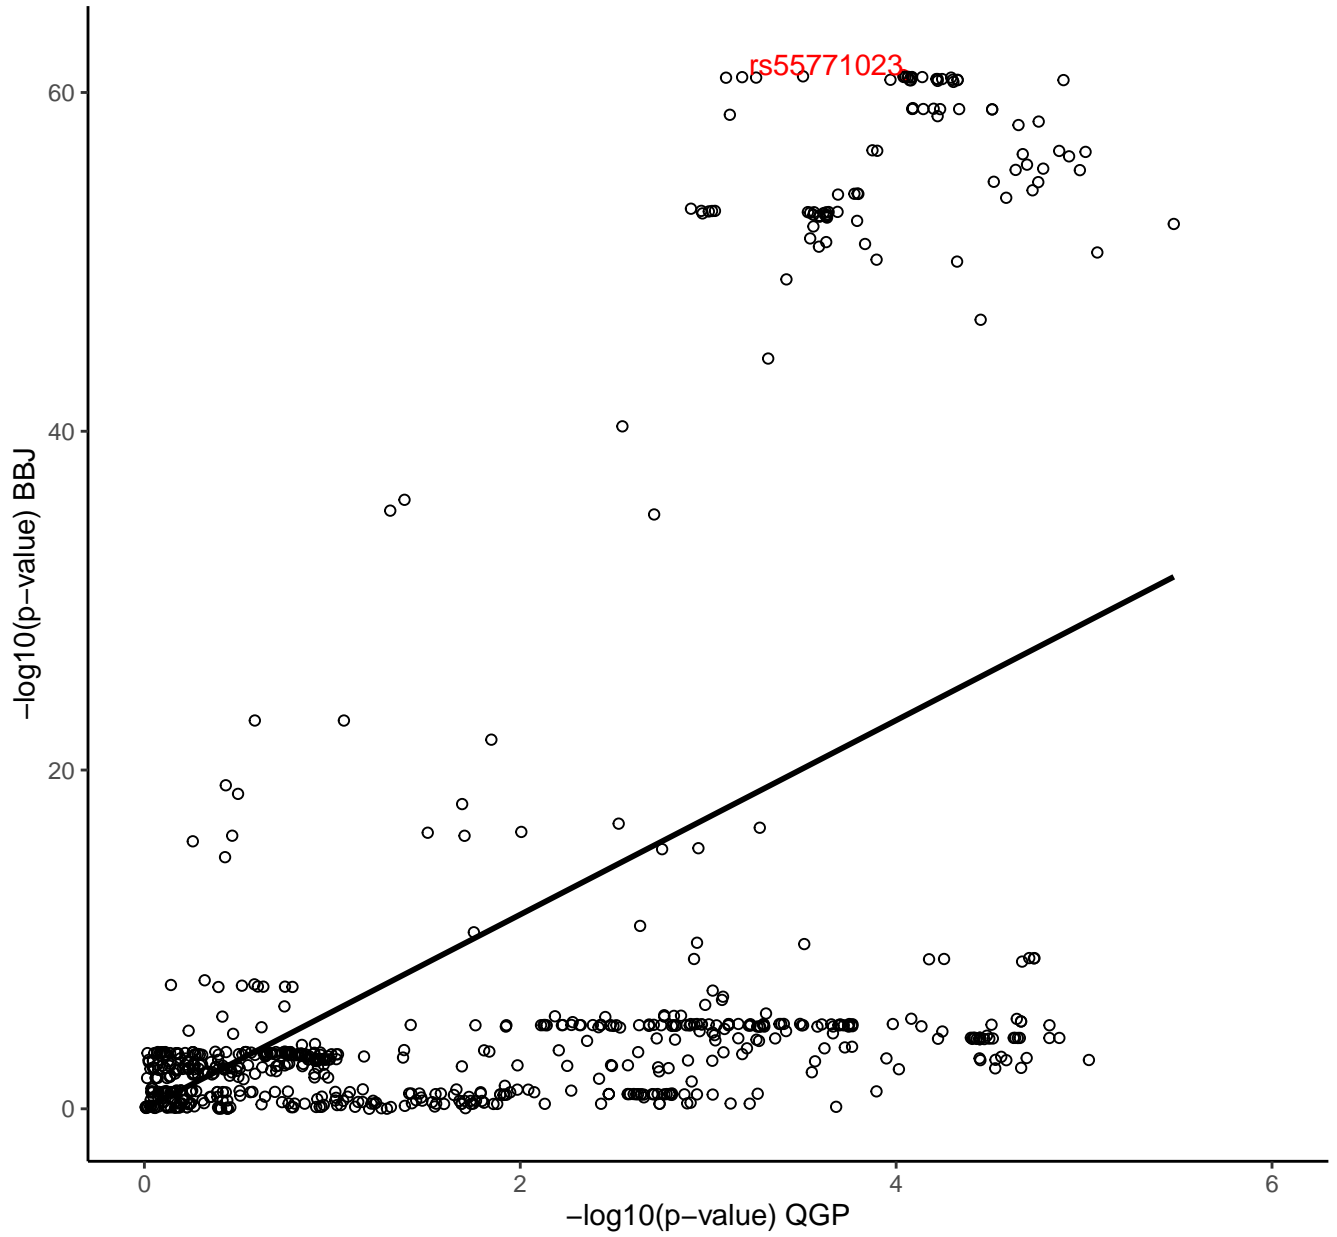

TP rs2280401

nSNPs = 1478; H2: 0.0154; H3: 0.302; H4: 0.683

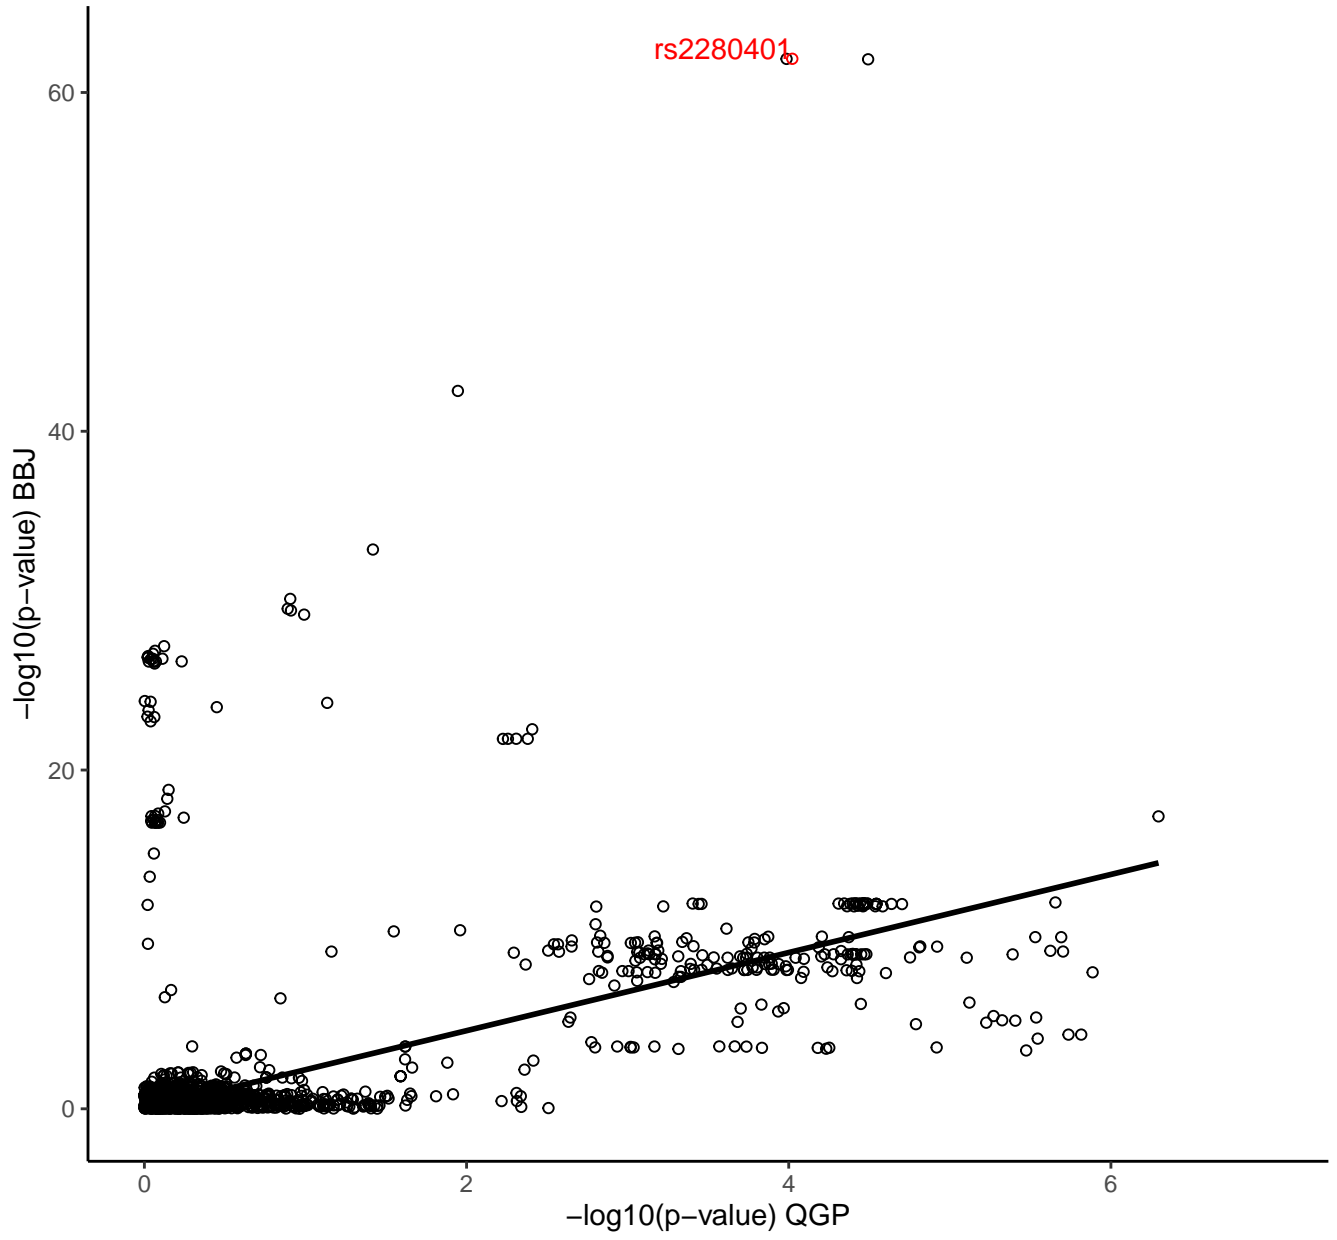

CK rs76854597

nSNPs = 2022; H2: 0.0375; H3: 0.0964; H4: 0.866

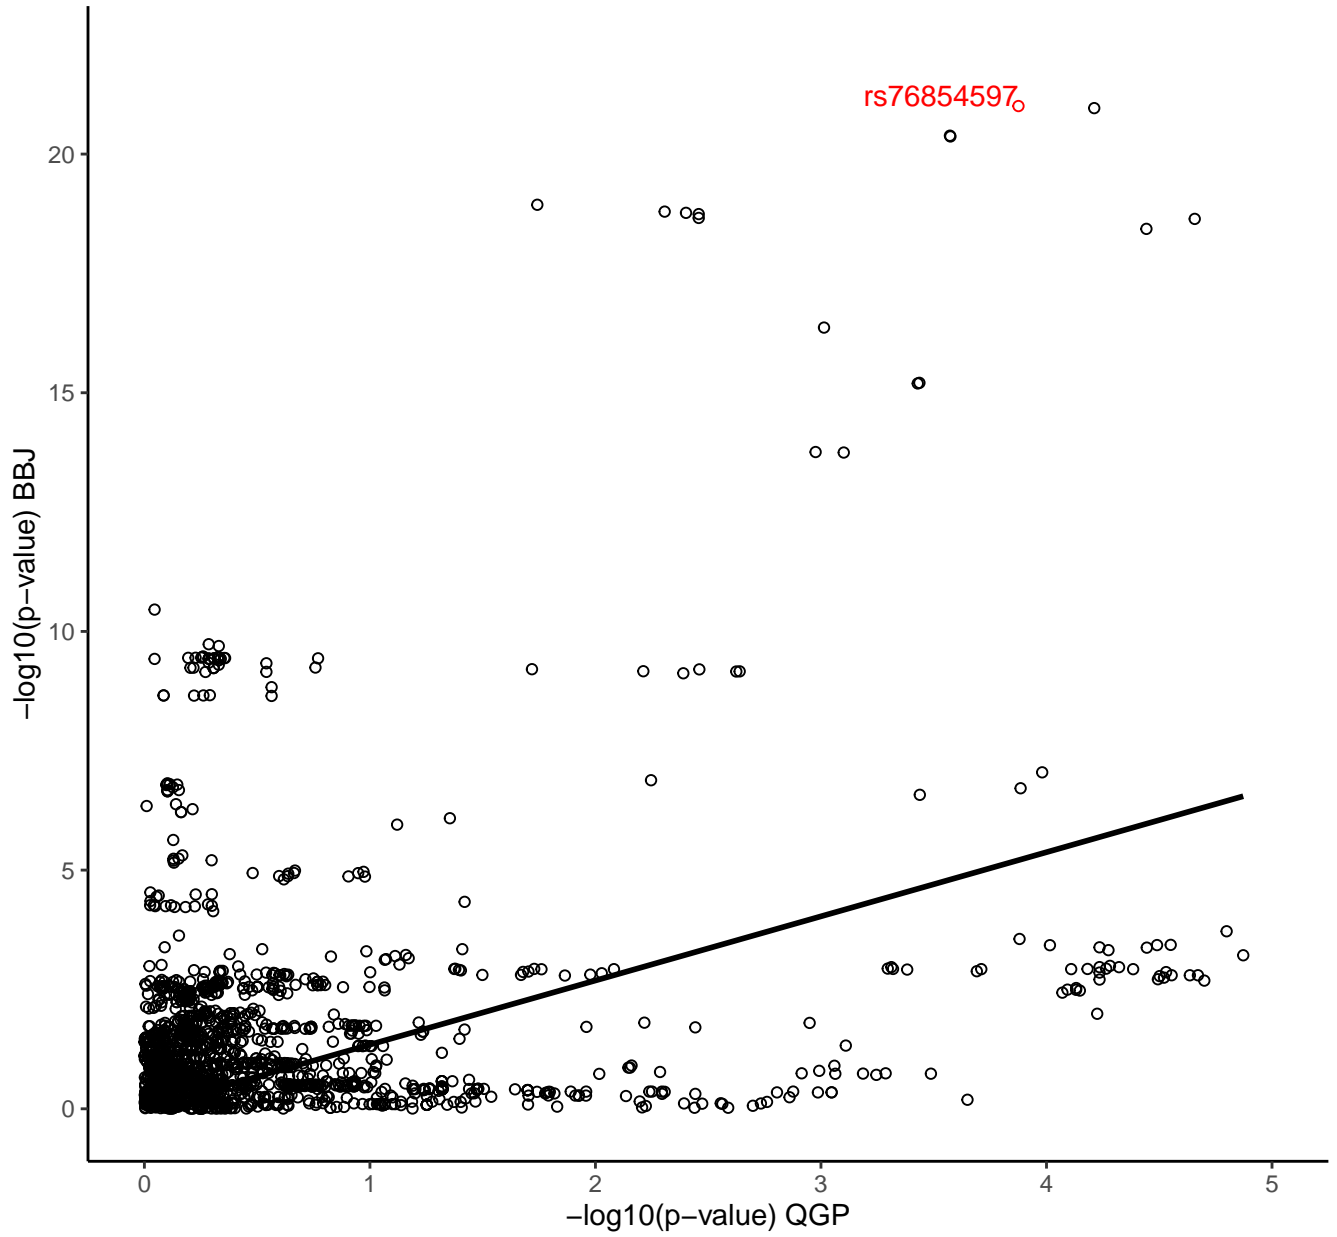

### HDL-C rs429358

nSNPs = 1585; H2: 0.065; H3: 0.00644; H4: 0.929

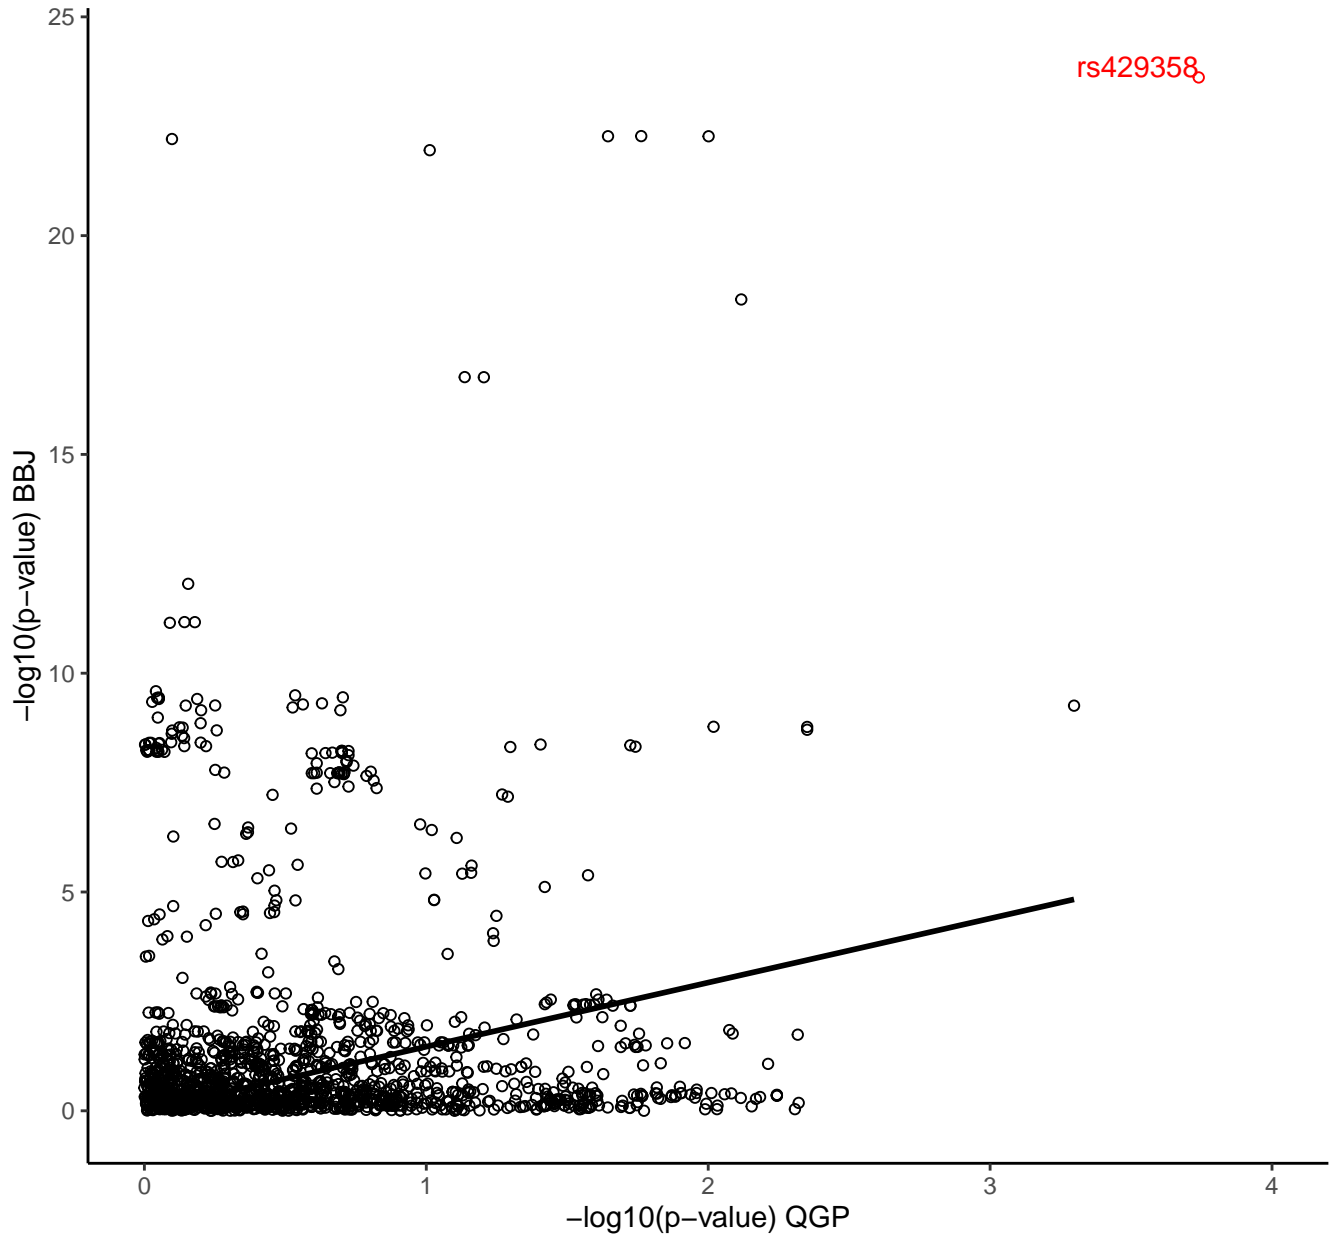

### HDL-C rs1883025

nSNPs = 2171; H2: 0.0559; H3: 0.0745; H4: 0.87

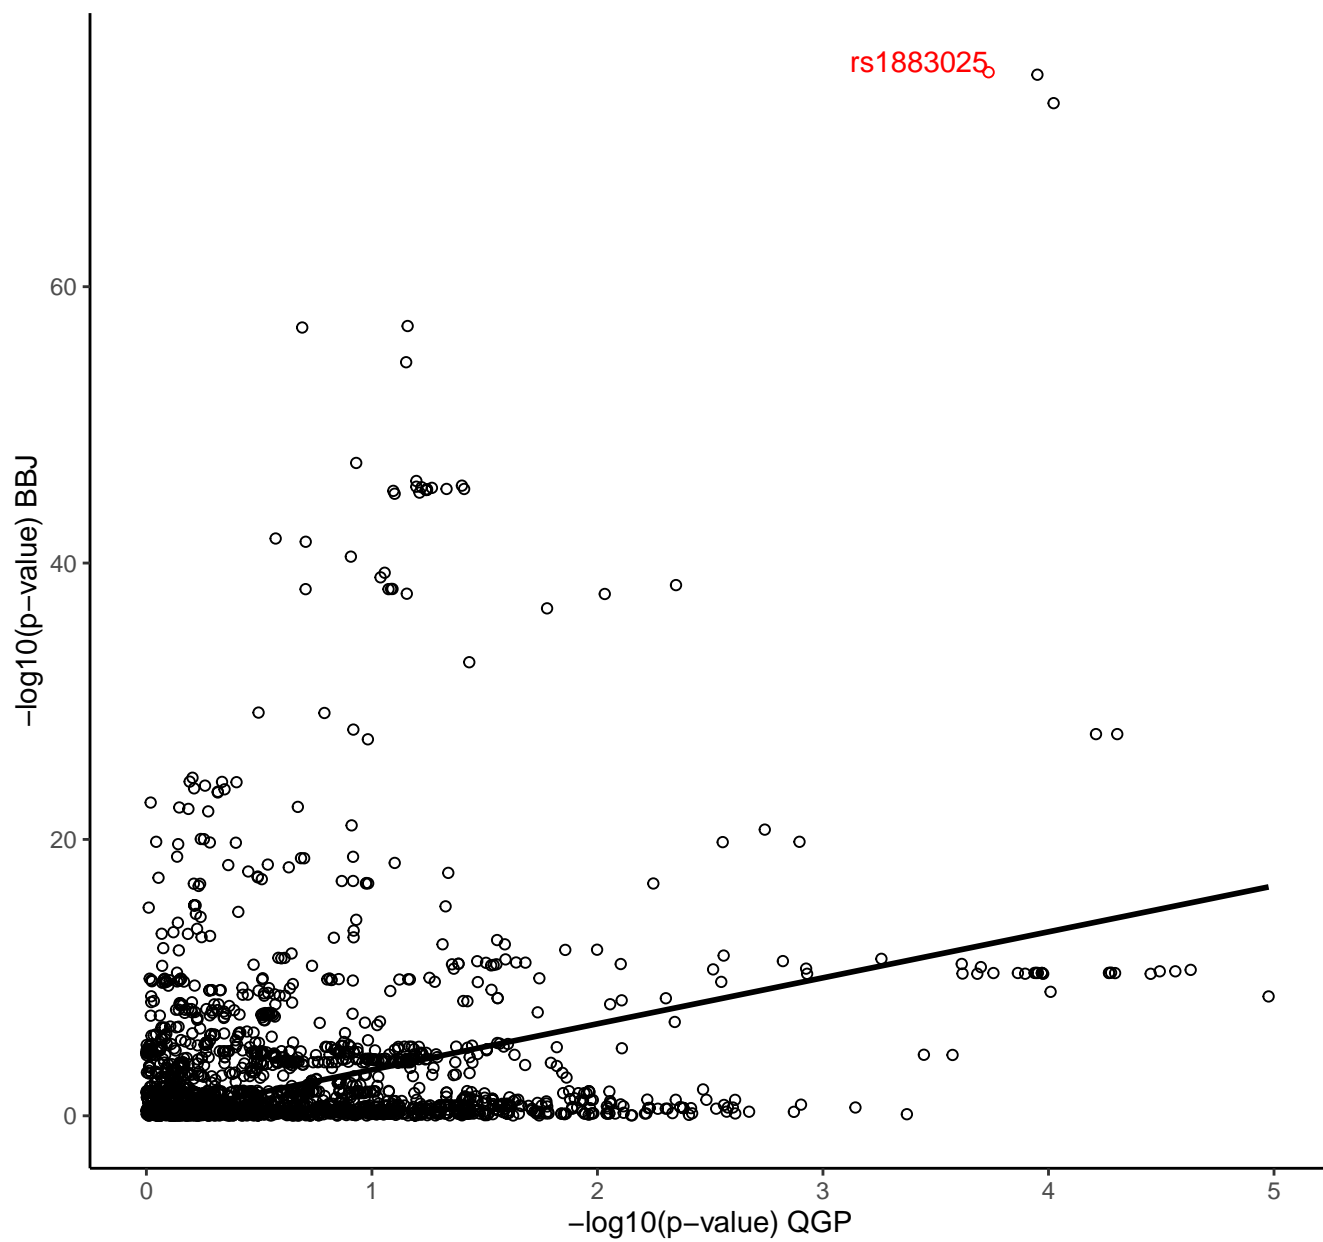

Plt rs1896995

nSNPs = 1380; H2: 0.0467; H3: 0.0954; H4: 0.858

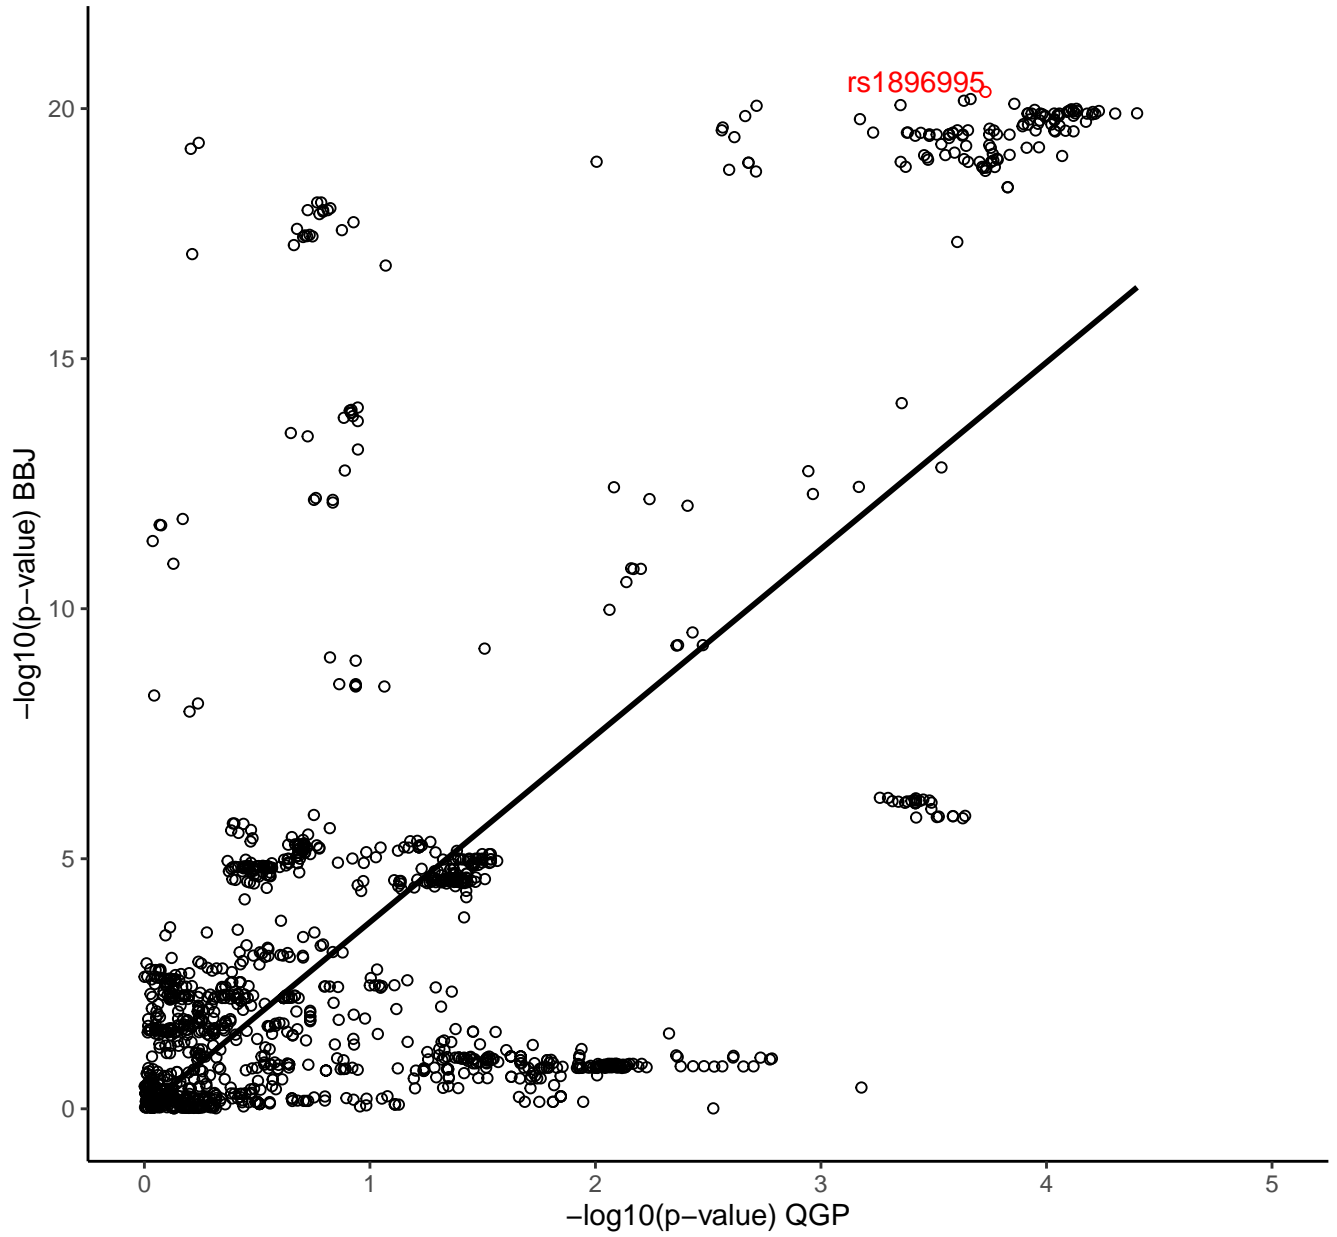



### GGT rs1260326

nSNPs = 708; H2: 0.139; H3: 0.0279; H4: 0.834

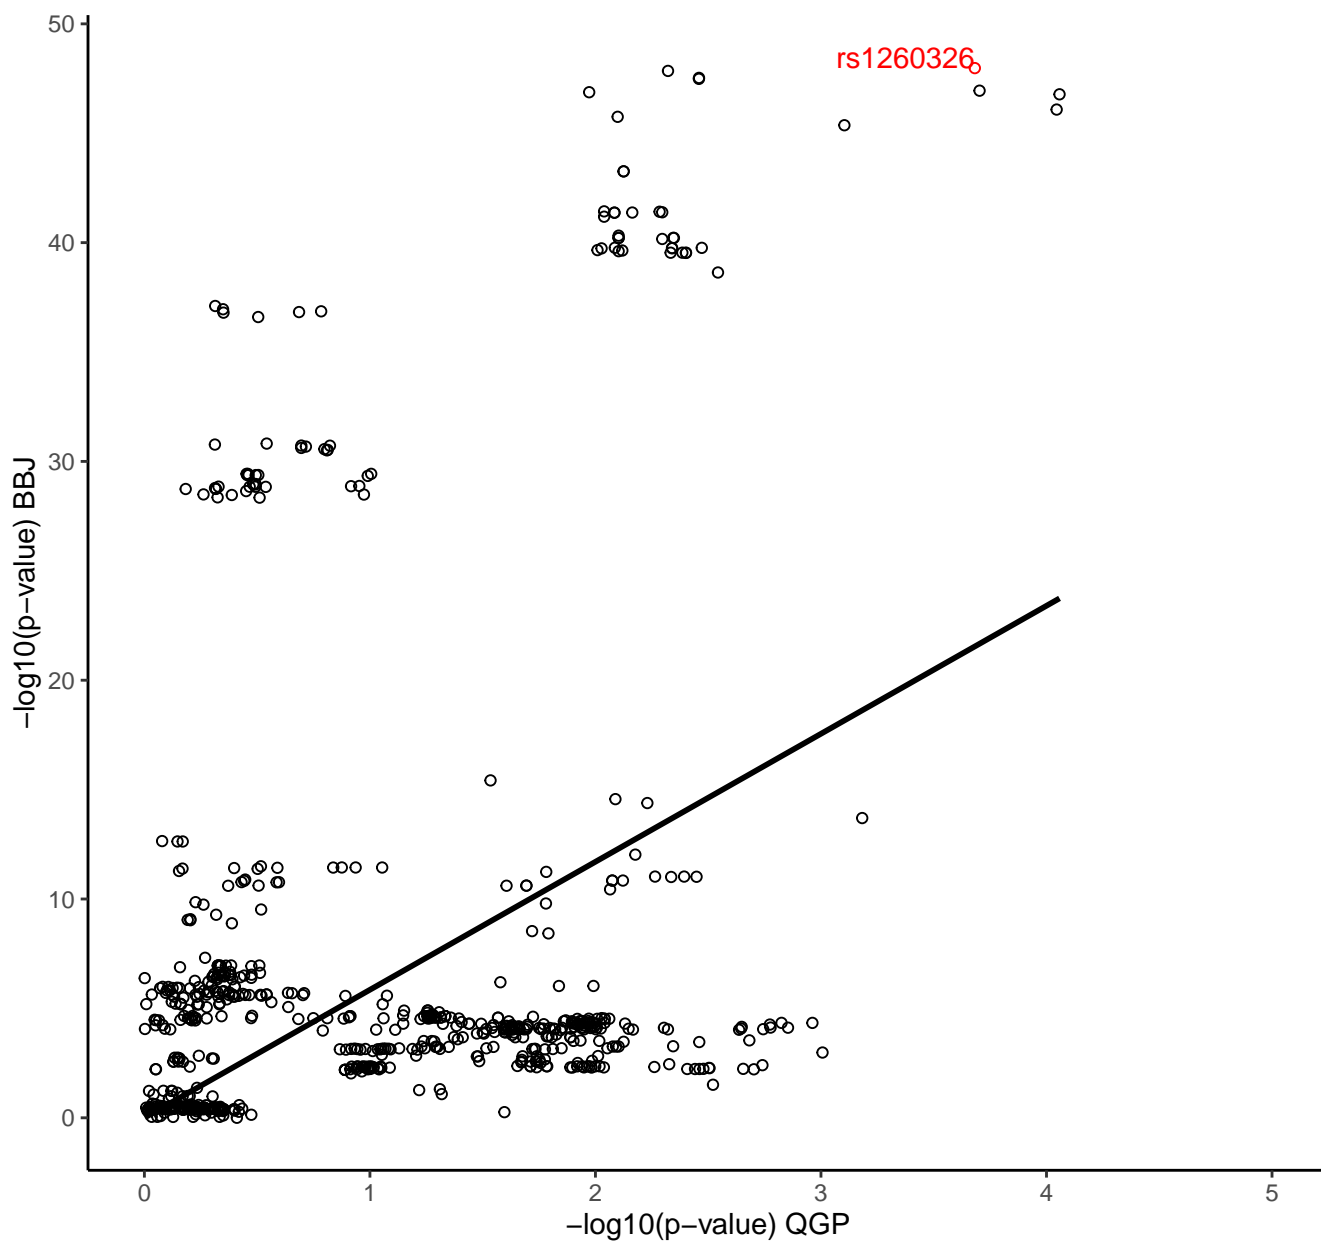

Plt rs385893

nSNPs = 2492; H2: 0.0836; H3: 0.0256; H4: 0.891

rs385893

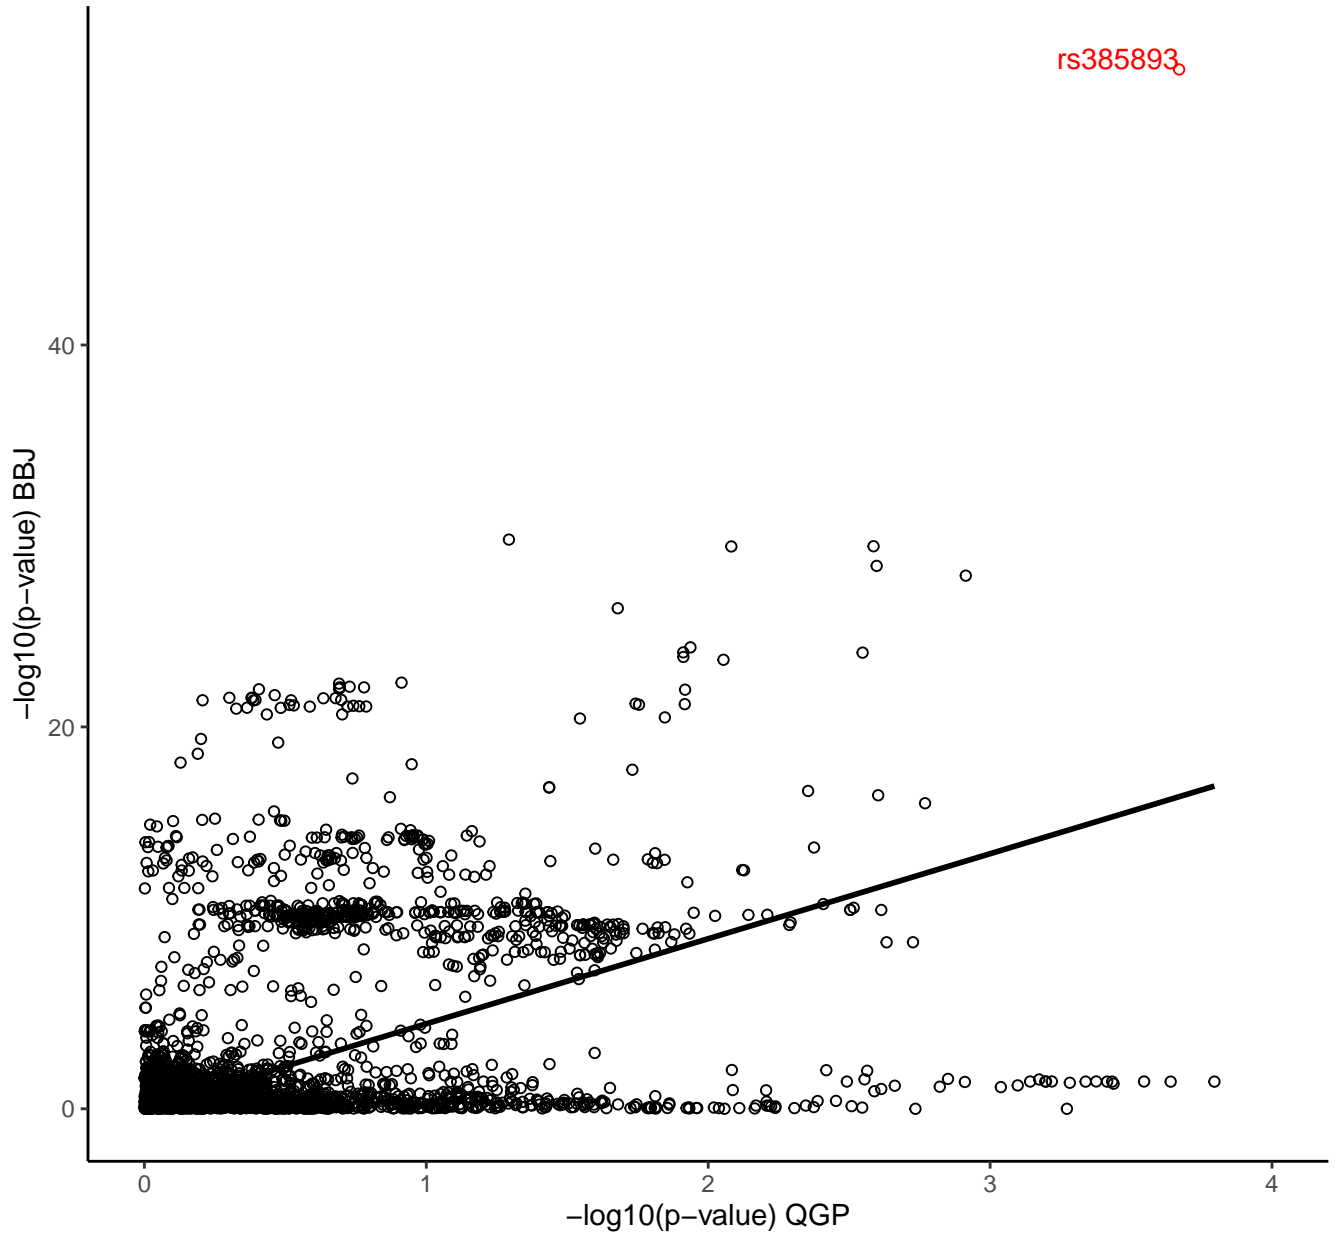

TG rs35529421

nSNPs = 1648; H2: 0.0343; H3: 0.231; H4: 0.734

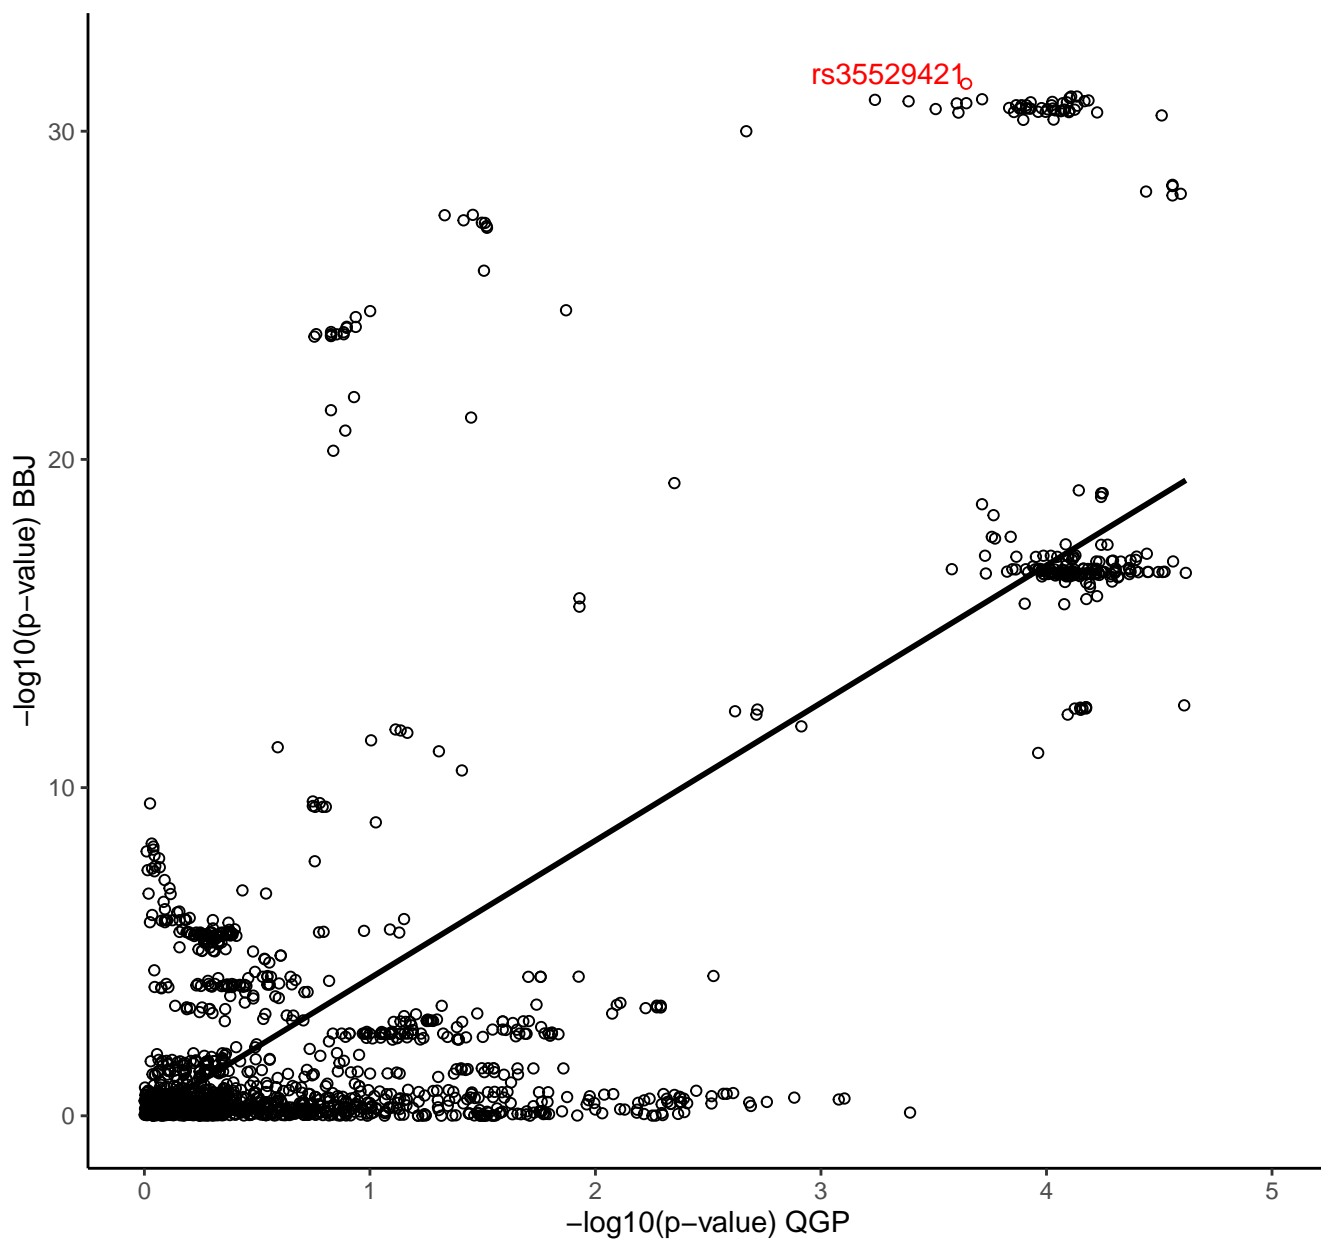

TC rs2738464

nSNPs = 1221; H2: 0.00718; H3: 0.914; H4: 0.0789

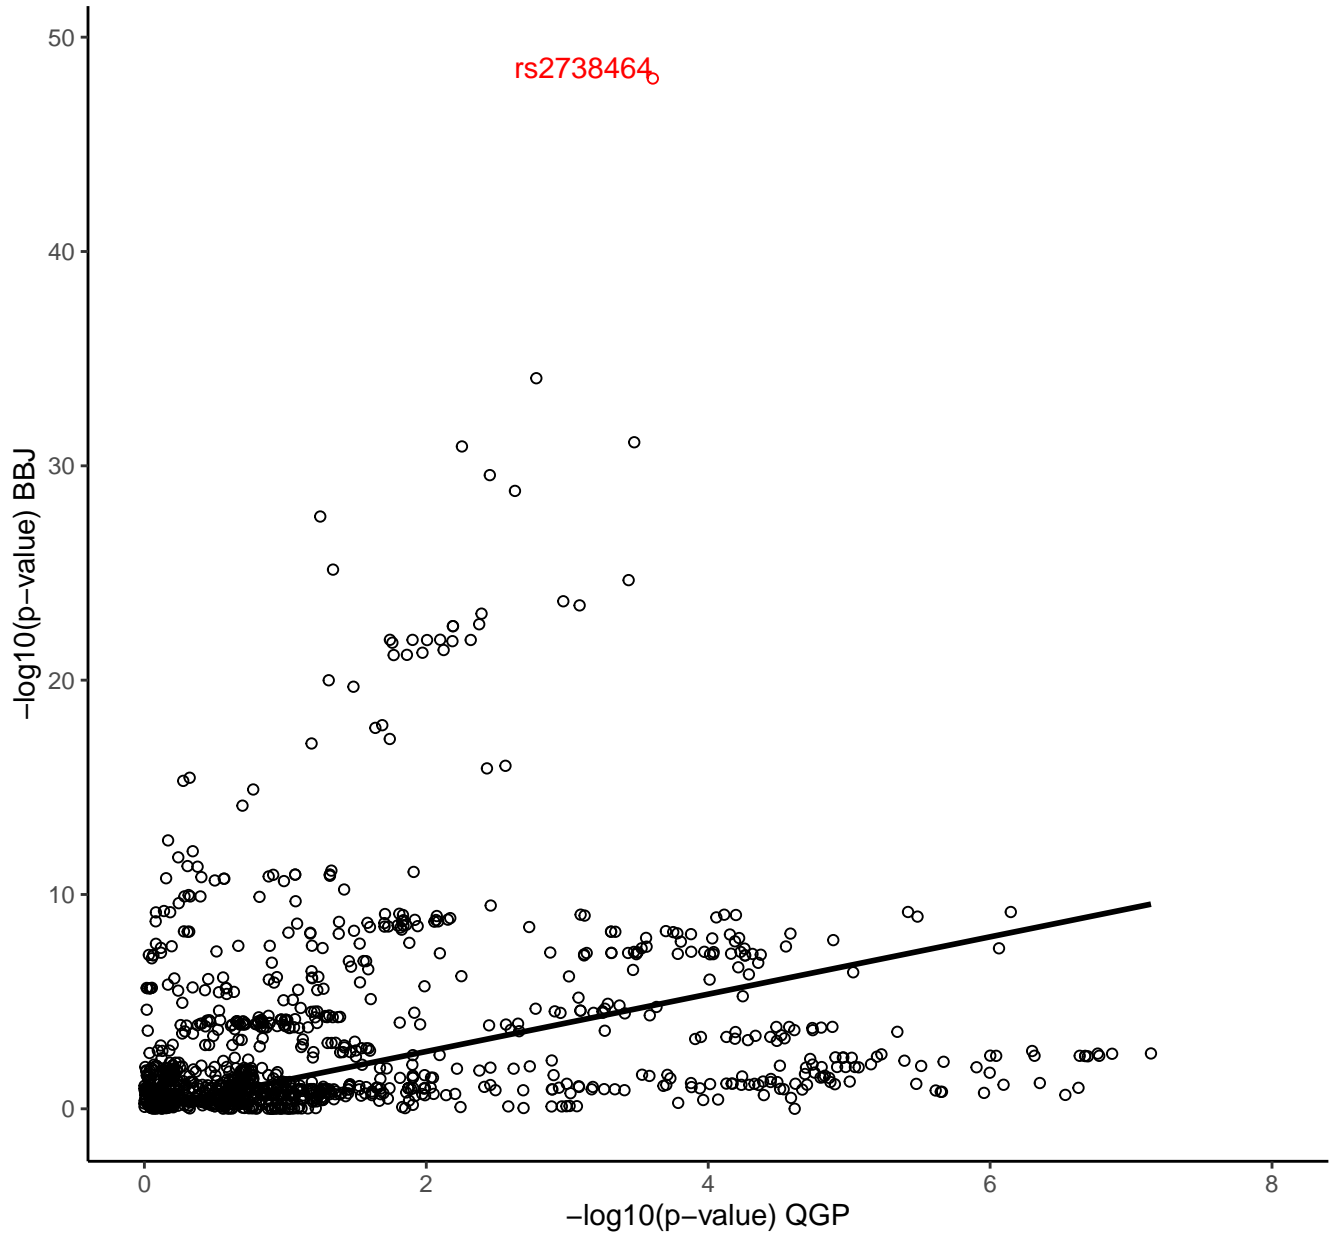

MCV rs6592965

nSNPs = 2070; H2: 0.117; H3: 0.0163; H4: 0.867

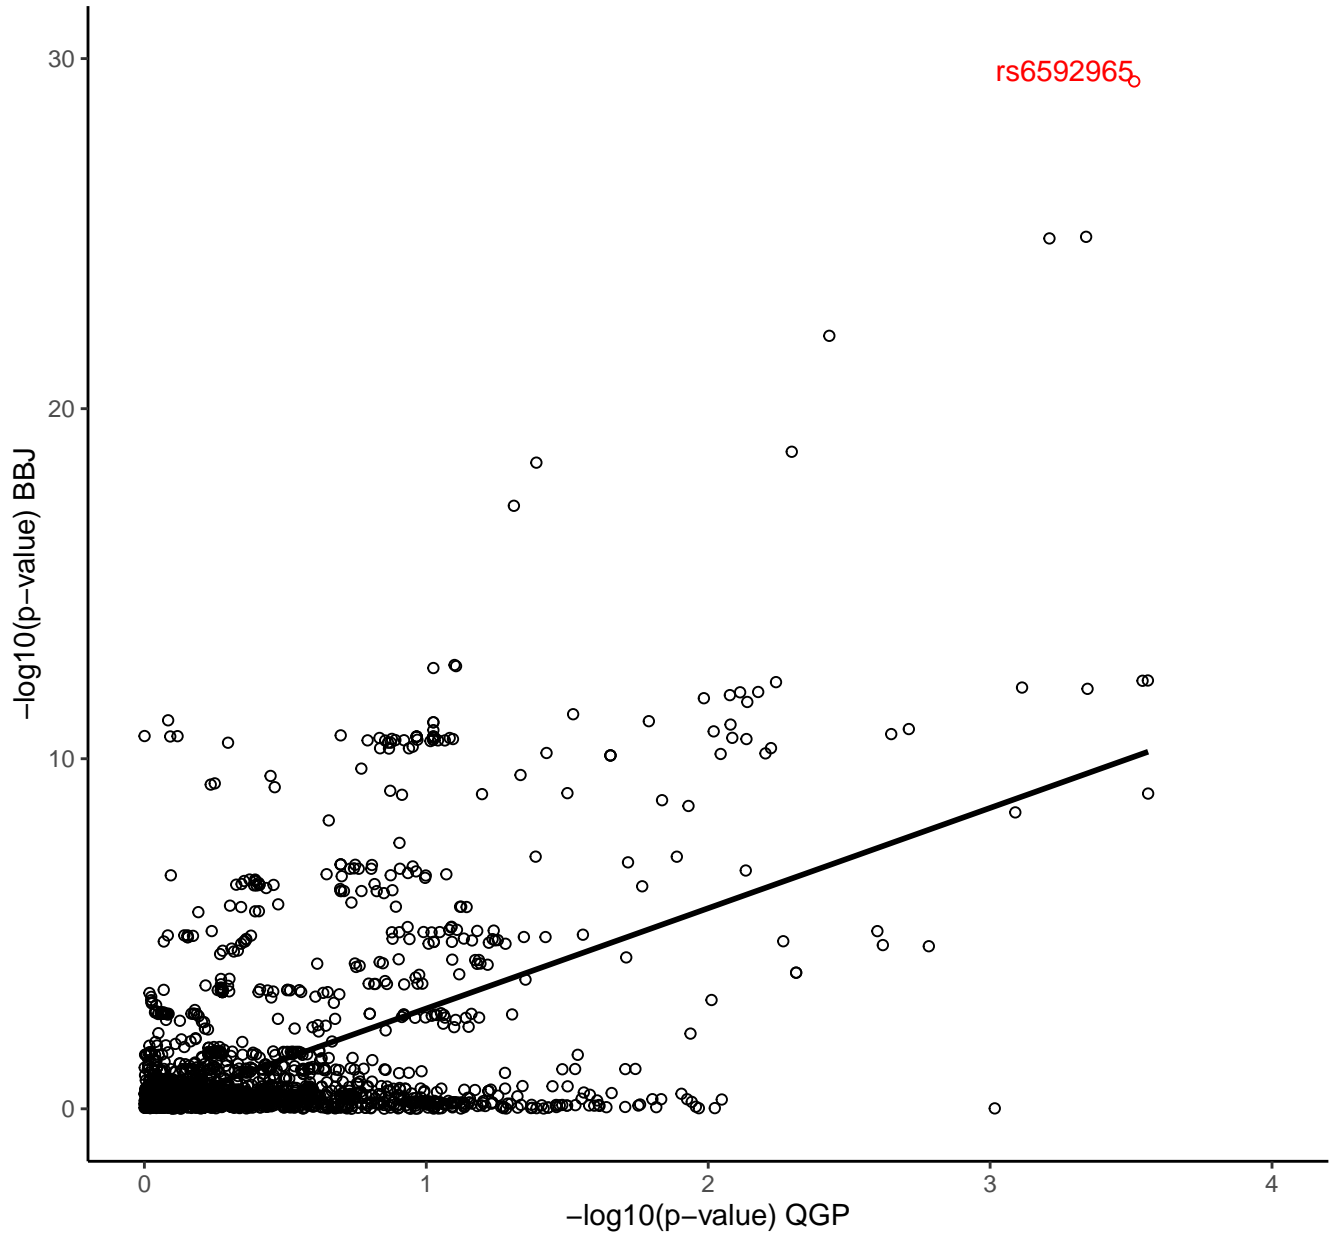

Ca rs13301969

nSNPs = 1631; H2: 0.72; H3: 0.0822; H4: 0.197

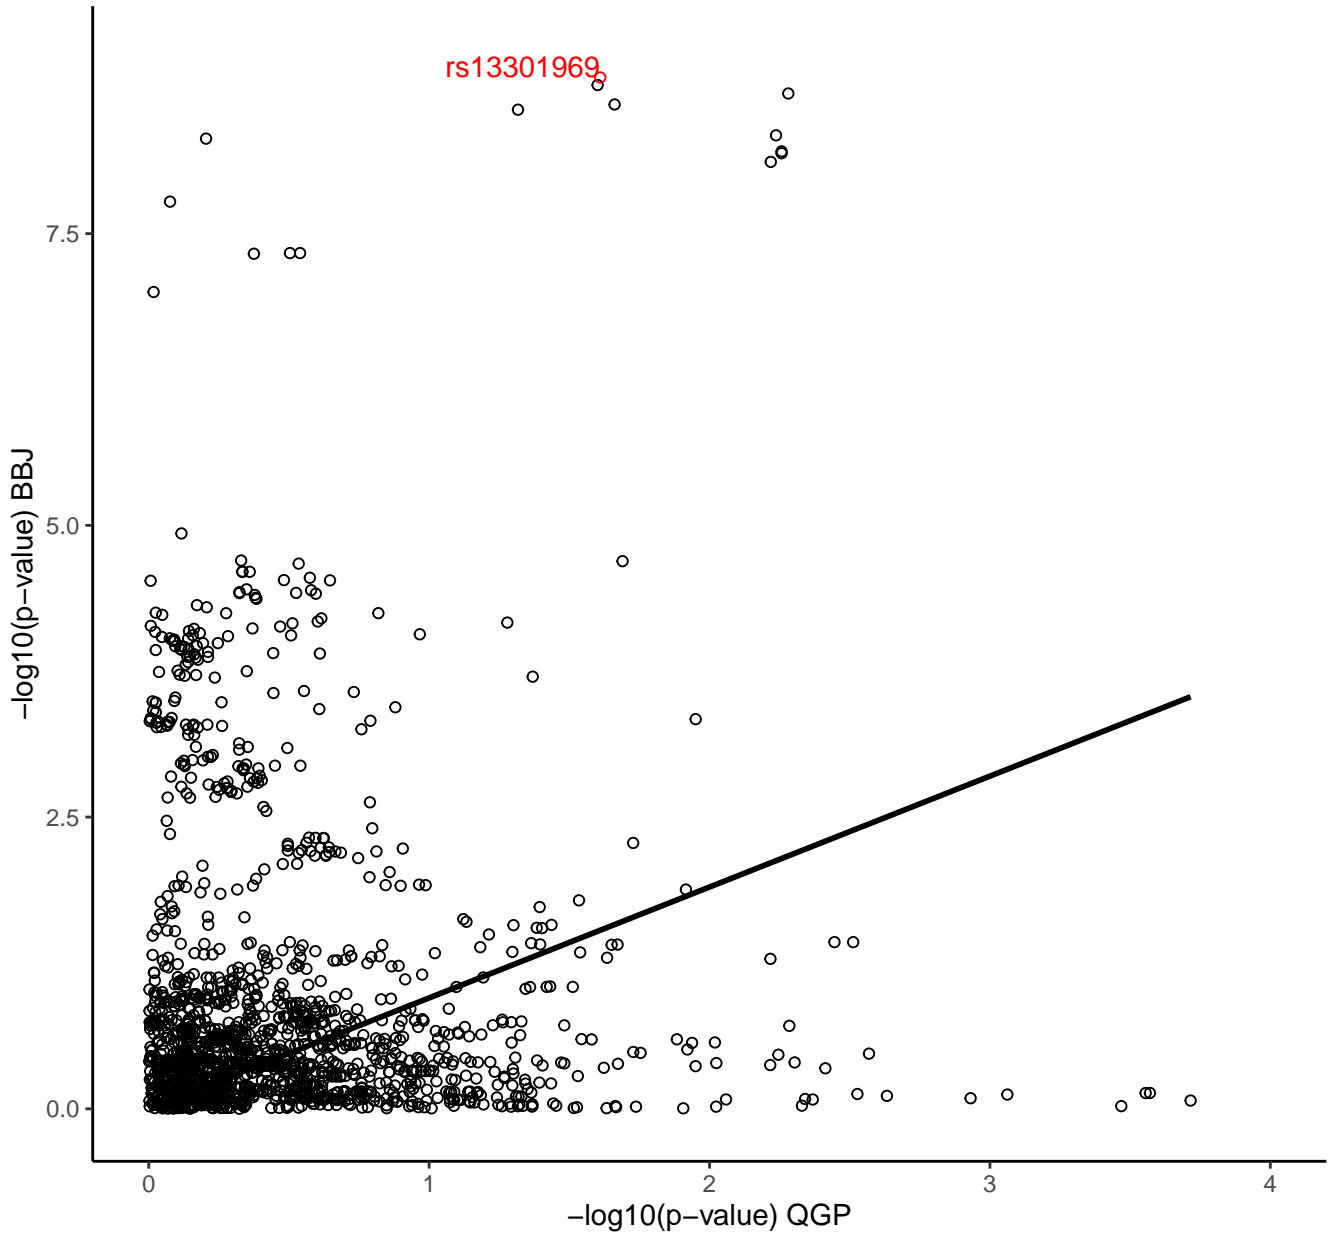

Ht rs366684

nSNPs = 1788; H2: 0.0793; H3: 0.0689; H4: 0.852

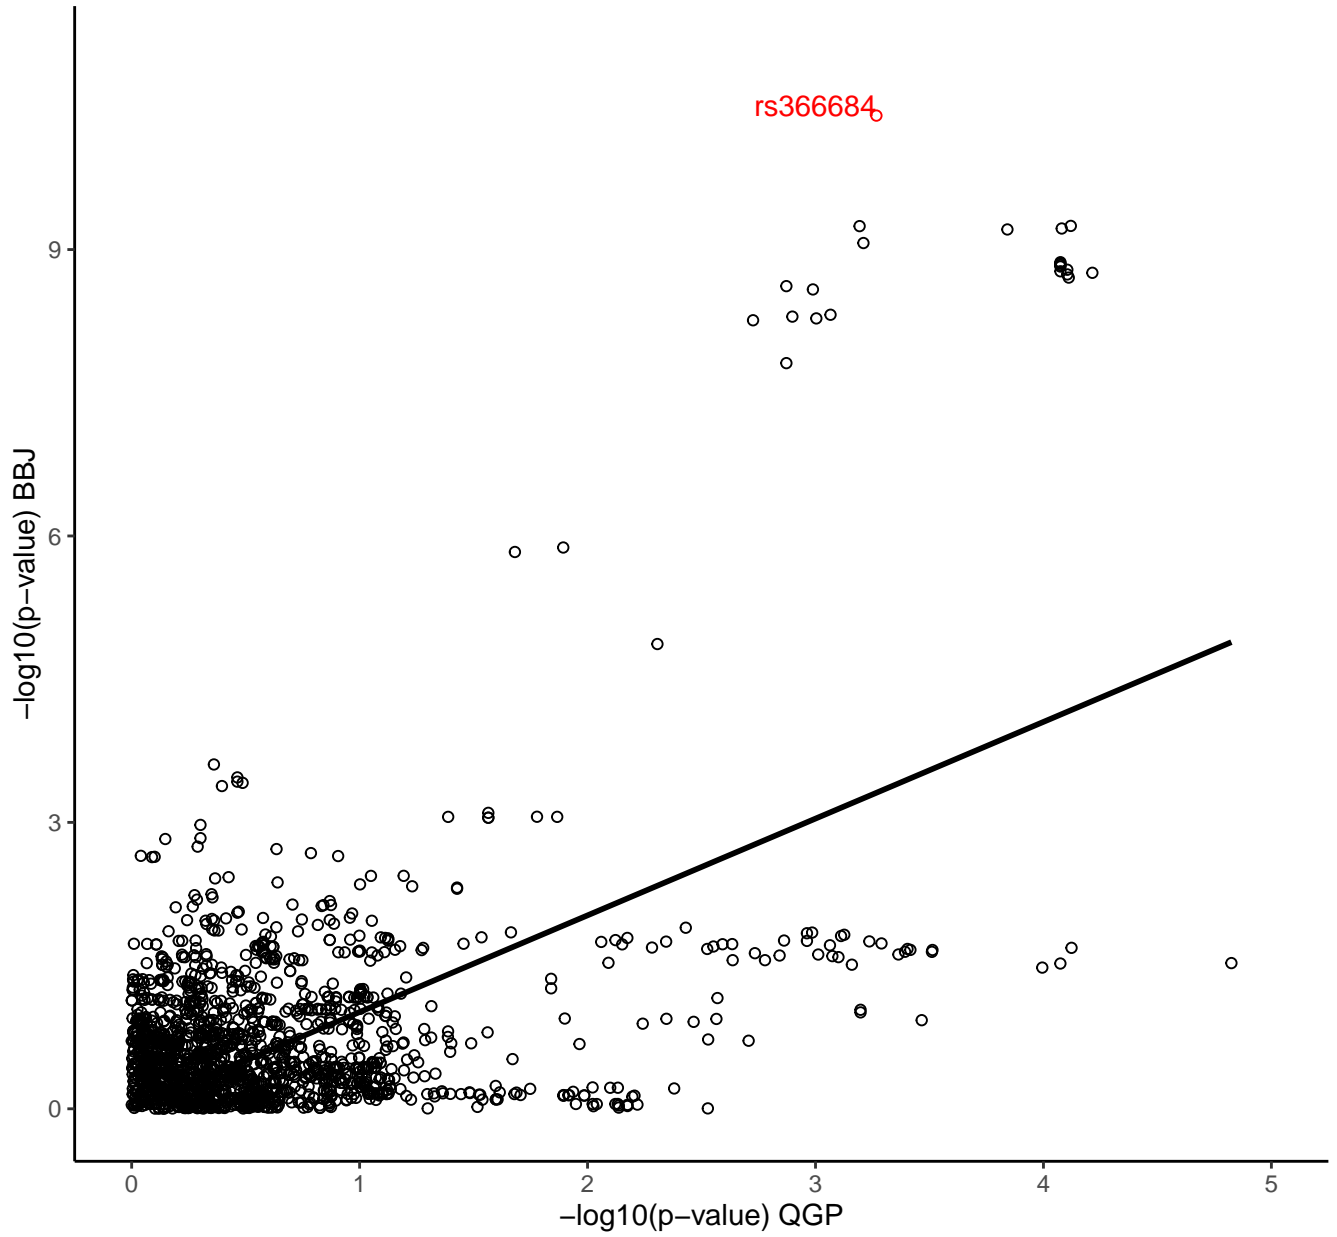

MCH rs855791

nSNPs = 1770; H2: 0.187; H3: 0.0206; H4: 0.793

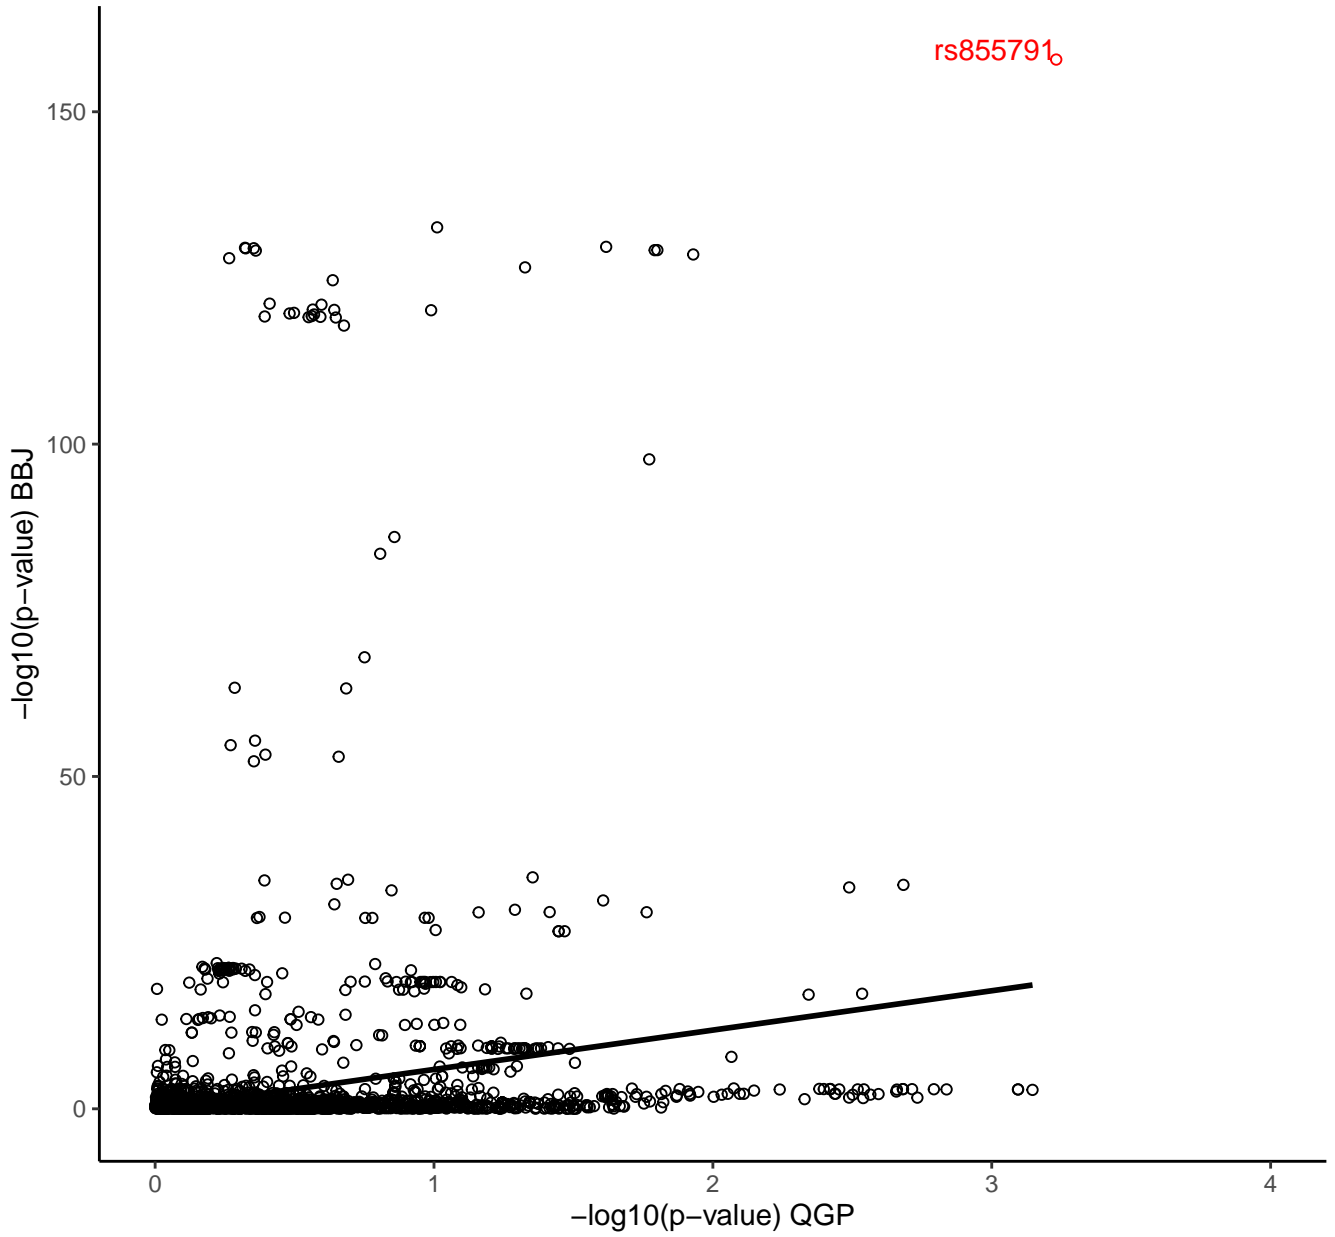



Plt rs210143

nSNPs = 3024; H2: 0.171; H3: 0.0424; H4: 0.787

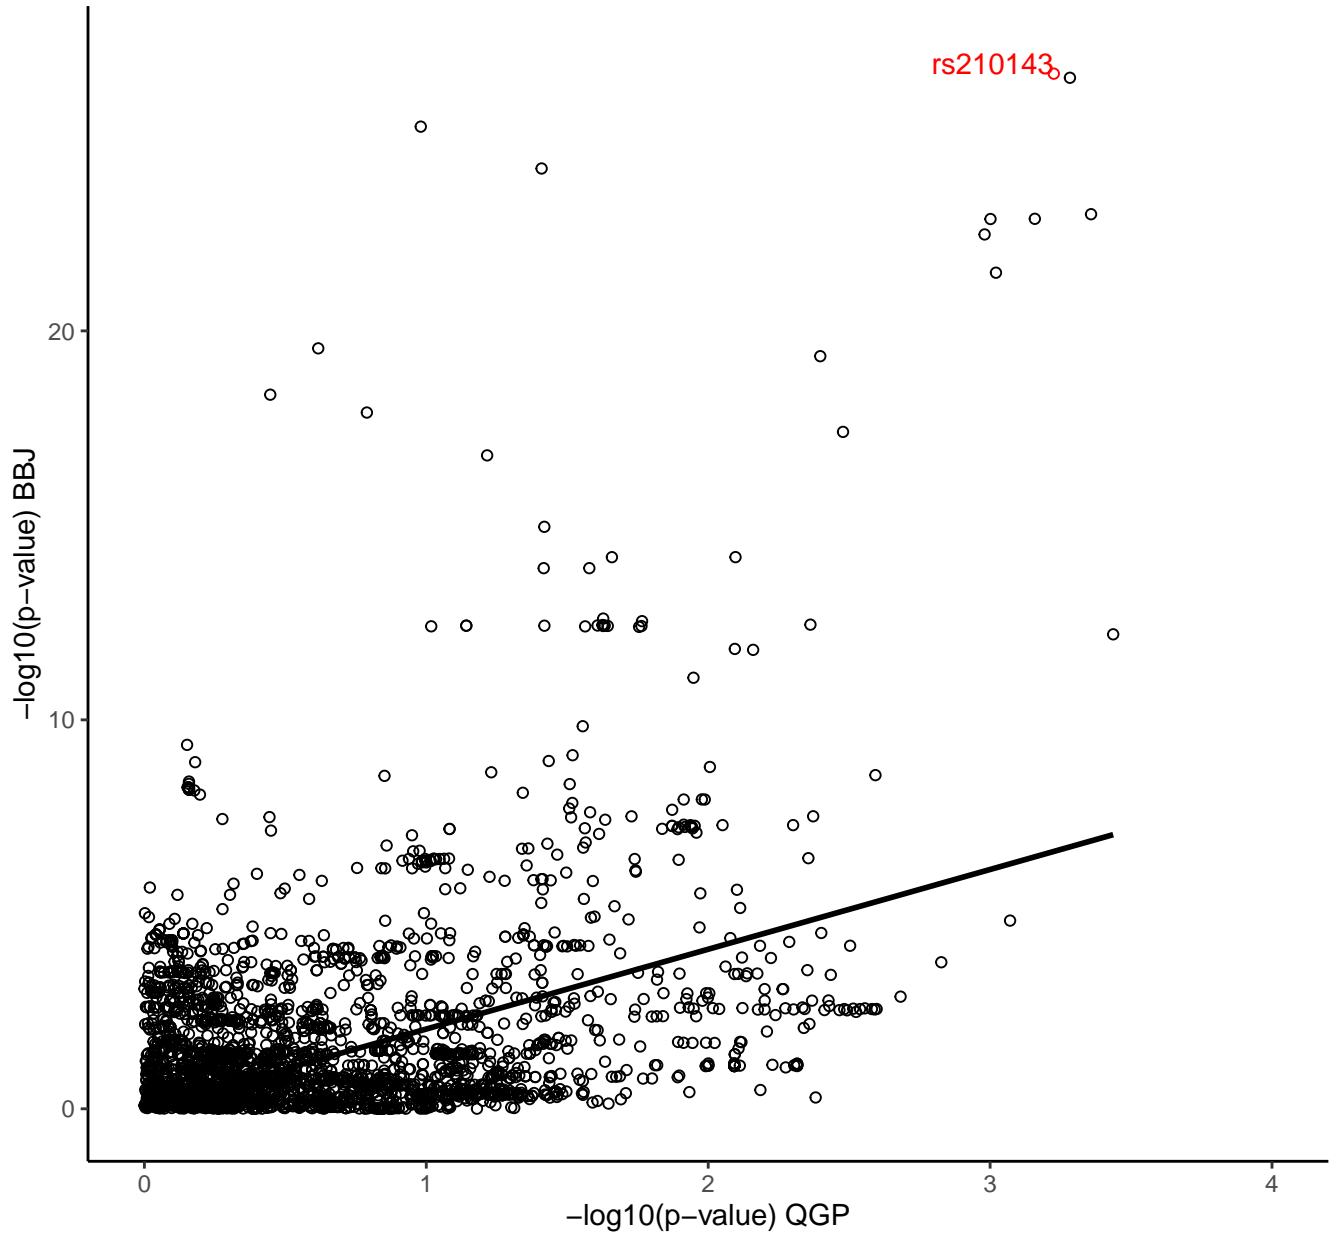

sCr rs142647267

nSNPs = 2148; H2: 0.16; H3: 0.0591; H4: 0.781

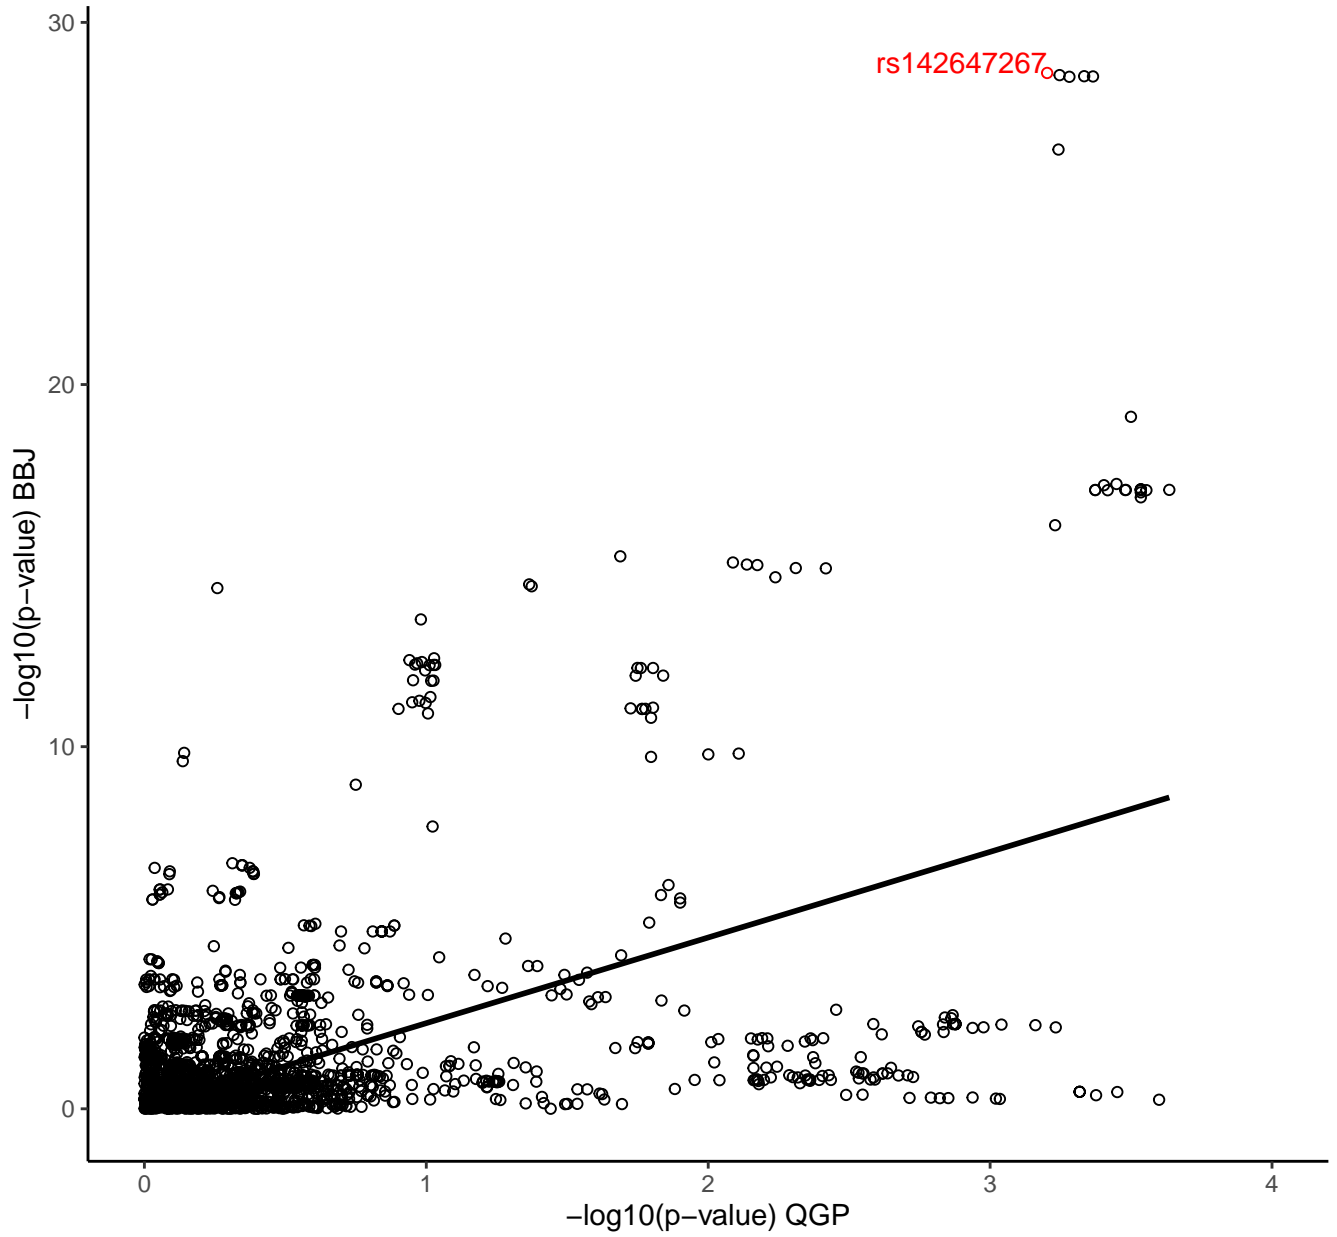

Alb rs7212936

nSNPs = 1735; H2: 0.00464; H3: 0.0744; H4: 0.921

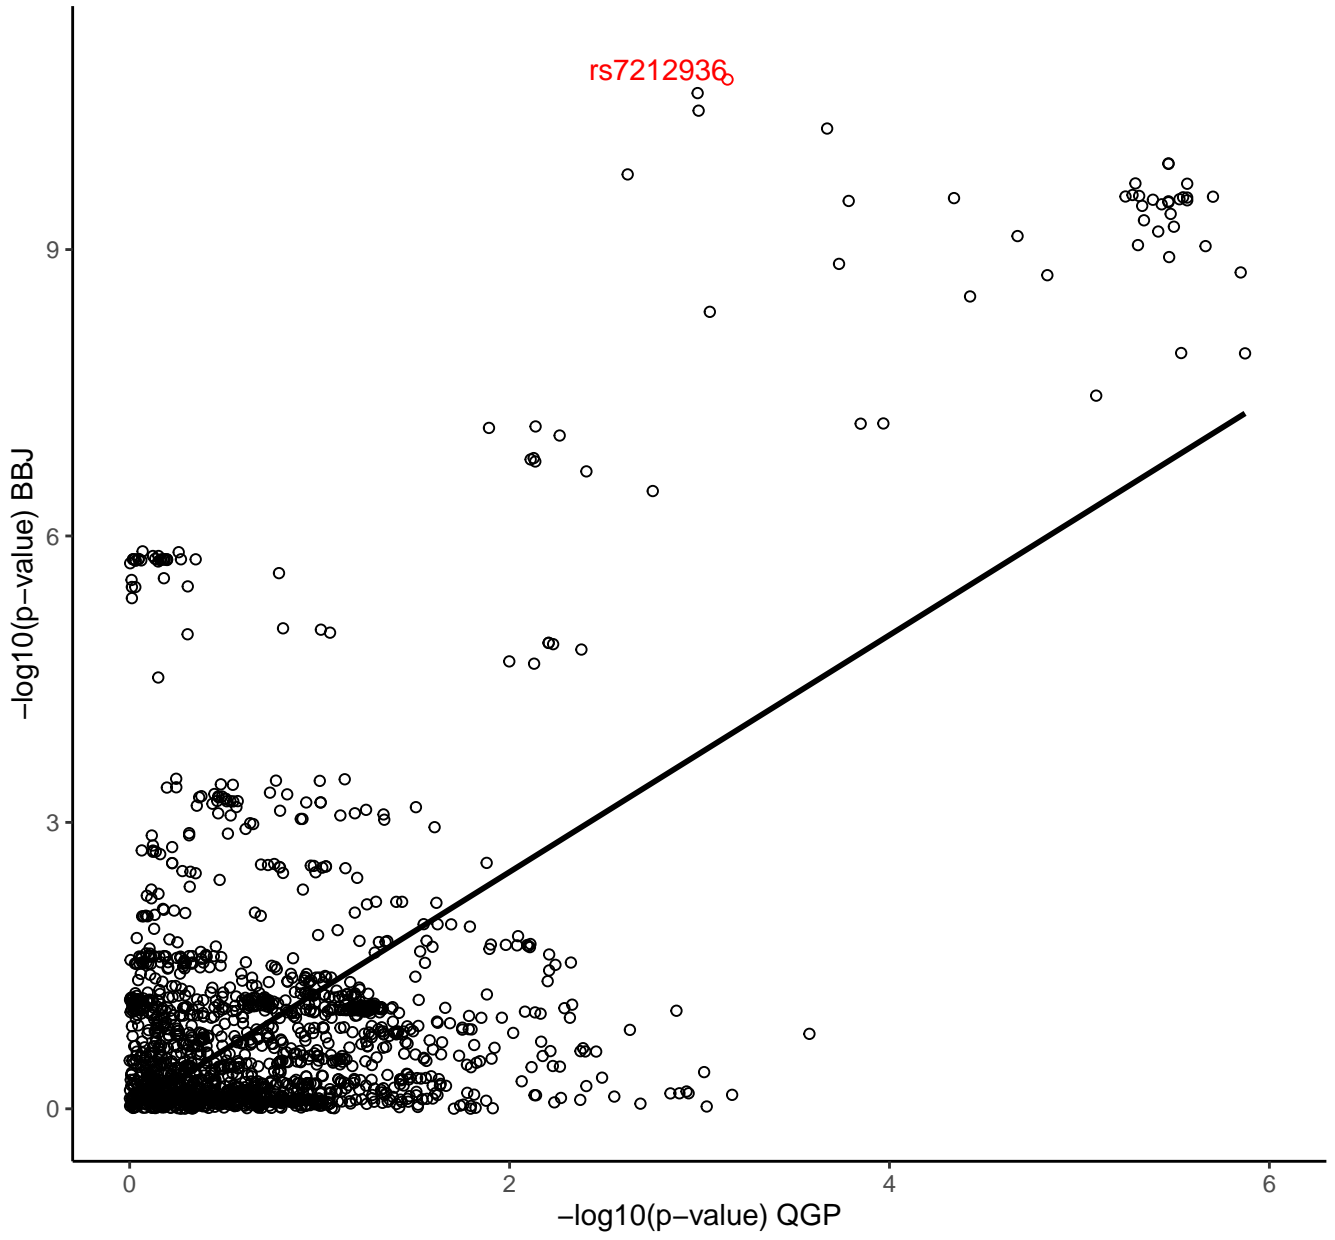

UA rs9895661

nSNPs = 1039; H2: 0.272; H3: 0.0152; H4: 0.713

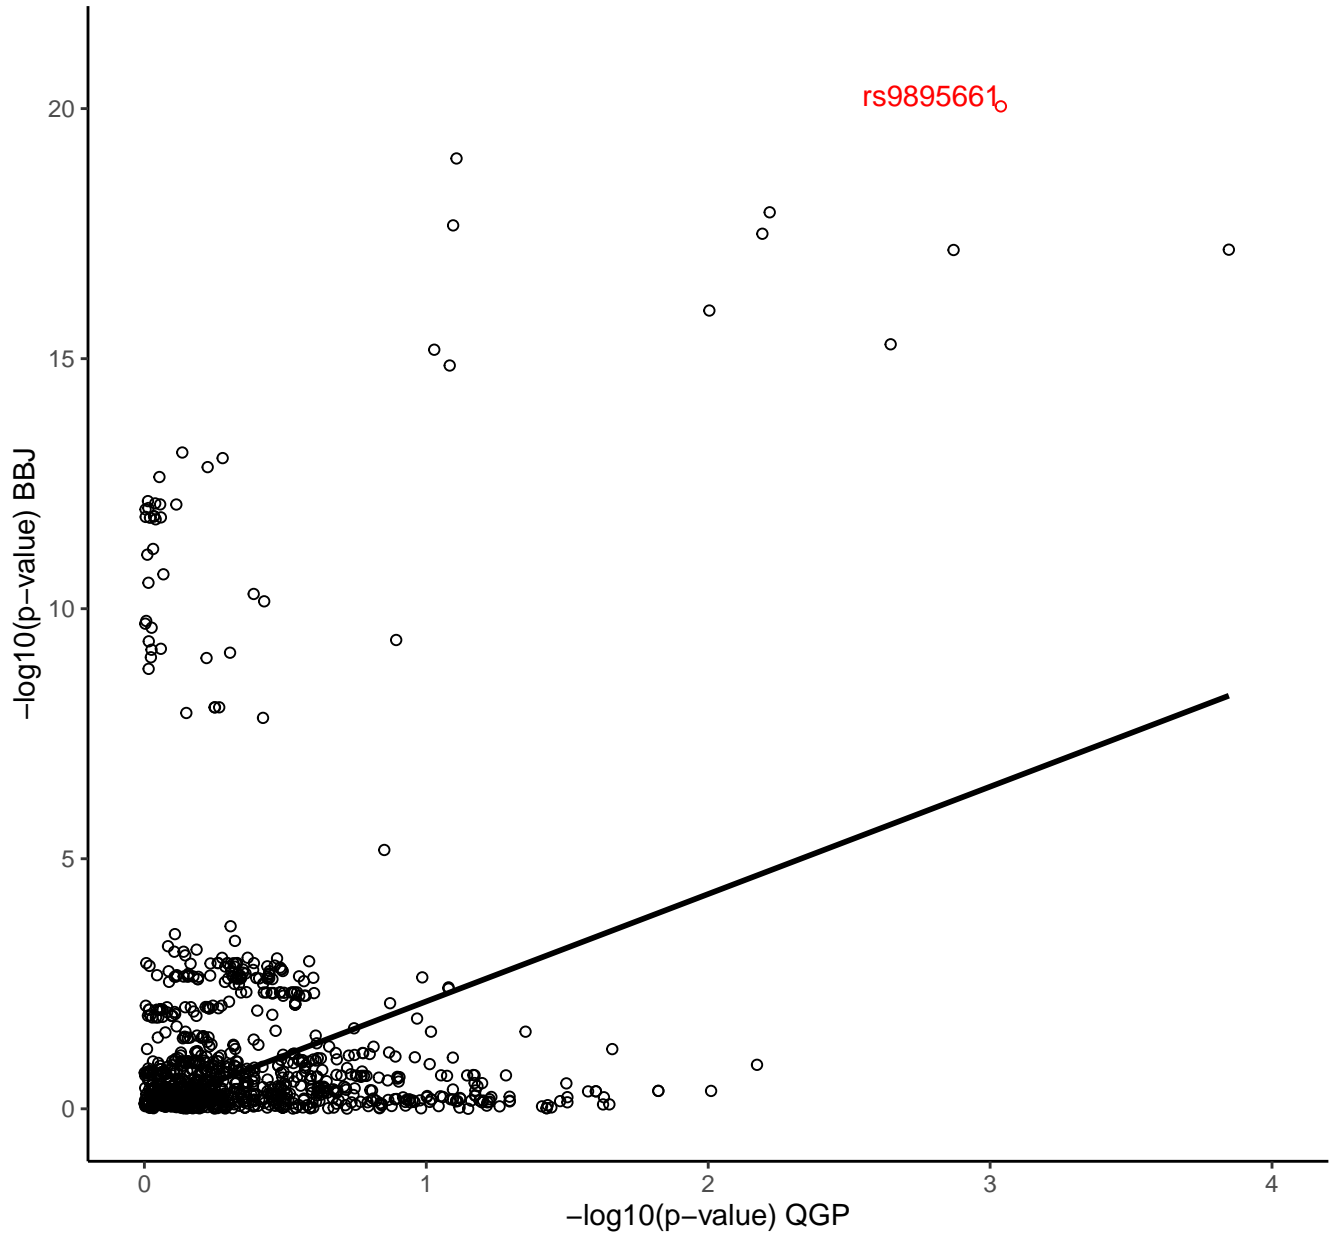

GGT rs36086195

nSNPs = 1092; H2: 0.258; H3: 0.0355; H4: 0.707

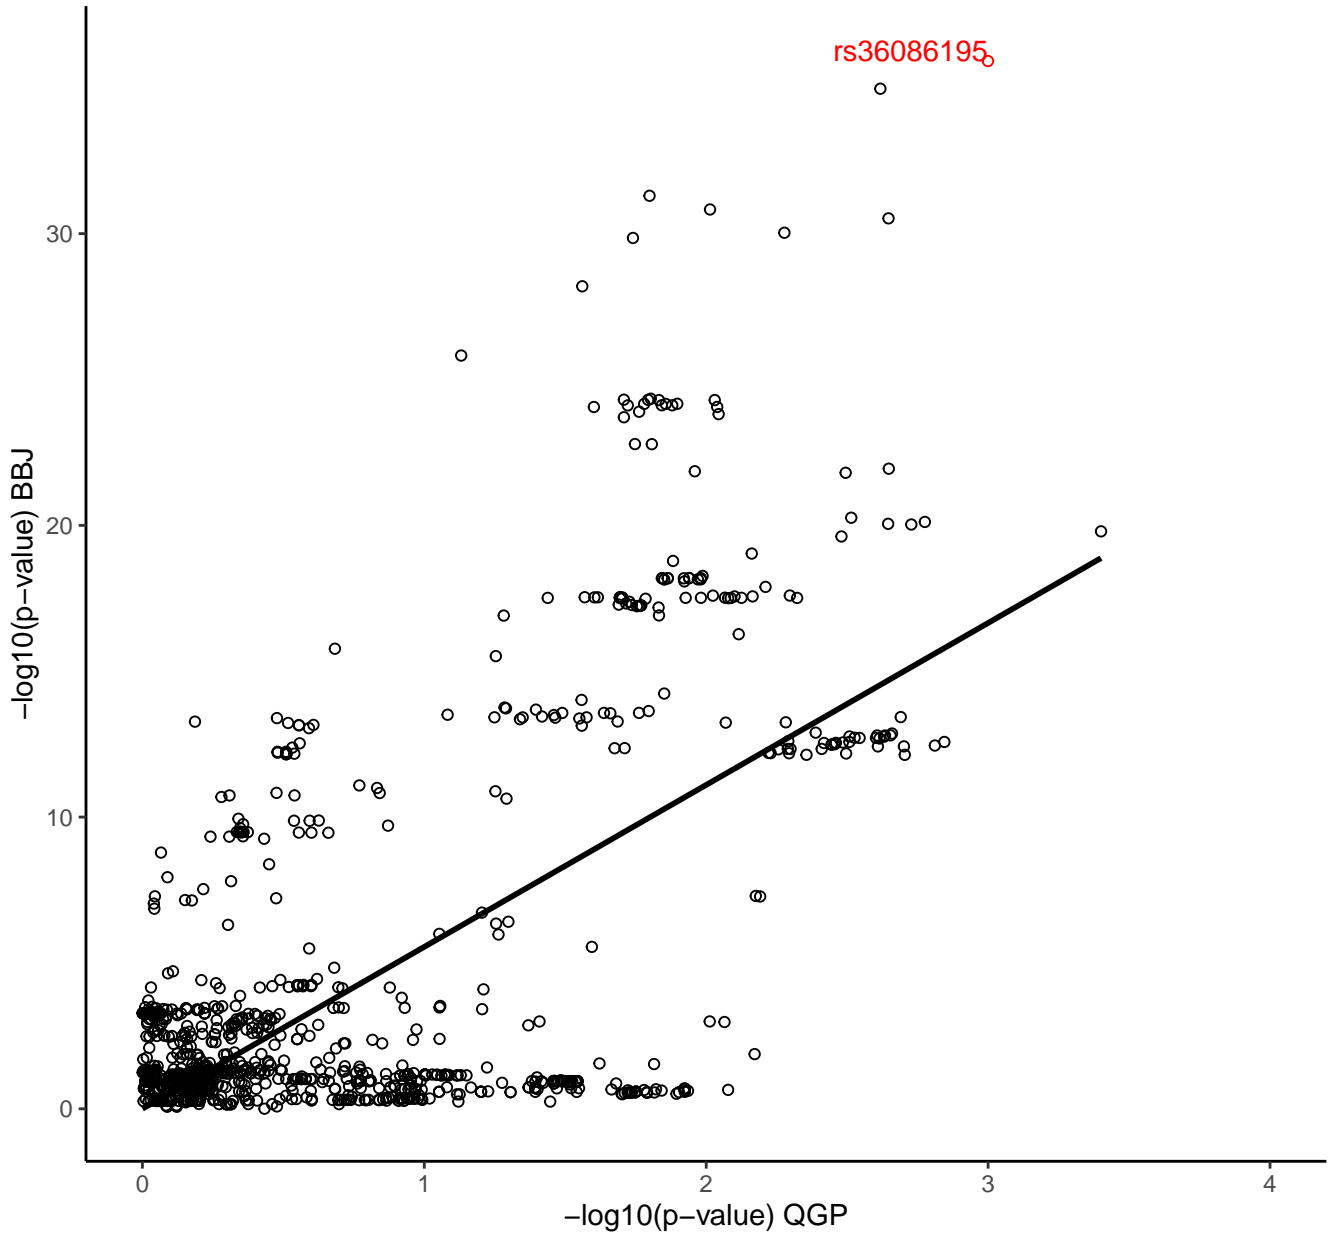

MCH rs6592965

nSNPs = 2070; H2: 0.281; H3: 0.0256; H4: 0.693

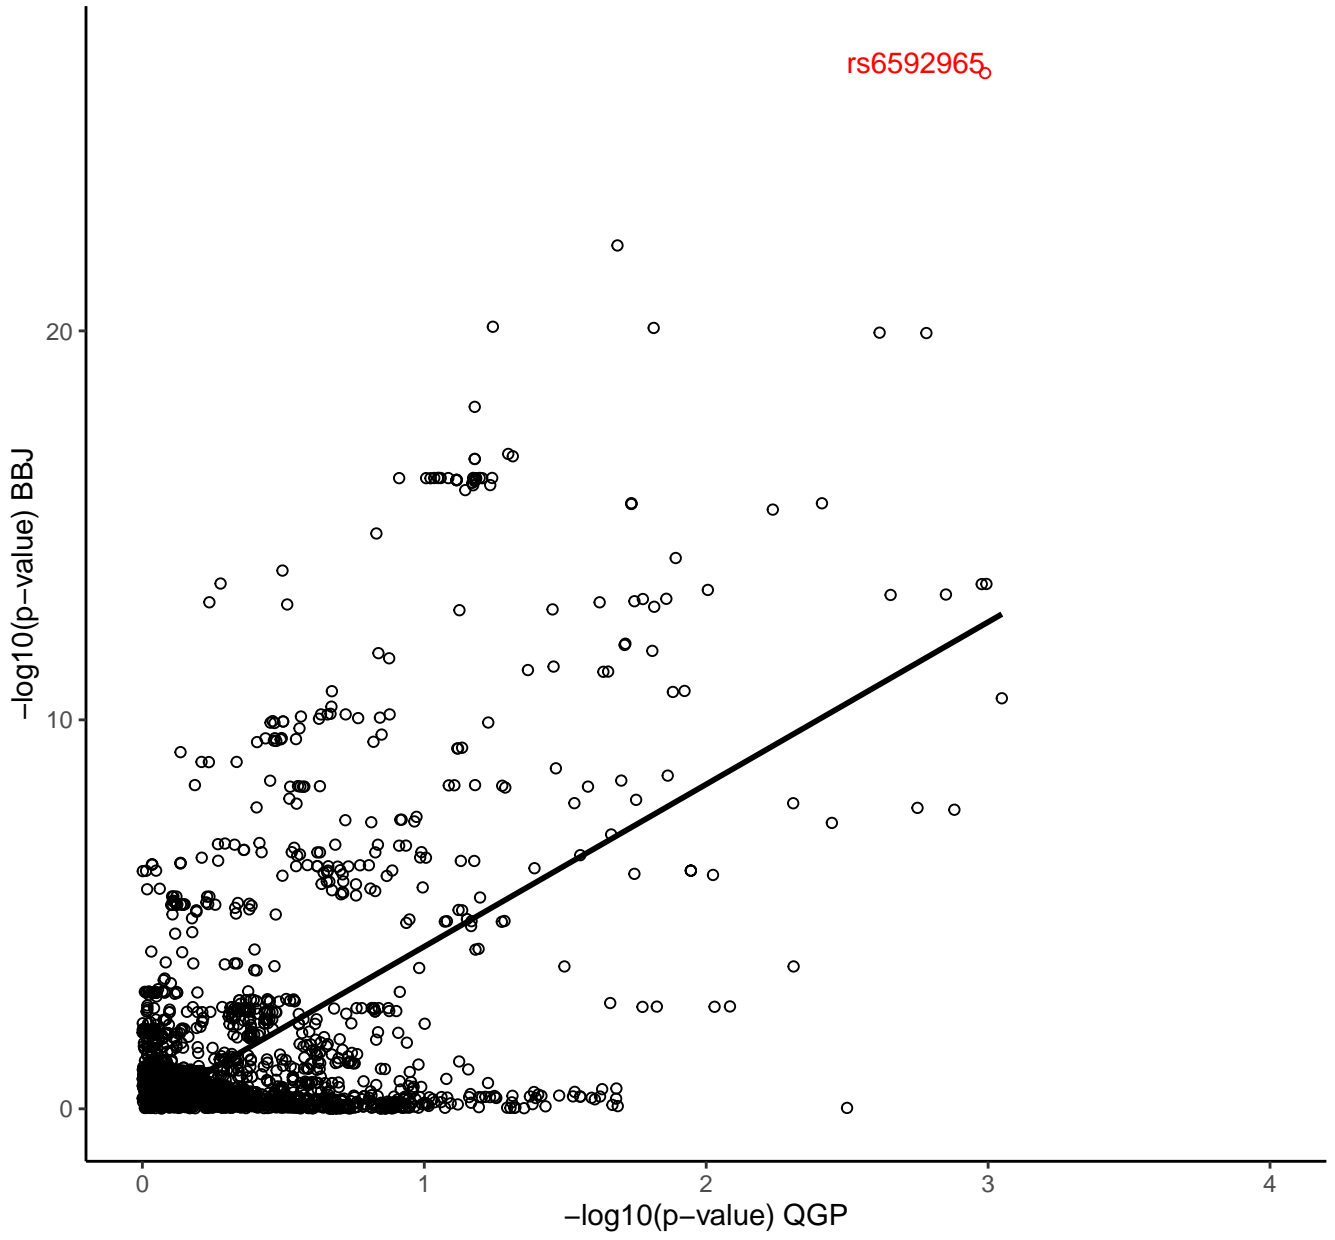

TC rs11745603

nSNPs = 1692; H2: 0.327; H3: 0.071; H4: 0.602

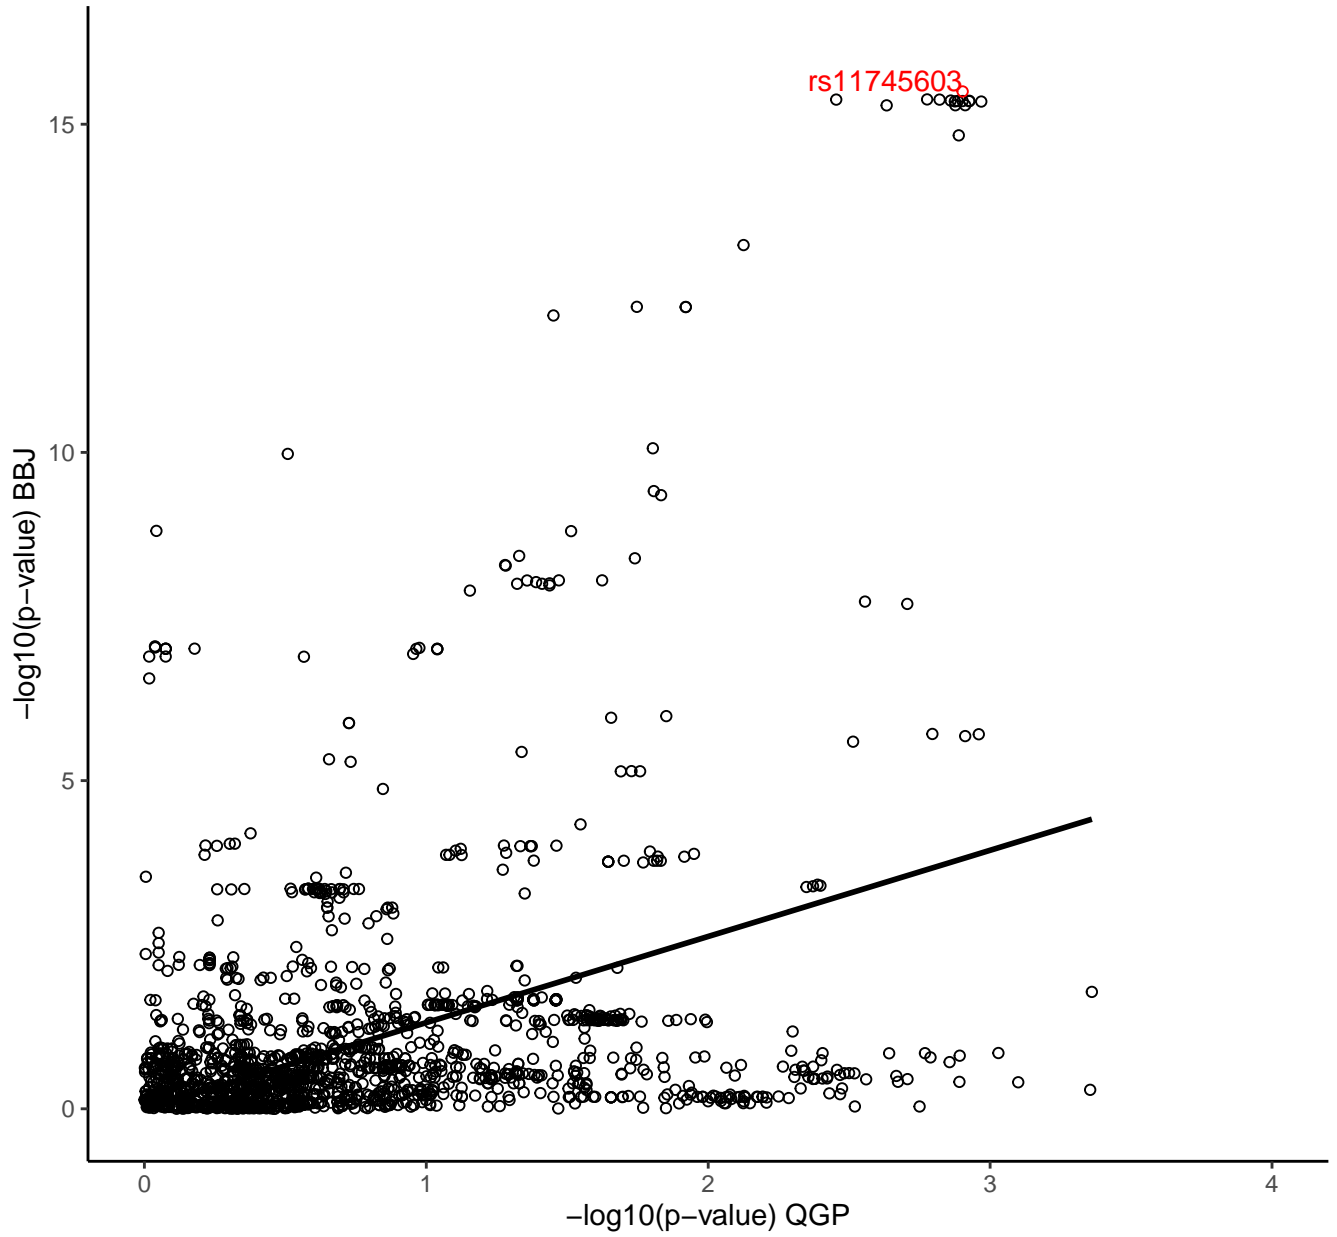

MCV rs9349205

nSNPs = 1349; H2: 0.267; H3: 0.032; H4: 0.701

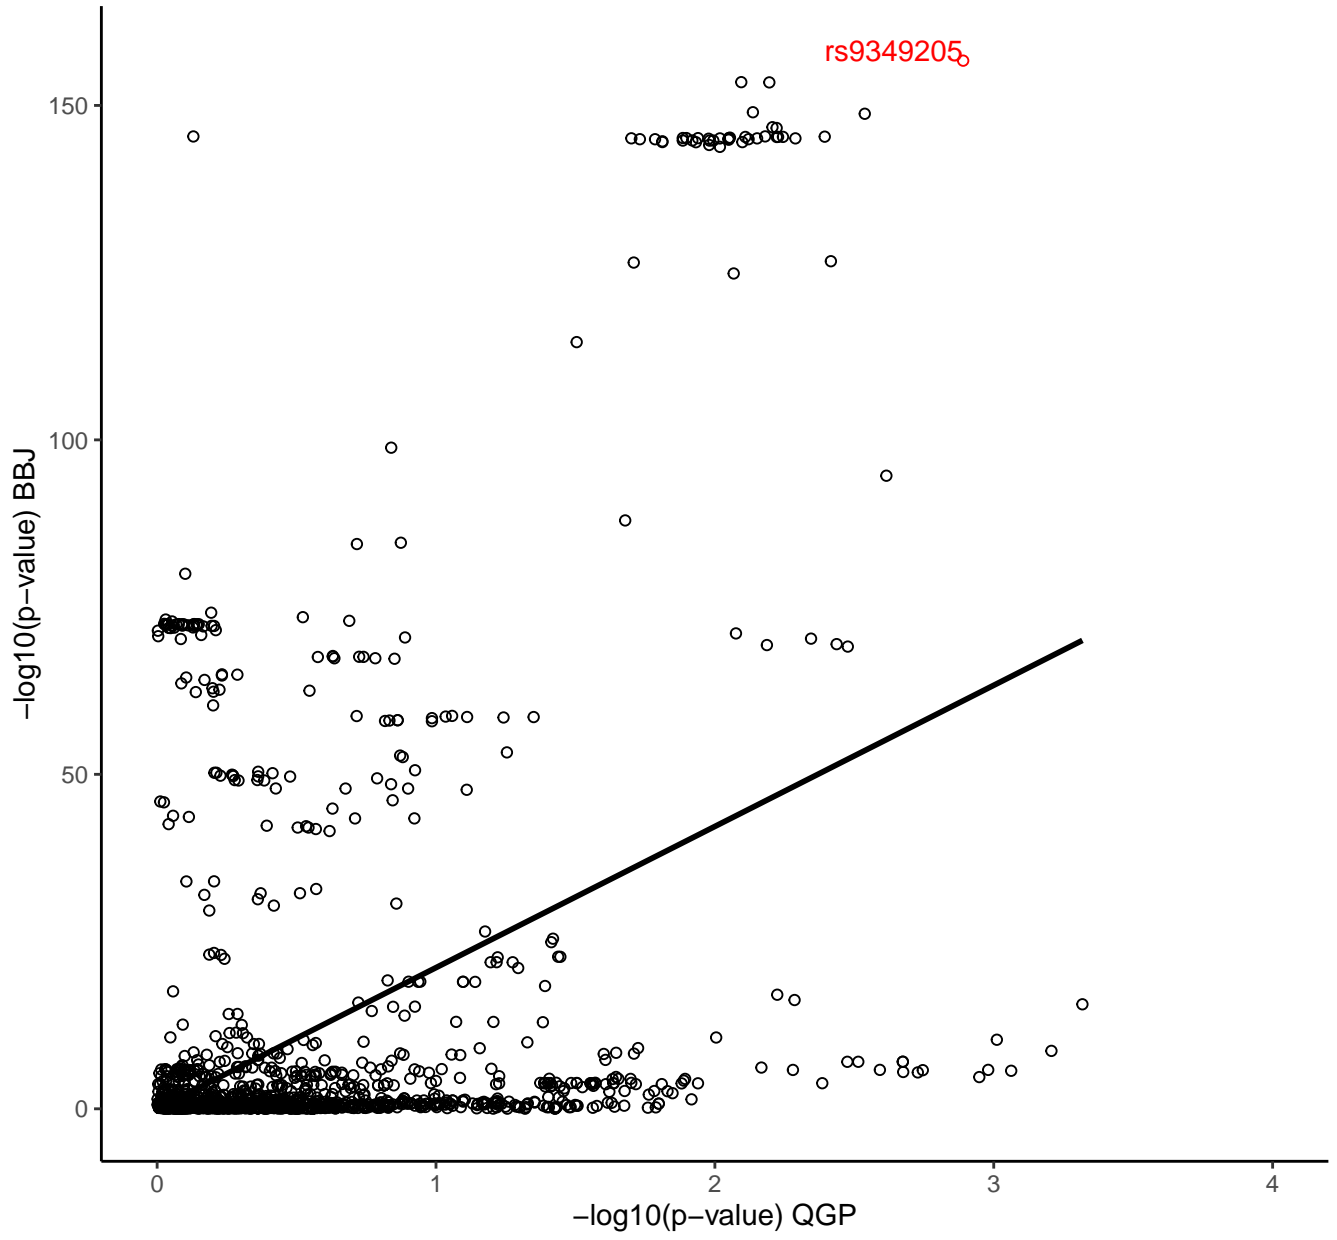



Plt rs9635298

nSNPs = 1565; H2: 0.371; H3: 0.0346; H4: 0.595

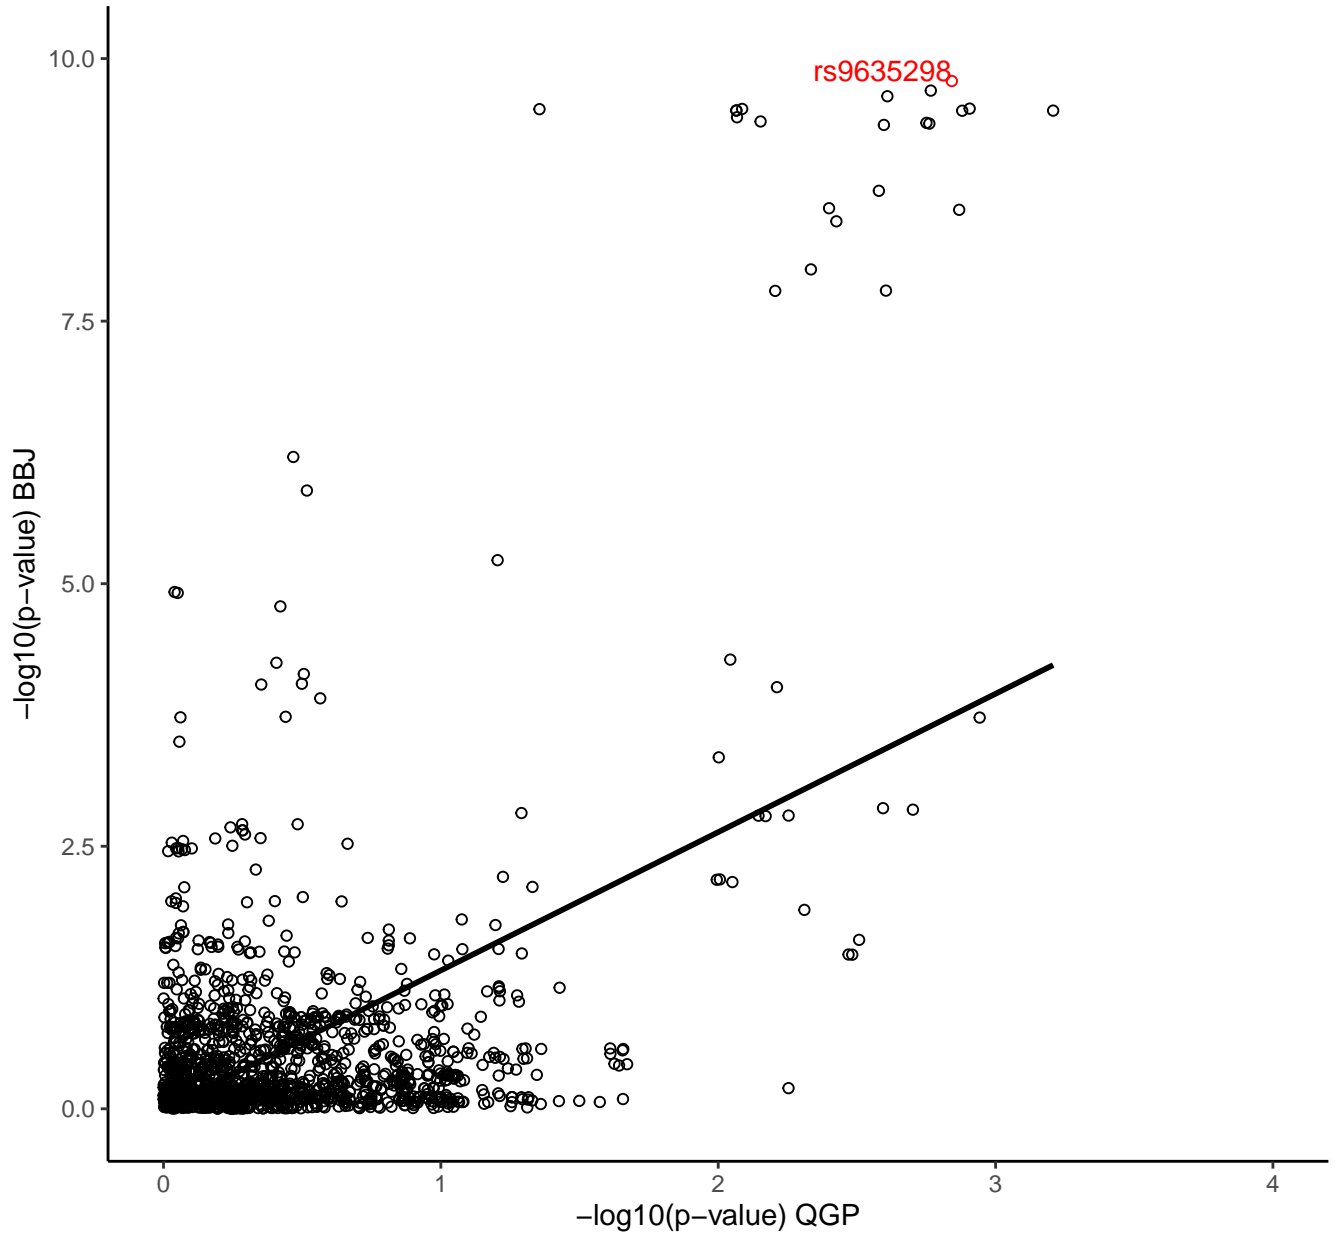

CK rs61751507

nSNPs = 1631; H2: 0.422; H3: 0.0715; H4: 0.506

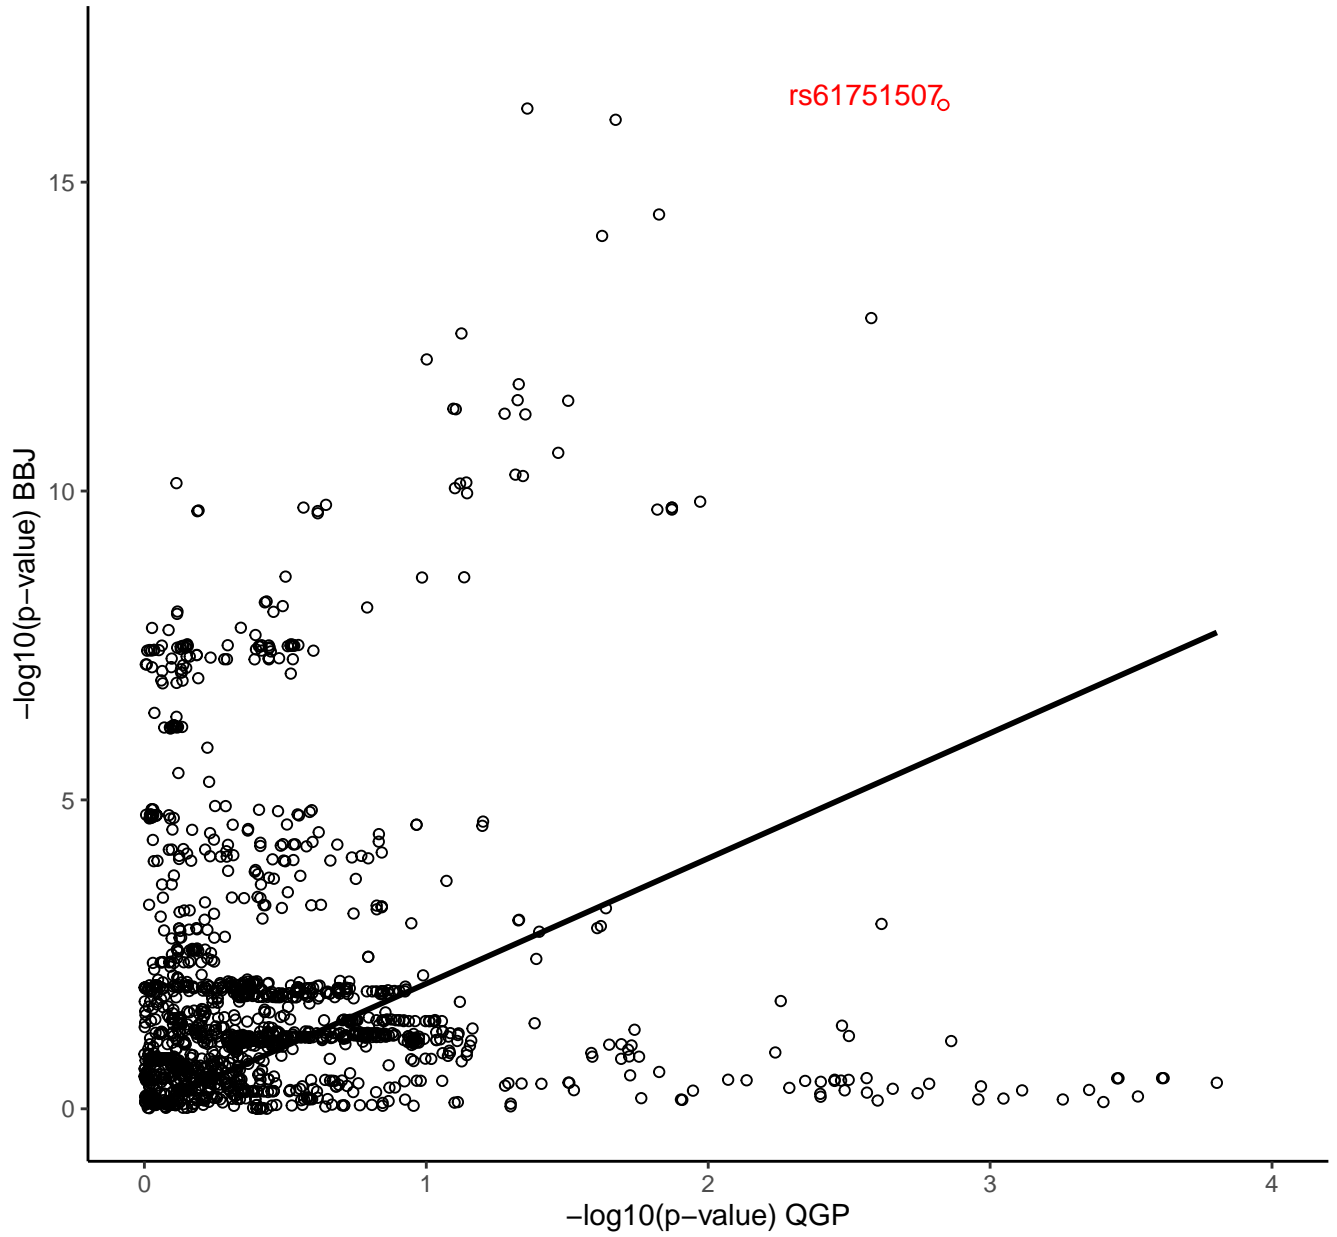

MCH rs62410539

nSNPs = 1247; H2: 0.445; H3: 0.0281; H4: 0.526

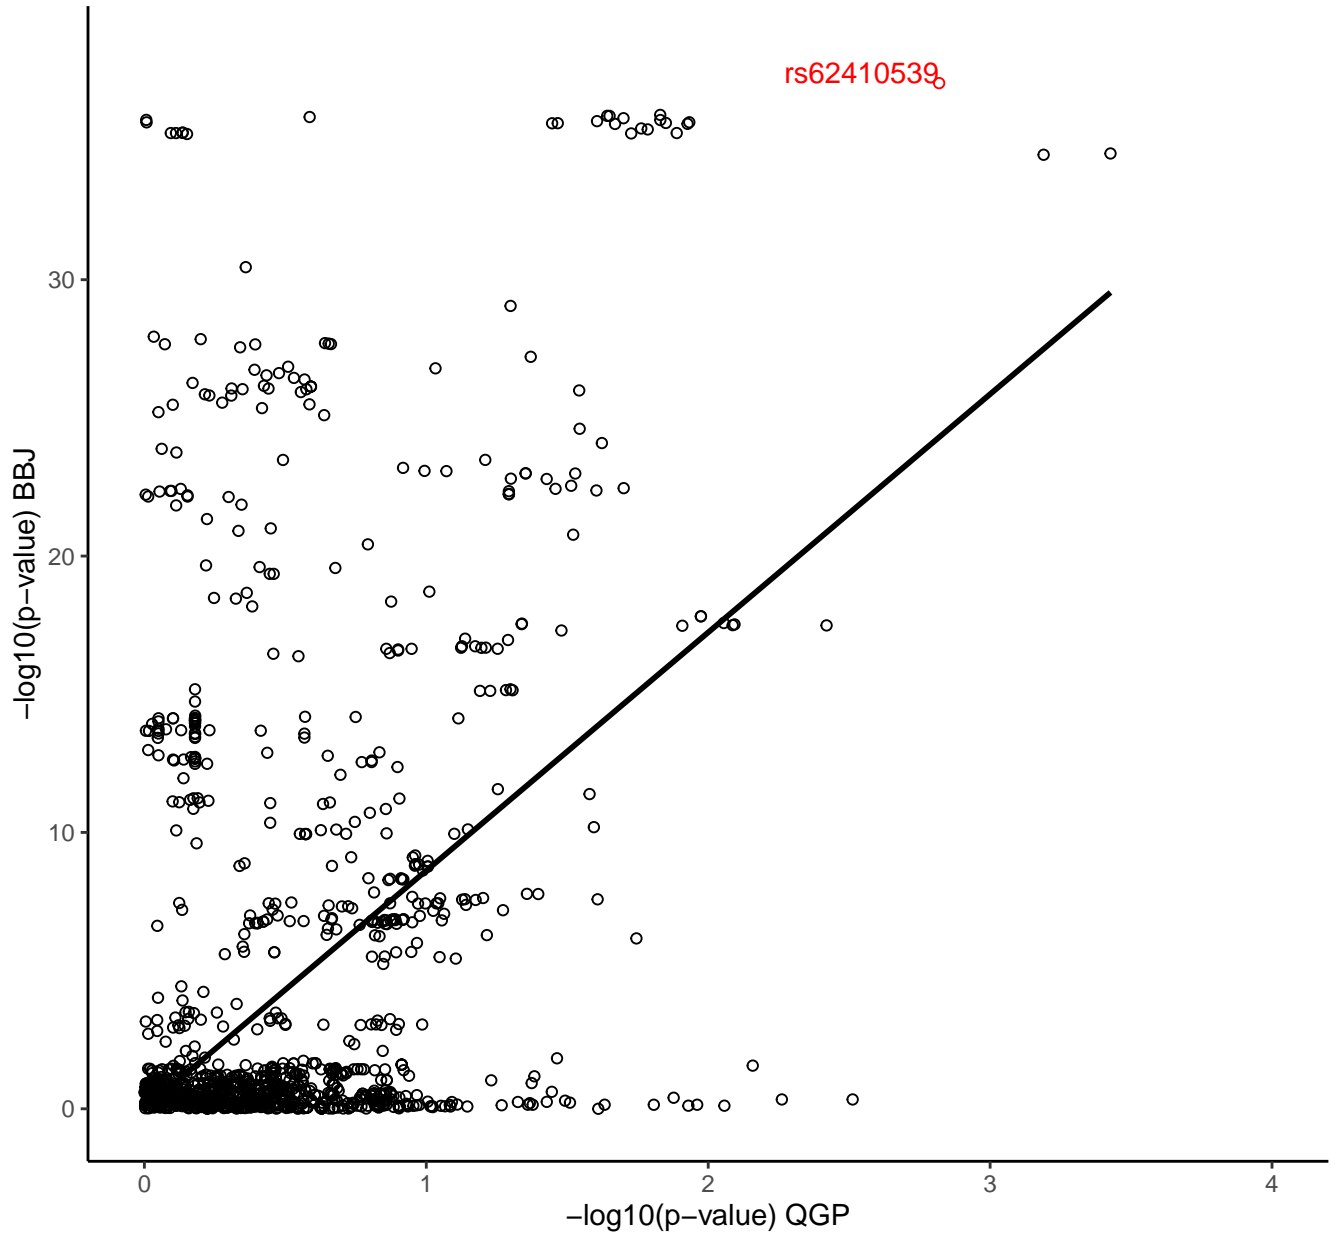

ALP rs2642438

nSNPs = 1768; H2: 0.00496; H3: 0.0107; H4: 0.984

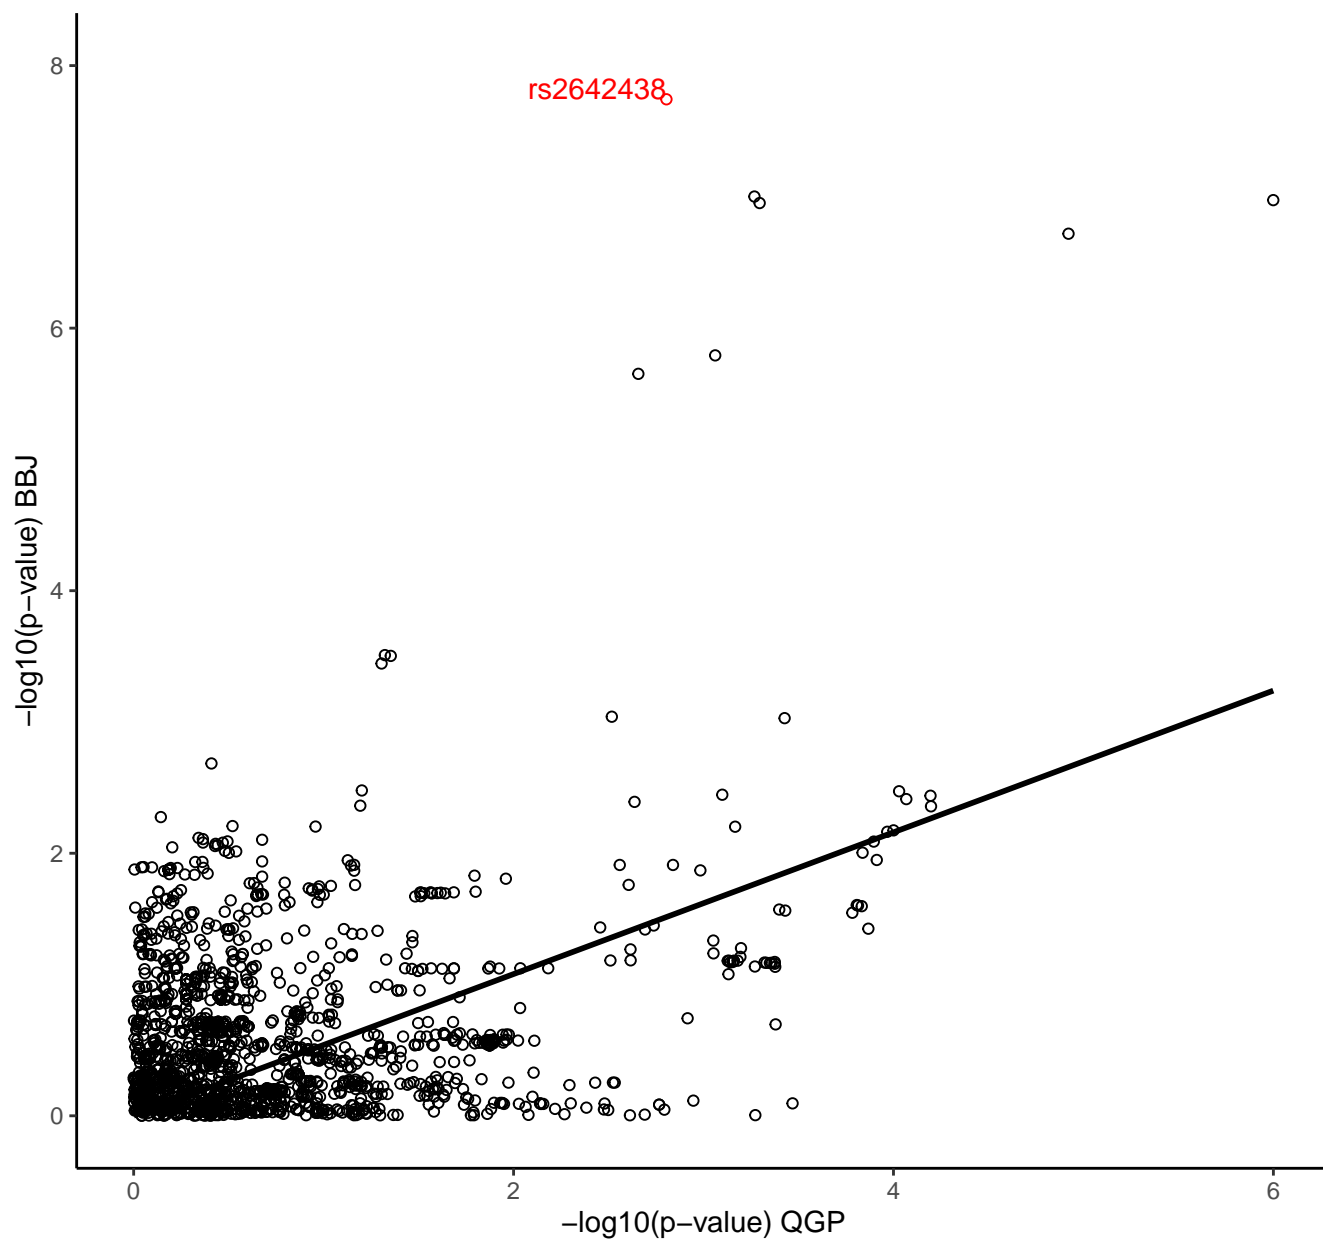

RBC rs4807205

nSNPs = 1466; H2: 0.162; H3: 0.0679; H4: 0.77

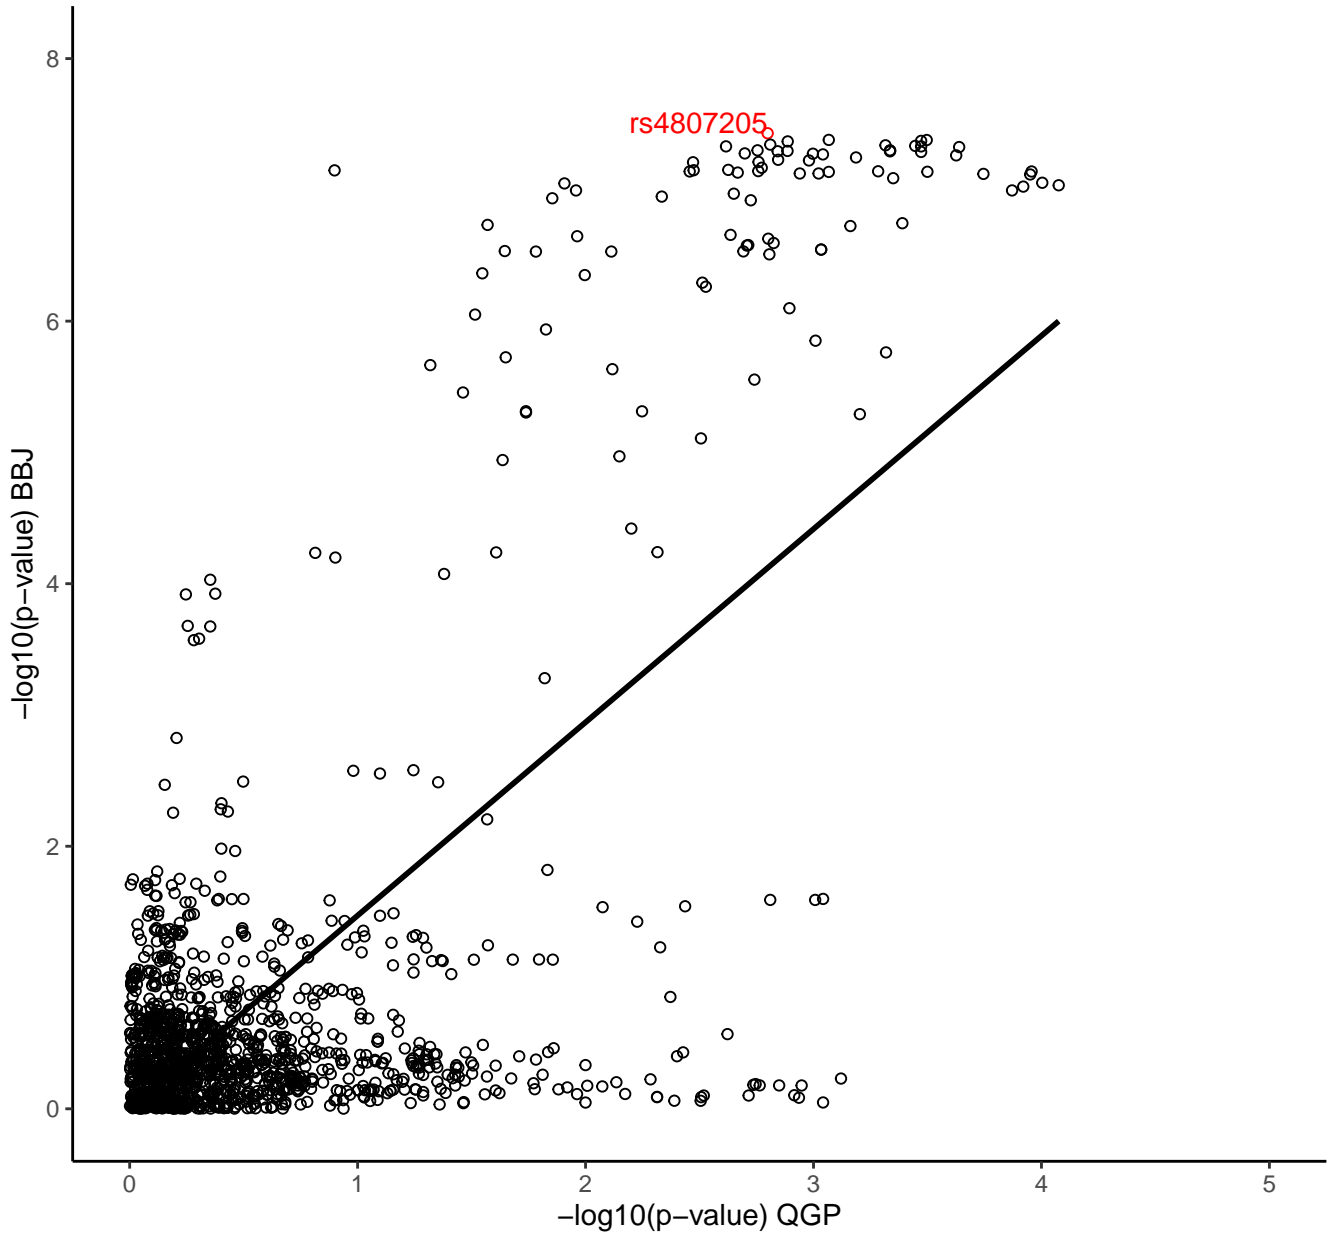

TP rs62282002

nSNPs = 1642; H2: 0.532; H3: 0.0357; H4: 0.431

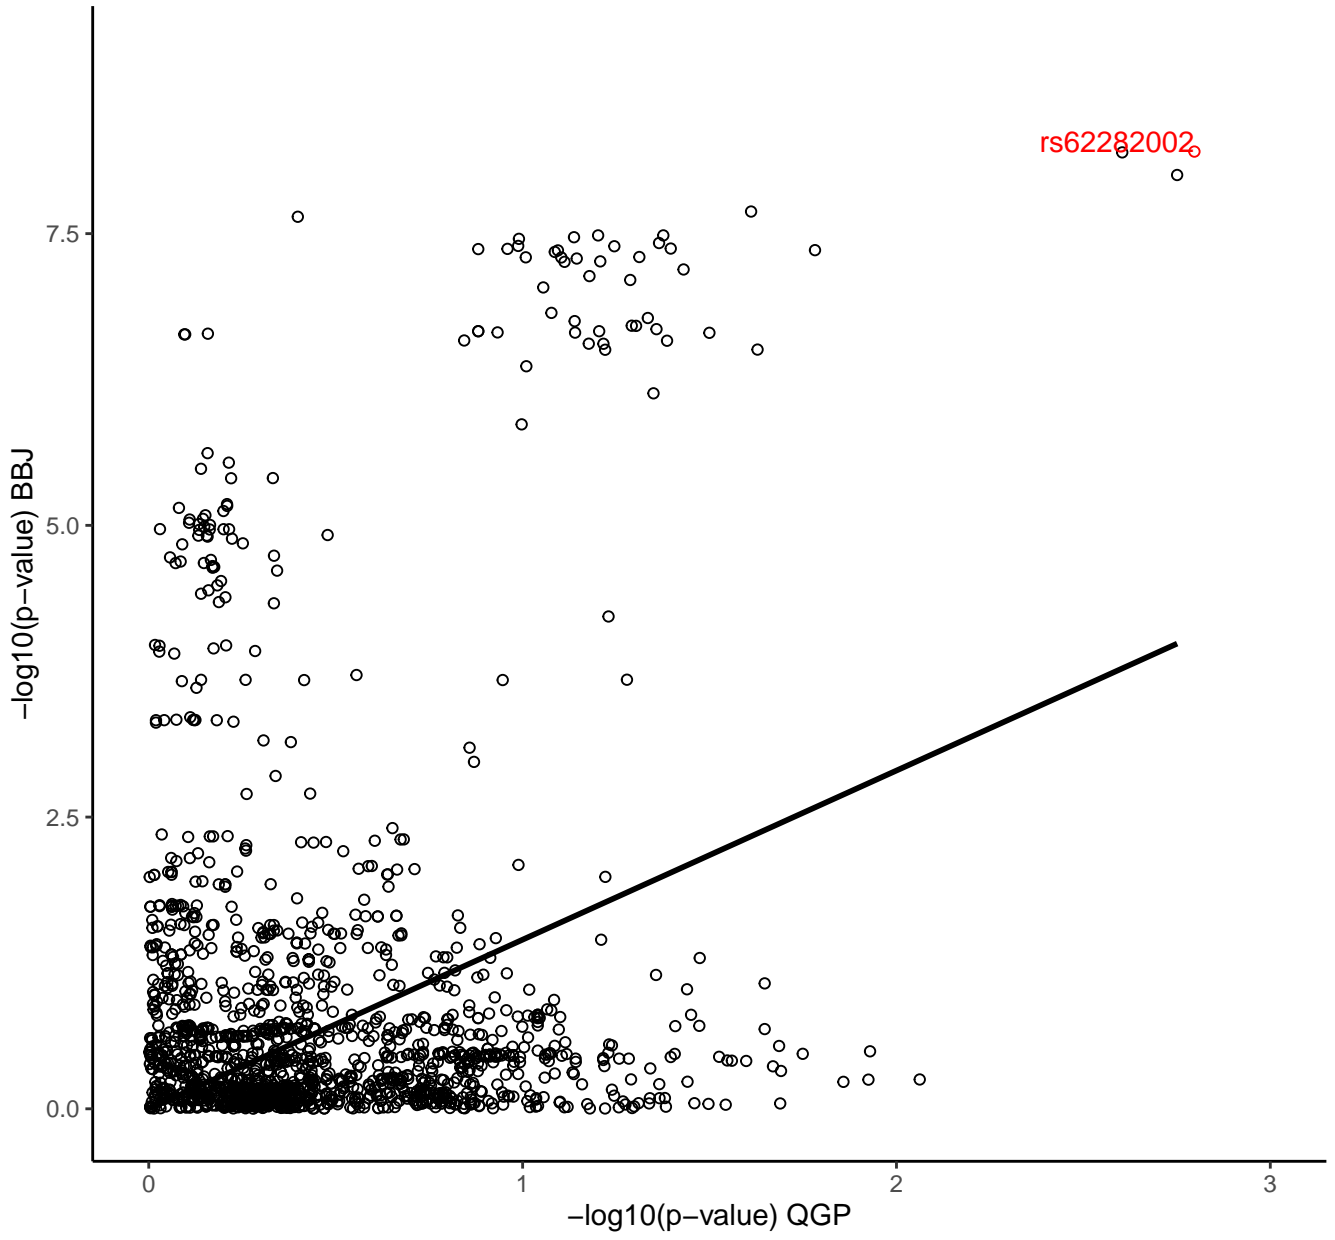

### TG rs2954021

nSNPs = 1596; H2: 0.126; H3: 0.691; H4: 0.183

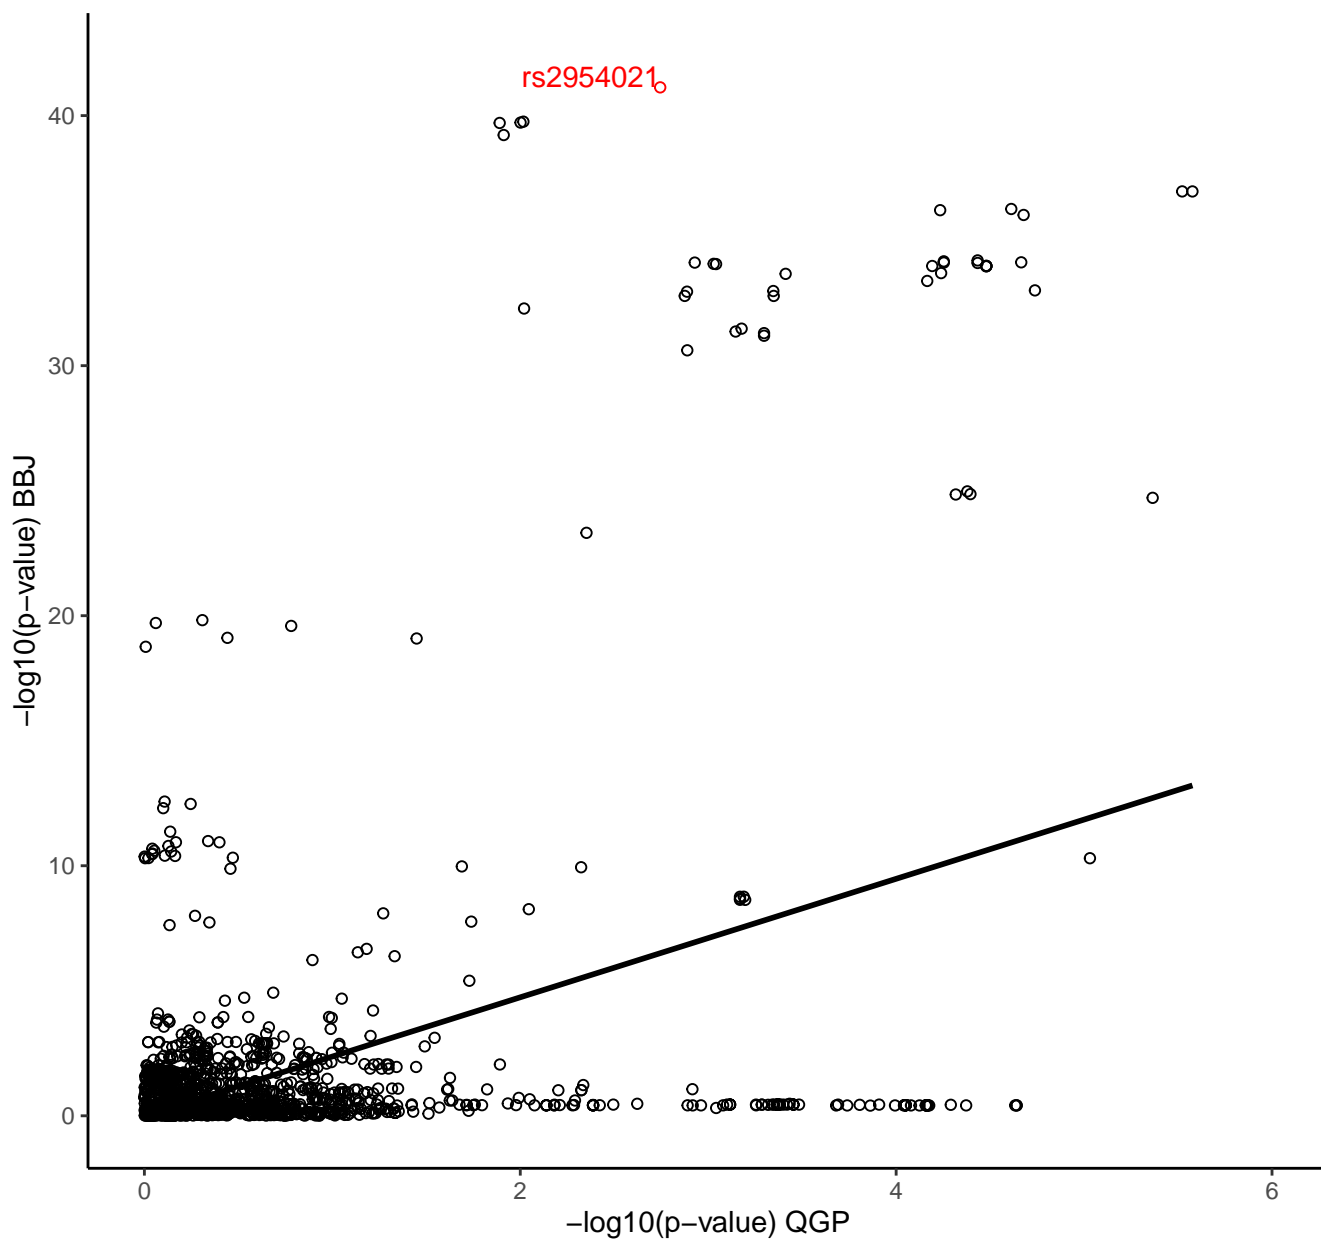

sCr rs7475348

nSNPs = 1642; H2: 0.319; H3: 0.0763; H4: 0.604

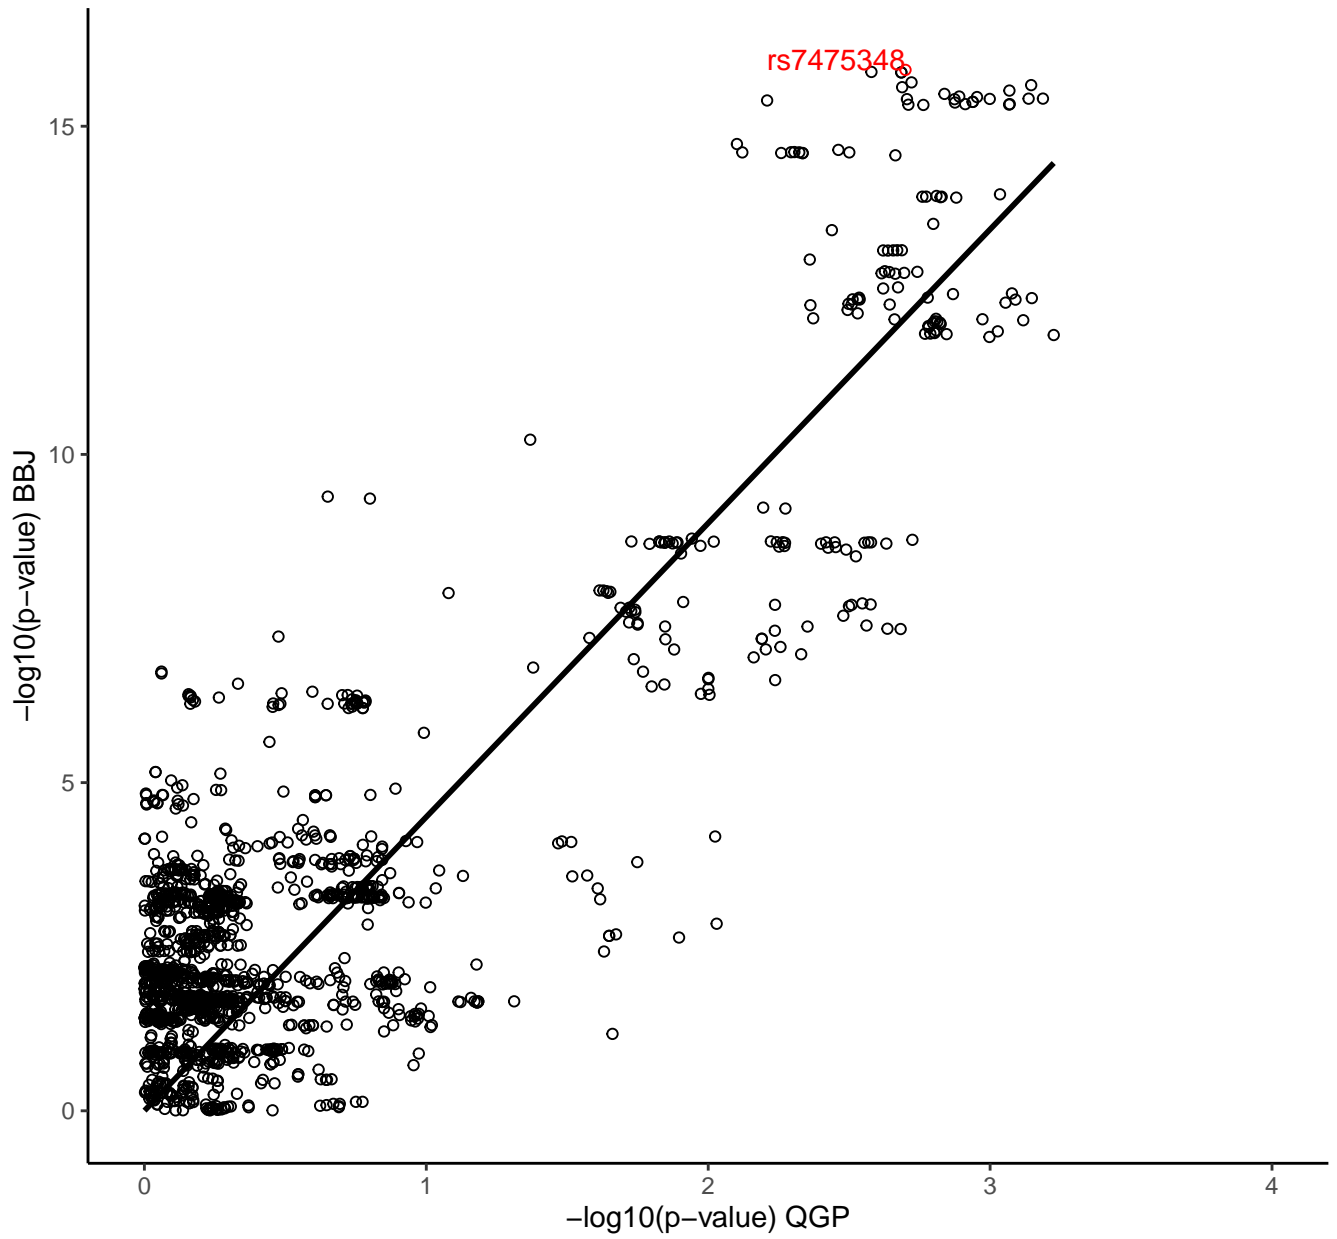



Plt rs67036916

nSNPs = 1551; H2: 0.272; H3: 0.0498; H4: 0.678

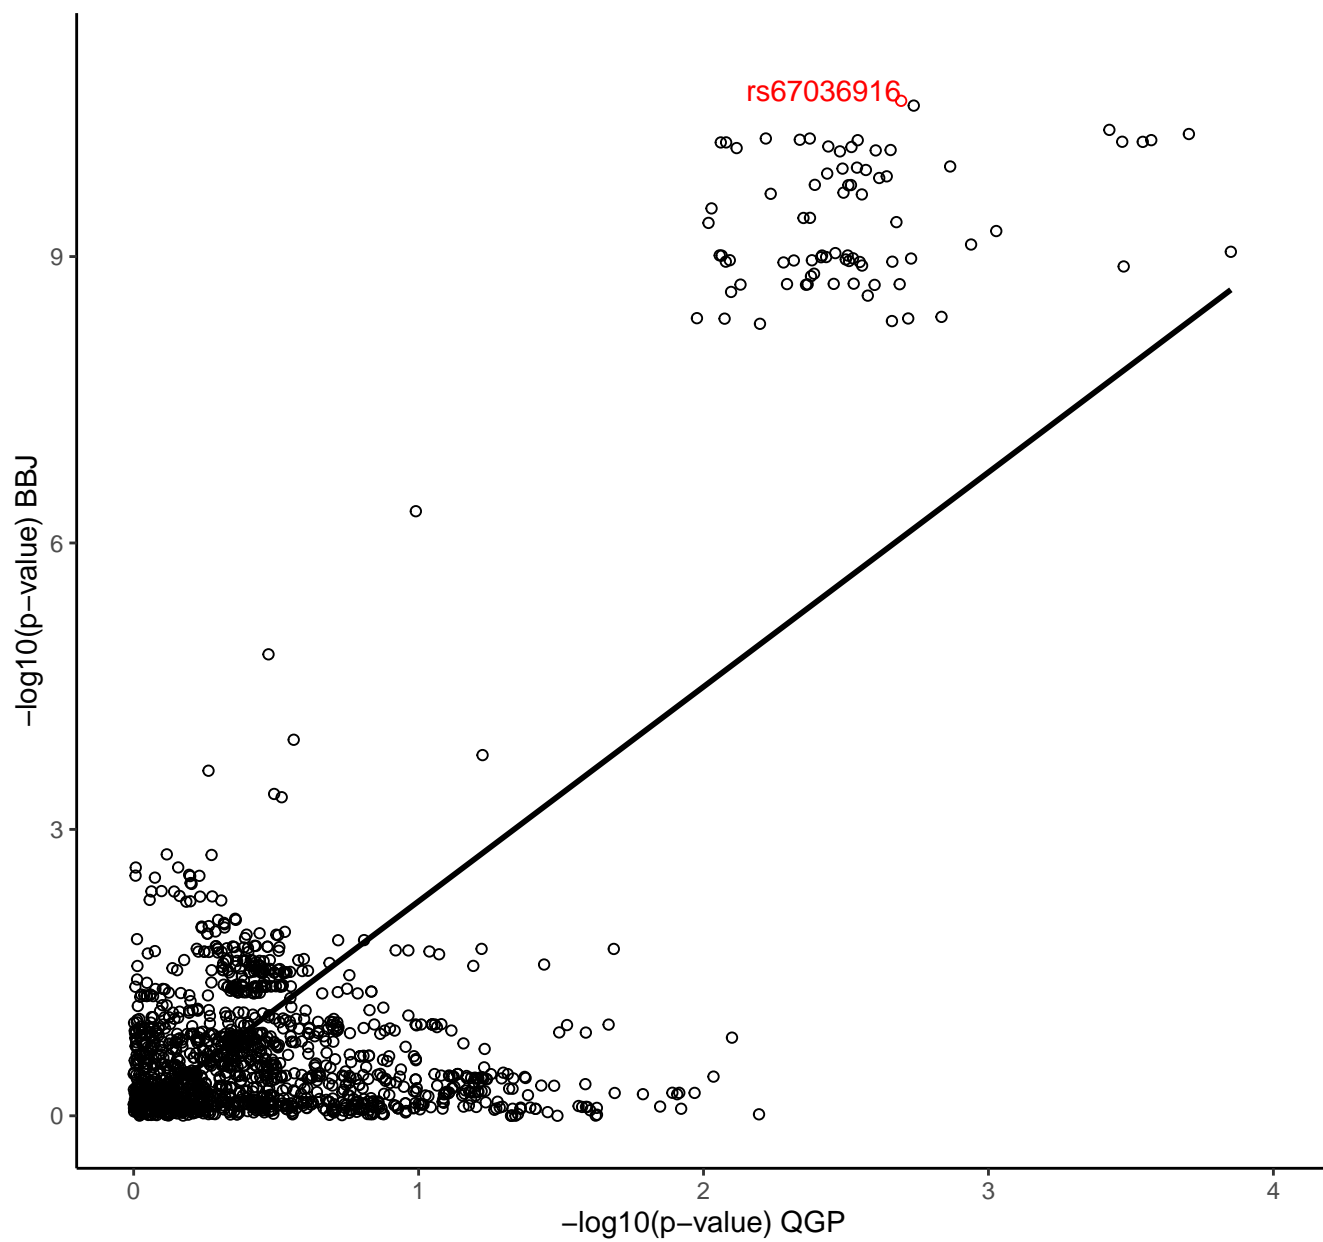

MCV rs855791

nSNPs = 1770; H2: 0.407; H3: 0.0391; H4: 0.554

rs855791

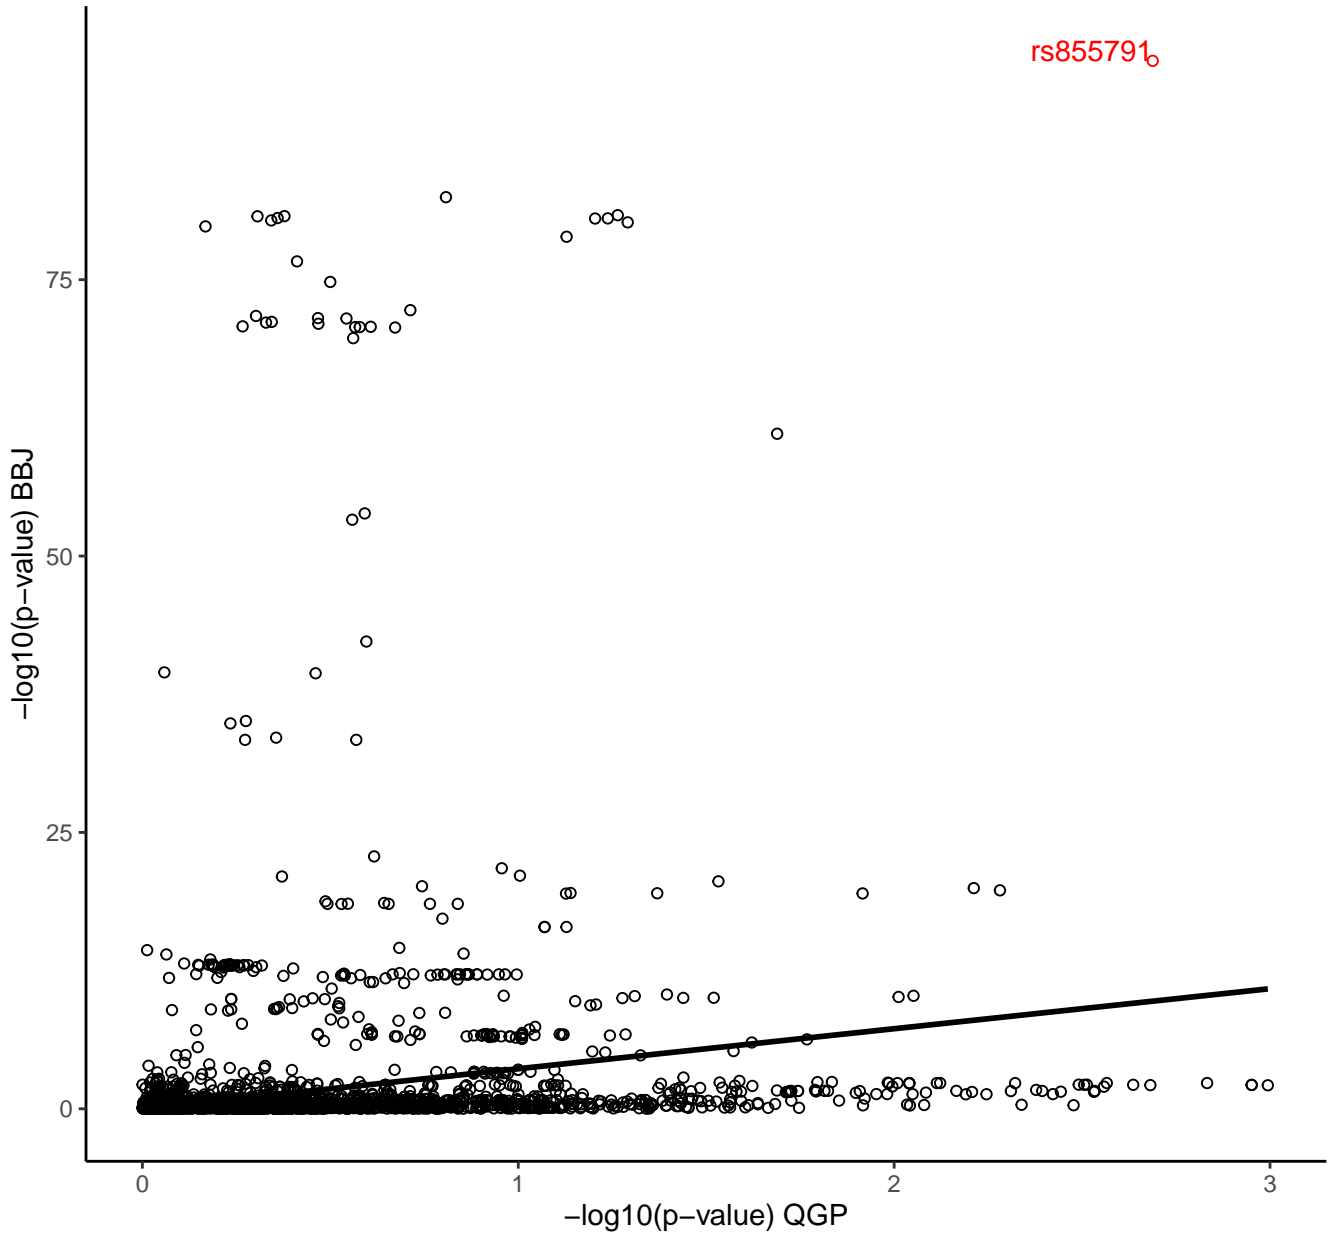

TC rs6982502

nSNPs = 1594; H2: 0.456; H3: 0.124; H4: 0.42

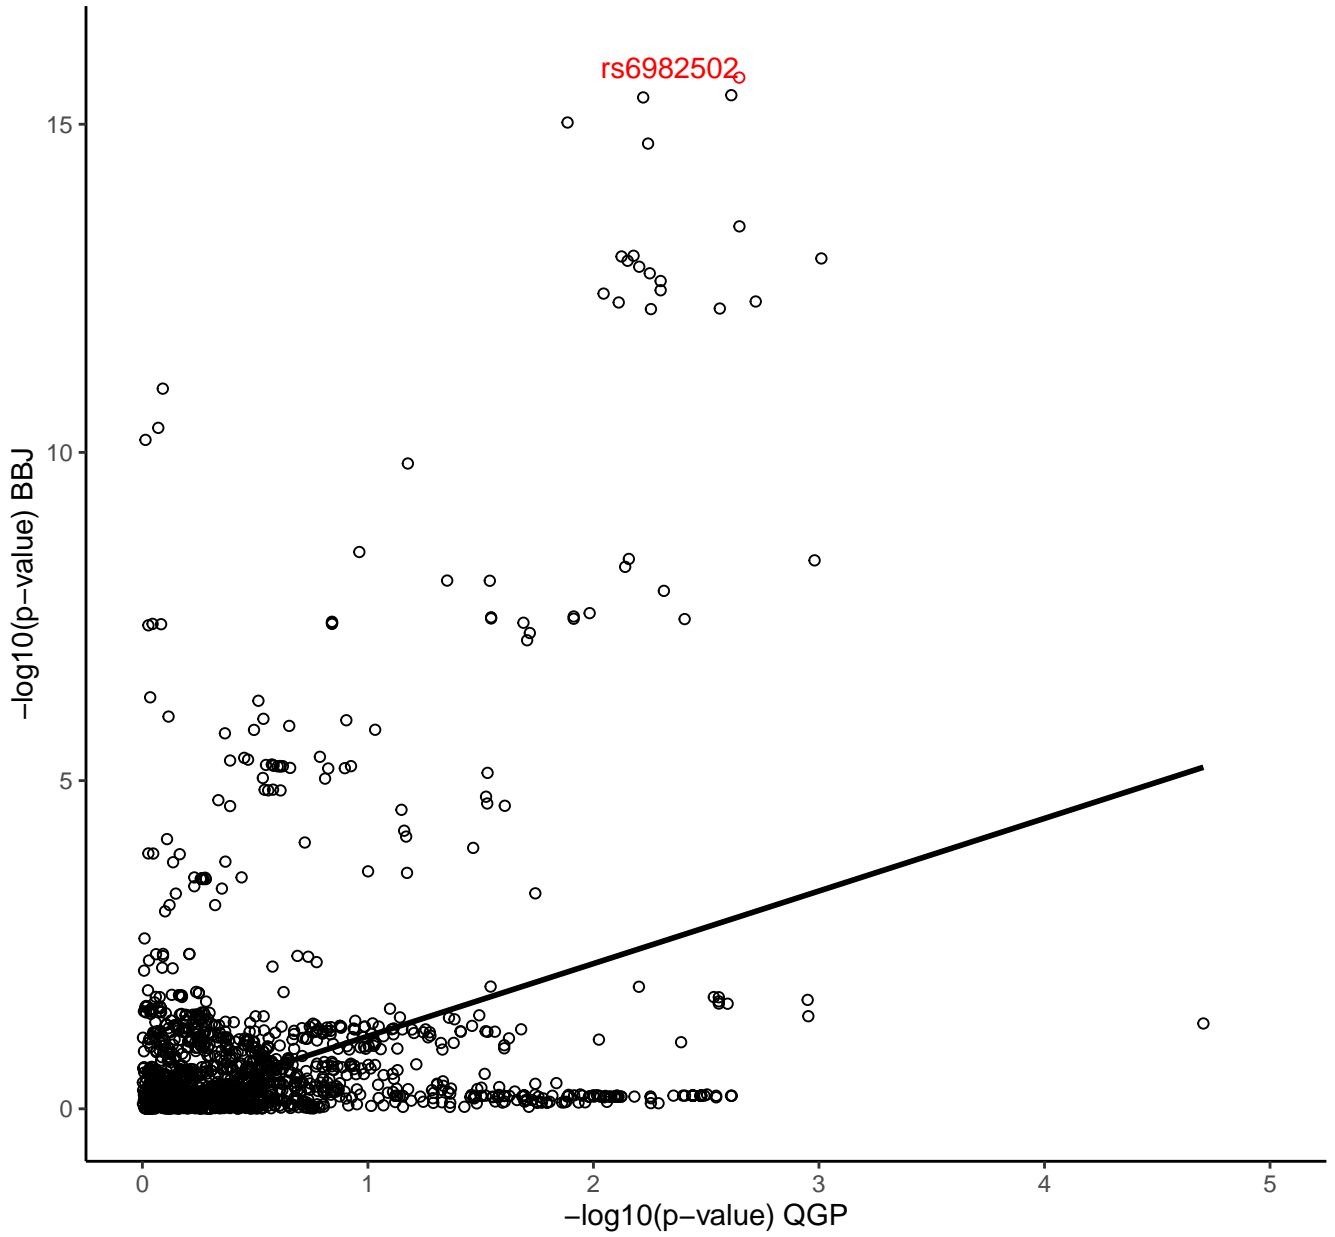

Plt rs2068888

nSNPs = 1818; H2: 0.482; H3: 0.0487; H4: 0.469

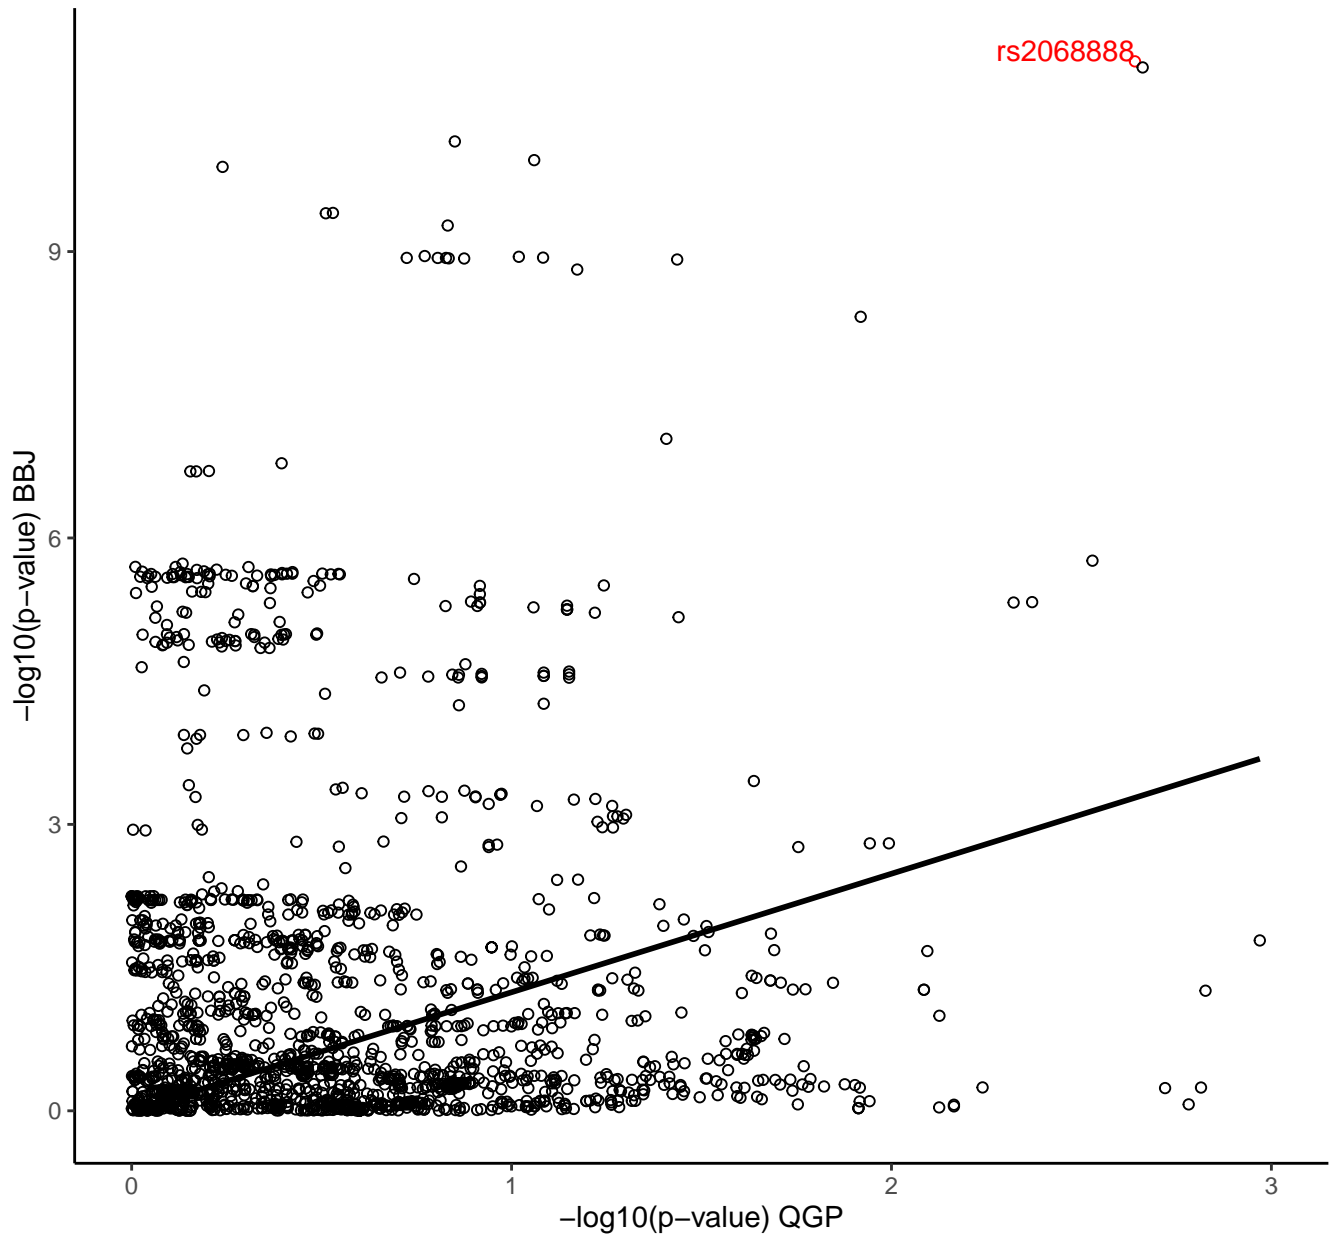

Ca rs9895661

nSNPs = 1039; H2: 0.576; H3: 0.0476; H4: 0.376

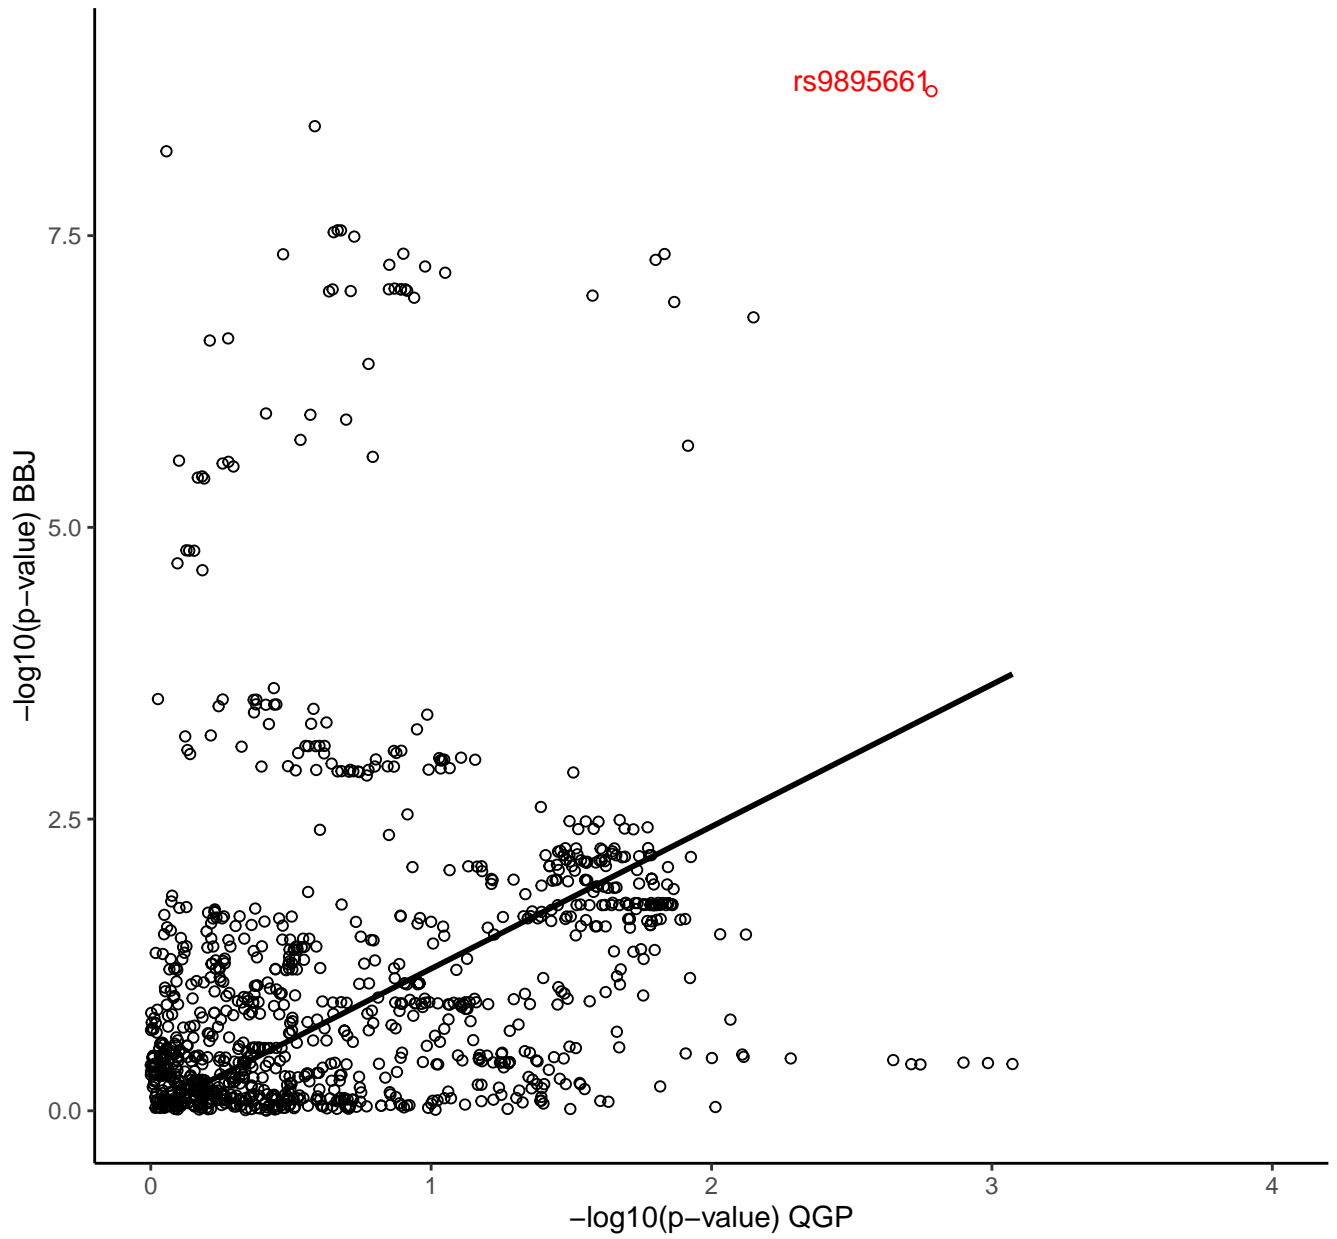

UA rs6460047

nSNPs = 604; H2: 0.391; H3: 0.0771; H4: 0.531

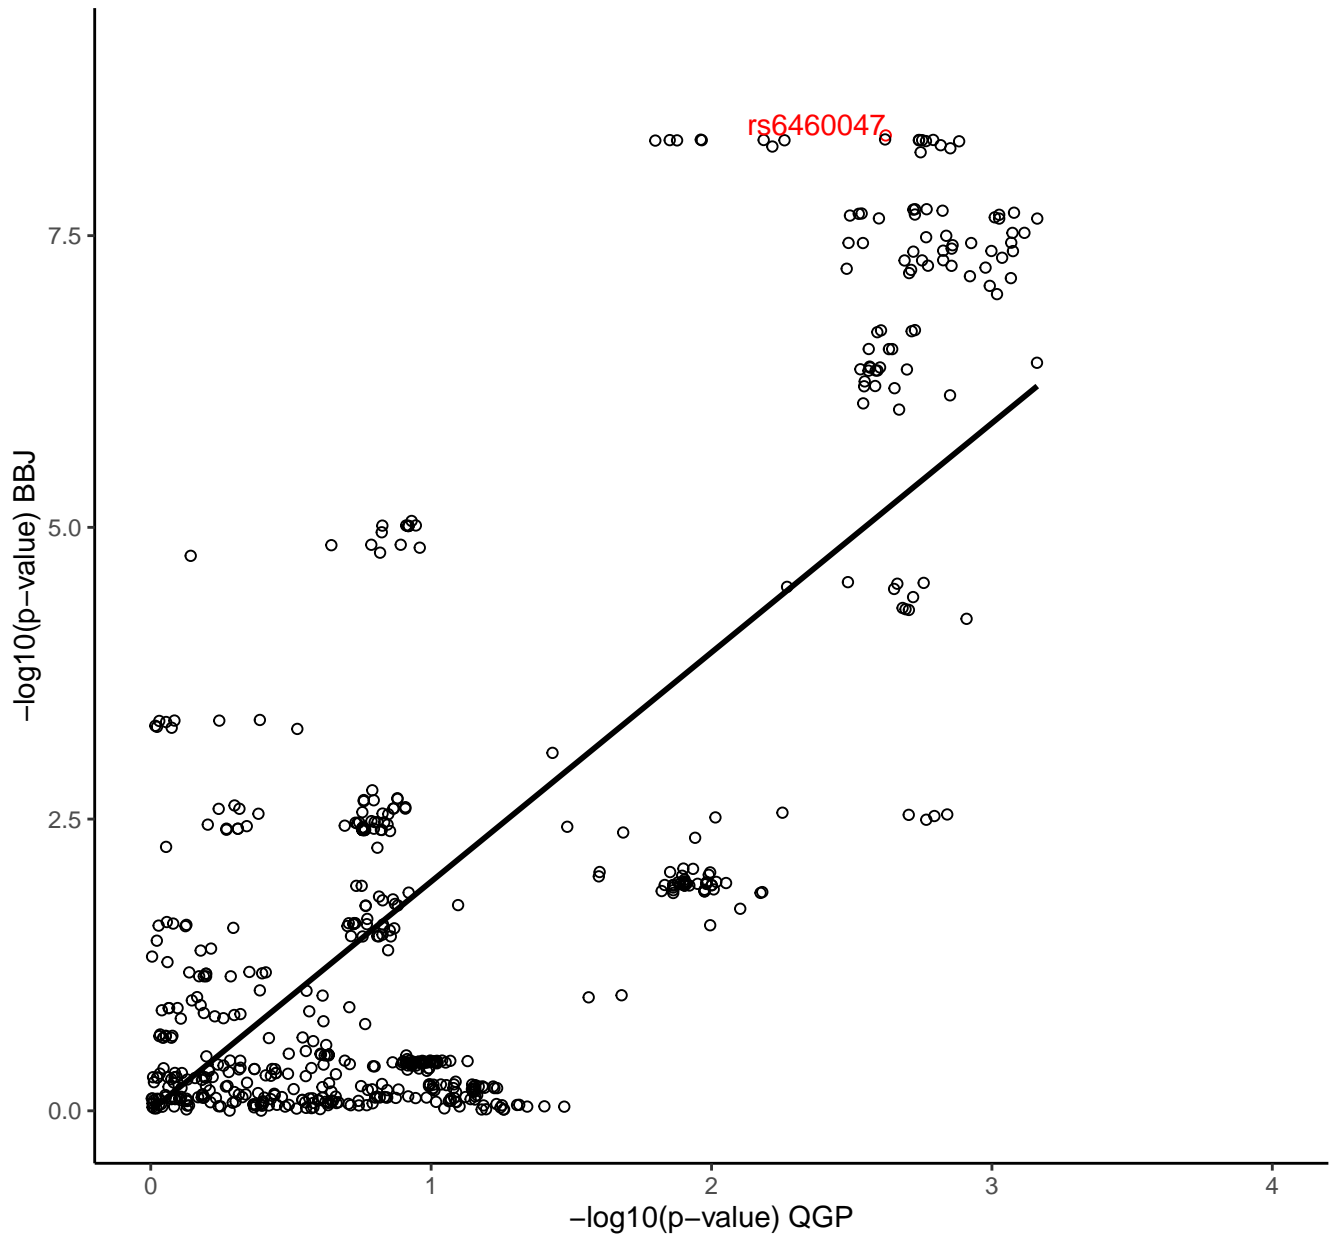

### WBC rs445

nSNPs = 924; H2: 0.414; H3: 0.0159; H4: 0.57

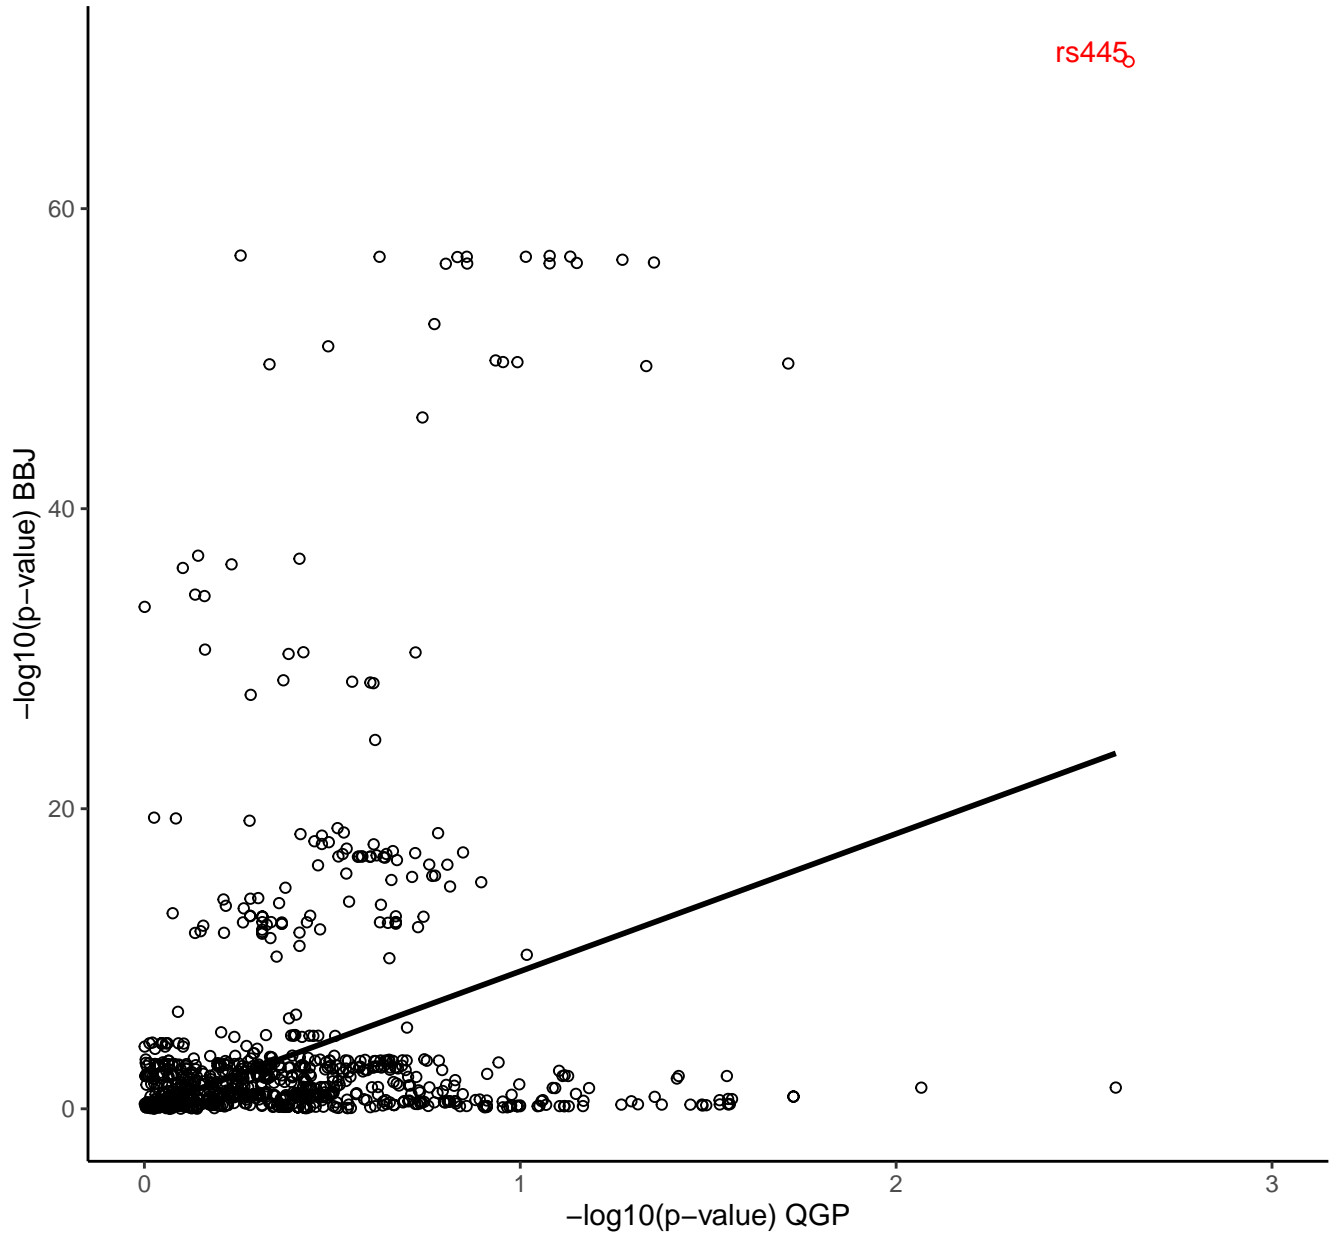

UA rs1260326

nSNPs = 708; H2: 0.465; H3: 0.0124; H4: 0.523

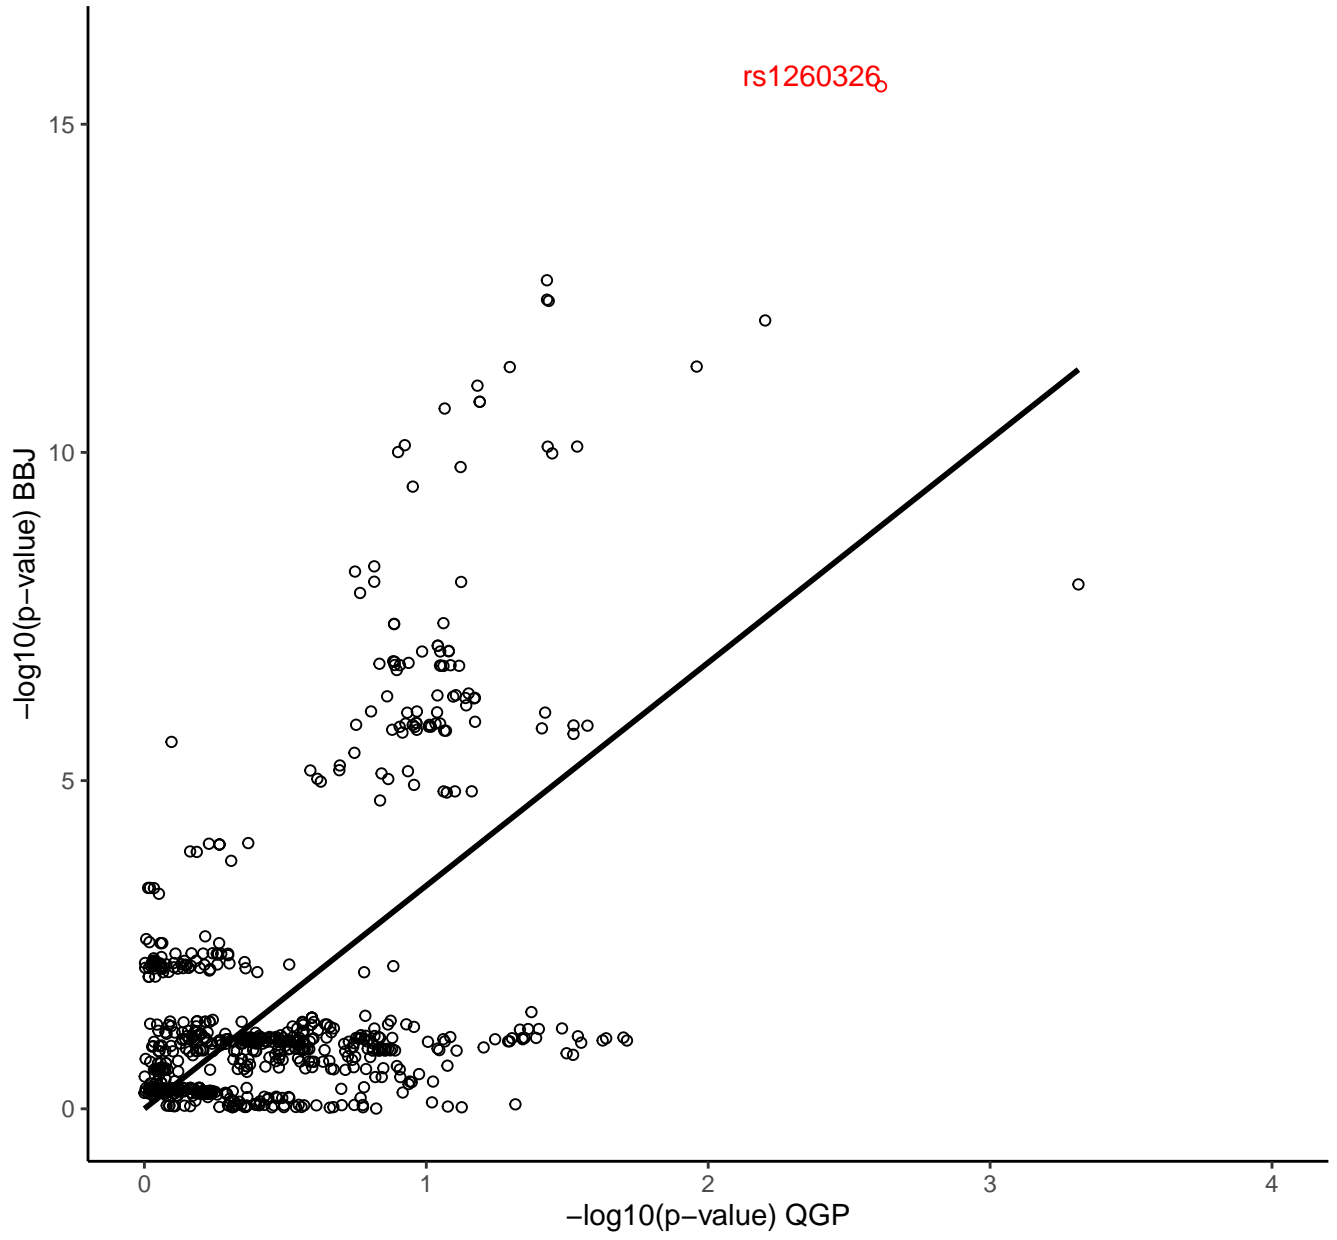



MCH rs1123339

nSNPs = 1213; H2: 0.332; H3: 0.0264; H4: 0.641

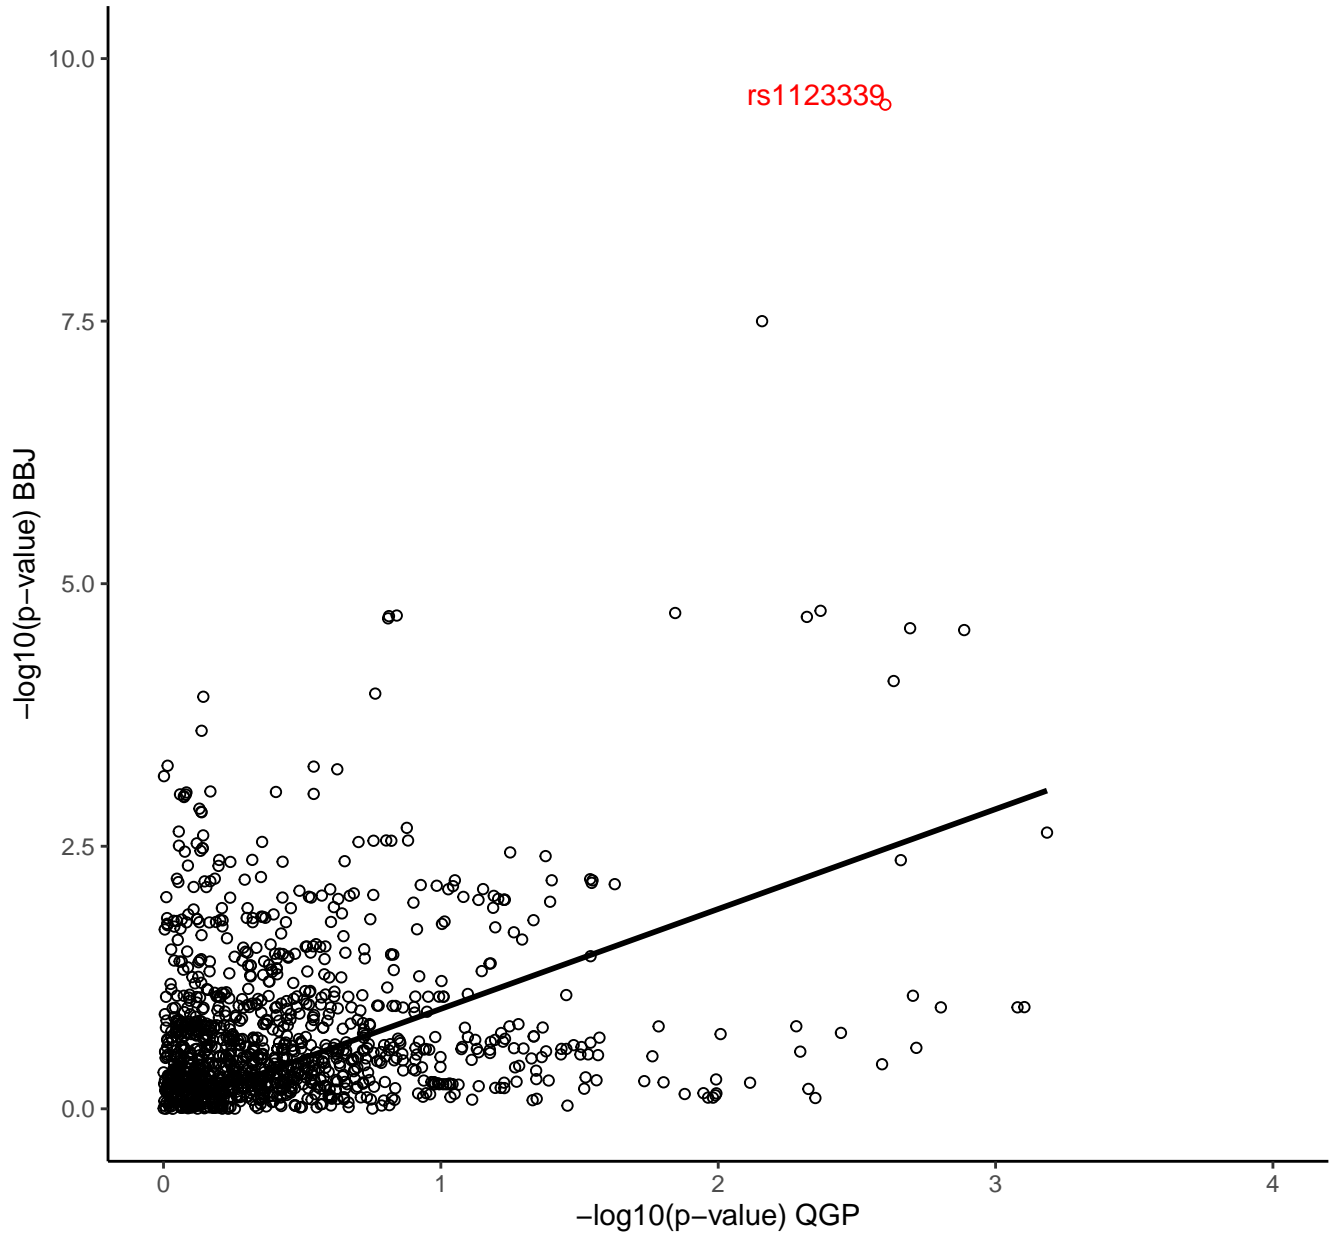

MCV rs1505307

nSNPs = 1823; H2: 0.459; H3: 0.0442; H4: 0.497

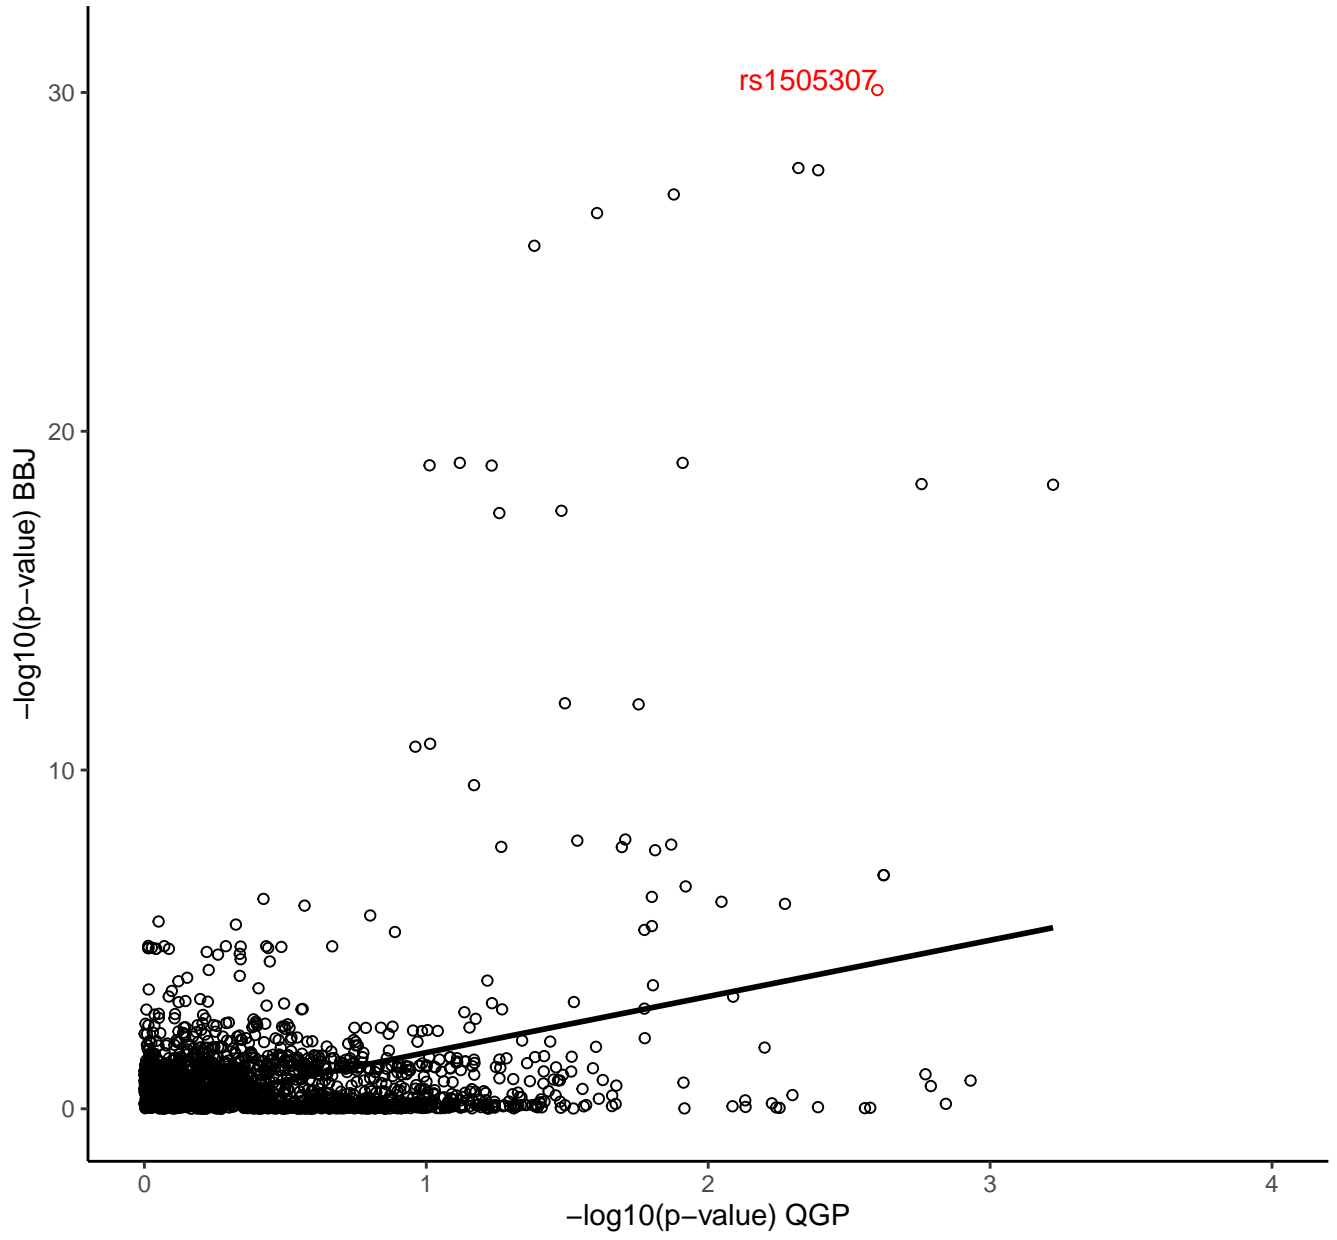

### GGT rs2274685

nSNPs = 1332; H2: 0.211; H3: 0.442; H4: 0.347

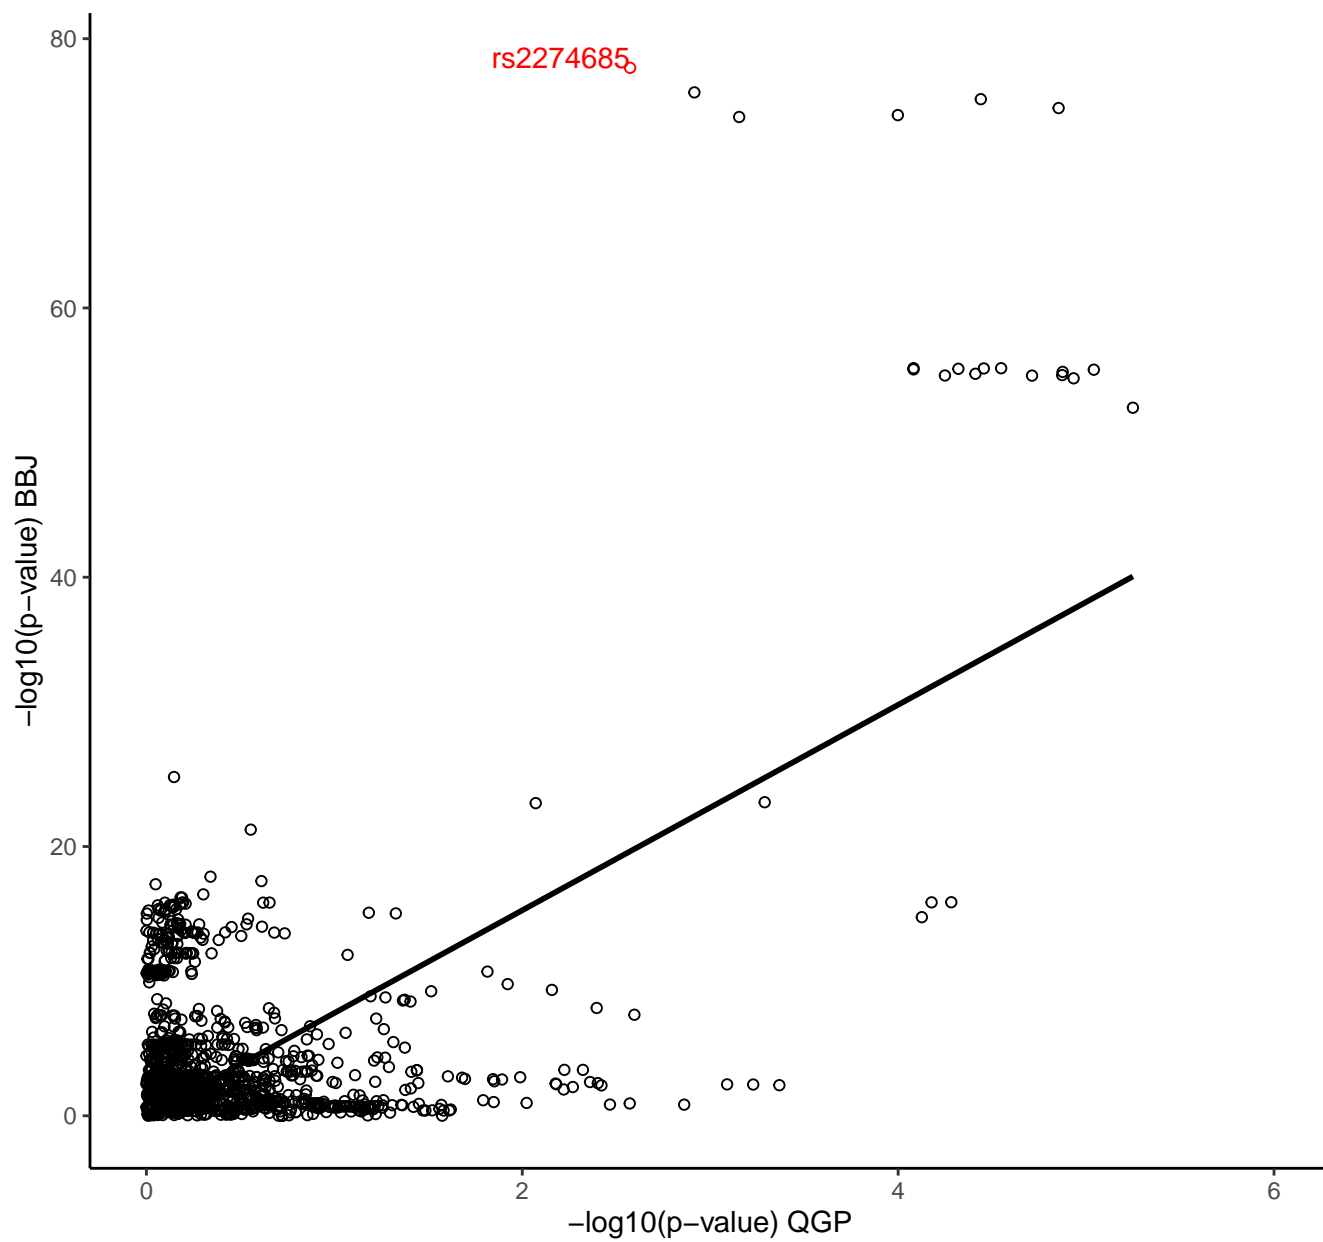

### Hb rs806293

nSNPs = 1489; H2: 0.464; H3: 0.0373; H4: 0.498

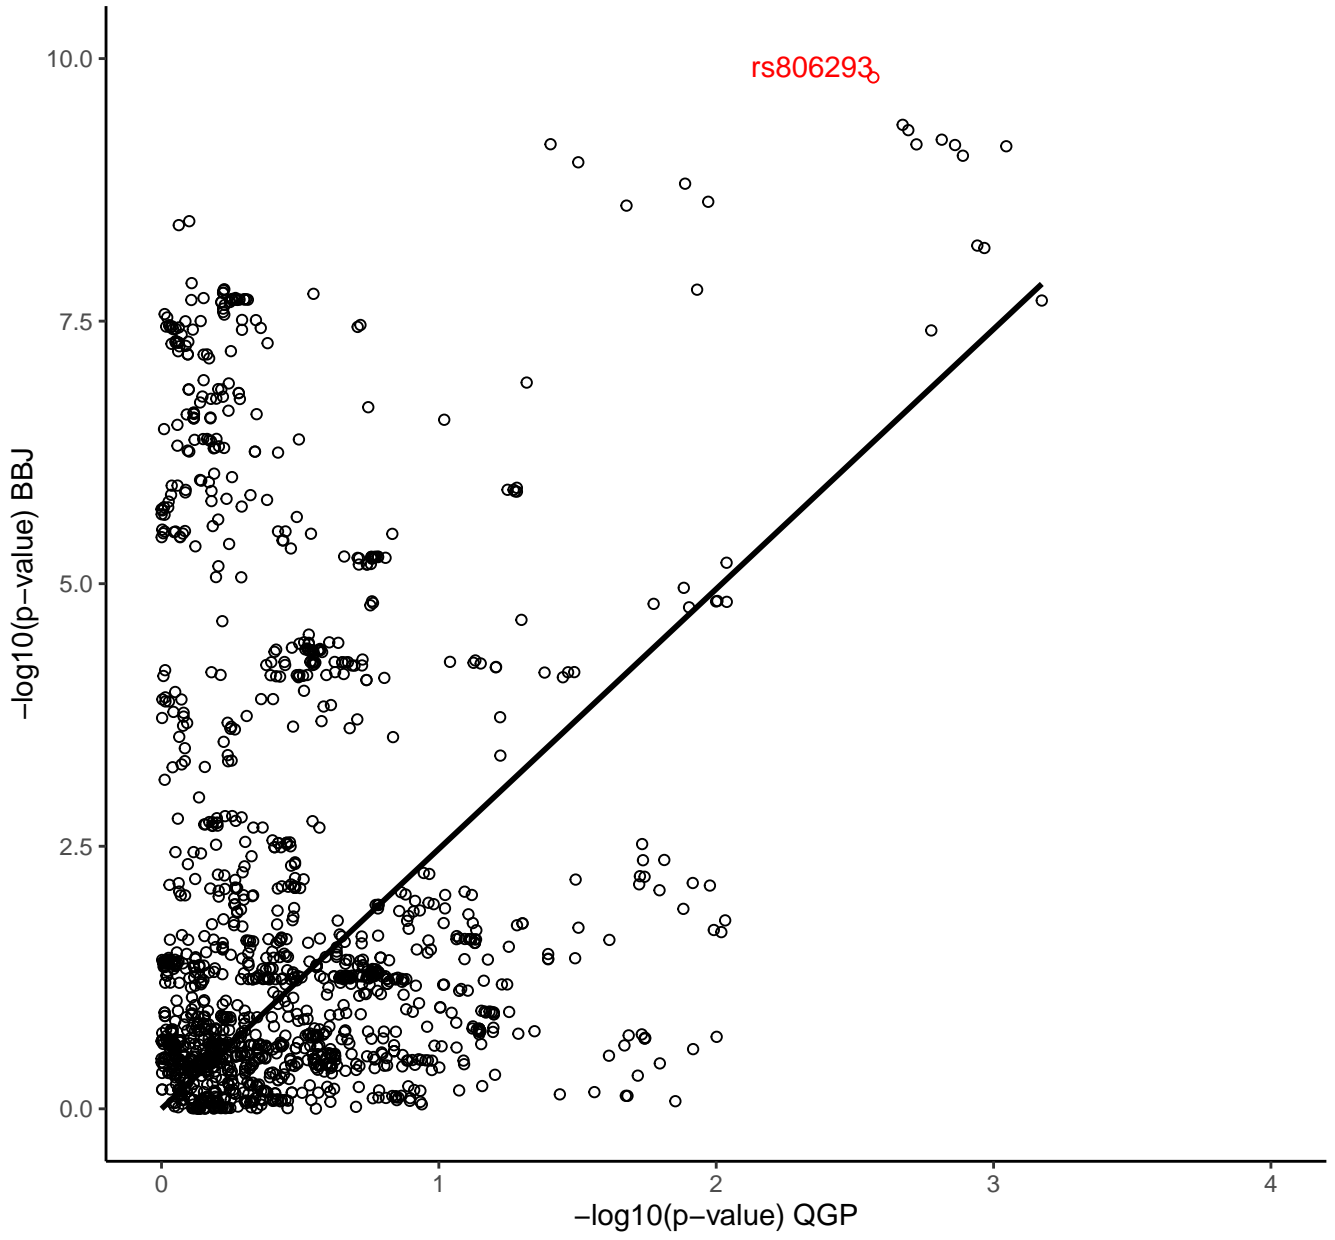

TC rs11748027

nSNPs = 1810; H2: 0.0626; H3: 0.203; H4: 0.735

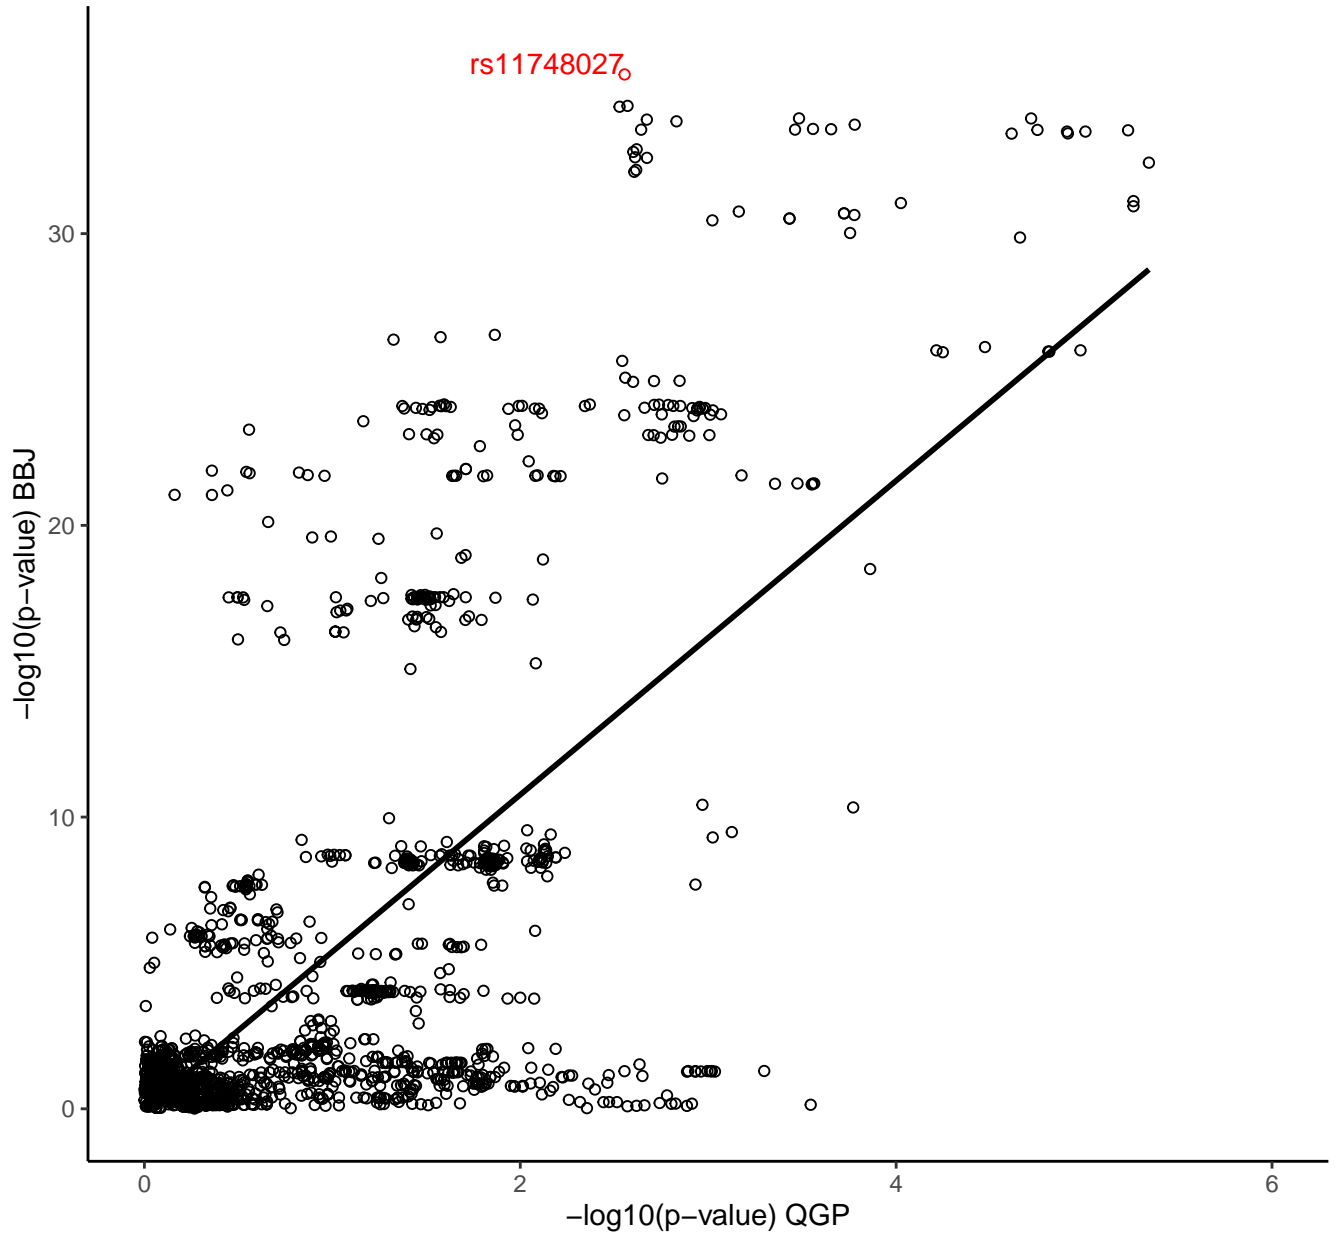

### Ht rs806293

nSNPs = 1489; H2: 0.602; H3: 0.0422; H4: 0.355

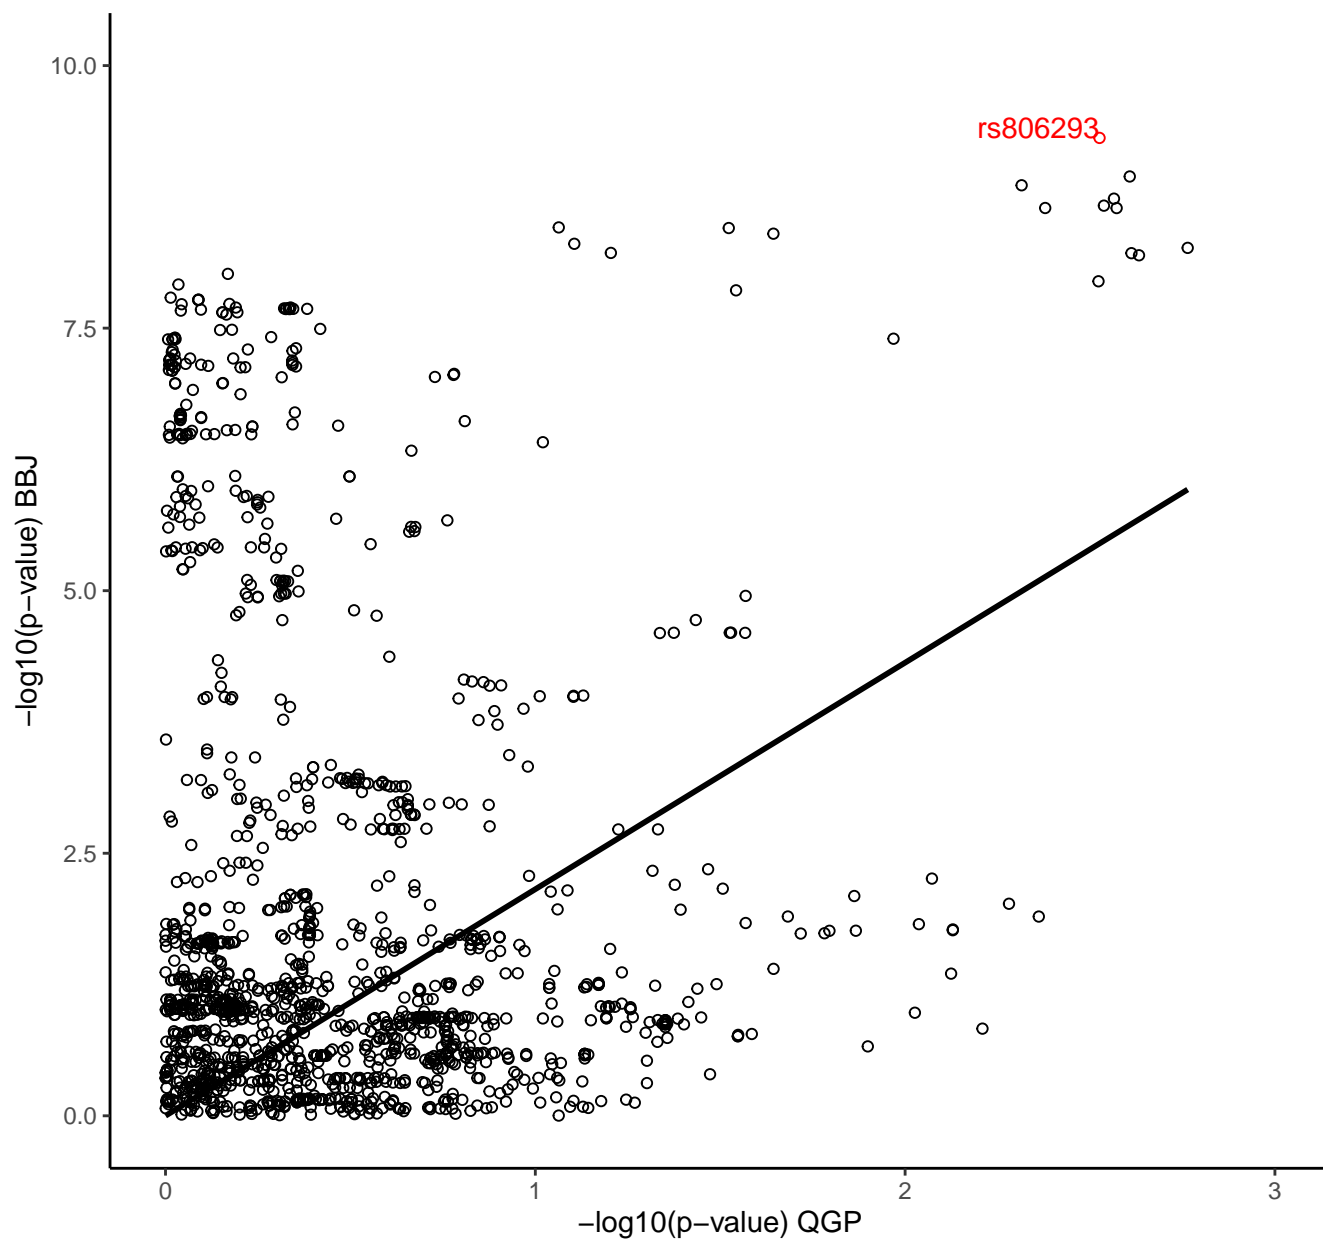

CI rs7215775

nSNPs = 1057; H2: 0.232; H3: 0.0873; H4: 0.681

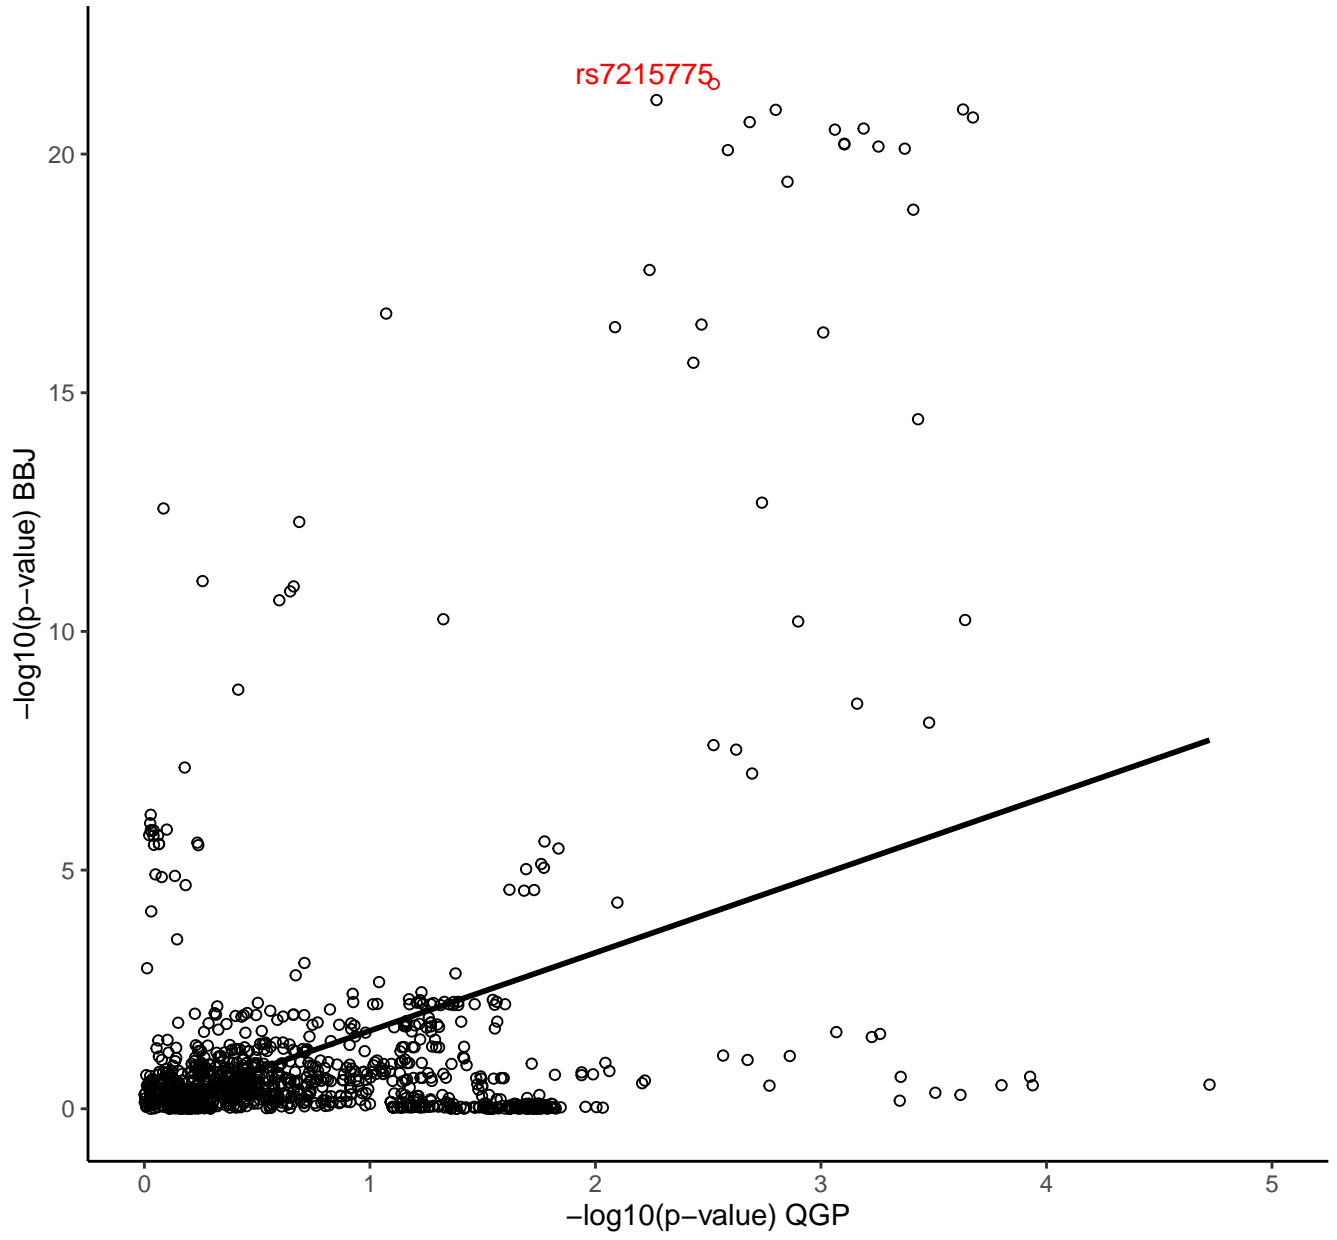

### MCHC rs9901595

nSNPs = 1183; H2: 0.516; H3: 0.0429; H4: 0.441

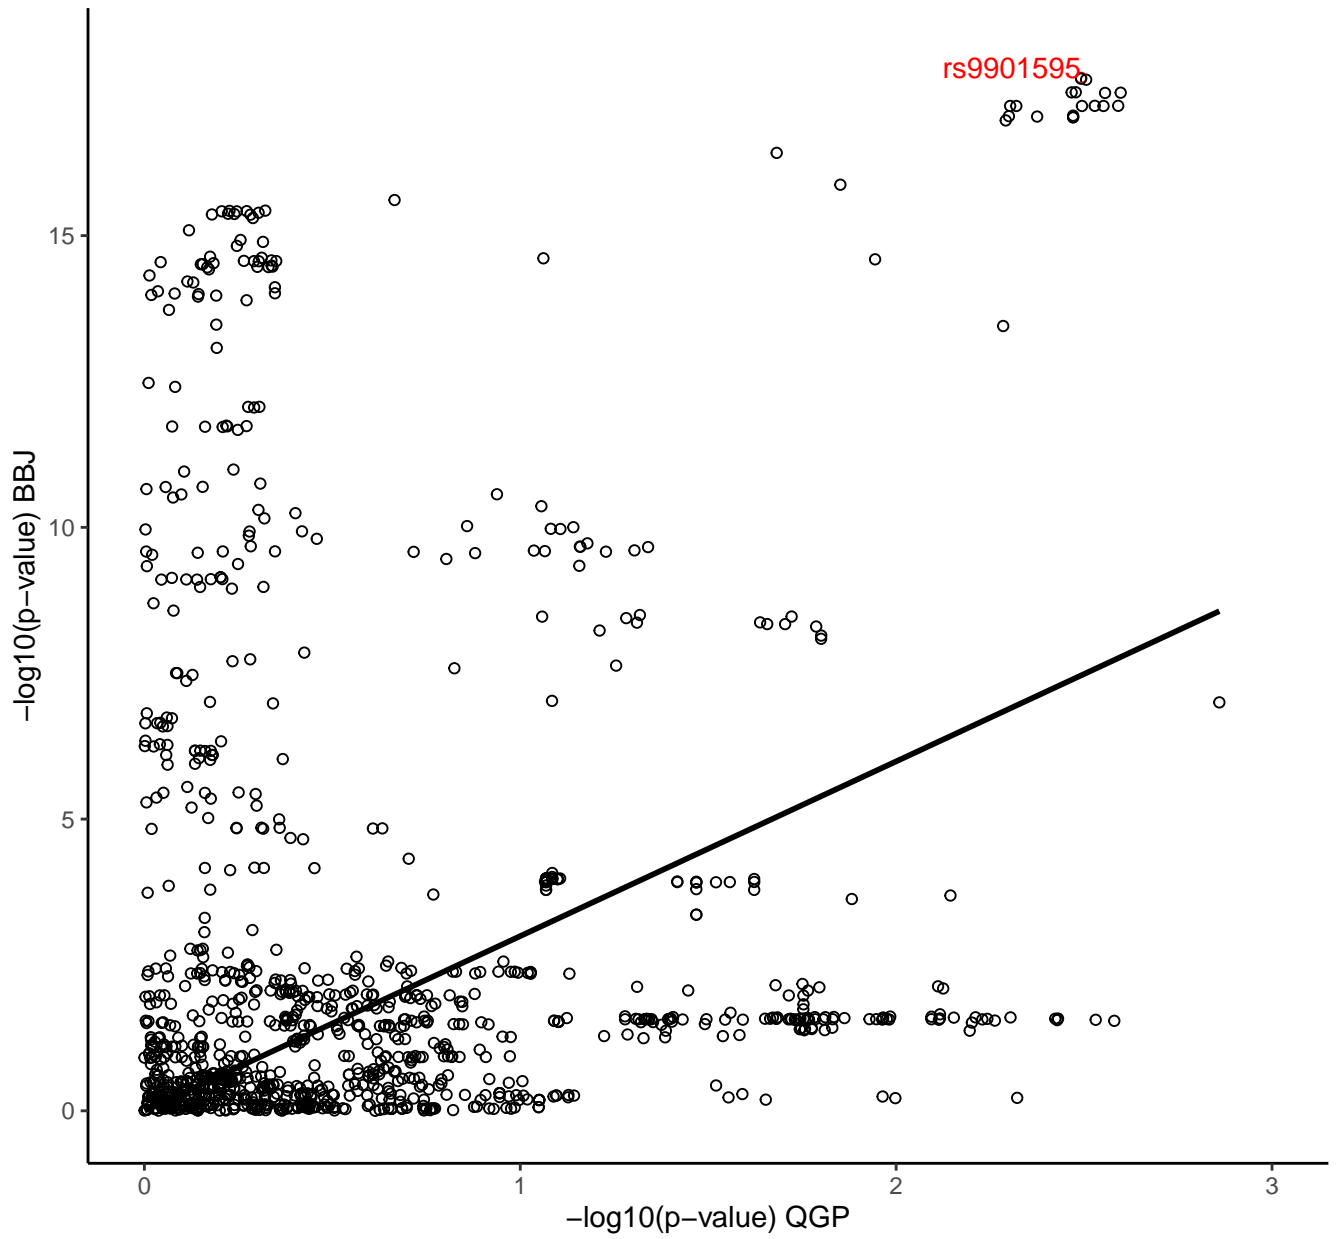



### GGT rs339969

nSNPs = 1735; H2: 0.511; H3: 0.0625; H4: 0.427

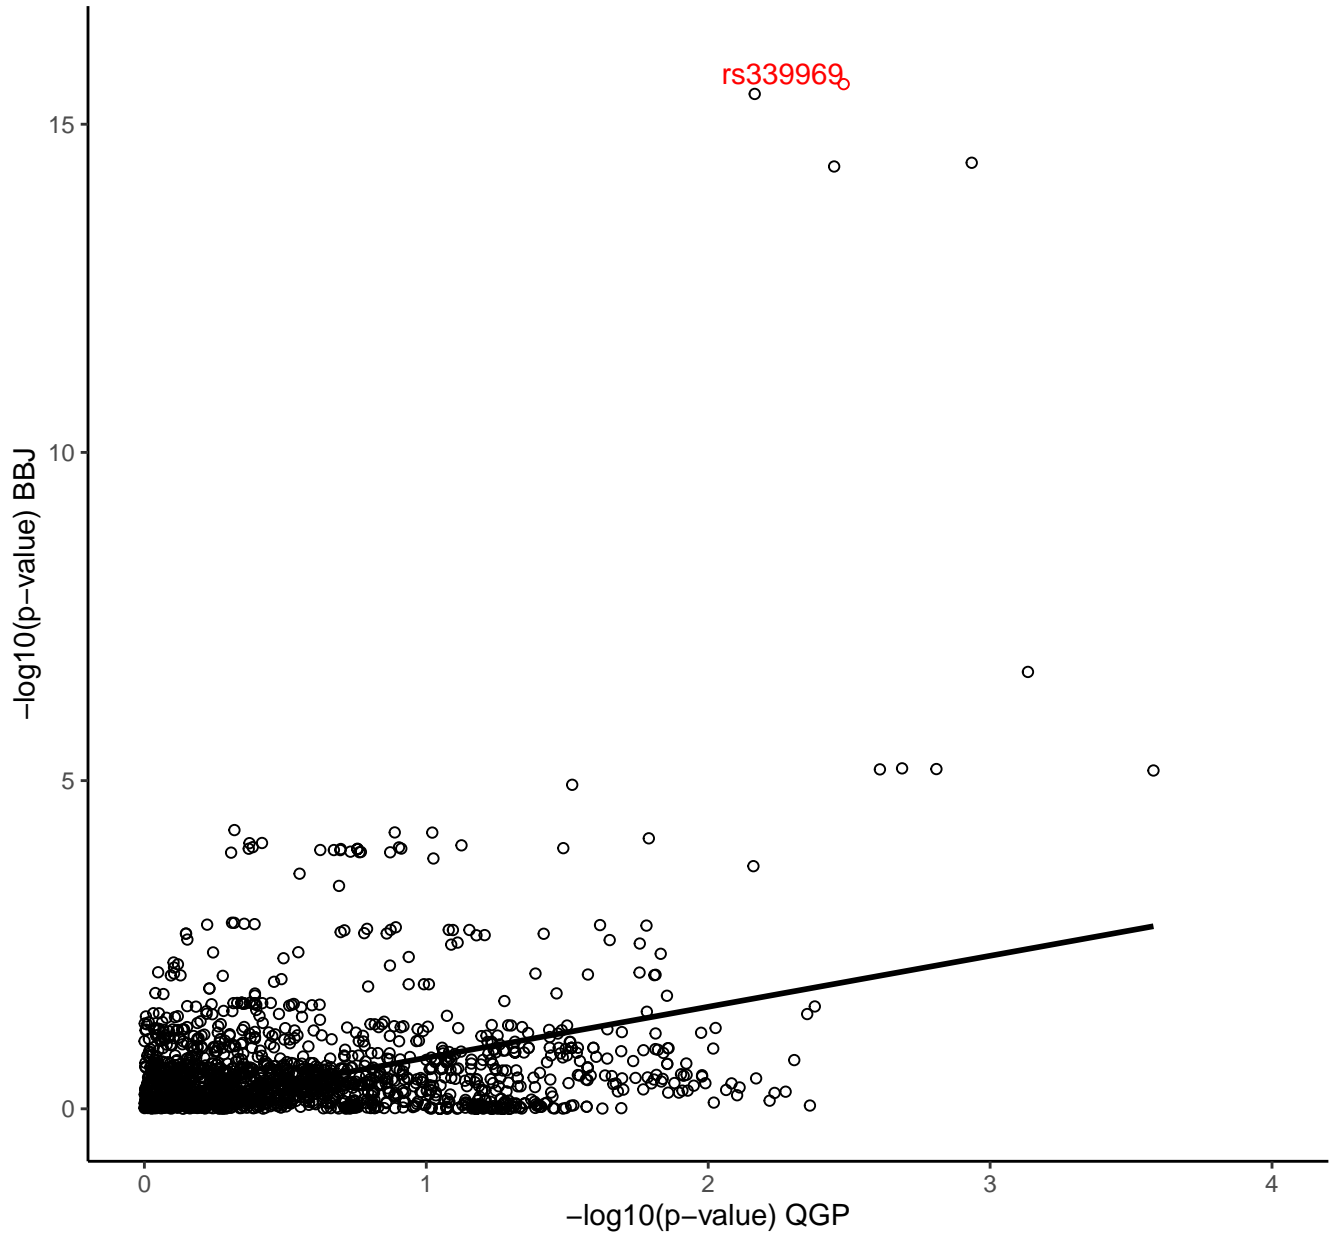

Alb rs1688043

nSNPs = 1936; H2: 0.0584; H3: 0.831; H4: 0.111

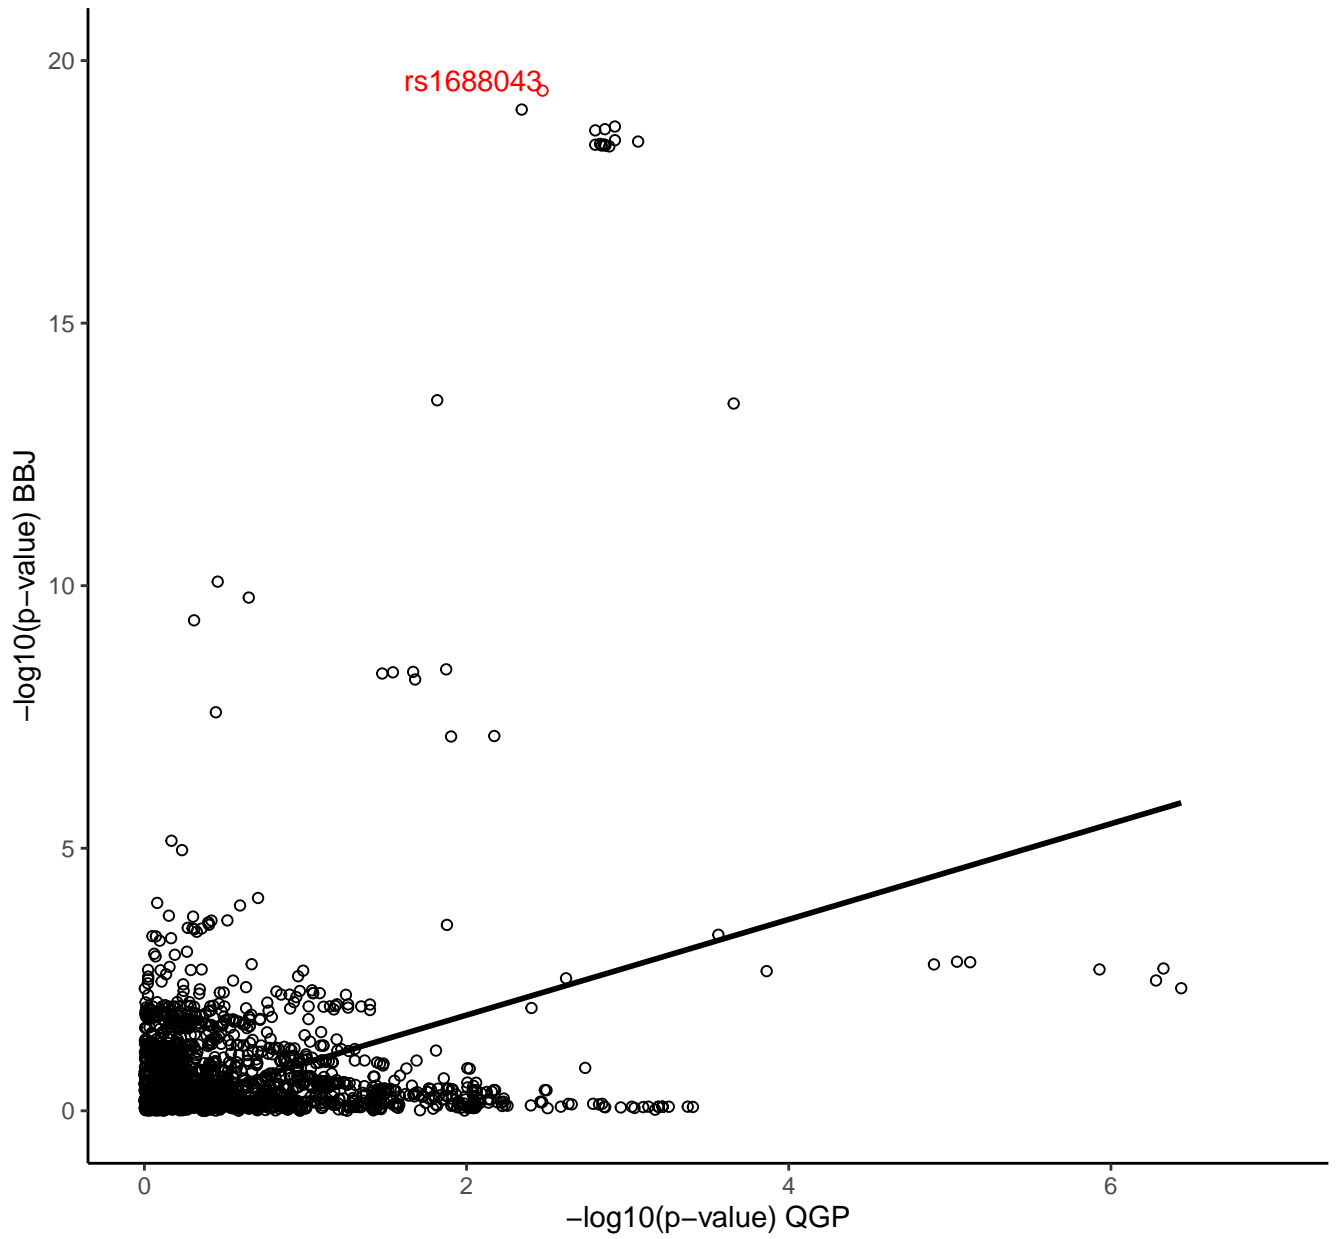

LDL-C rs2001846

nSNPs = 1594; H2: 0.529; H3: 0.108; H4: 0.361

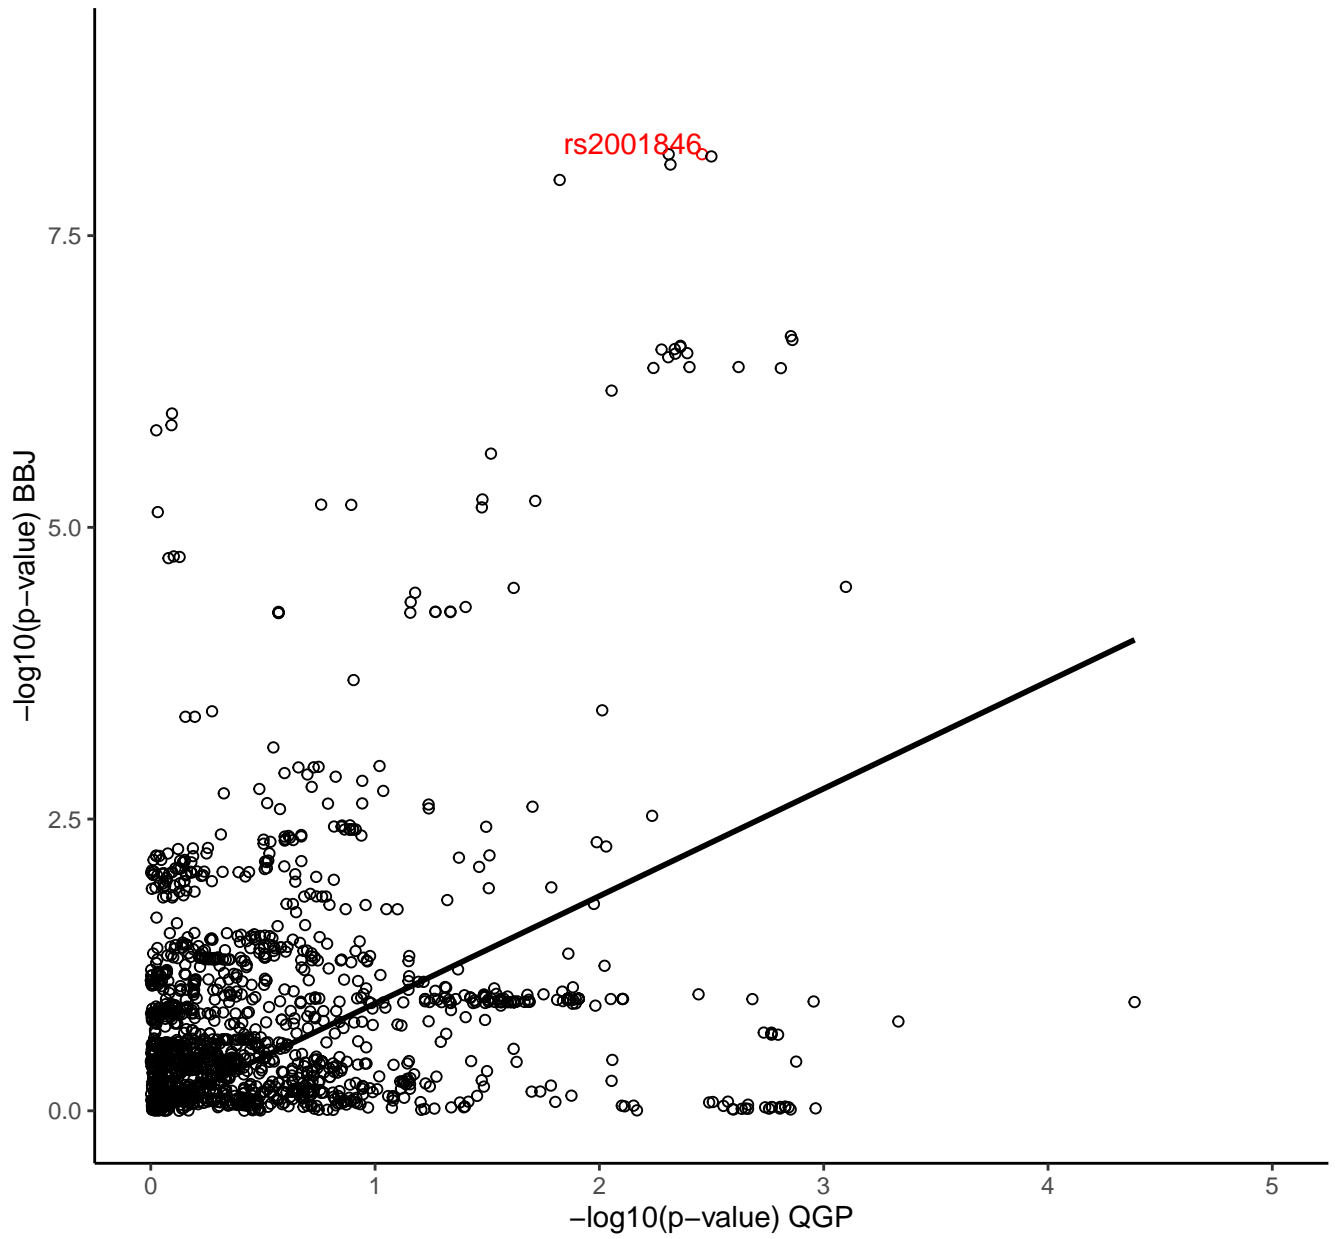

### WBC rs57123607

nSNPs = 1942; H2: 0.579; H3: 0.075; H4: 0.346

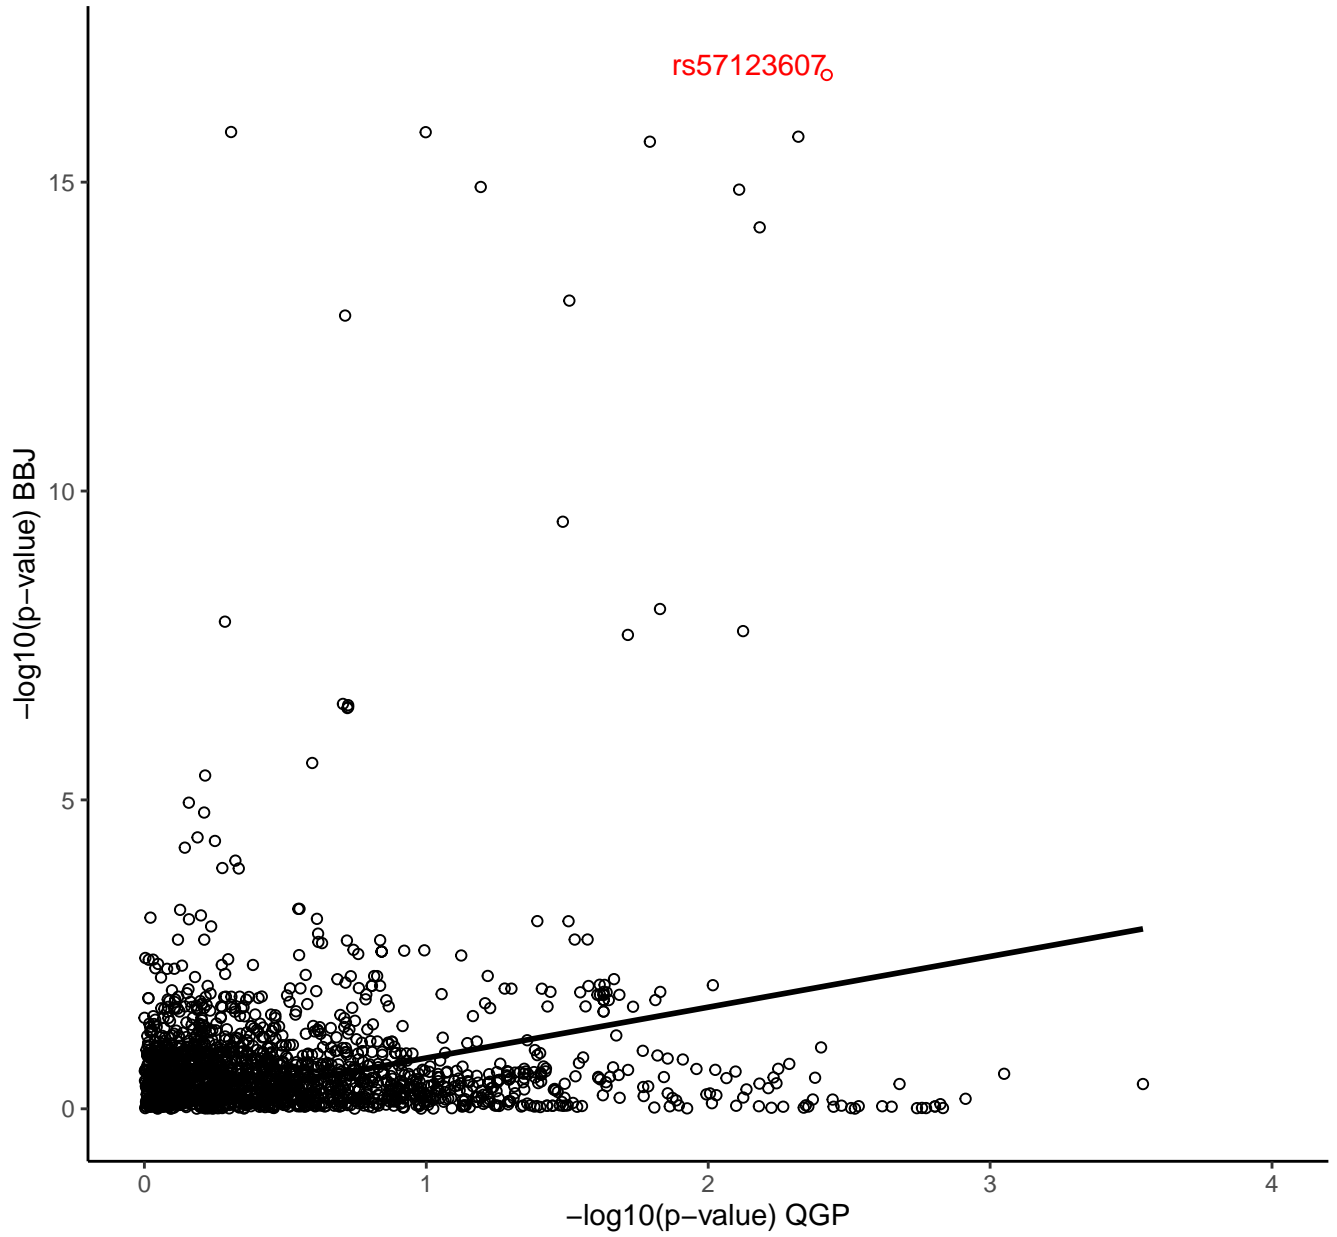

TC rs769446

nSNPs = 1590; H2: 7.75e-10; H3: 1; H4: 0.000358

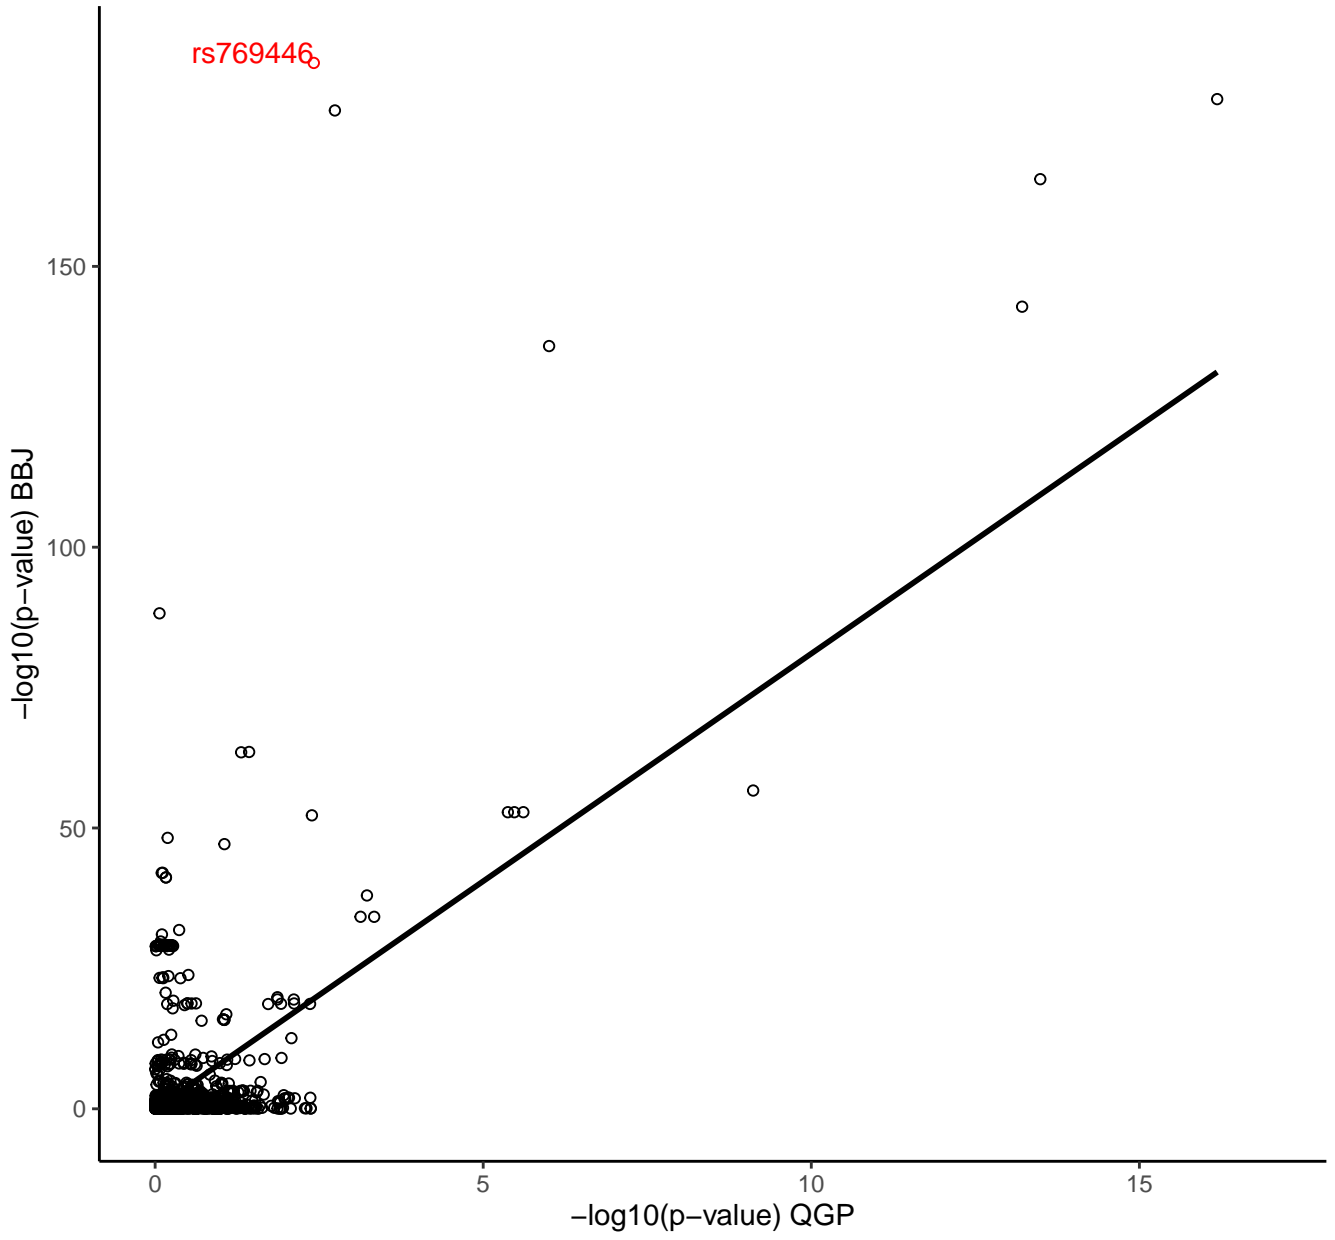

TP rs333947

nSNPs = 1386; H2: 0.524; H3: 0.0301; H4: 0.446

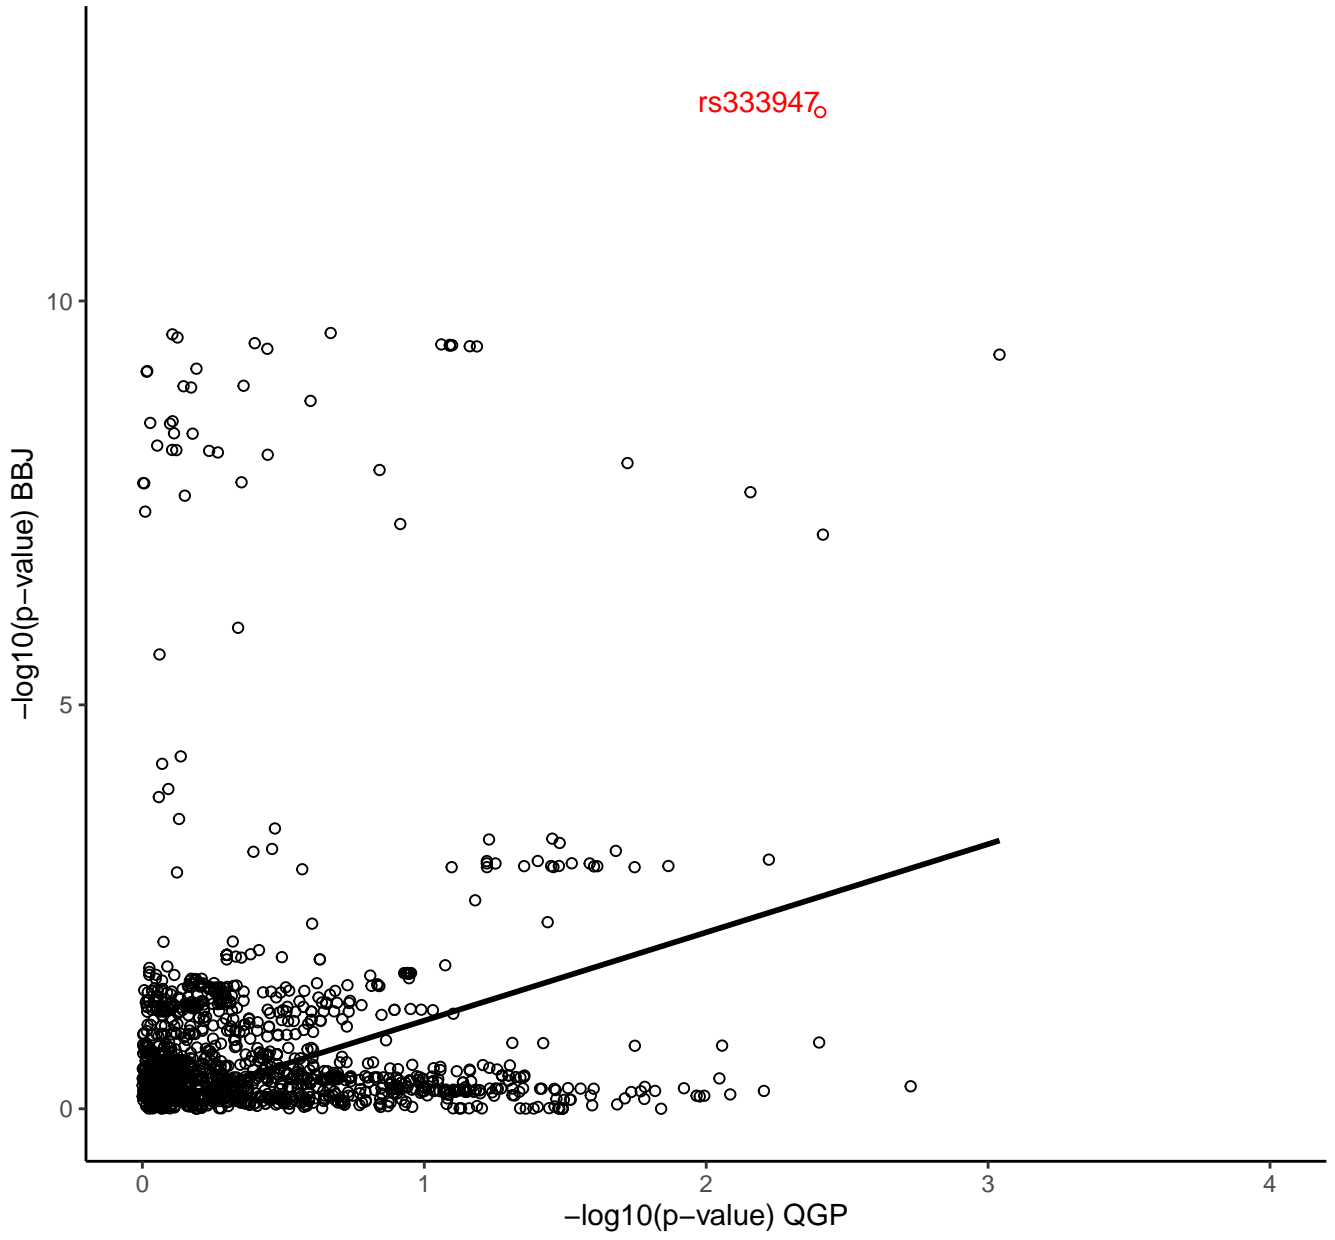

MCV rs1123339

nSNPs = 1213; H2: 0.439; H3: 0.0401; H4: 0.521

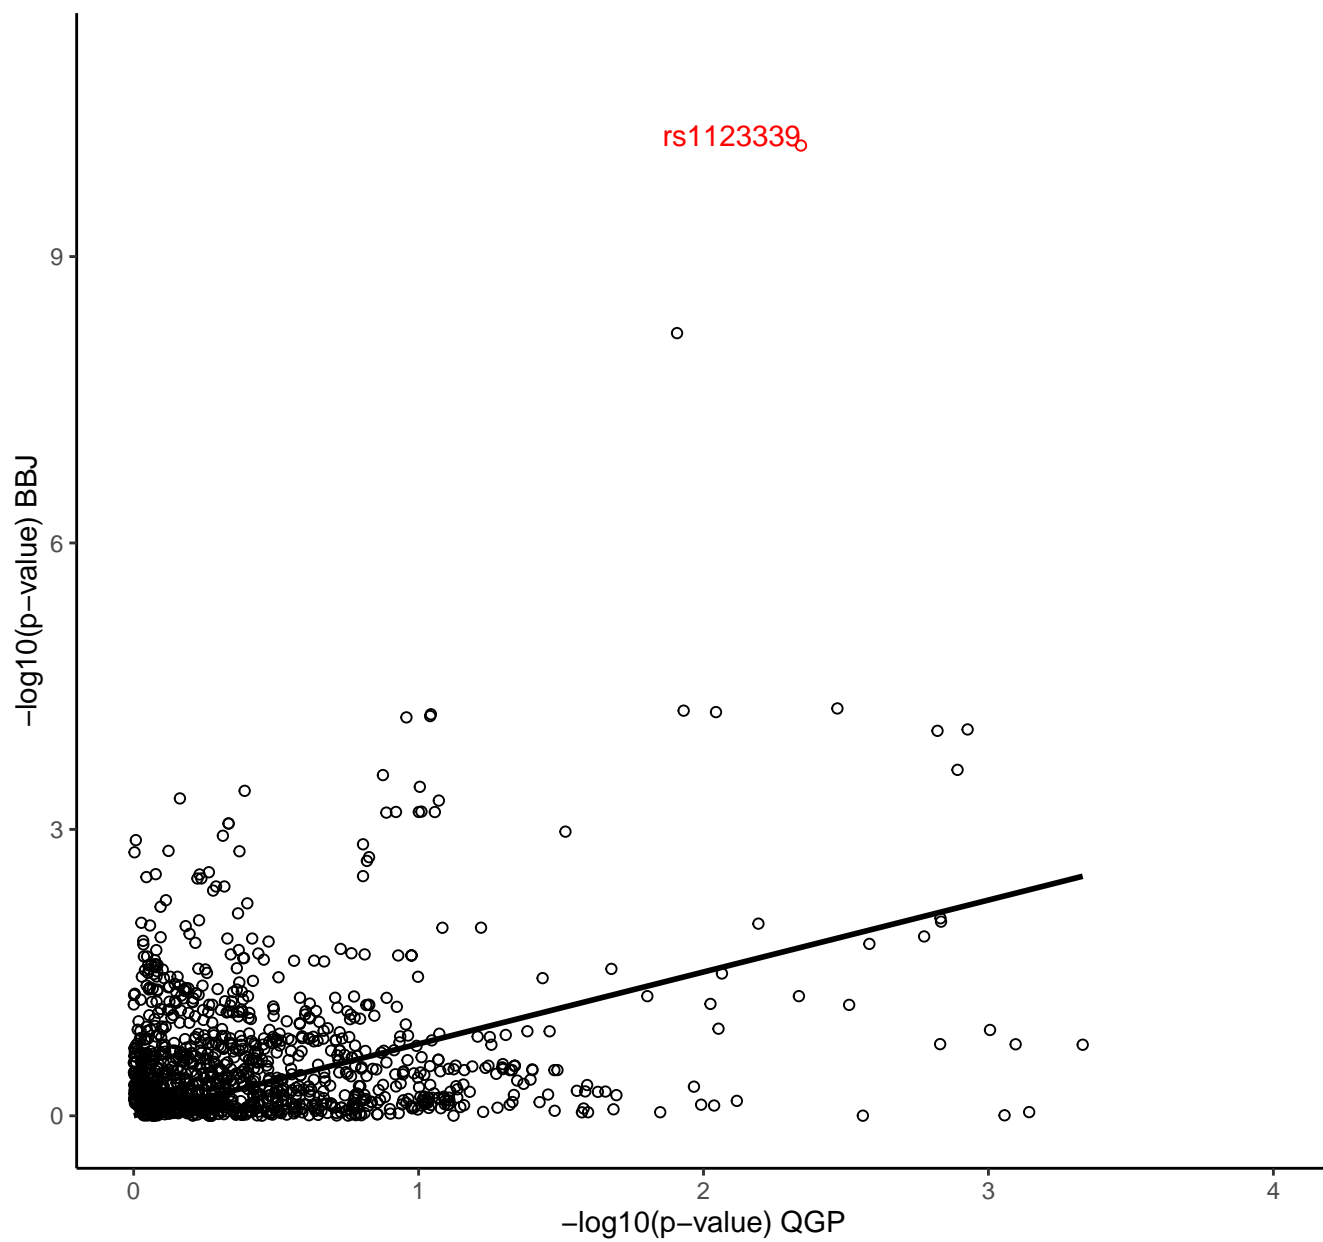

Ht rs8108461

nSNPs = 1474; H2: 0.593; H3: 0.11; H4: 0.297

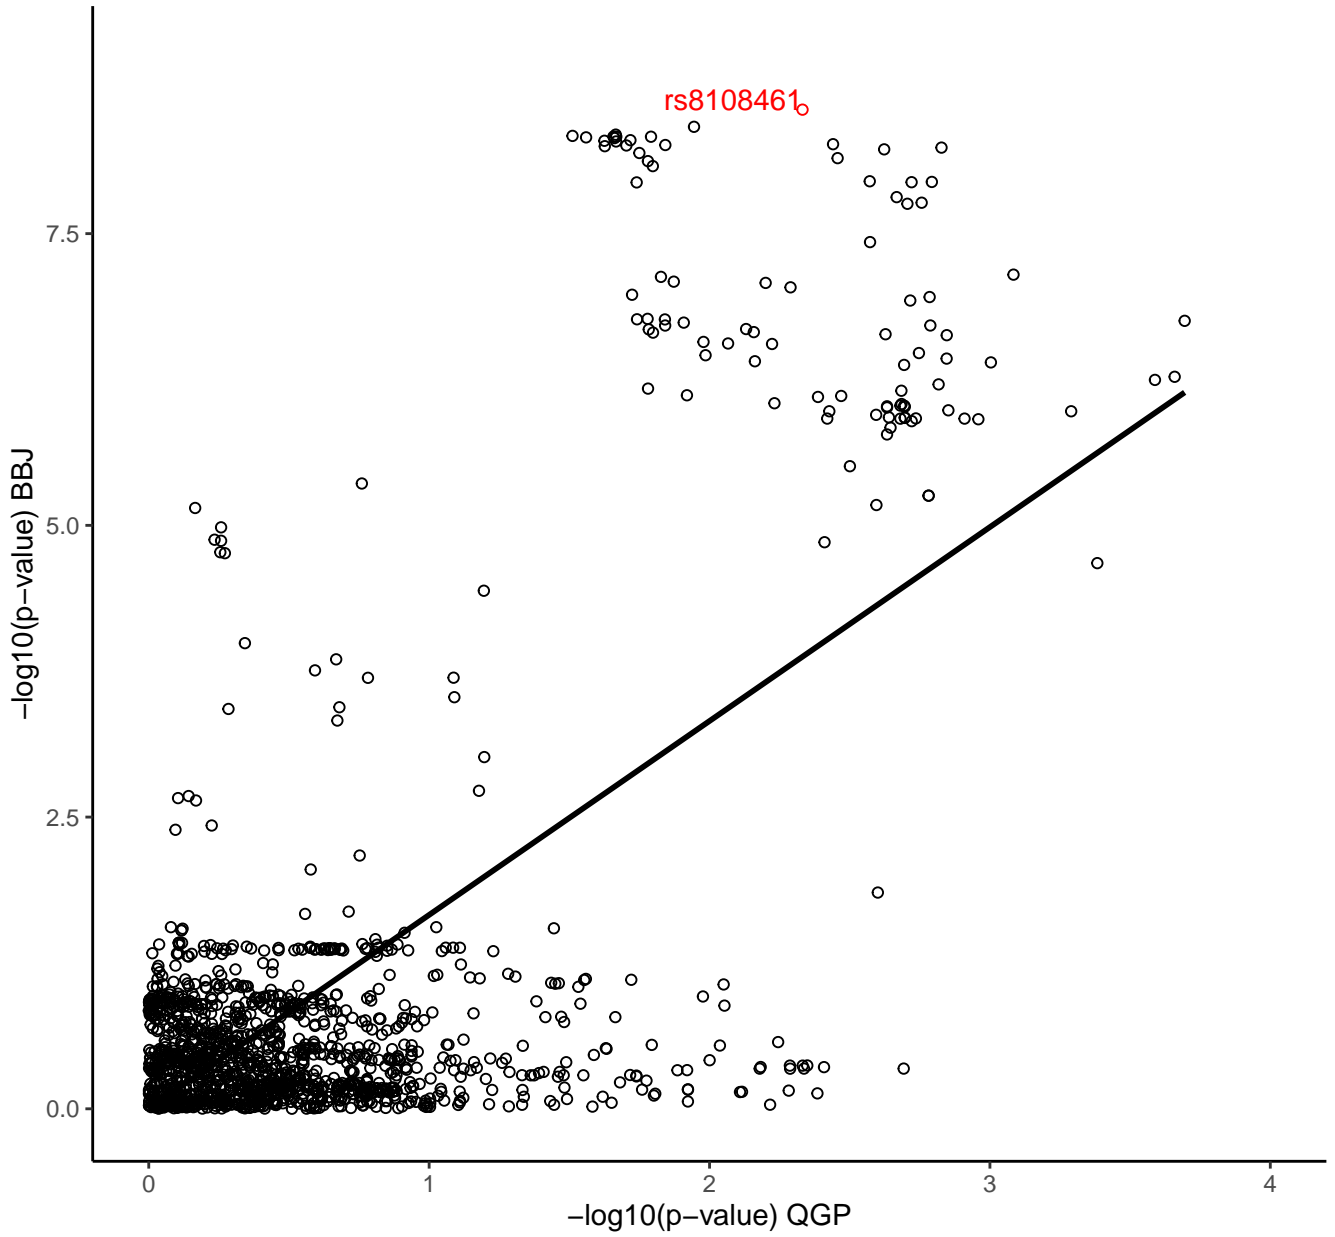



### MCHC rs3811444

nSNPs = 1998; H2: 0.658; H3: 0.06; H4: 0.282

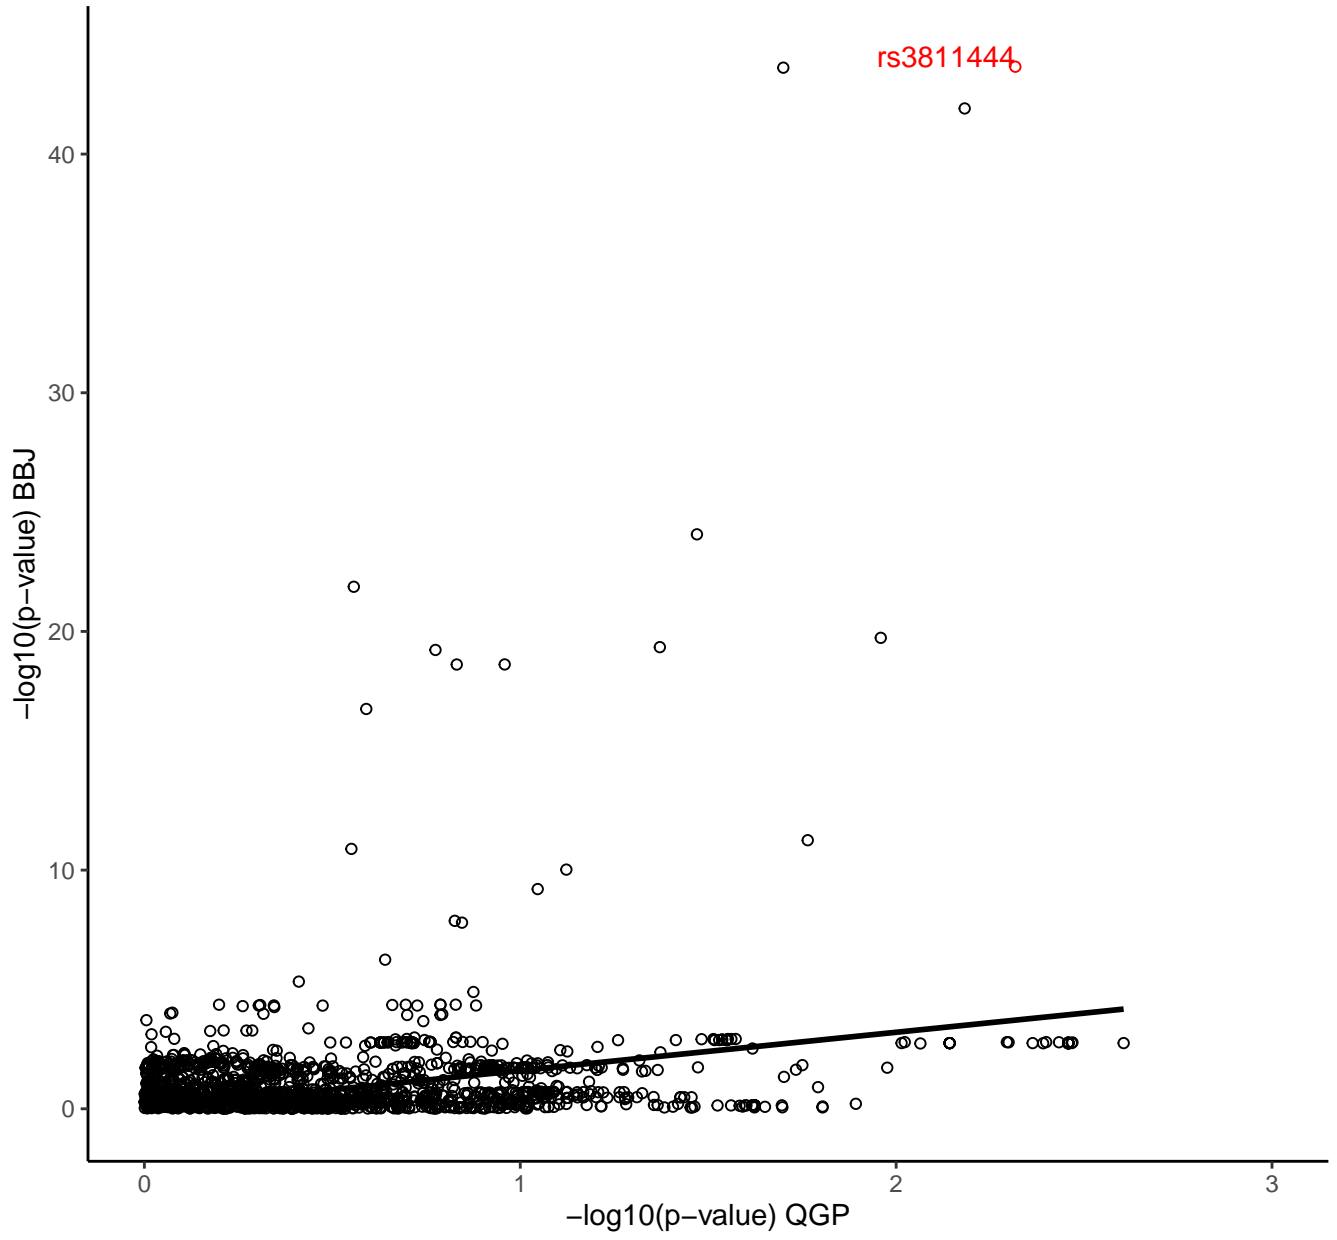

MCV rs628751

nSNPs = 1597; H2: 0.275; H3: 0.0636; H4: 0.662

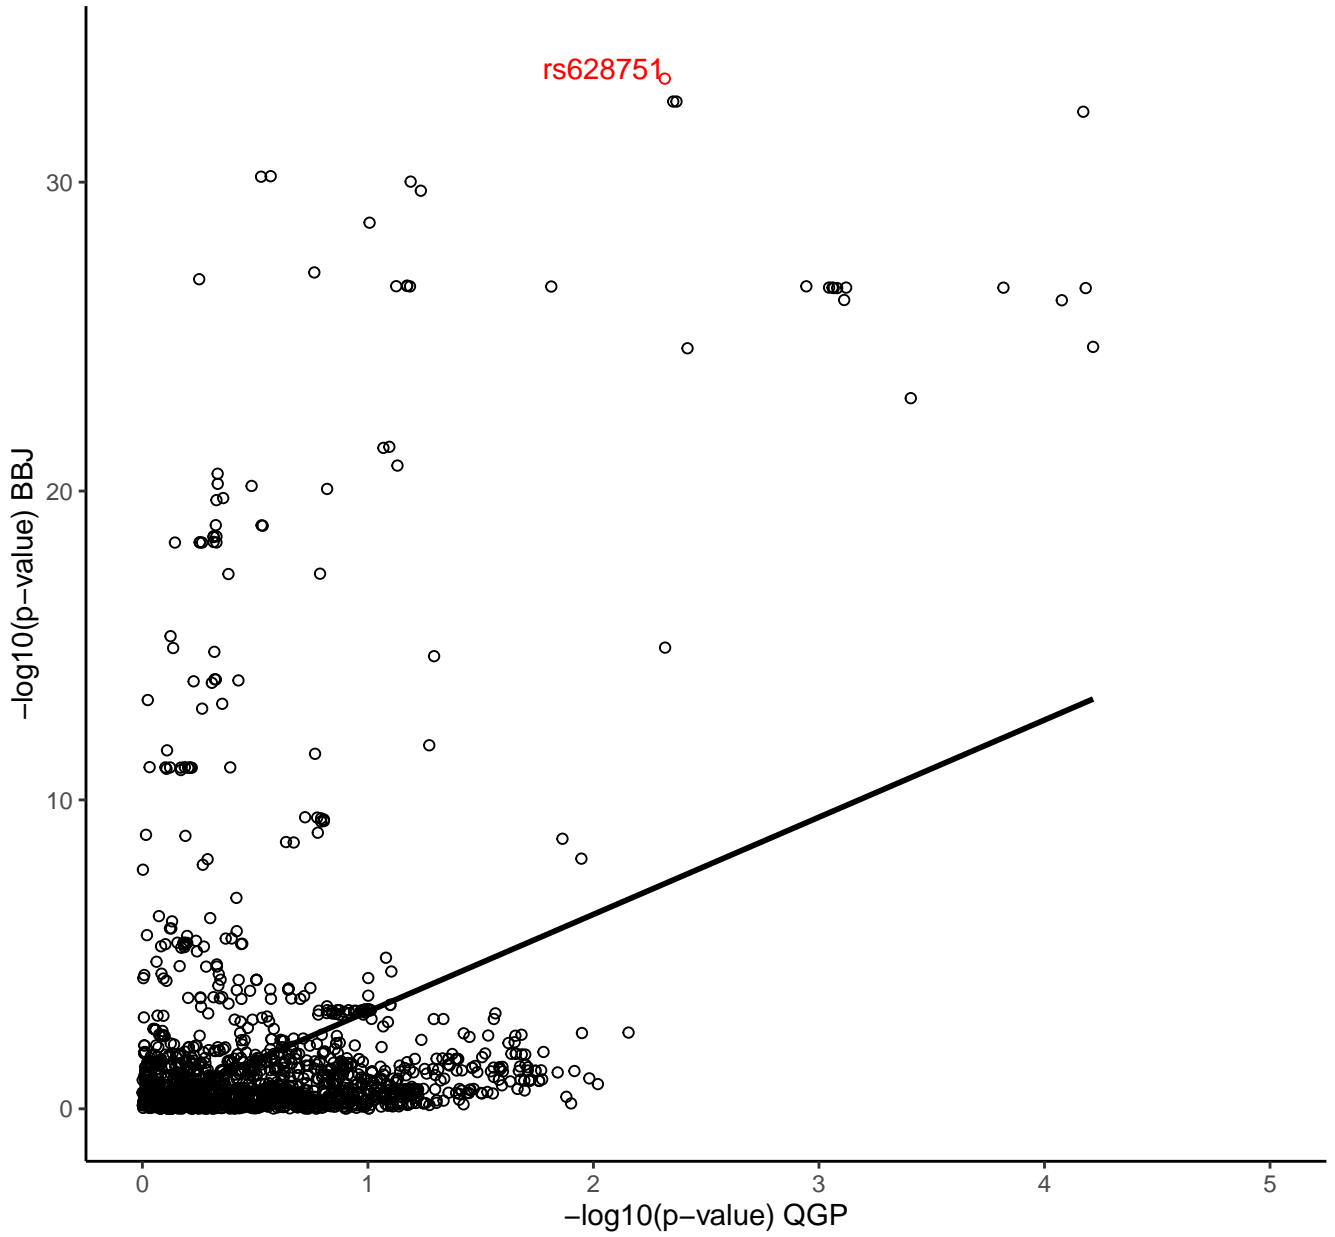

PT rs1313566

nSNPs = 705; H2: 0.608; H3: 0.038; H4: 0.354

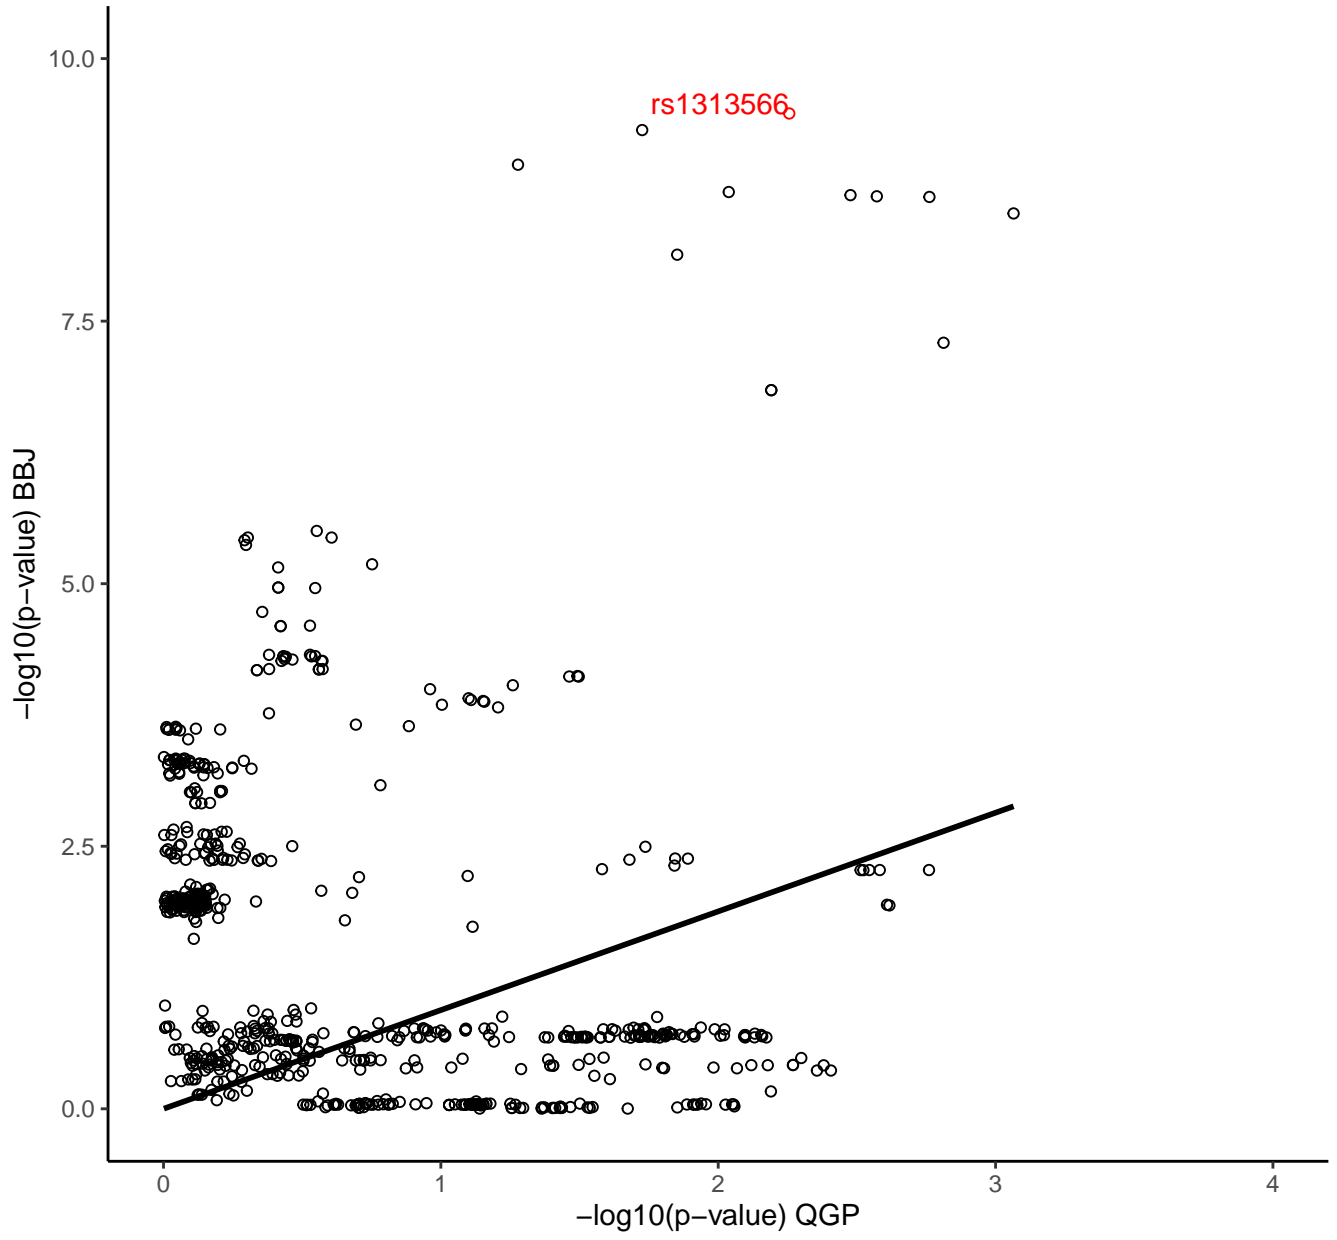

TG rs2144300

nSNPs = 1846; H2: 0.636; H3: 0.0588; H4: 0.286

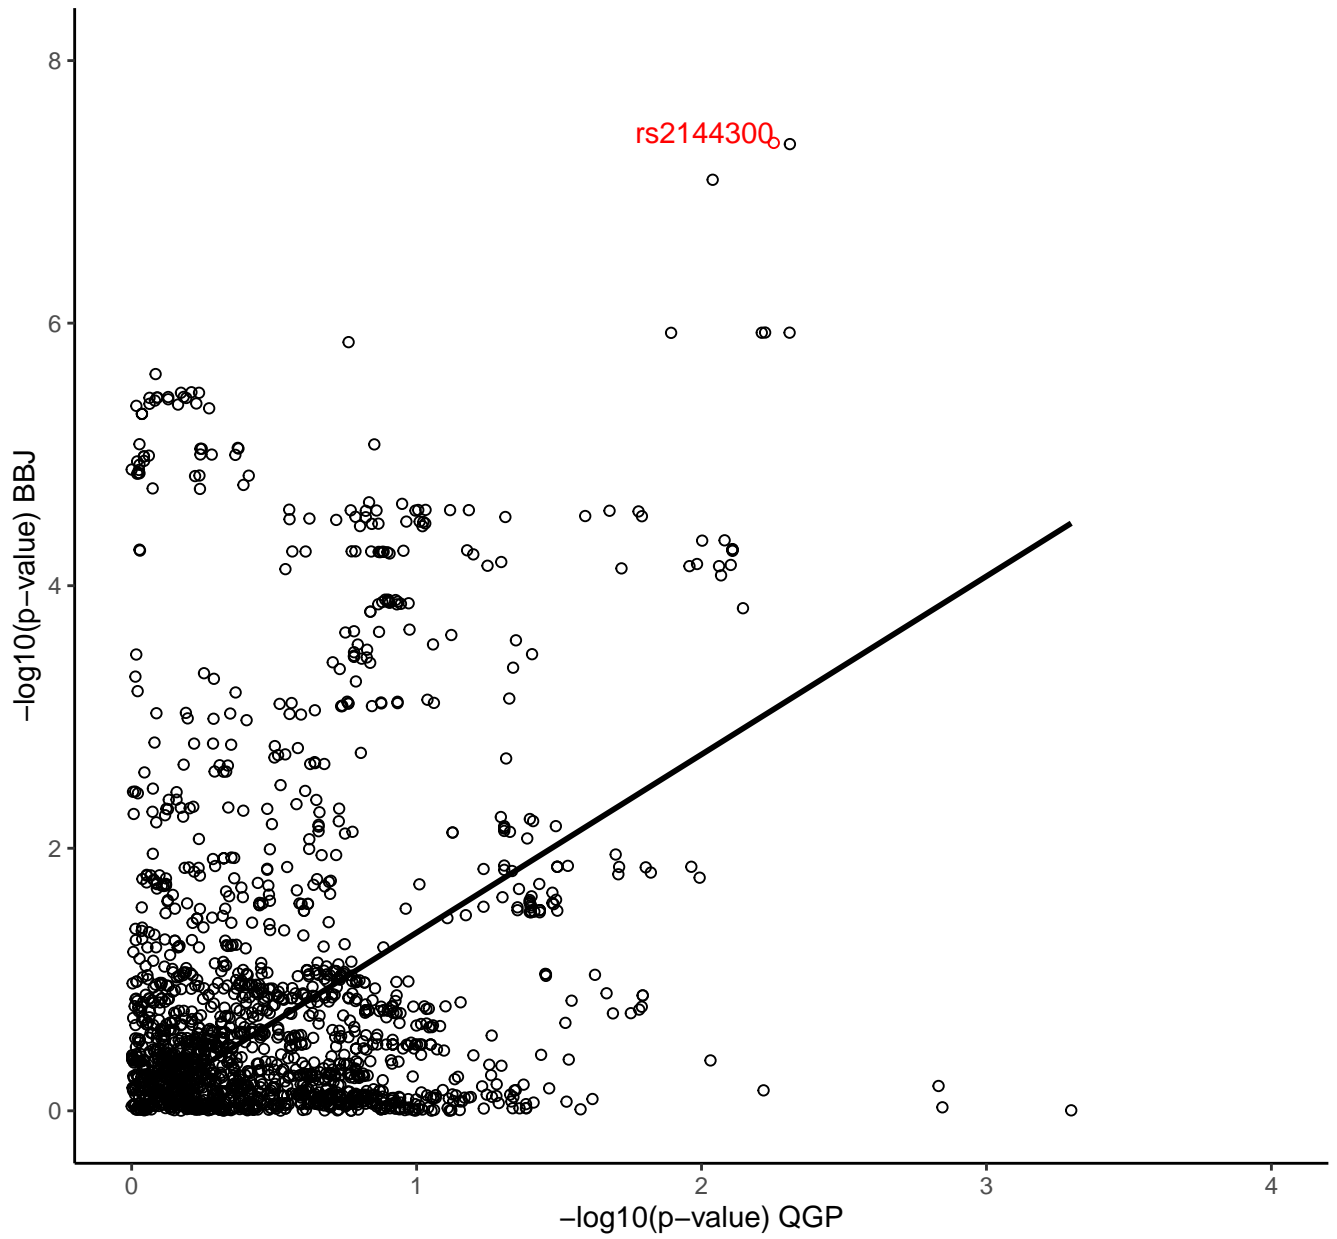

ALP rs9533177

nSNPs = 2081; H2: 0.619; H3: 0.0598; H4: 0.322

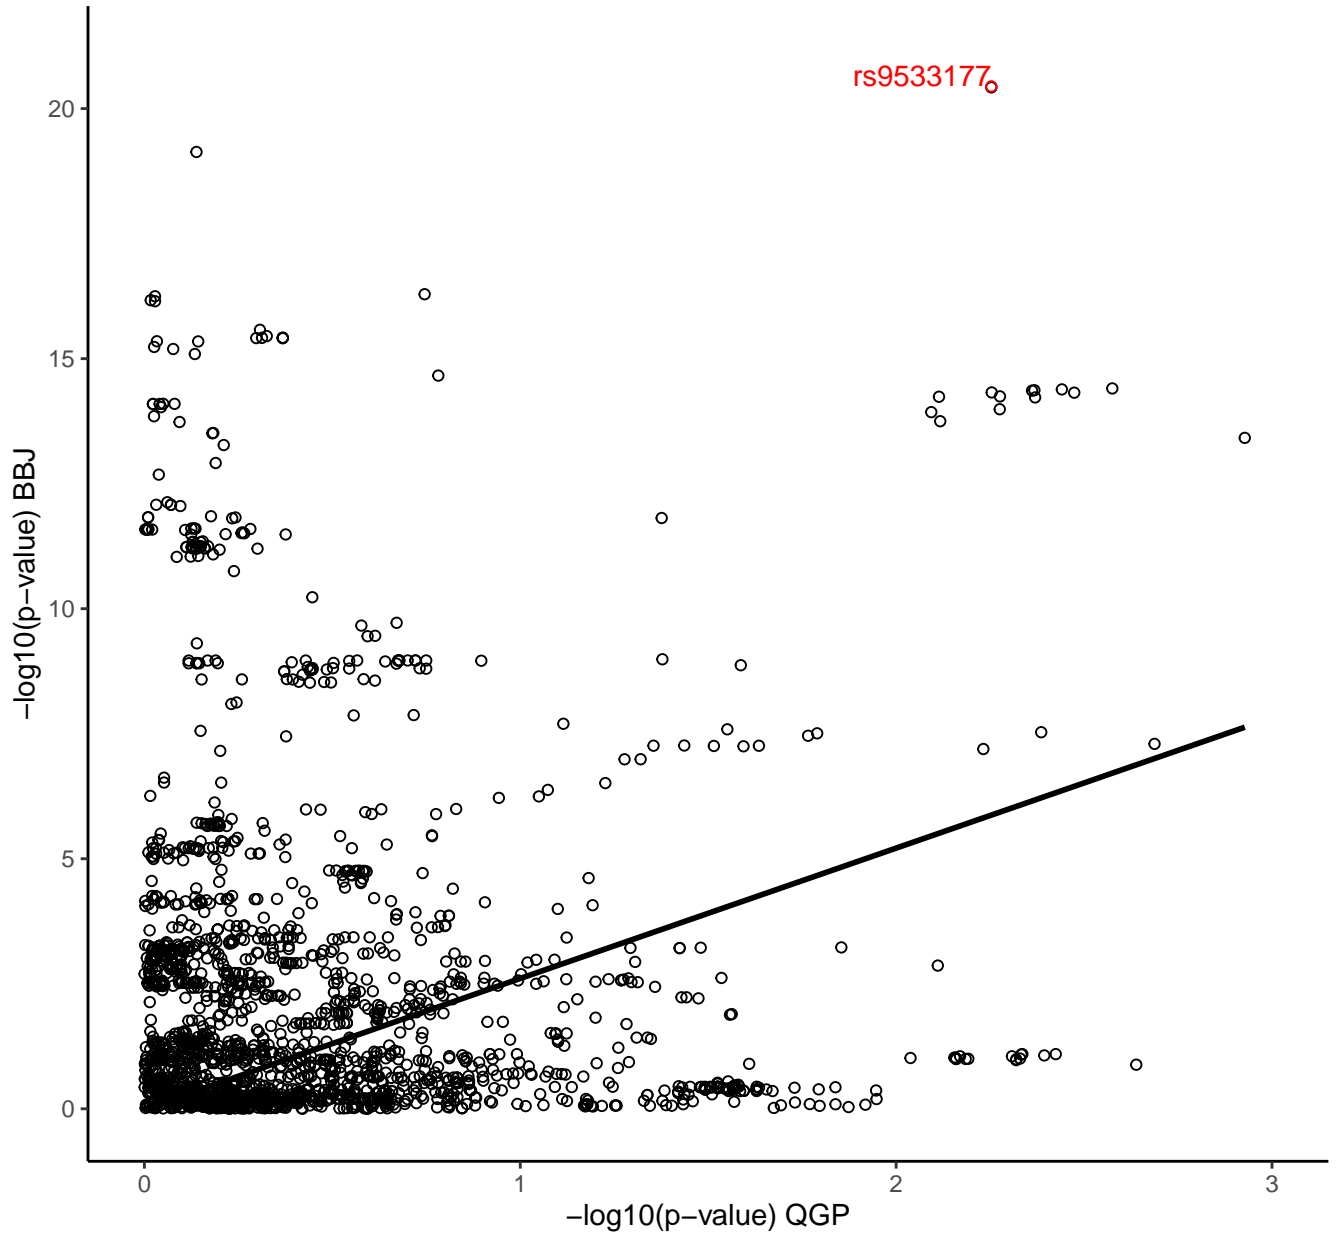

PT rs927826

nSNPs = 2599; H2: 0.391; H3: 0.339; H4: 0.27

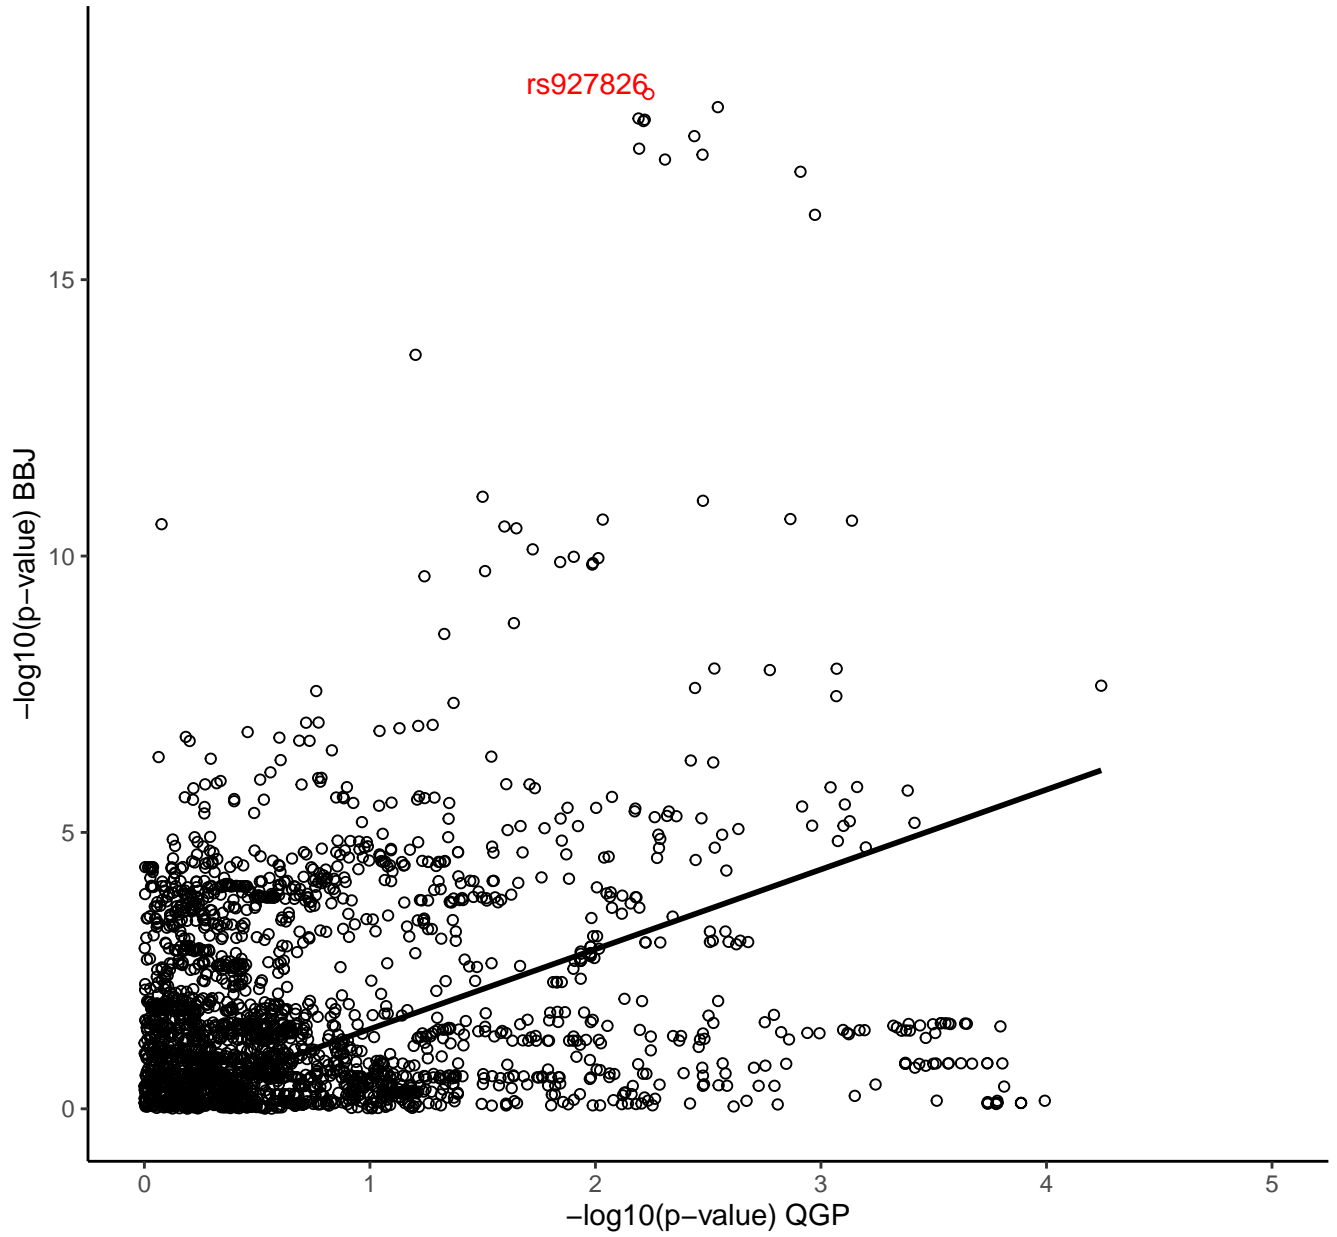

MCV rs737092

nSNPs = 2114; H2: 0.61; H3: 0.0944; H4: 0.295

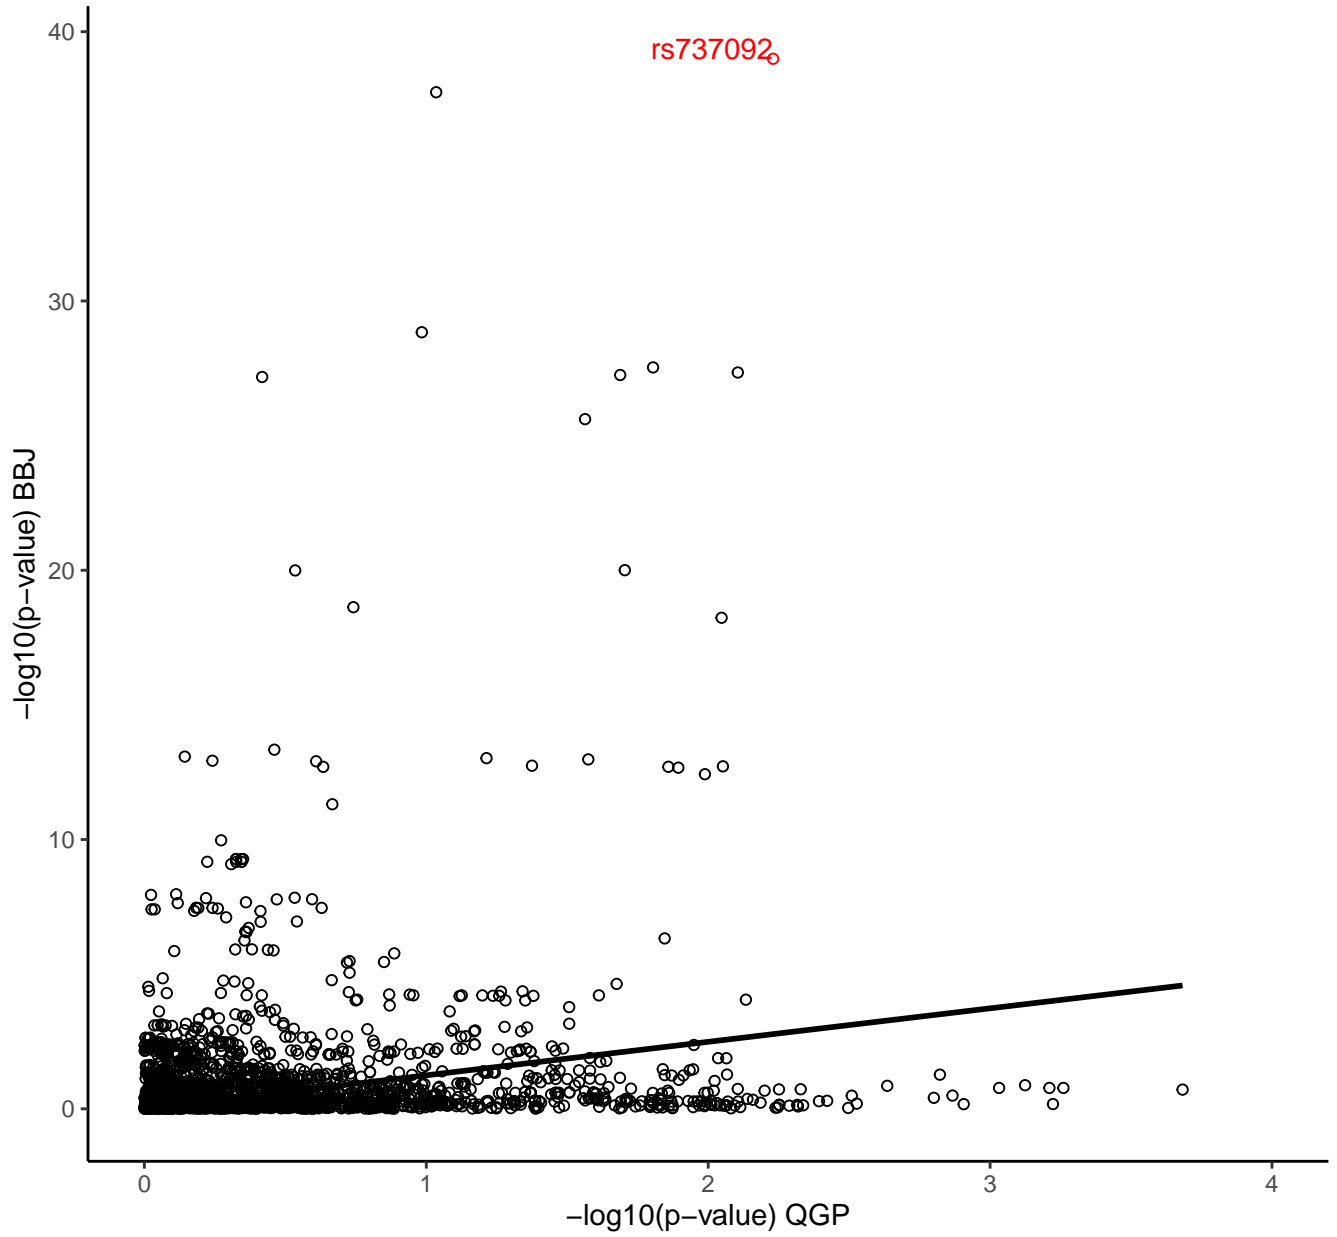

MCH rs1505307

nSNPs = 1823; H2: 0.69; H3: 0.0459; H4: 0.264

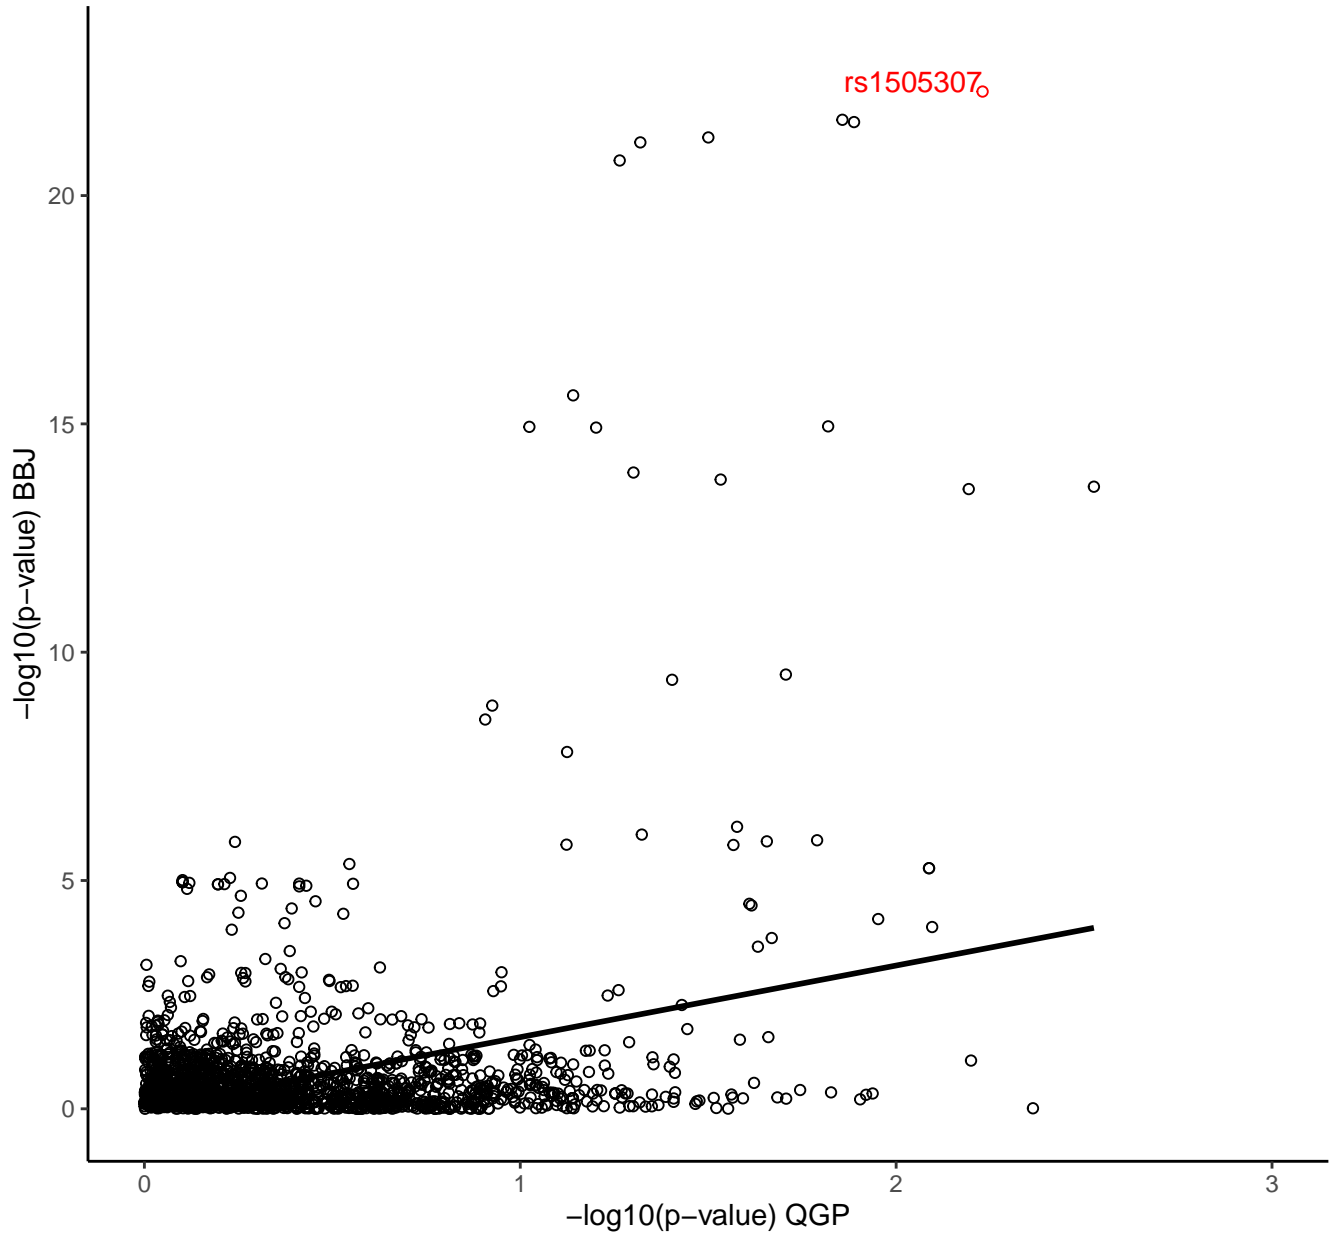



WBC rs6740847

nSNPs = 1962; H2: 0.407; H3: 0.0696; H4: 0.518

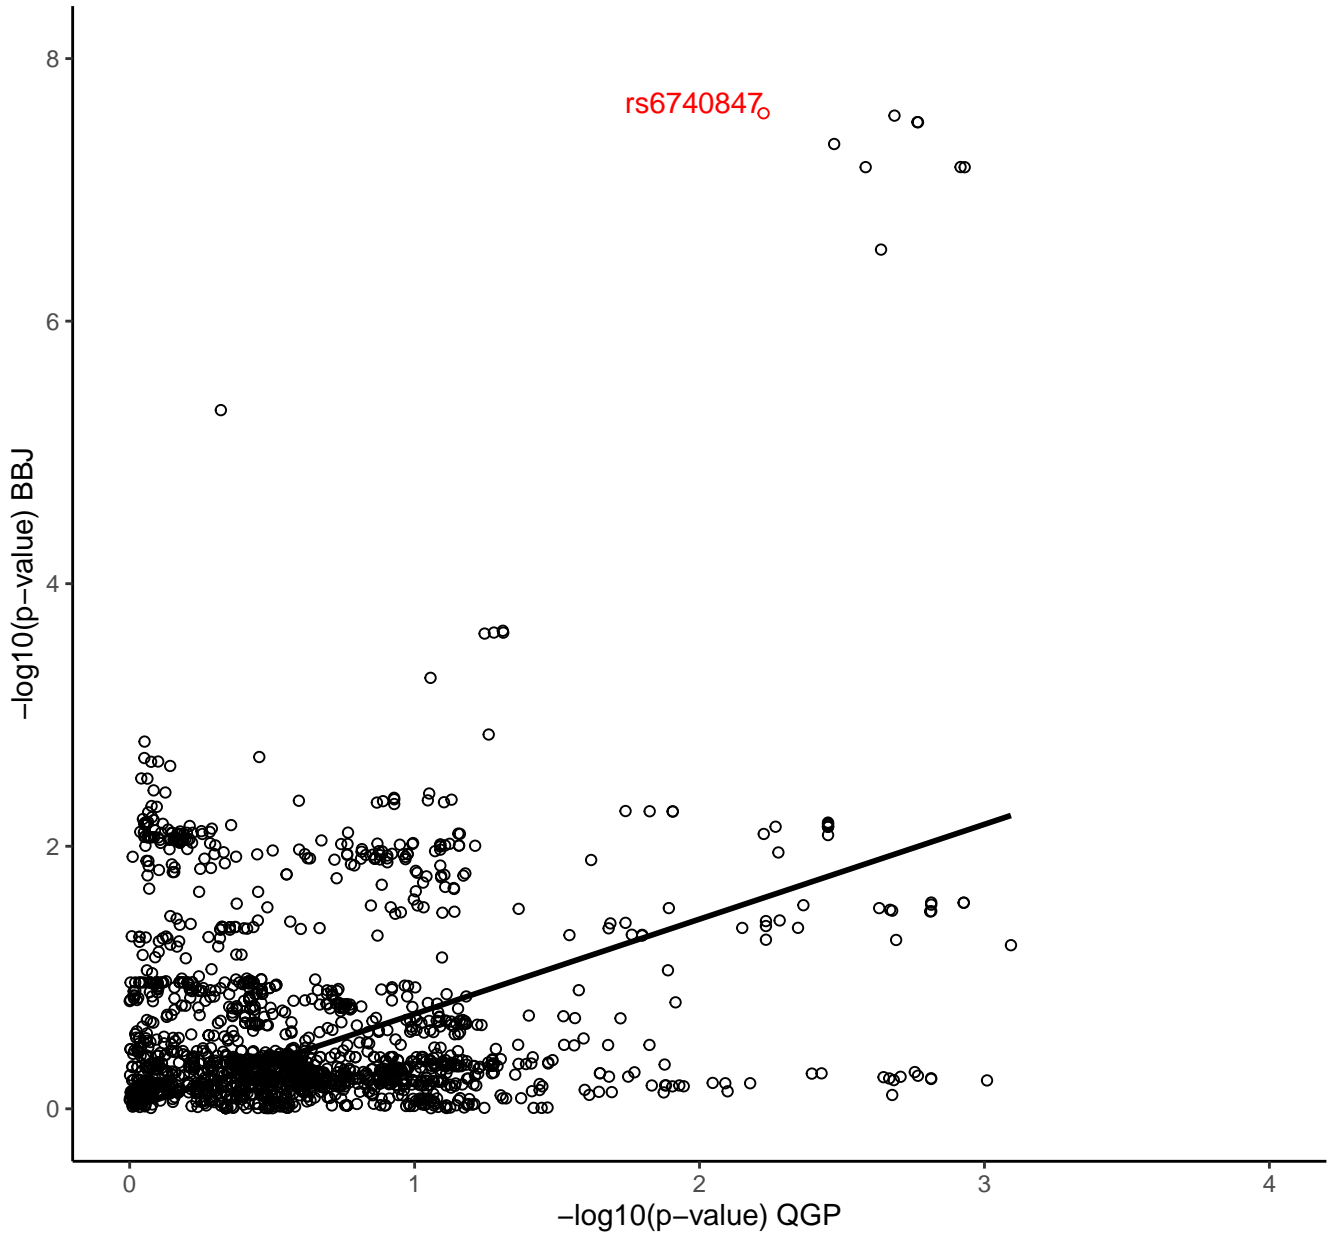

AST rs333947

nSNPs = 1386; H2: 0.614; H3: 0.0338; H4: 0.352

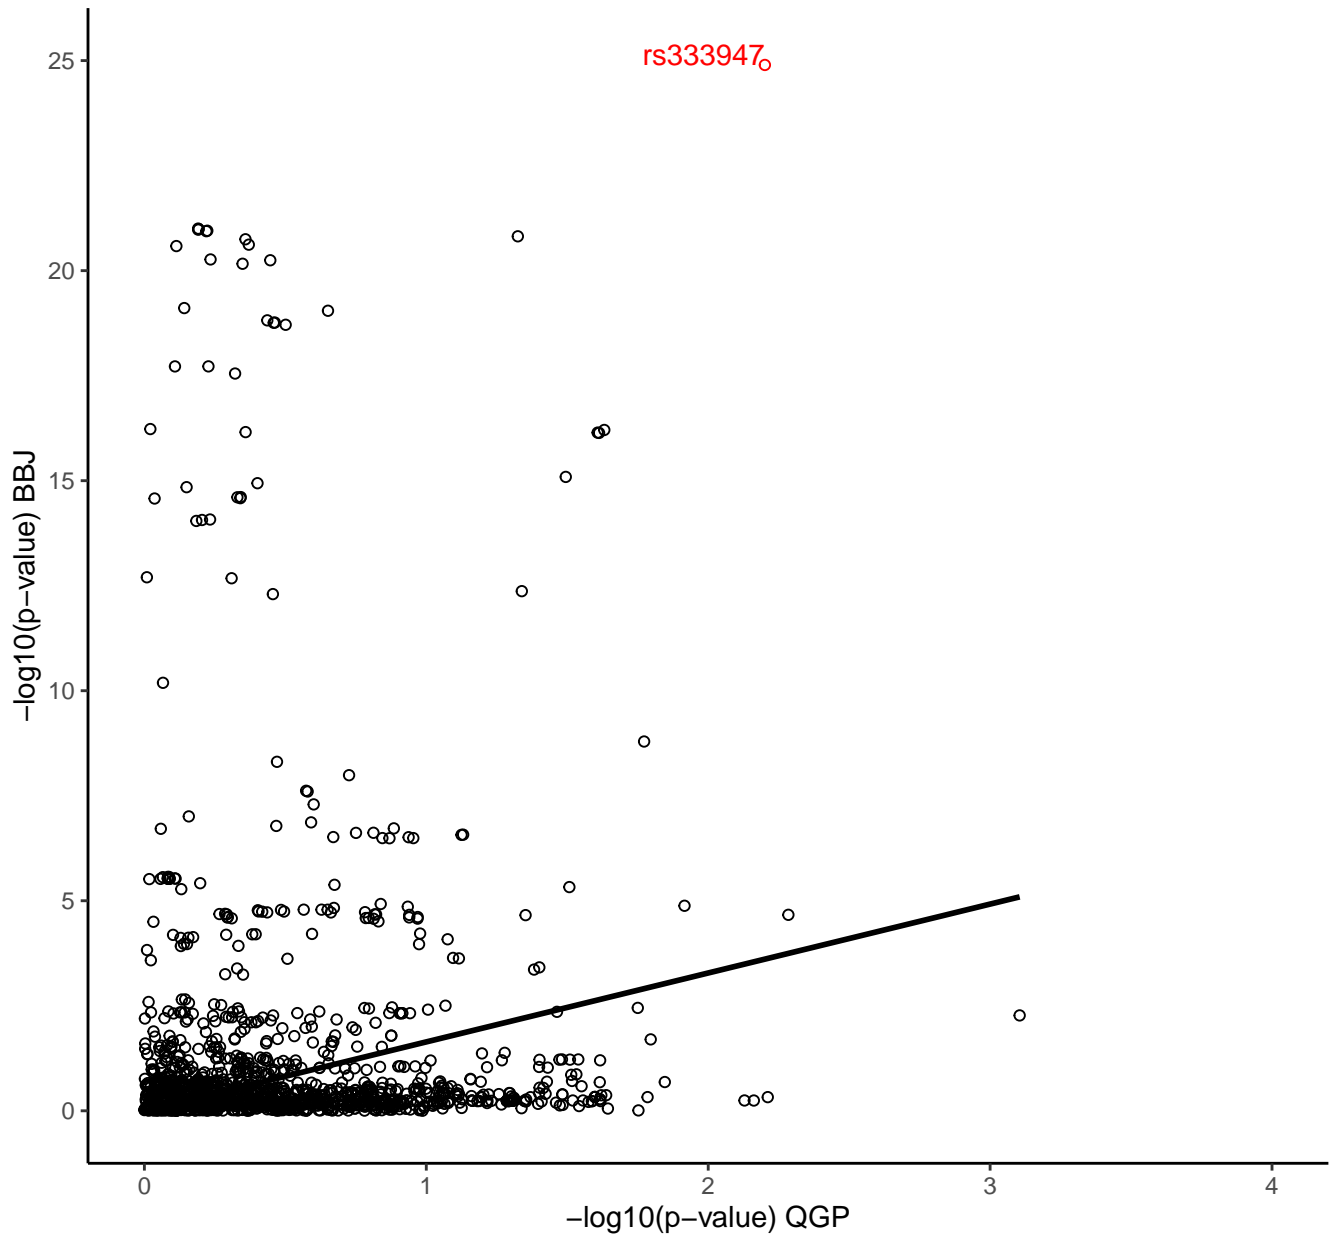

### HDL-C rs2144300

nSNPs = 1846; H2: 0.47; H3: 0.298; H4: 0.219

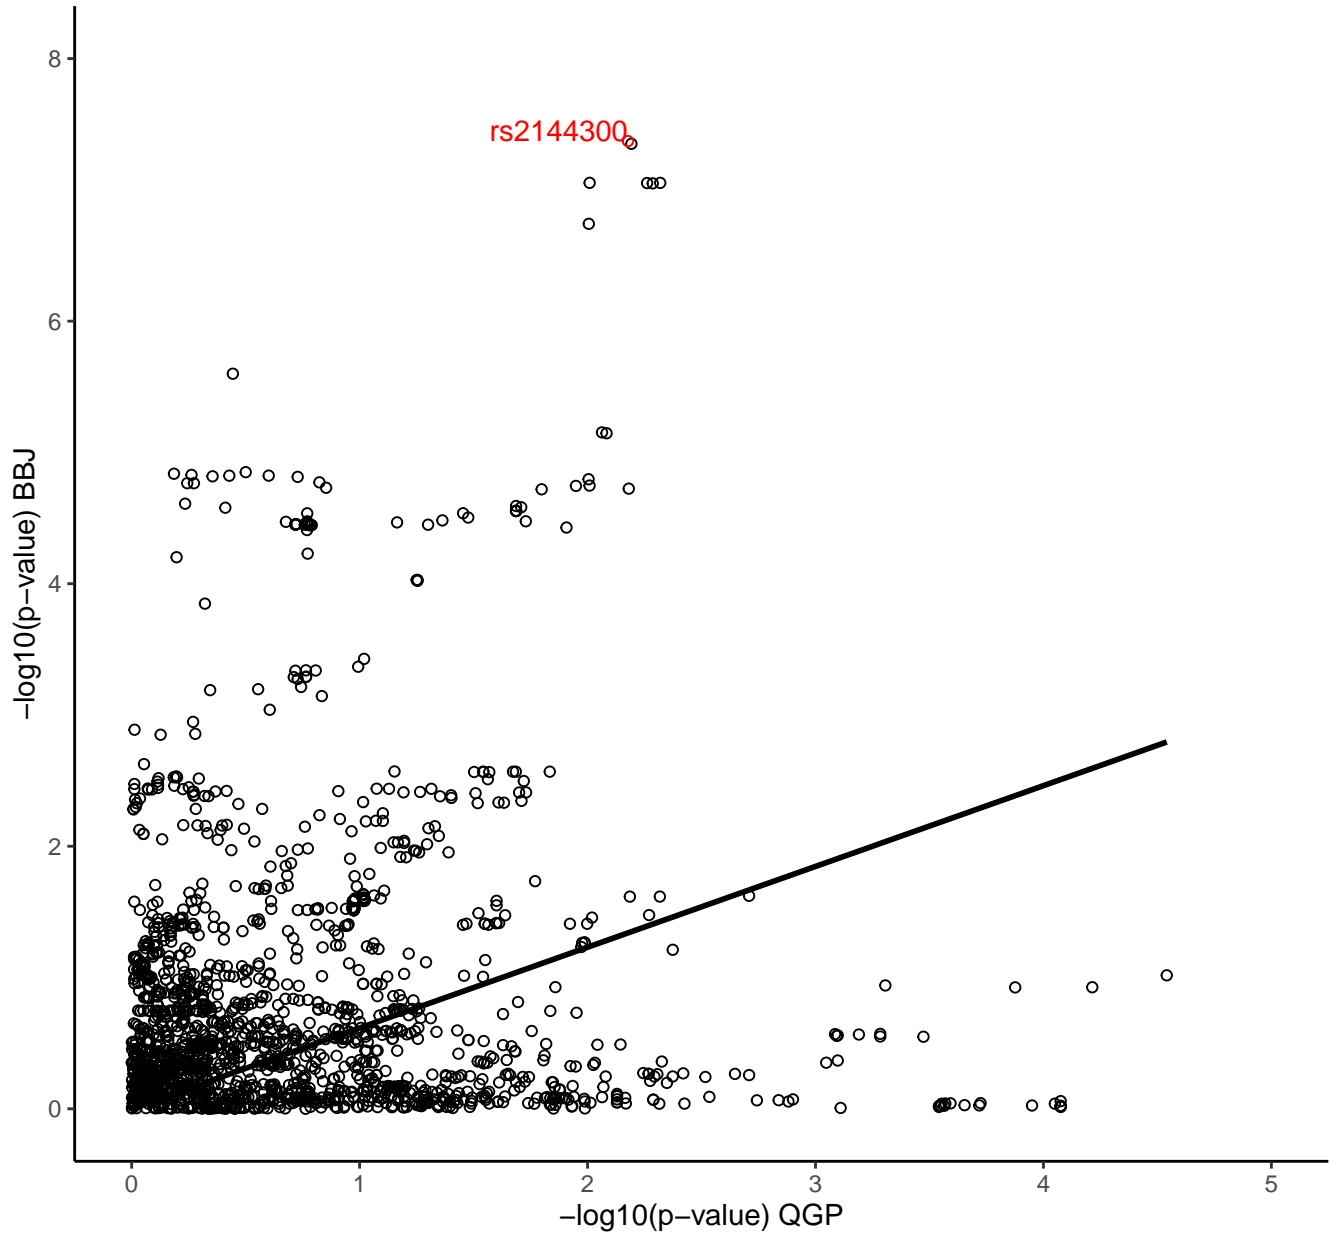

AST rs9389268

nSNPs = 1313; H2: 0.616; H3: 0.0853; H4: 0.298

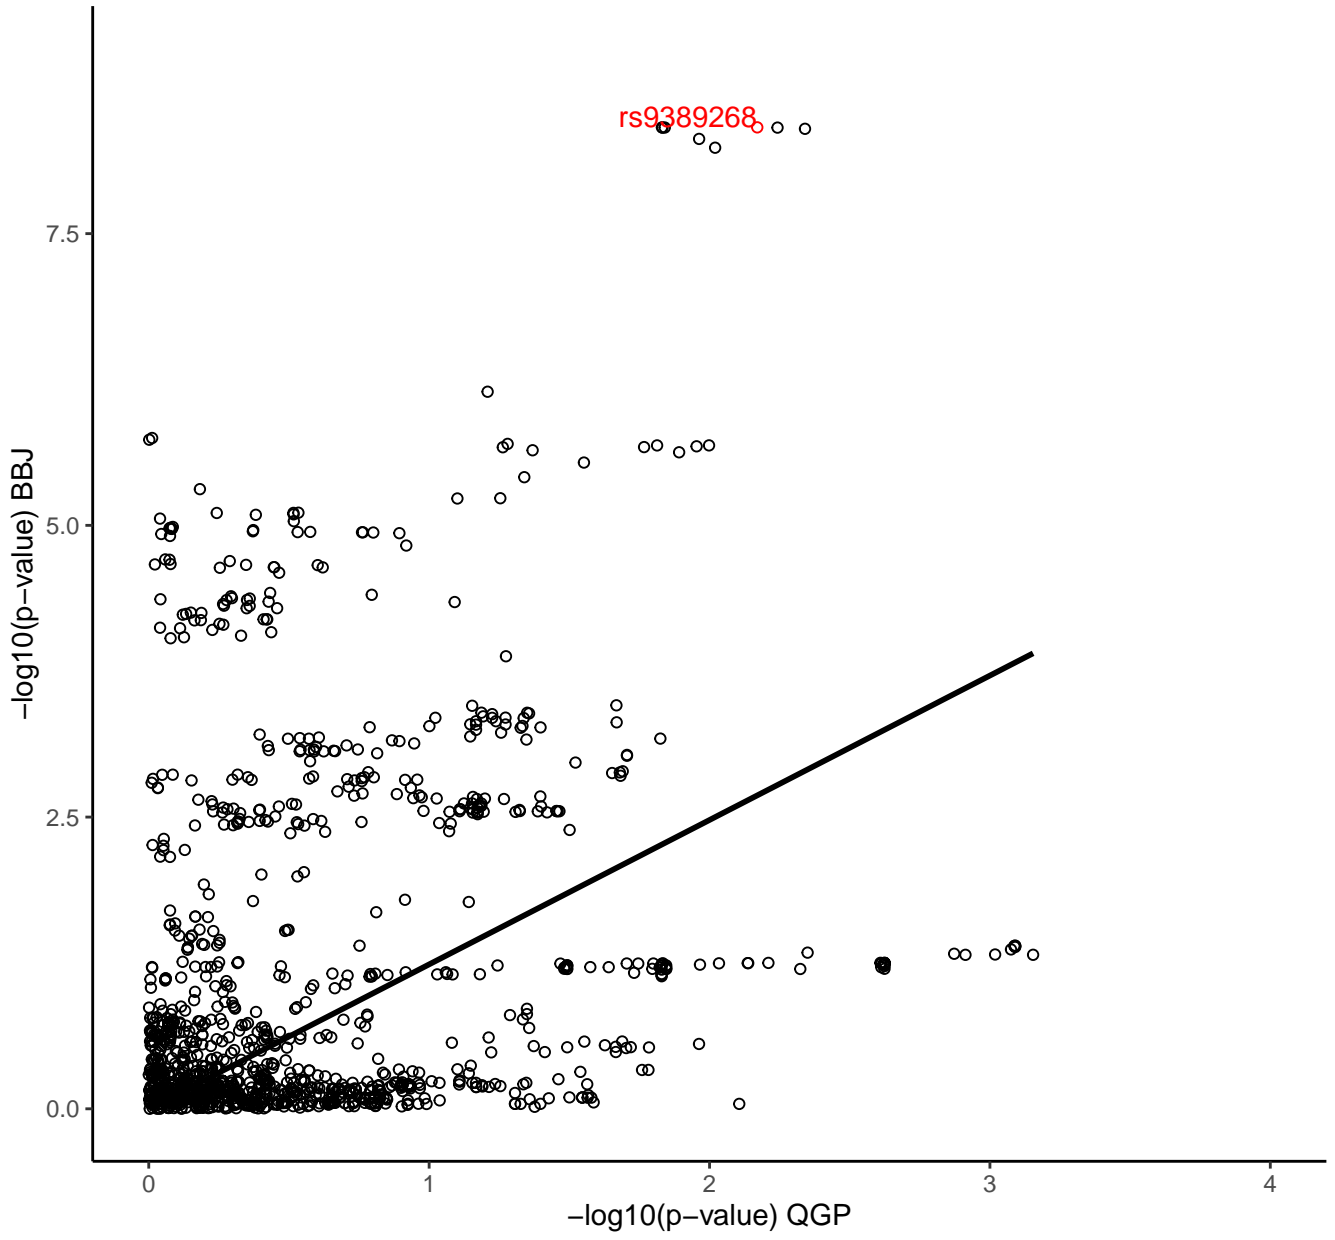

TBil rs1711171

nSNPs = 592; H2: 0.429; H3: 0.067; H4: 0.504

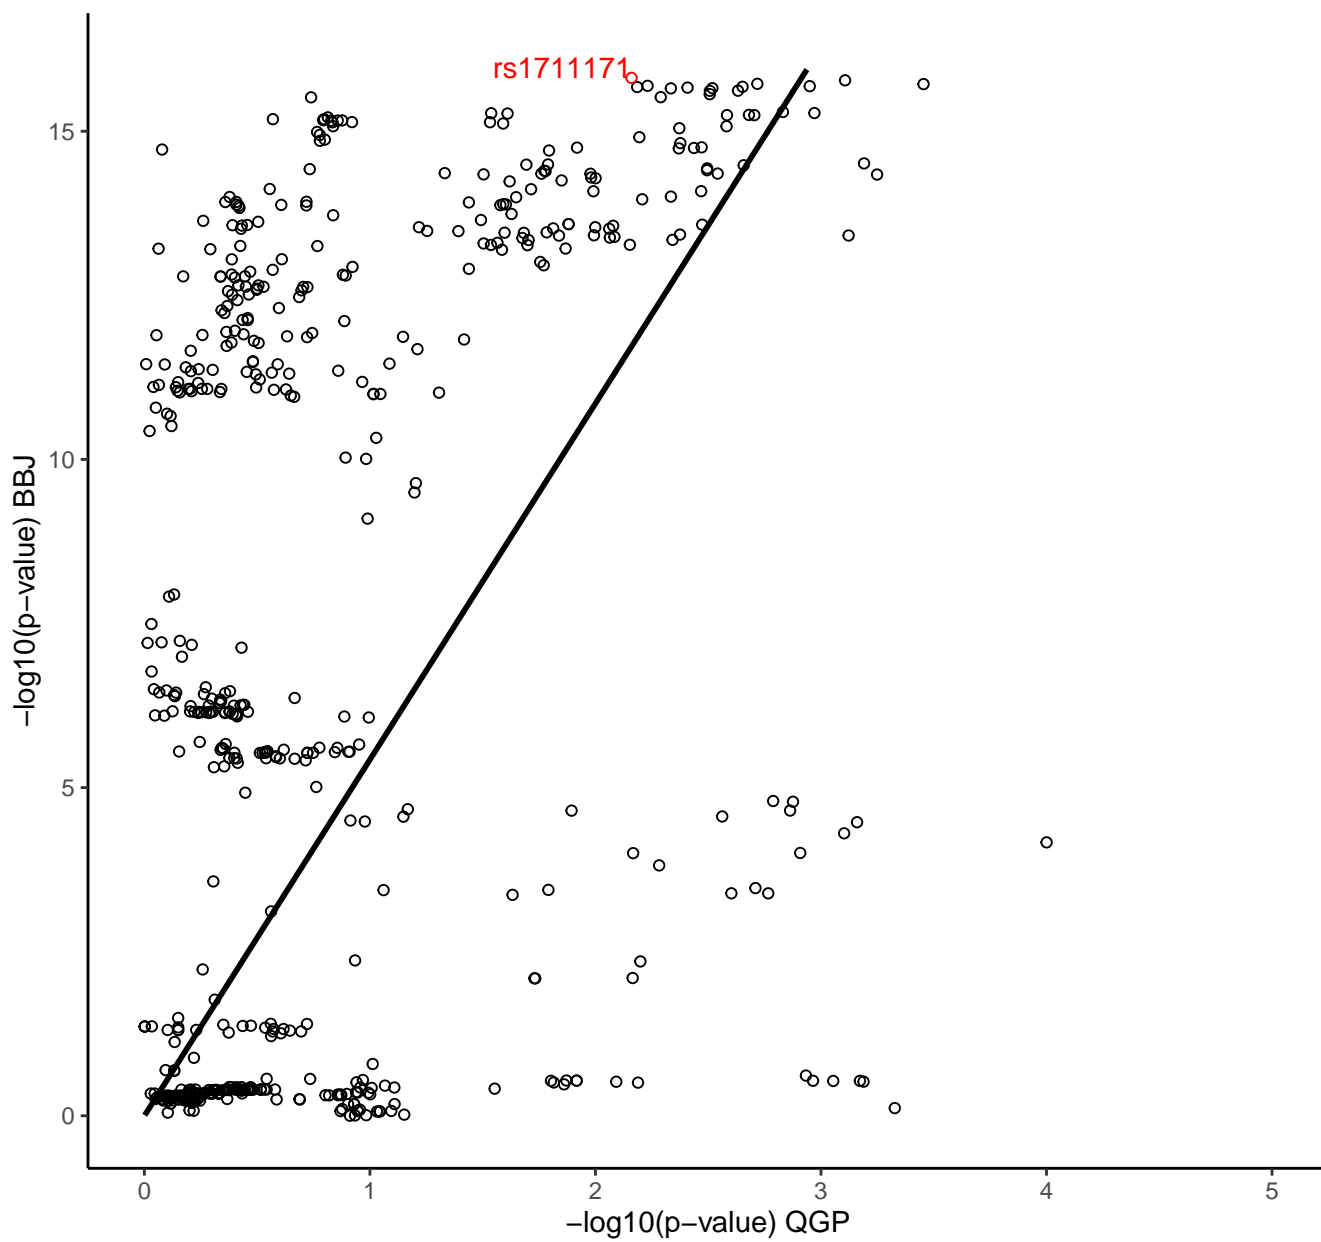

Plt rs11569142

nSNPs = 2101; H2: 0.49; H3: 0.116; H4: 0.394

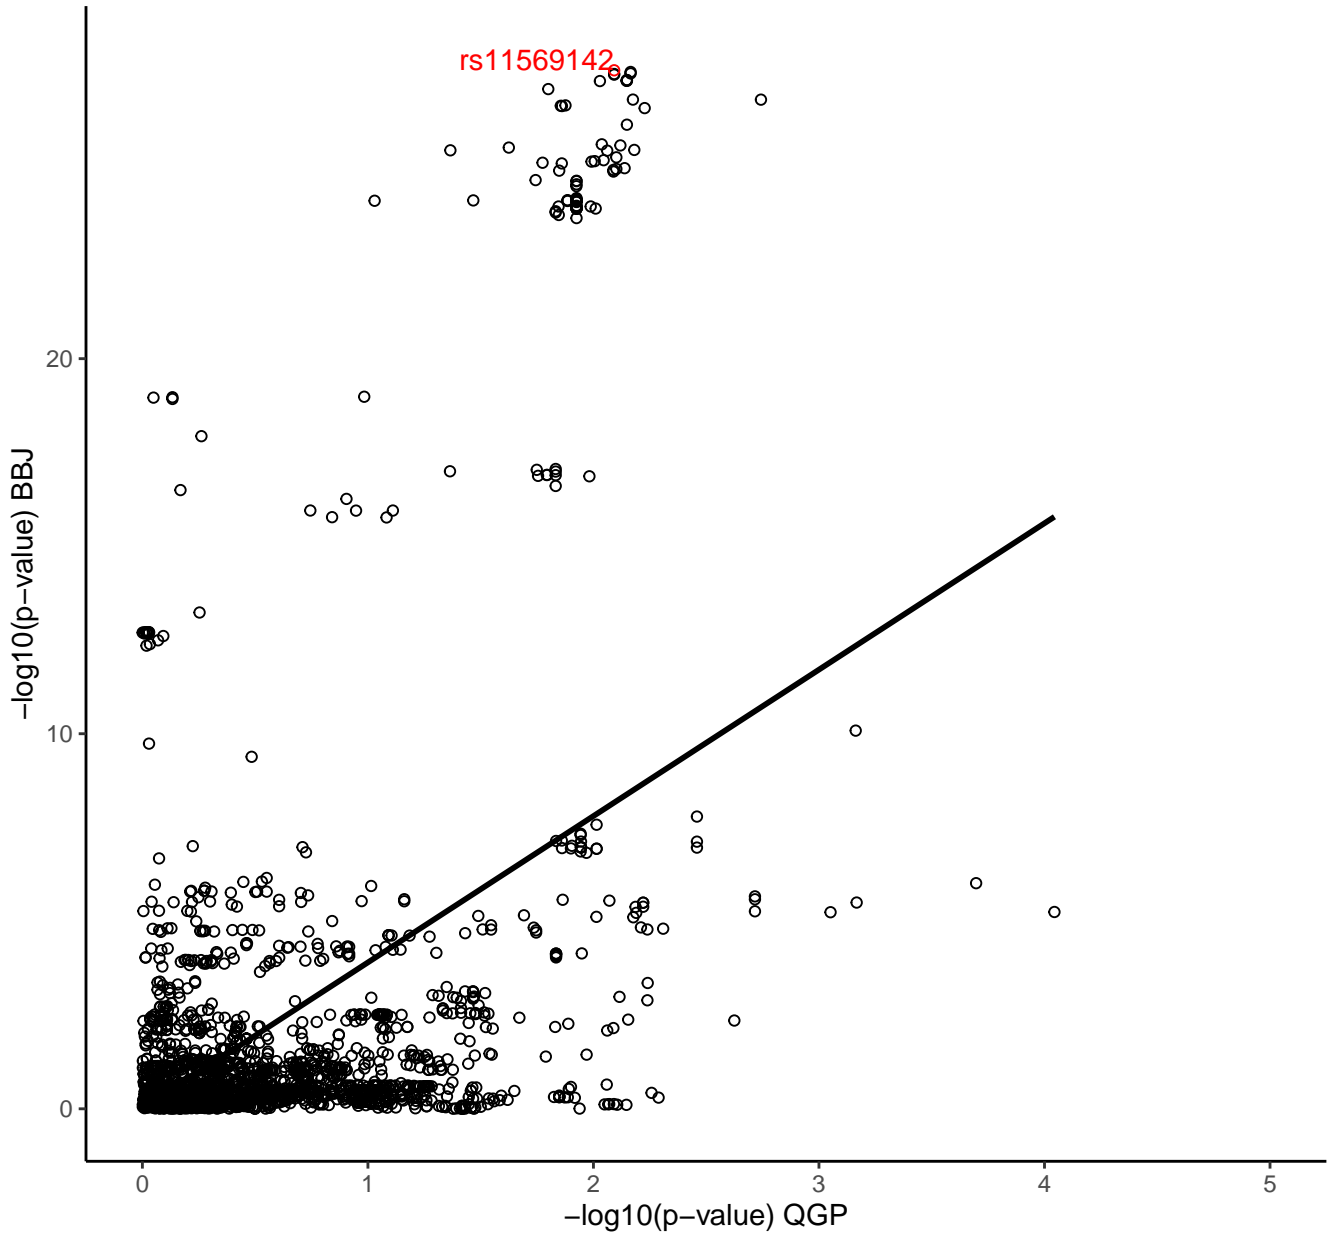

sCr rs316020

nSNPs = 1702; H2: 0.554; H3: 0.0398; H4: 0.406

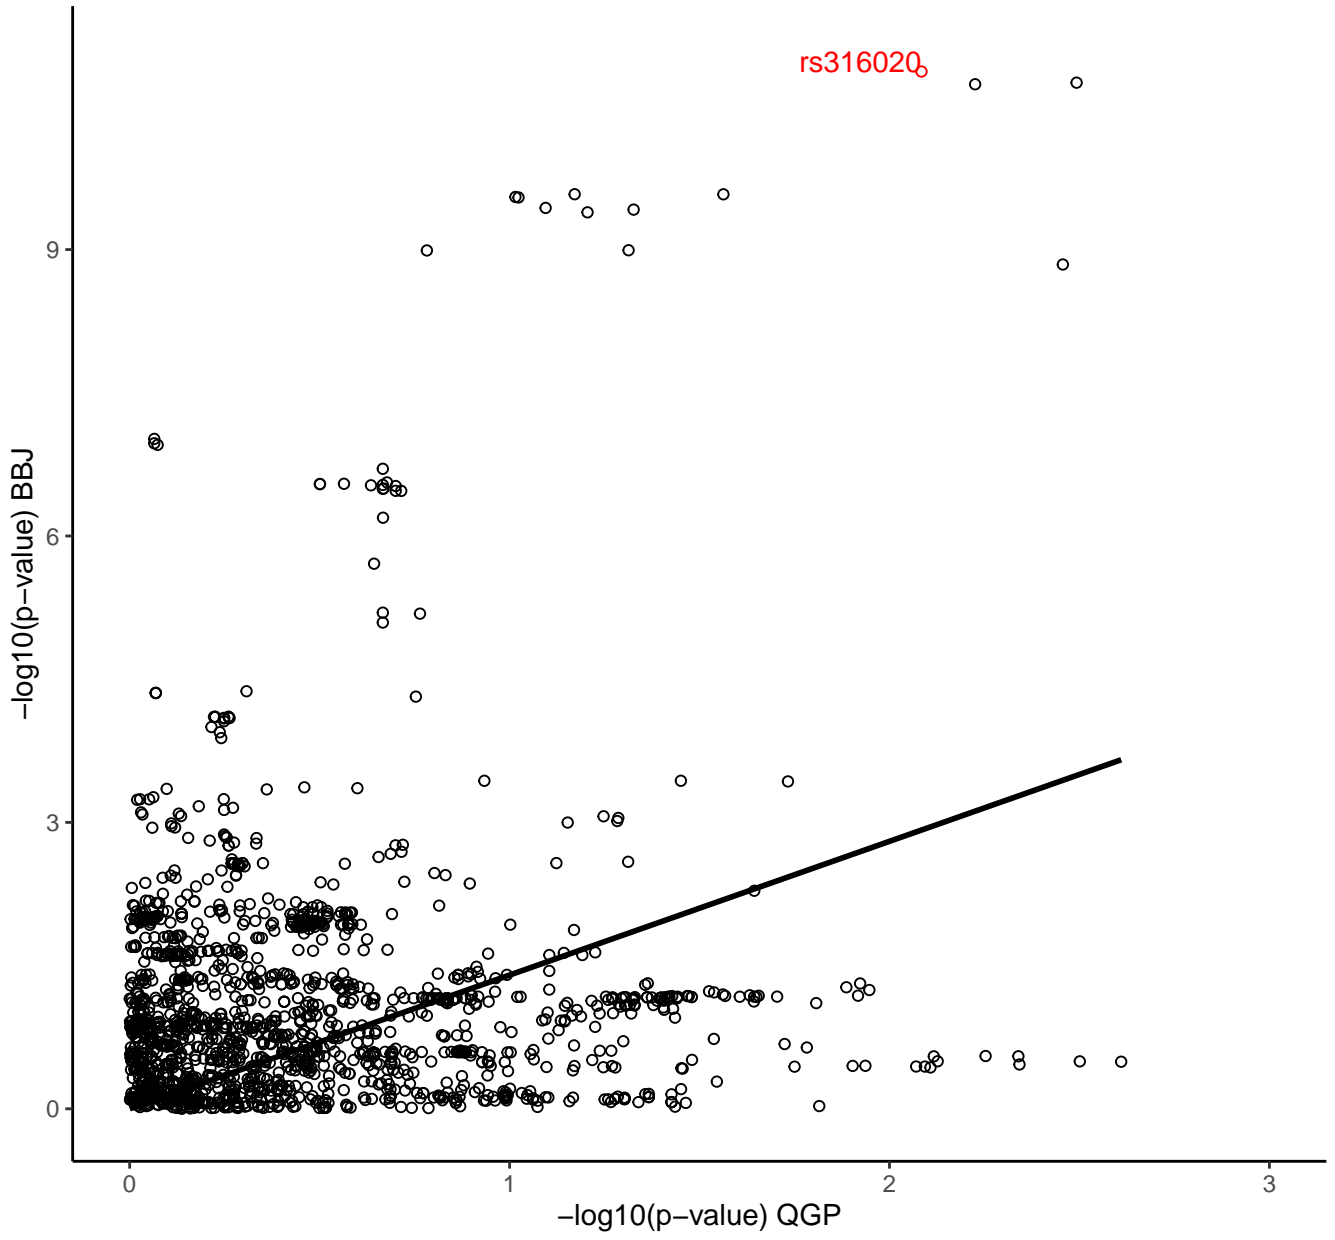

CI rs459044

nSNPs = 1708; H2: 0.64; H3: 0.138; H4: 0.214

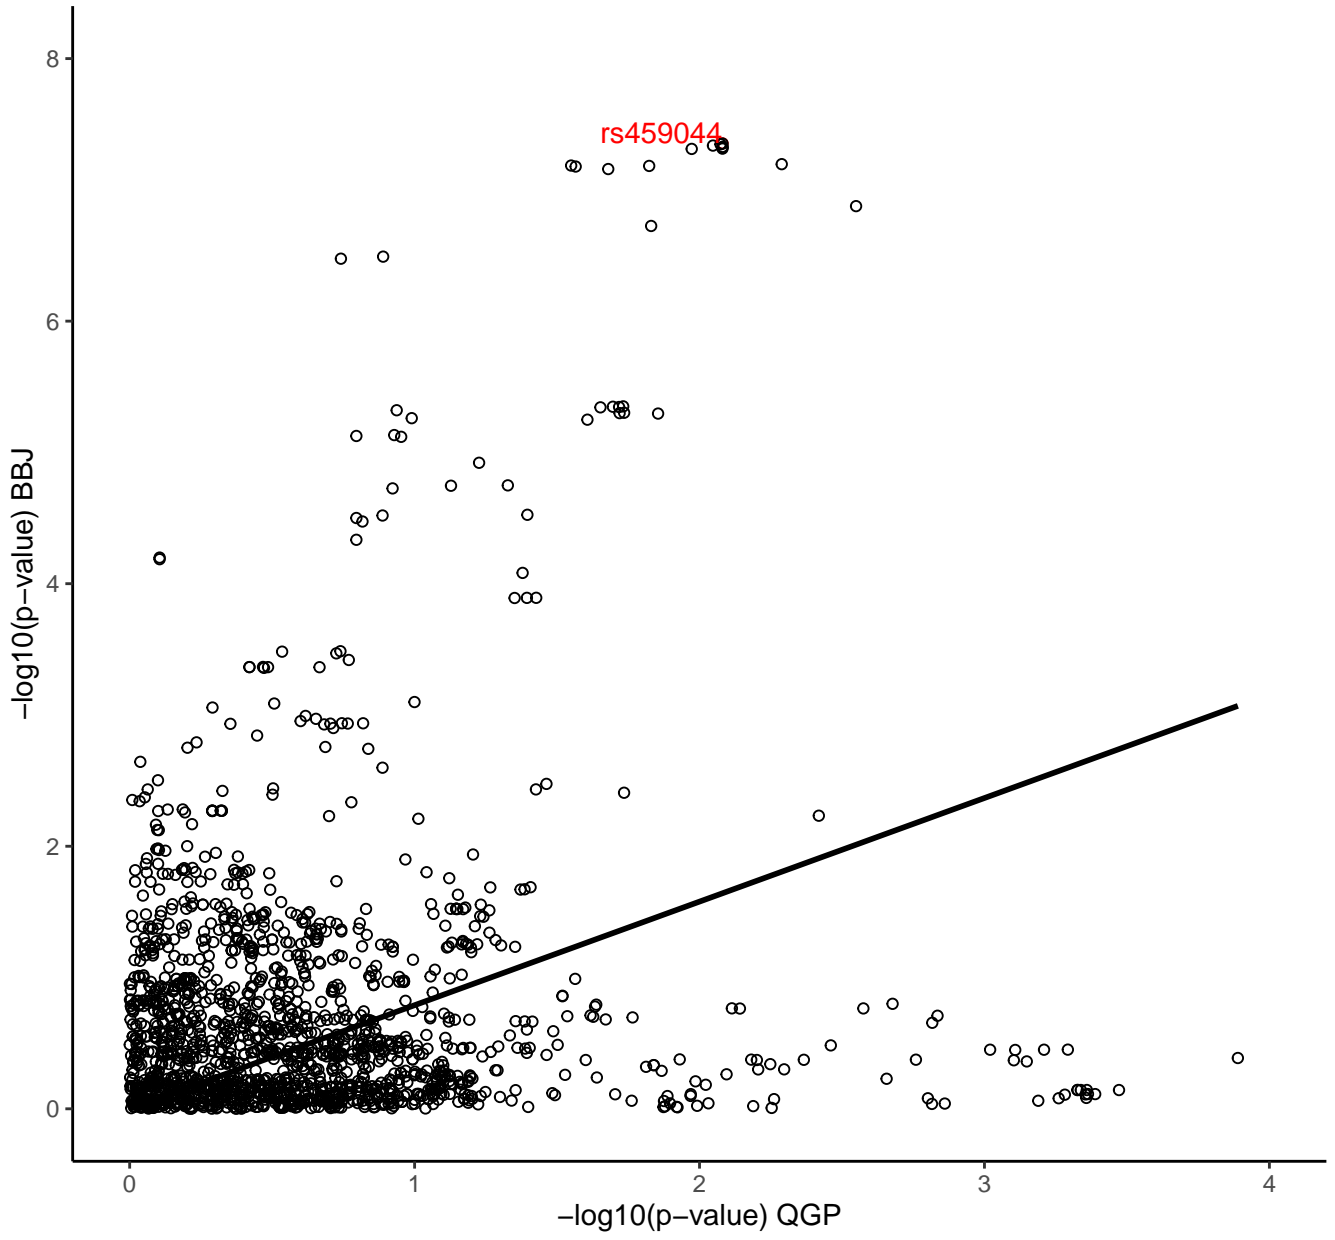



Hb rs366684

nSNPs = 1788; H2: 0.408; H3: 0.108; H4: 0.484

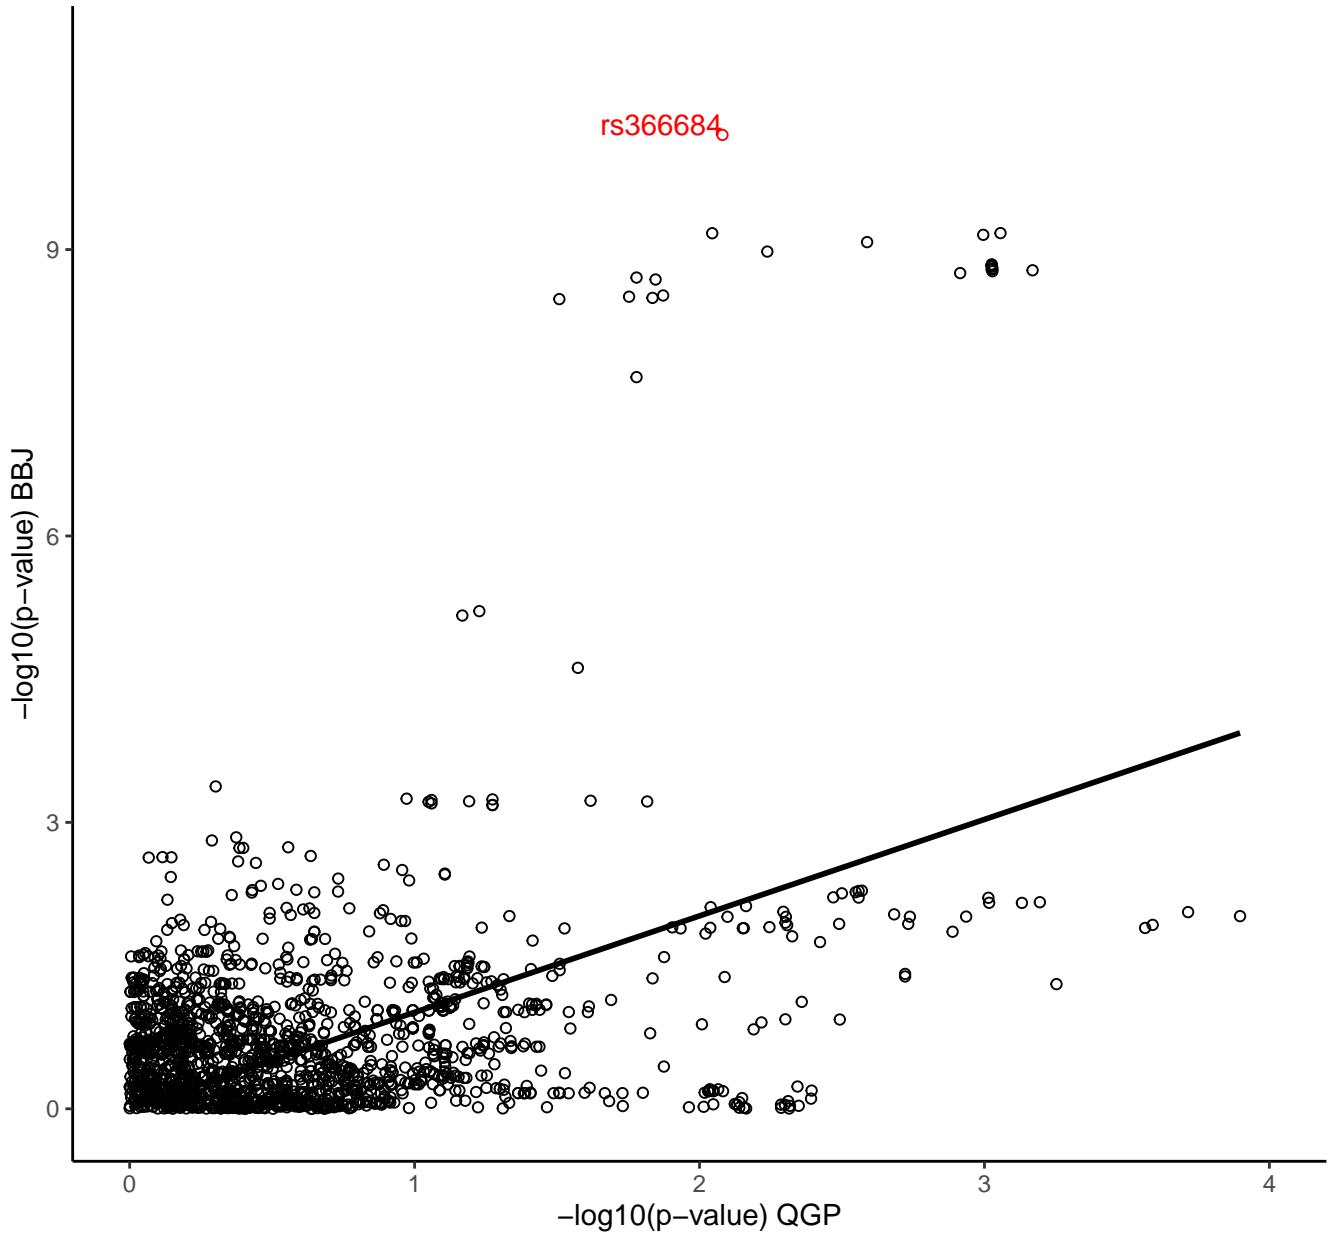

LDL-C rs6882076

nSNPs = 1688; H2: 0.63; H3: 0.121; H4: 0.248

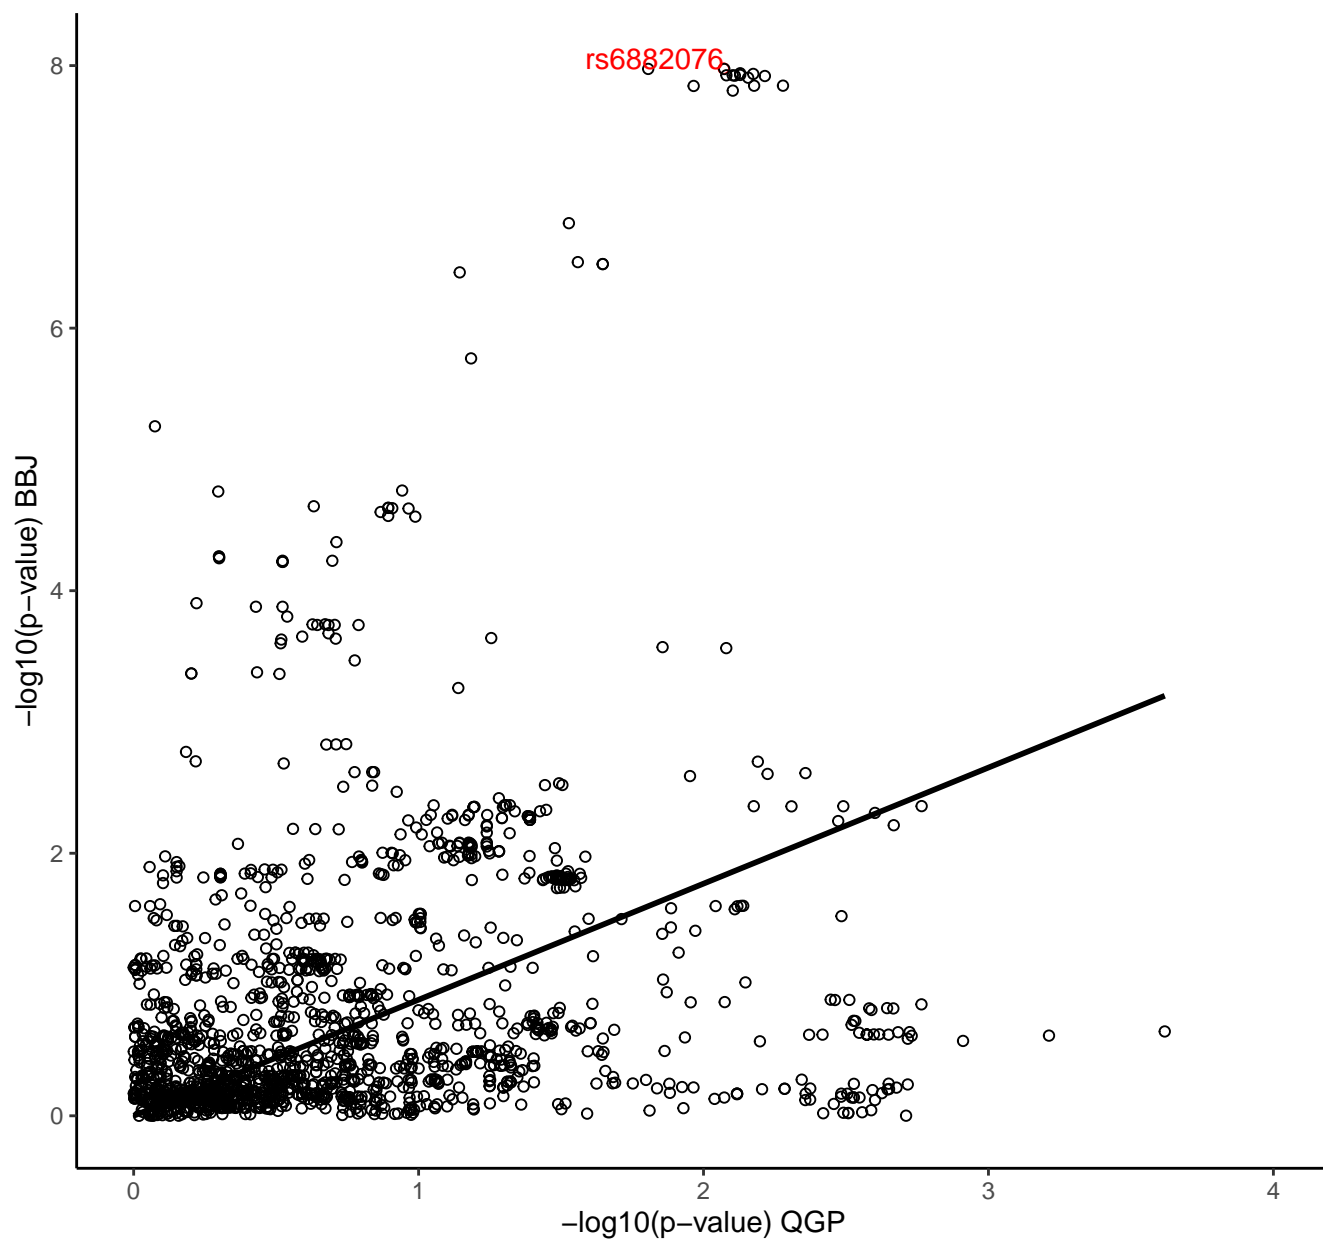

ALT rs62269283

nSNPs = 1840; H2: 0.442; H3: 0.0678; H4: 0.49

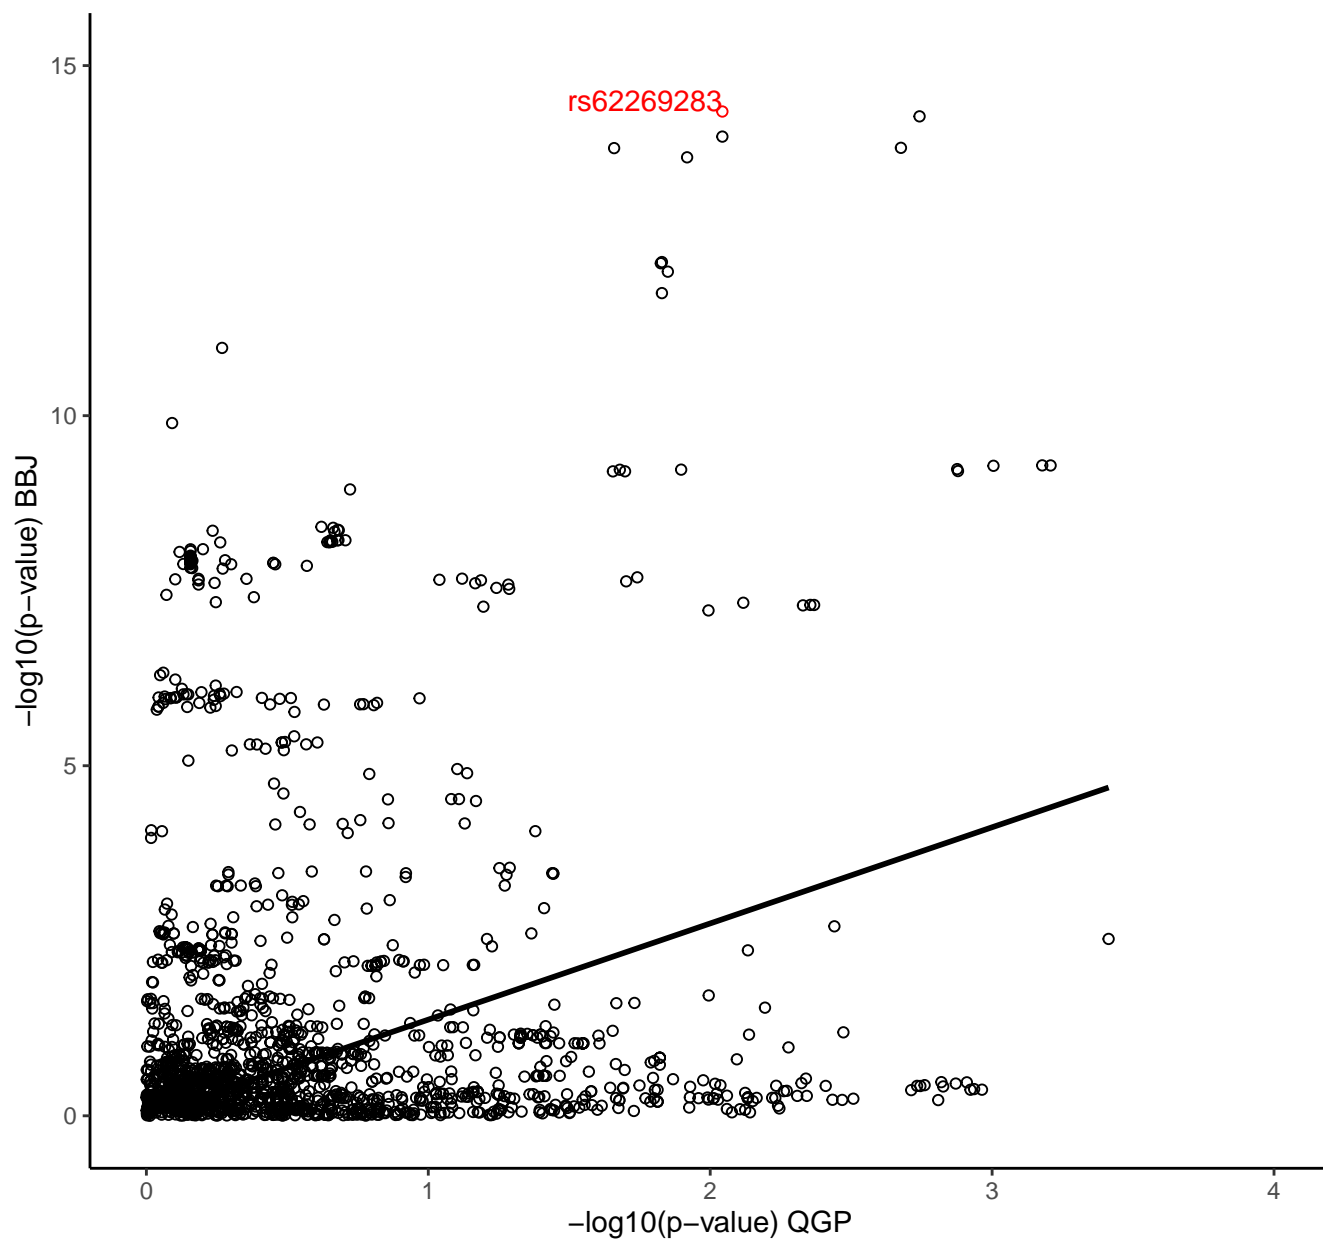

CK rs2693560

nSNPs = 1842; H2: 0.712; H3: 0.0781; H4: 0.21

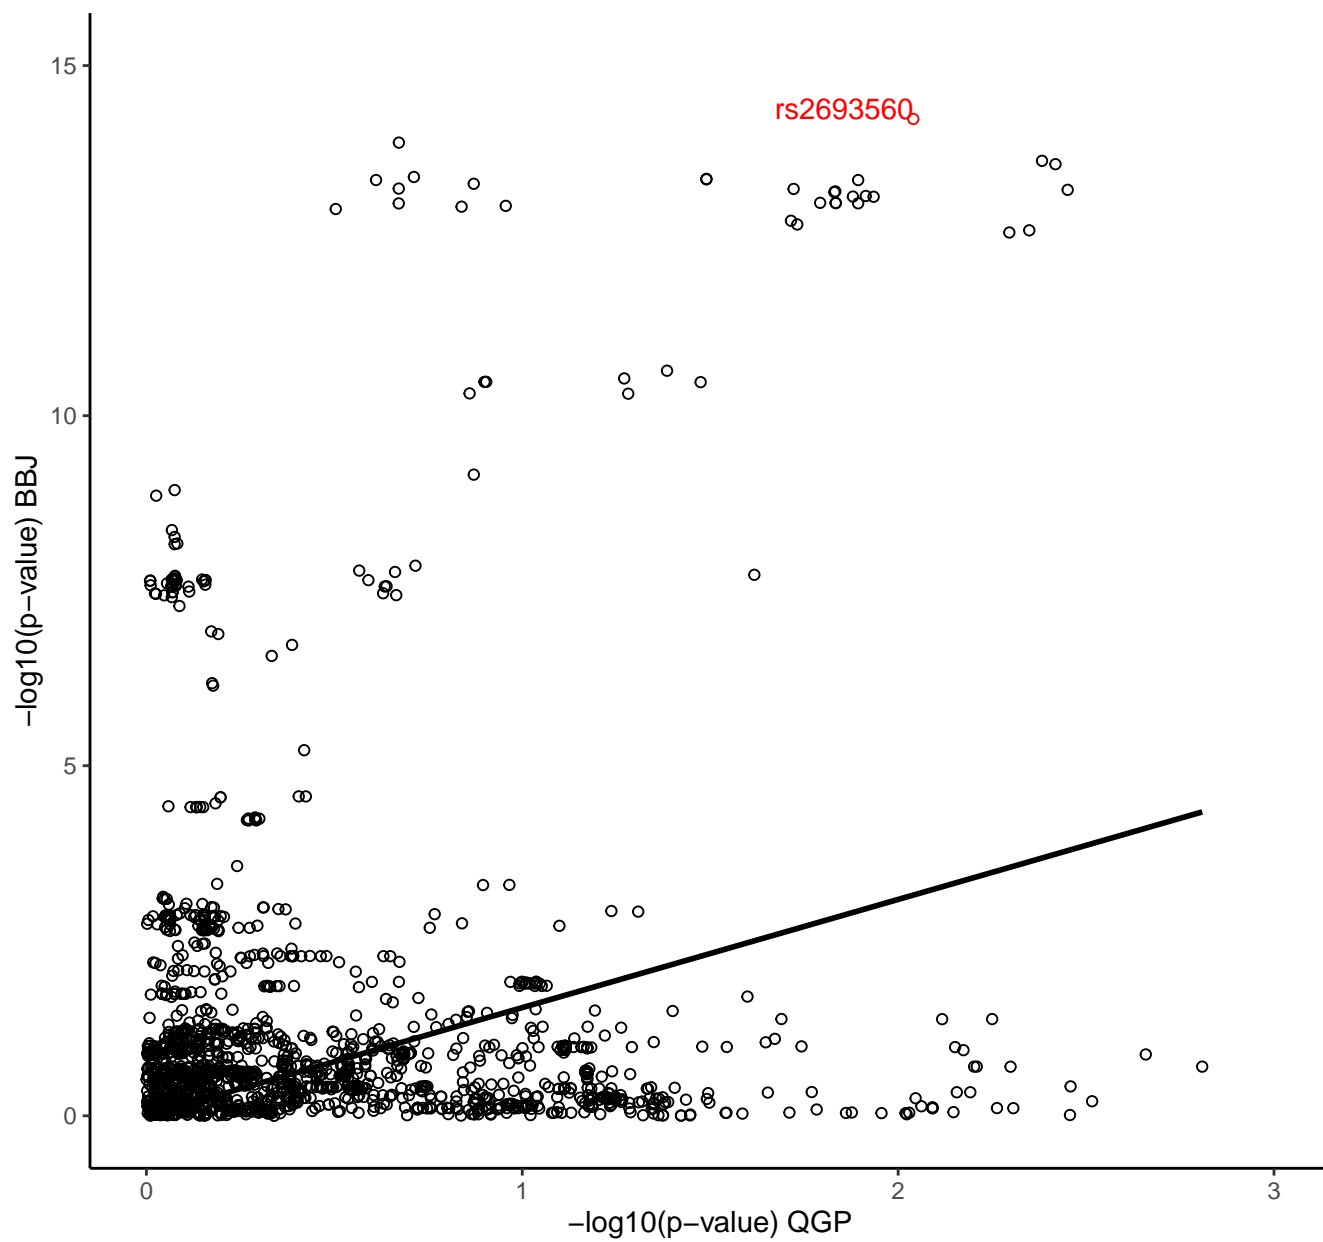

TC rs2737252

nSNPs = 1140; H2: 0.656; H3: 0.0259; H4: 0.318

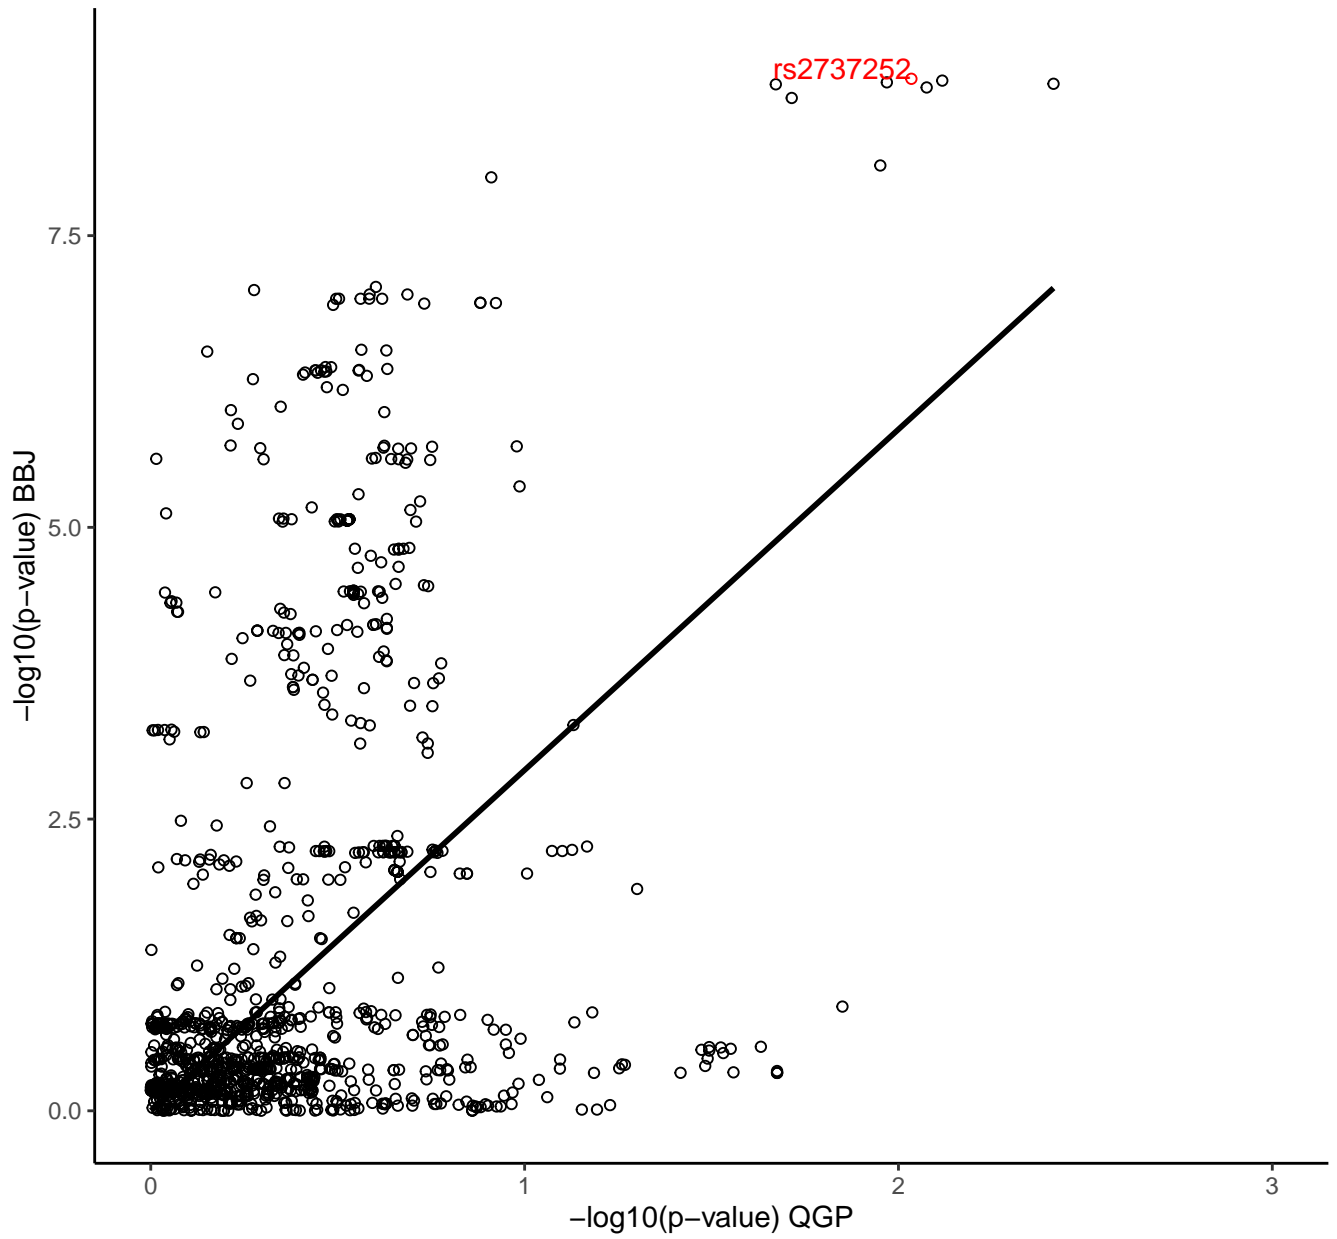

Plt rs10757287

nSNPs = 1868; H2: 0.626; H3: 0.0396; H4: 0.334

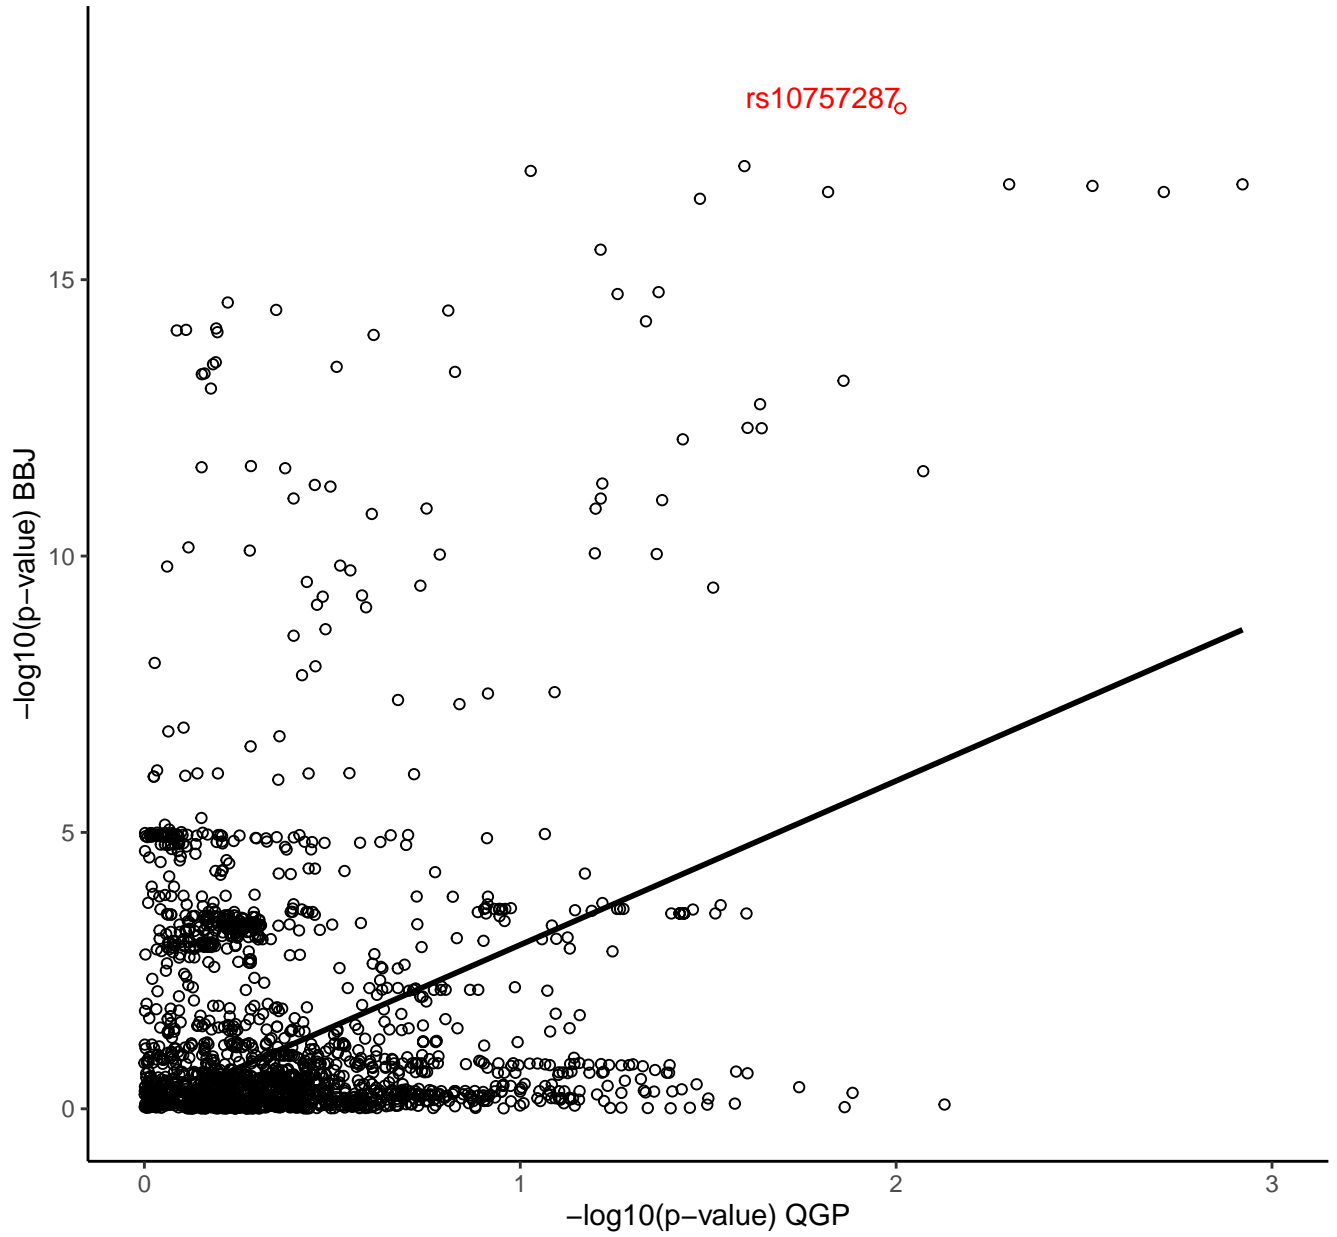

sCr rs9895661

nSNPs = 1039; H2: 0.694; H3: 0.068; H4: 0.238

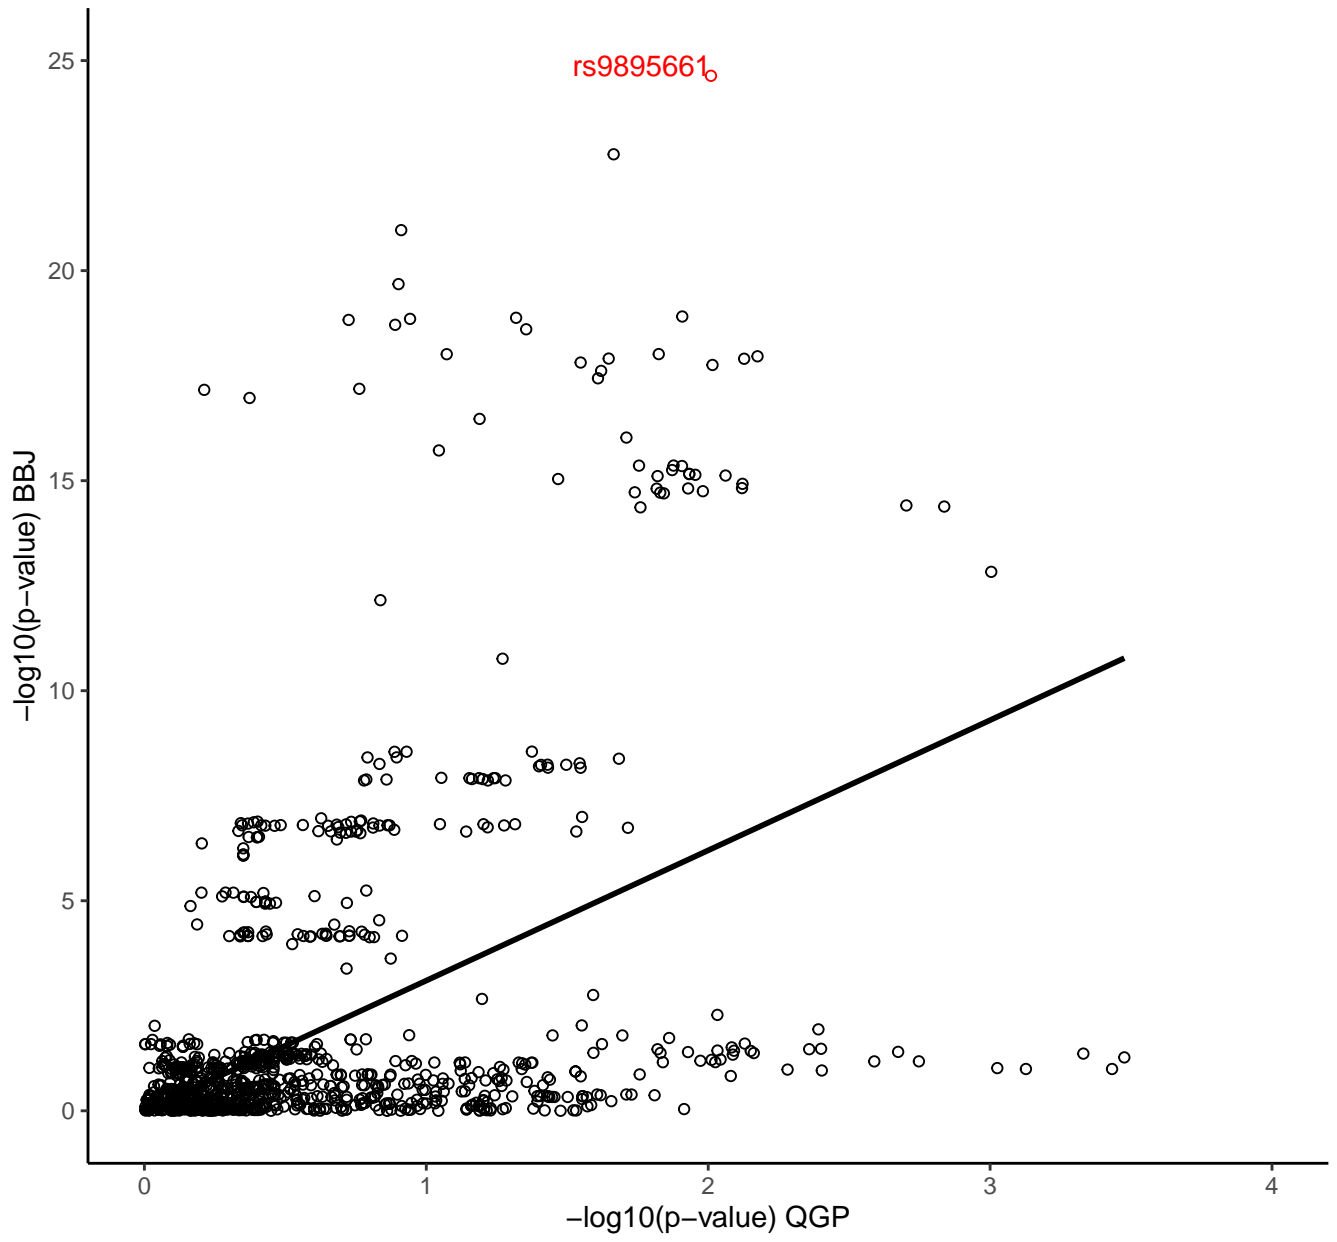

Plt rs9399137

nSNPs = 1312; H2: 0.41; H3: 0.354; H4: 0.236

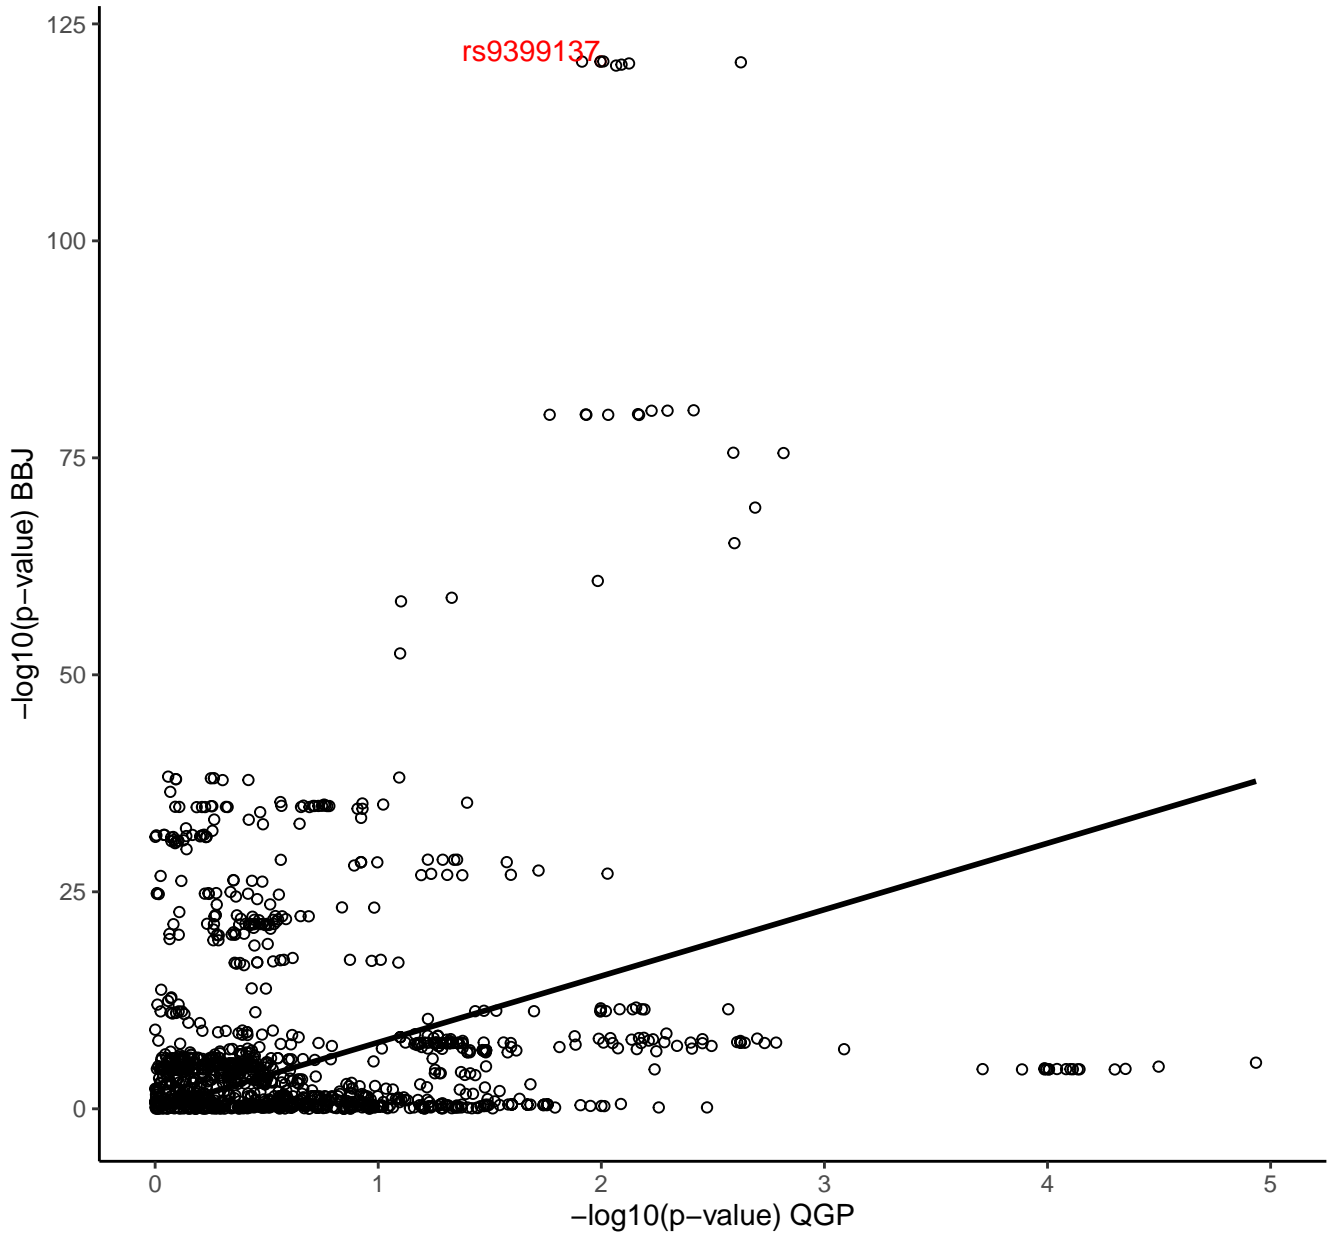



Plt rs34038797

nSNPs = 1923; H2: 0.82; H3: 0.0782; H4: 0.102

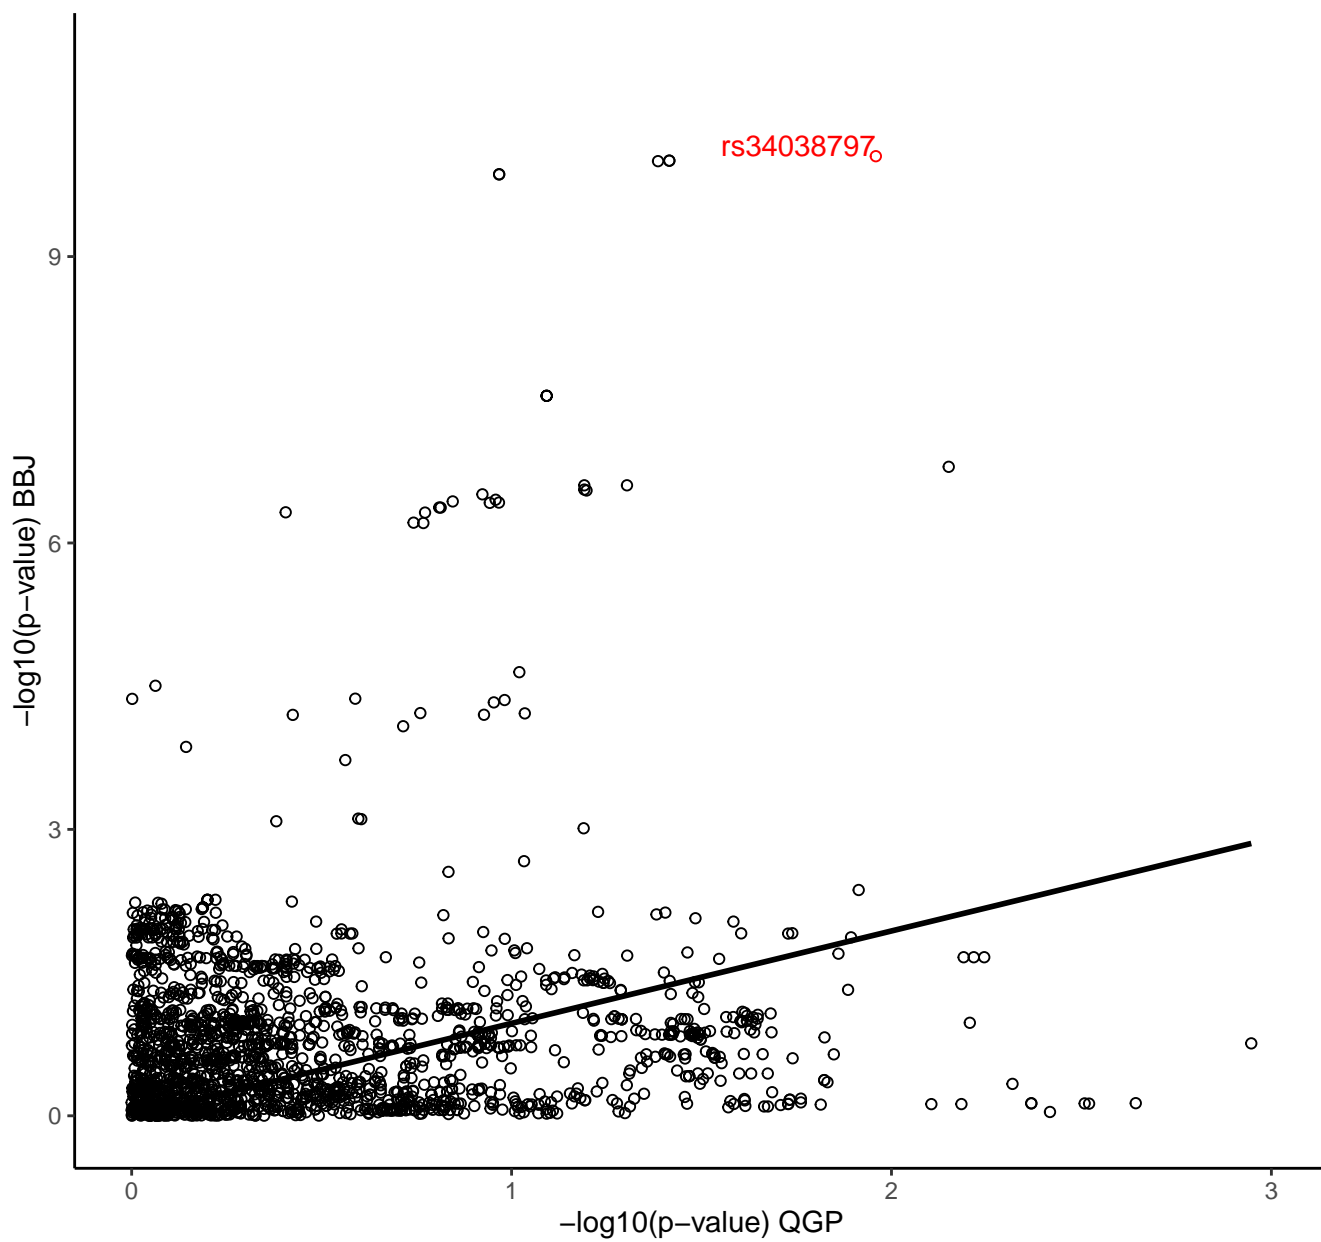

CK rs333947

nSNPs = 1386; H2: 0.701; H3: 0.0423; H4: 0.256

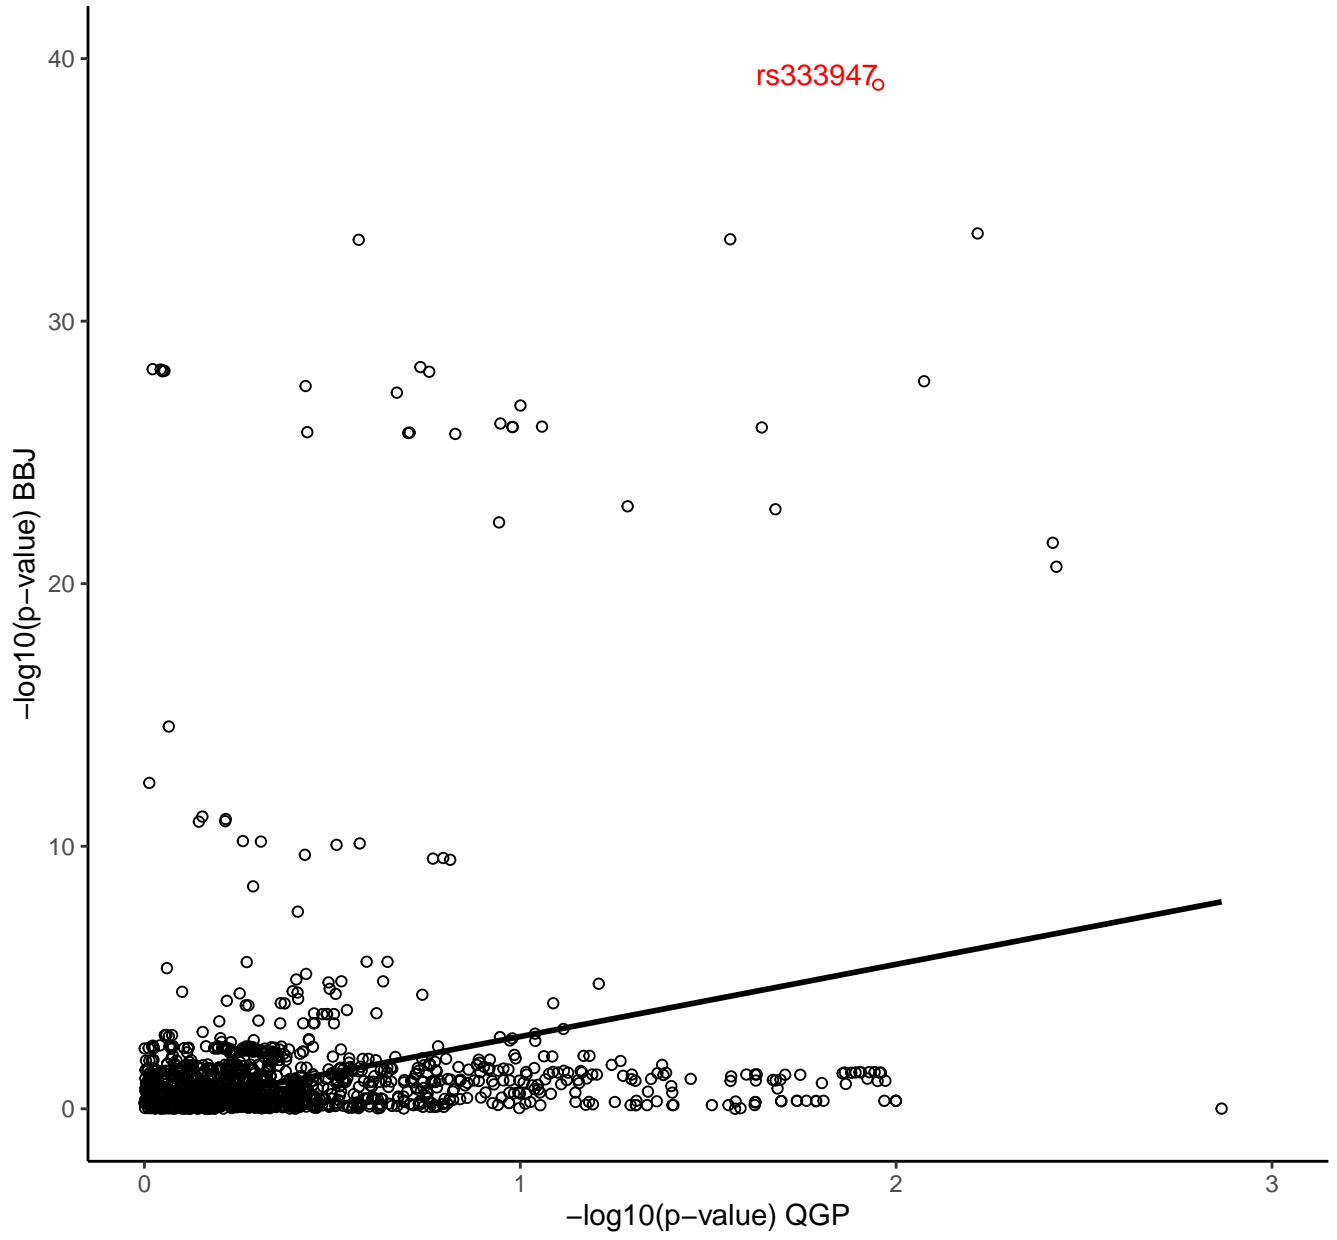

CI rs1169288

nSNPs = 1862; H2: 0.736; H3: 0.0592; H4: 0.2

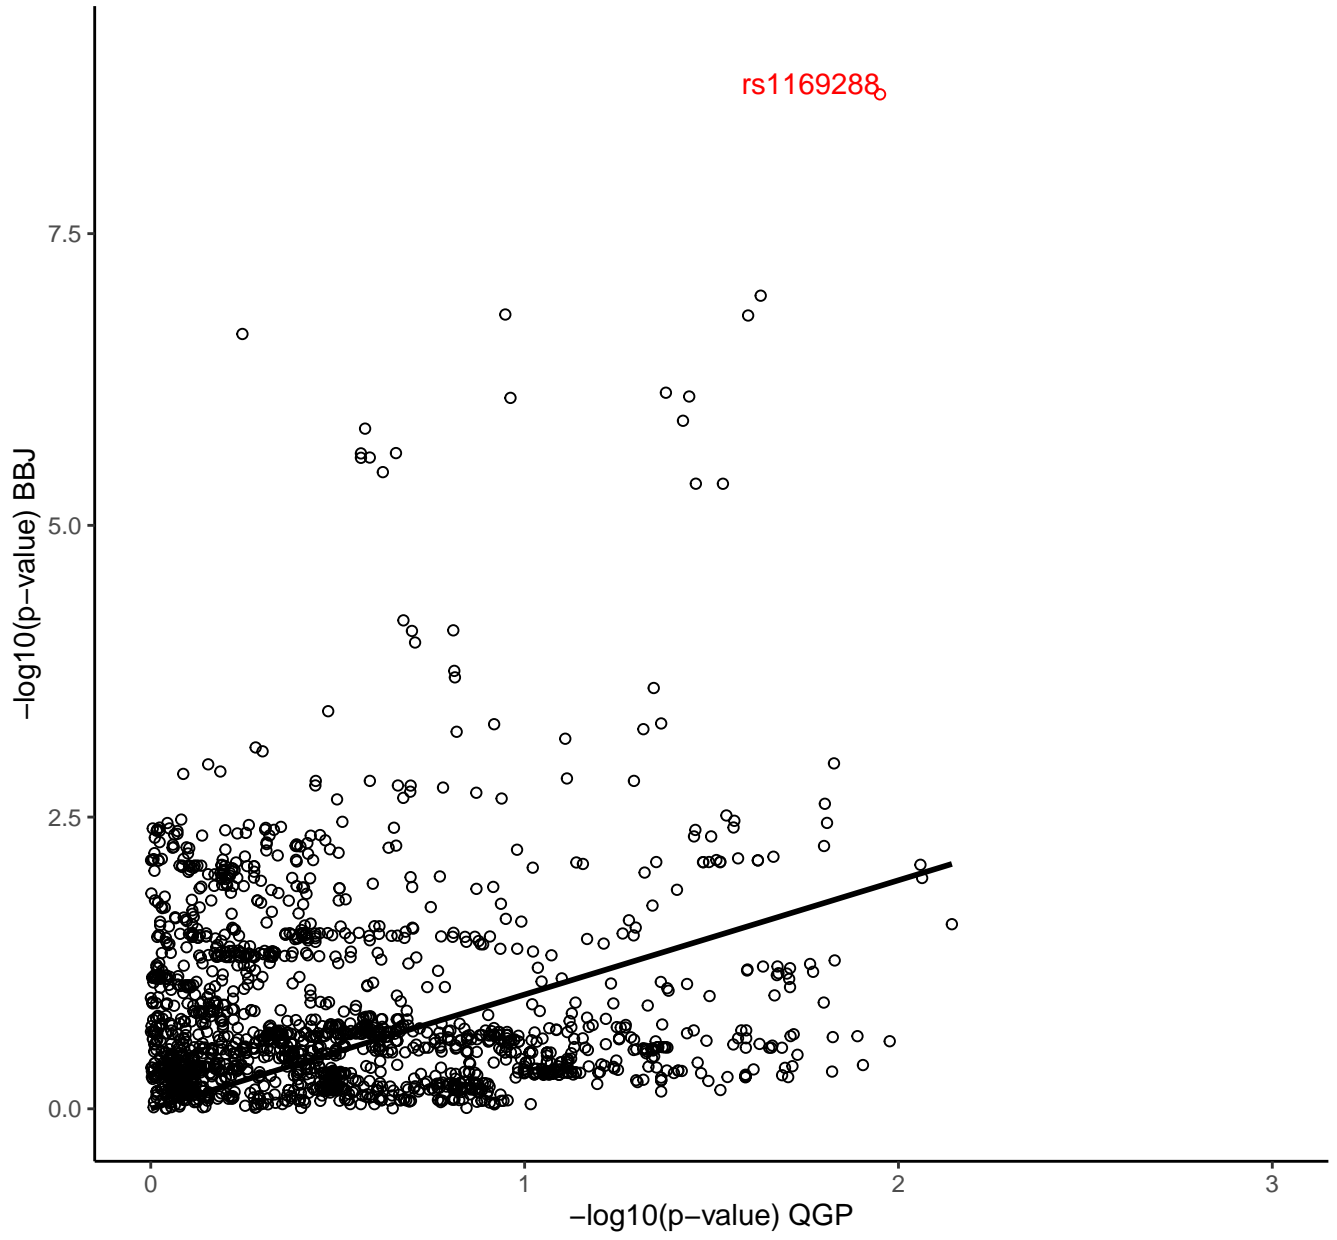

MCH rs737092

nSNPs = 2114; H2: 0.7; H3: 0.111; H4: 0.189

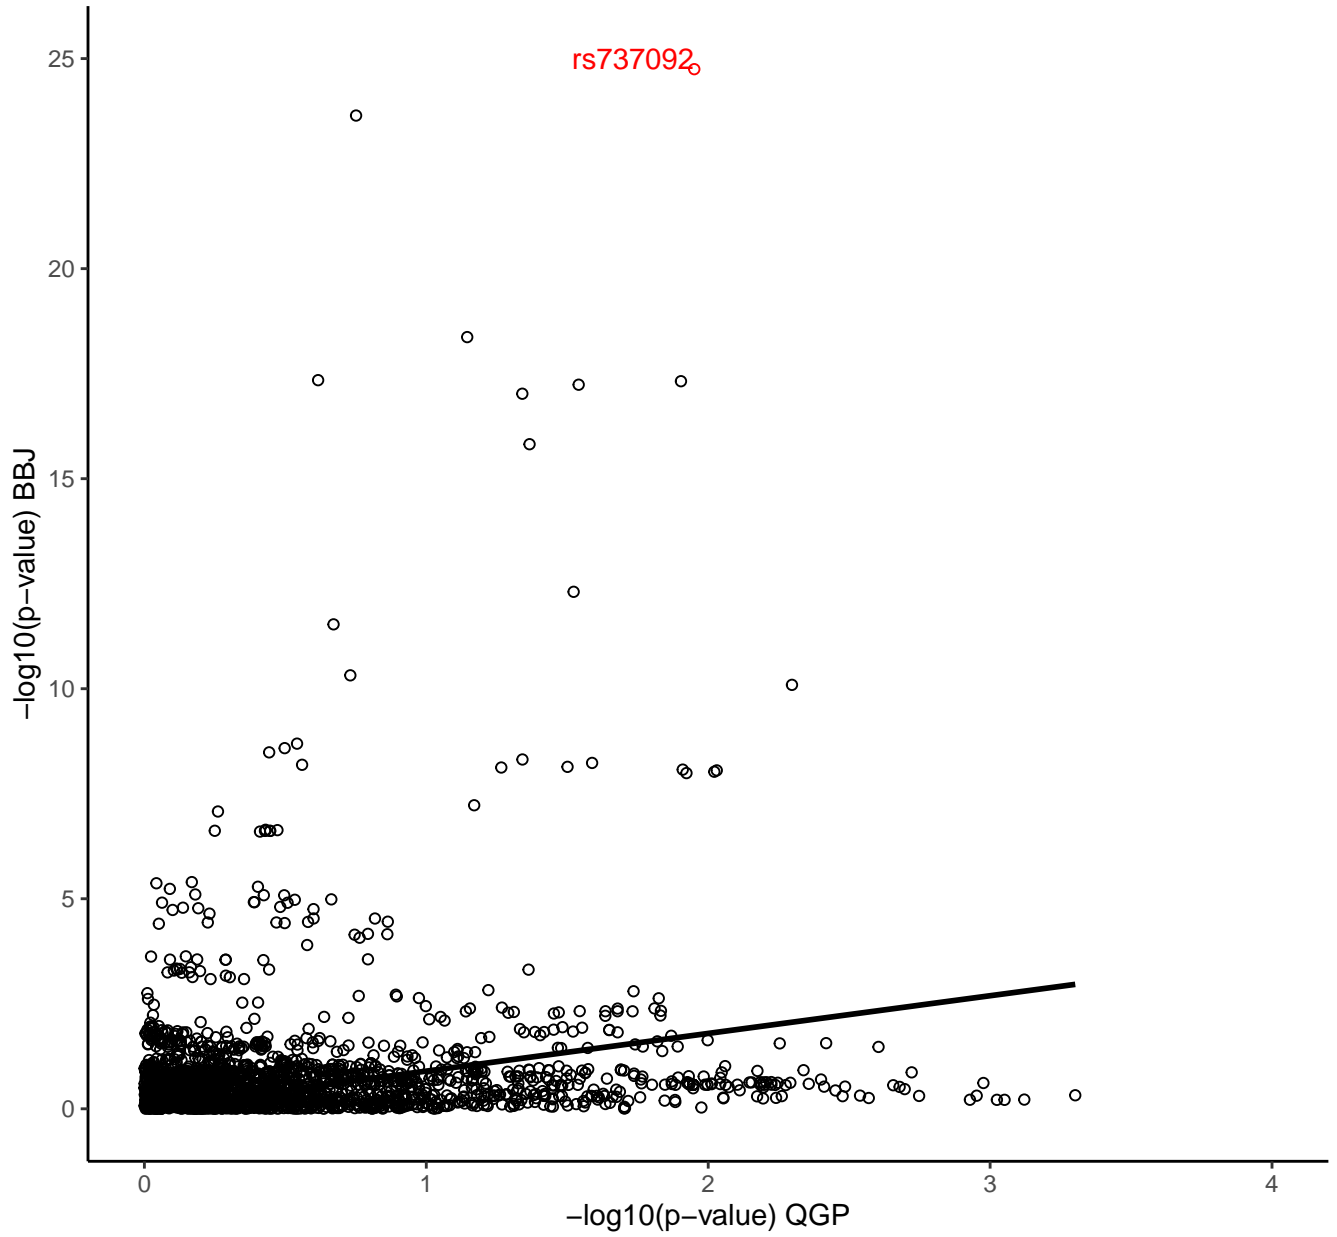

Plt rs1006409

nSNPs = 2549; H2: 0.476; H3: 0.41; H4: 0.114

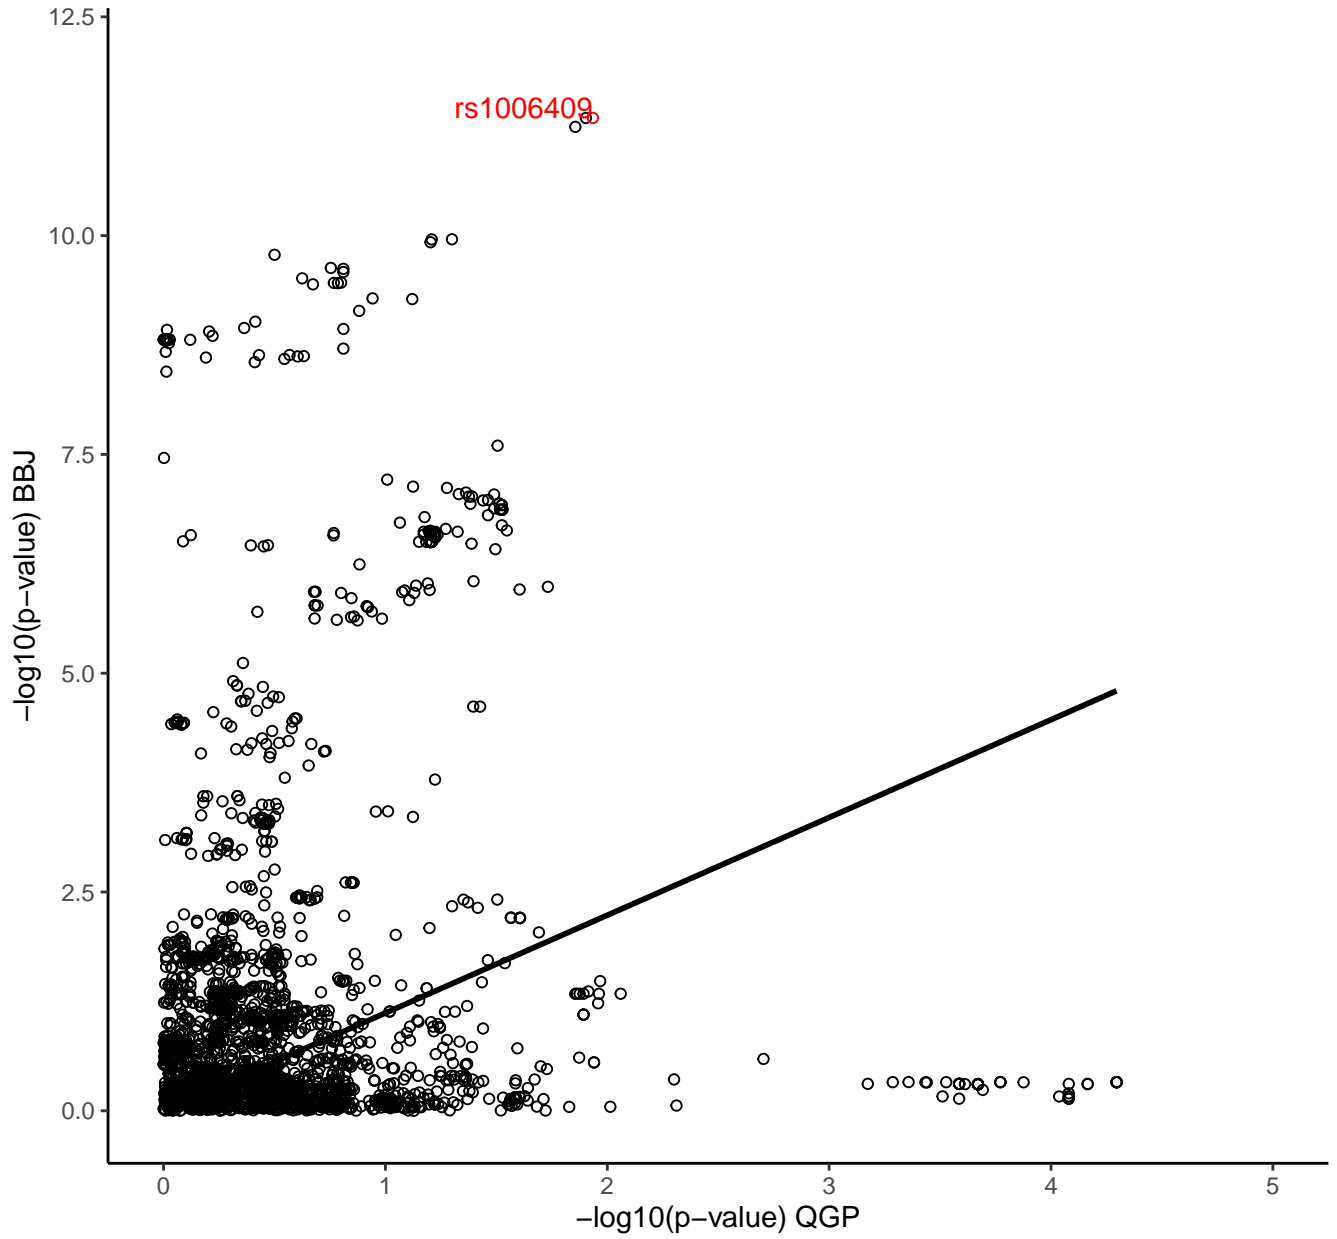

sCr rs7212715

nSNPs = 1025; H2: 0.654; H3: 0.0892; H4: 0.257

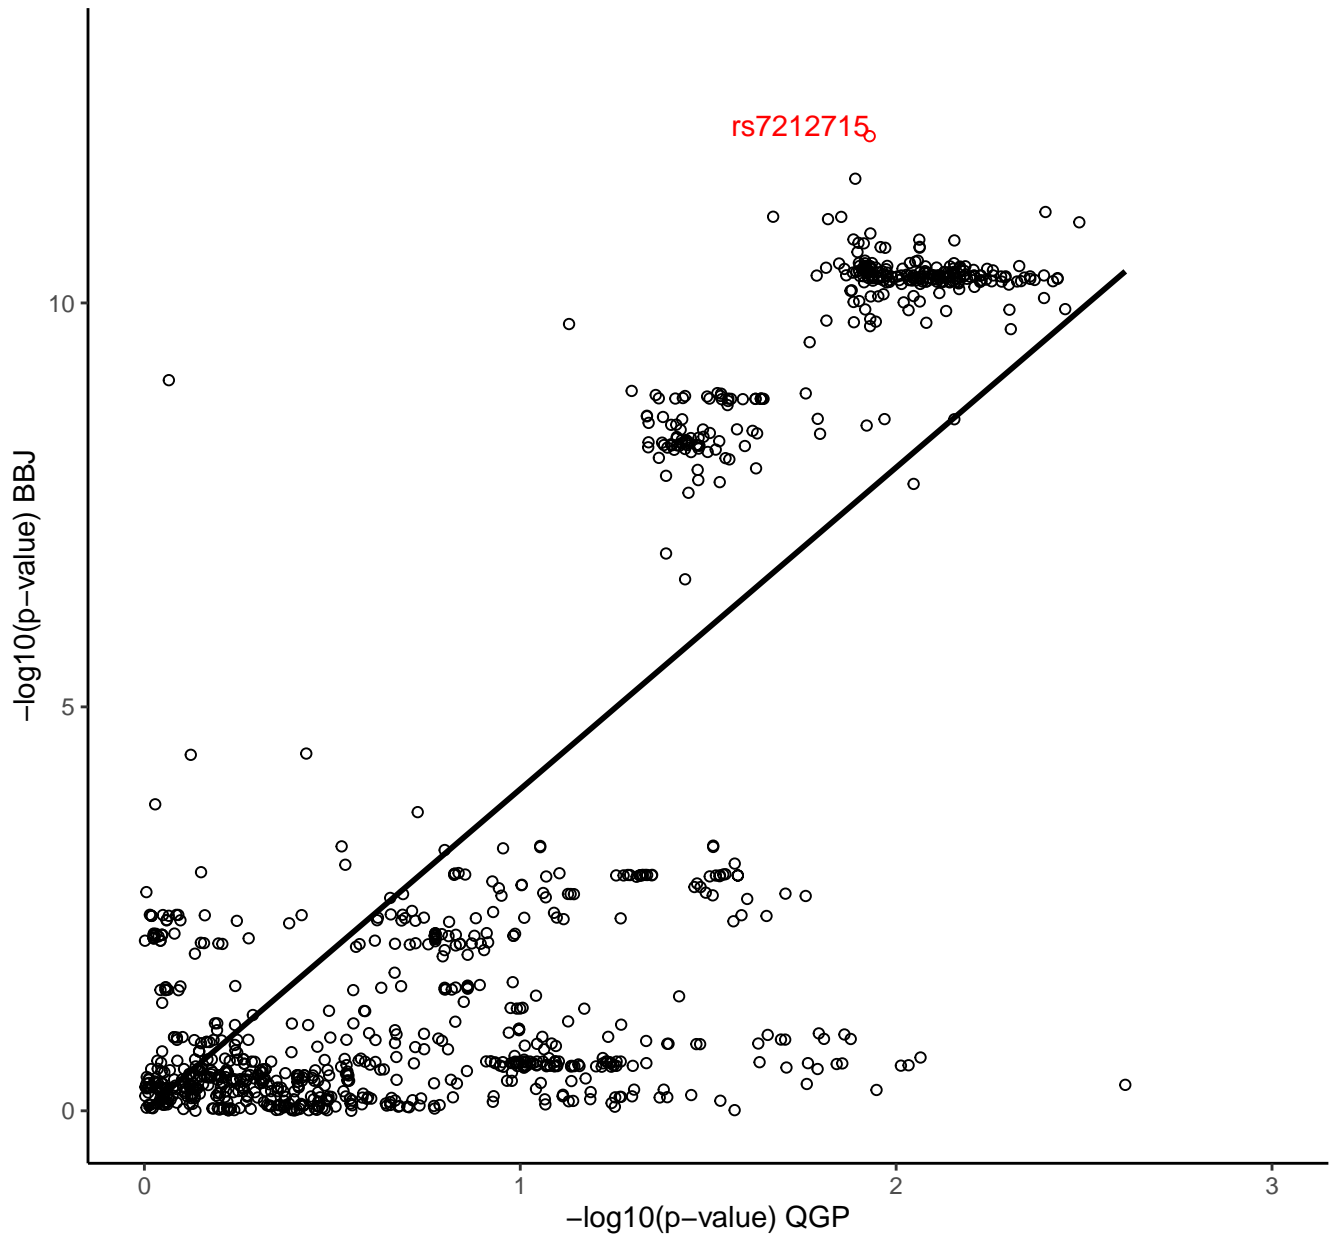

TC rs12713468

nSNPs = 1105; H2: 0.803; H3: 0.0394; H4: 0.152

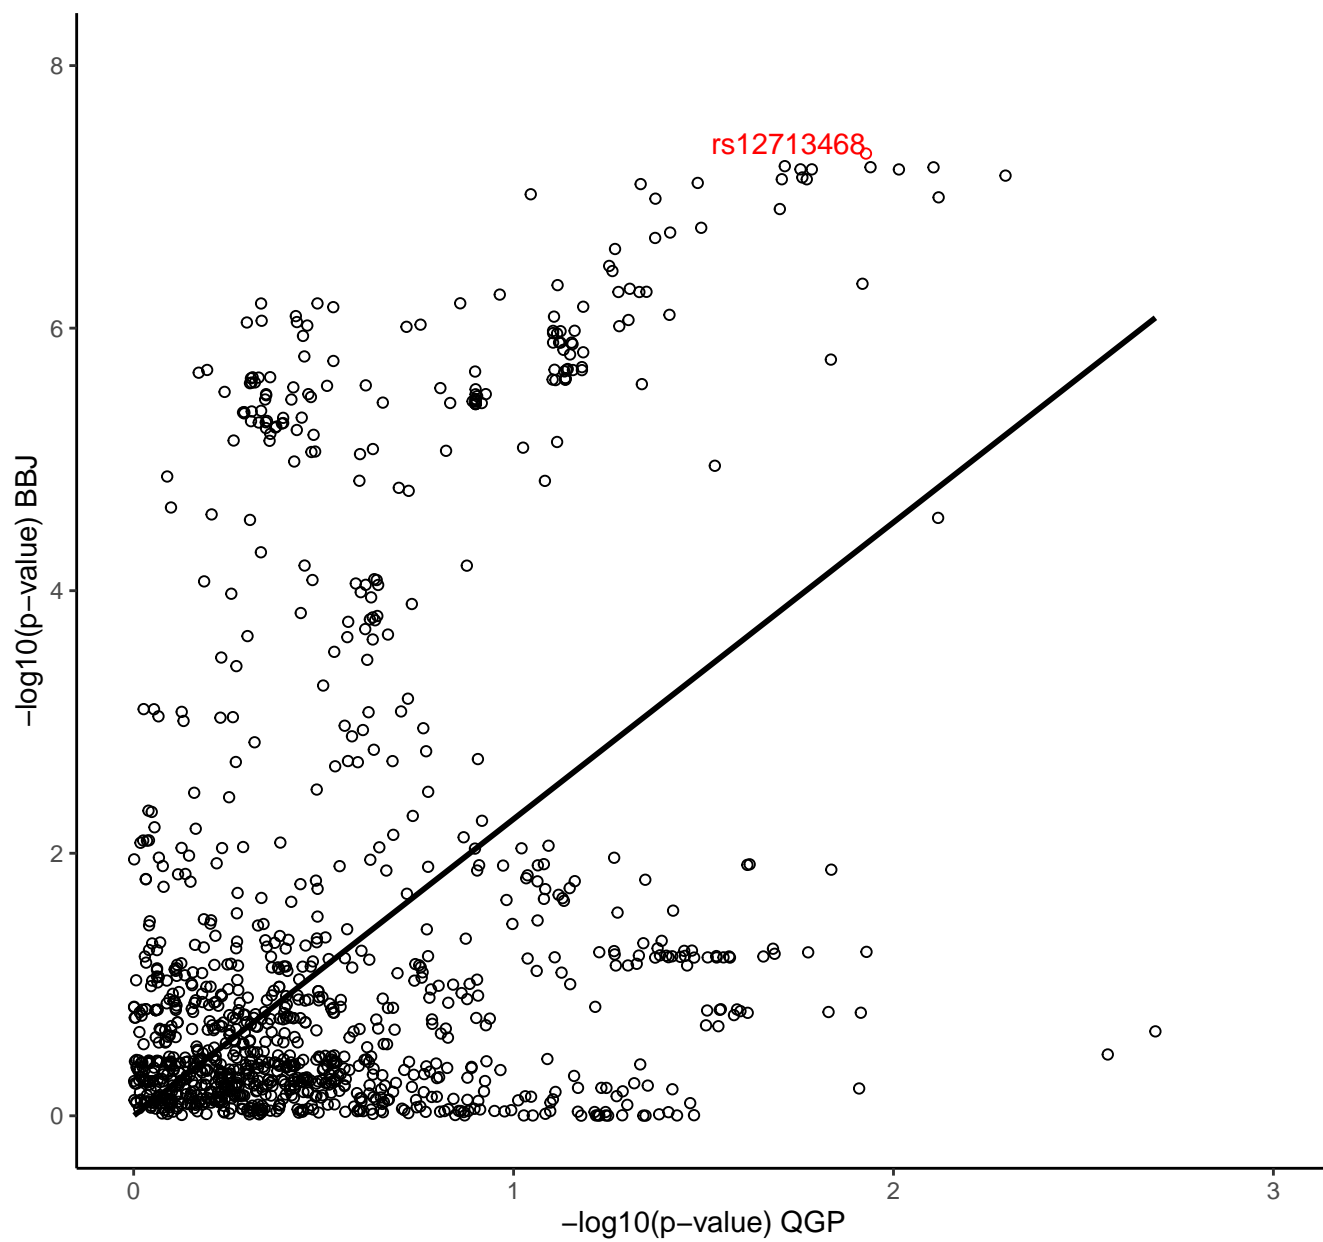

Alb rs1260326

nSNPs = 708; H2: 0.794; H3: 0.0141; H4: 0.192

rs1260326

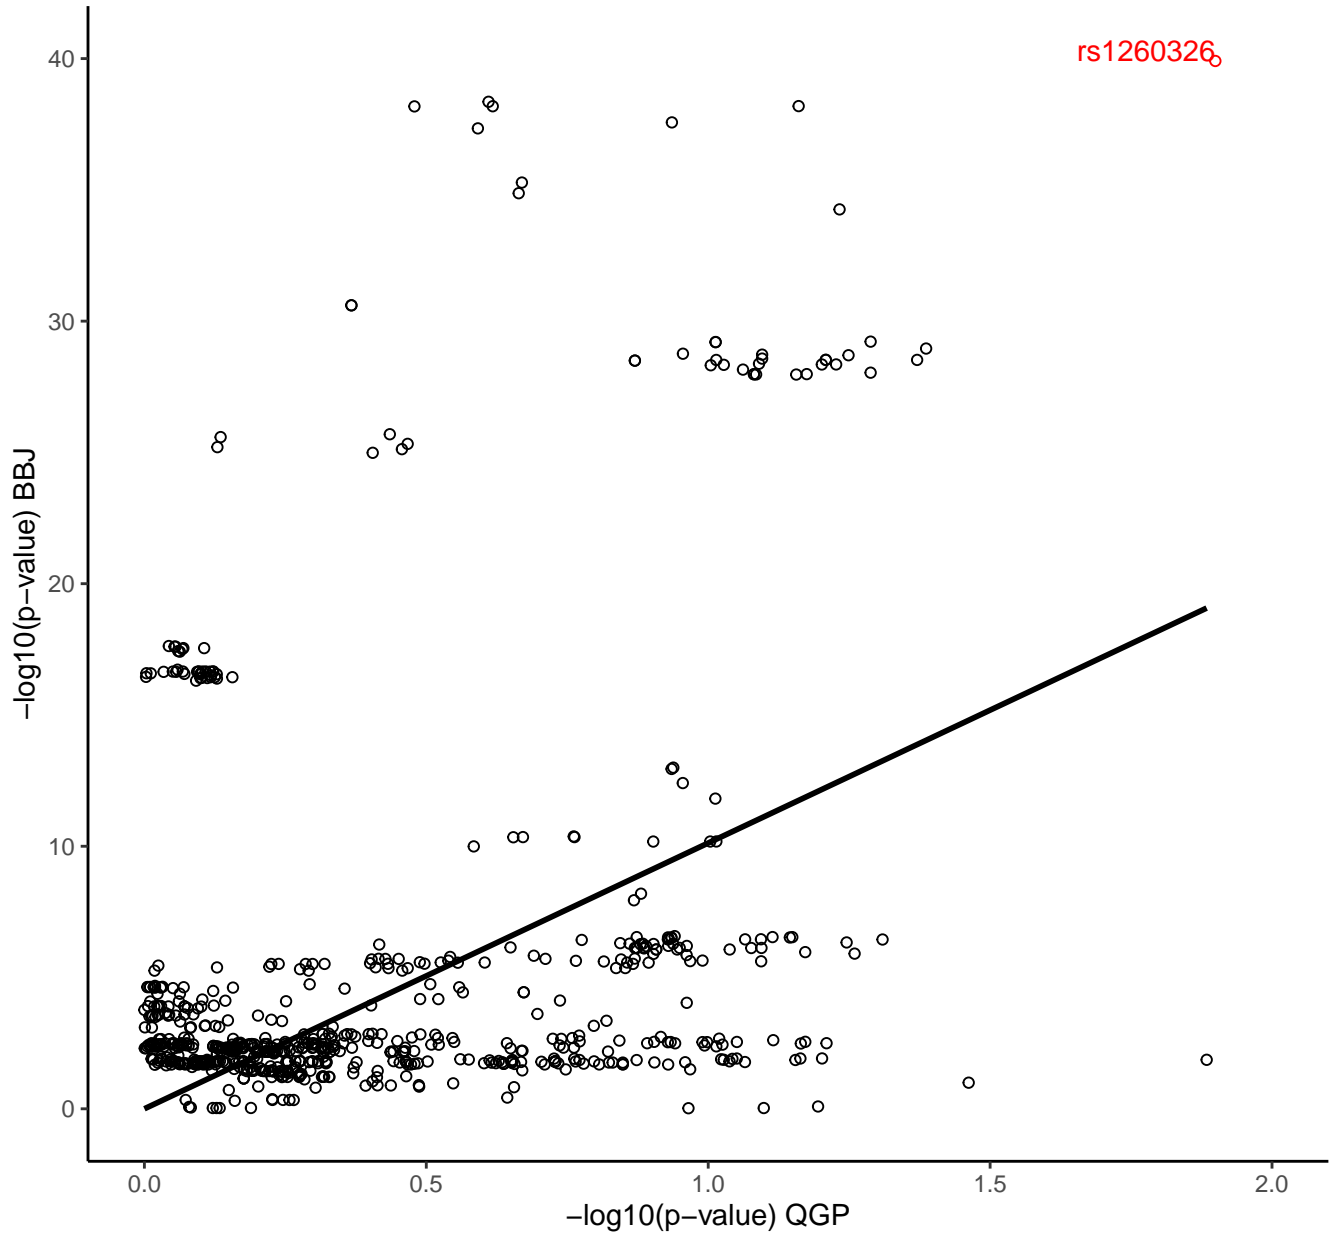



UA rs4724828

nSNPs = 1657; H2: 0.643; H3: 0.0474; H4: 0.294

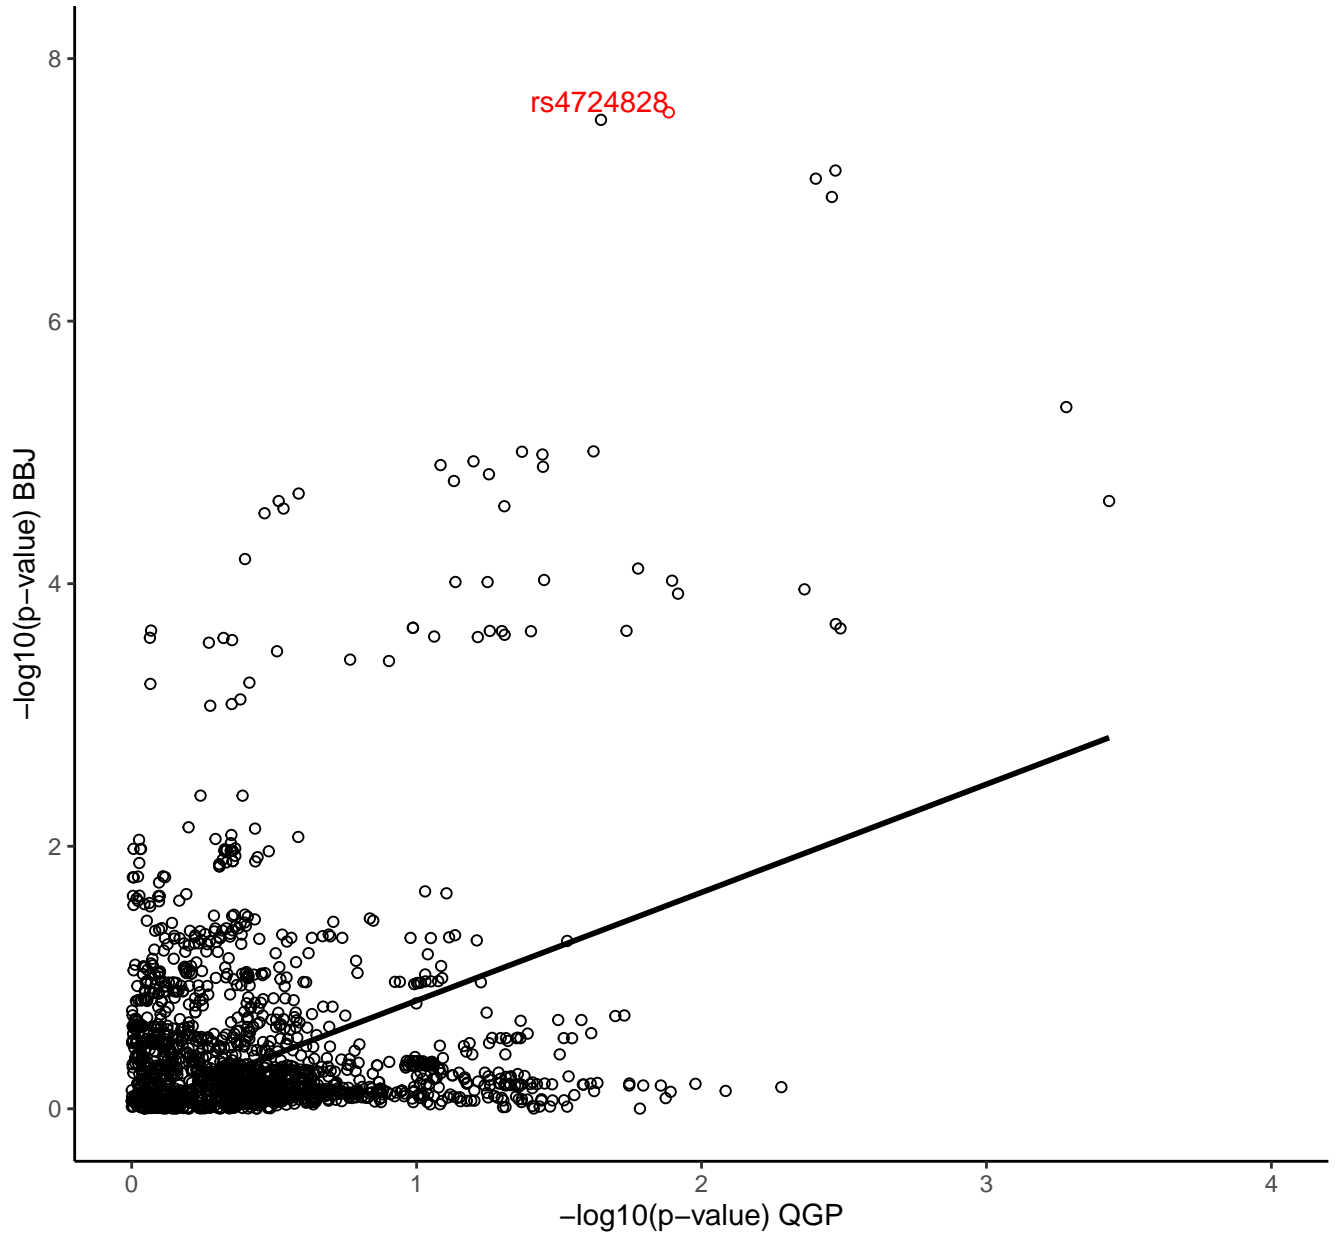

sCr rs12935539

nSNPs = 1697; H2: 0.763; H3: 0.0466; H4: 0.189

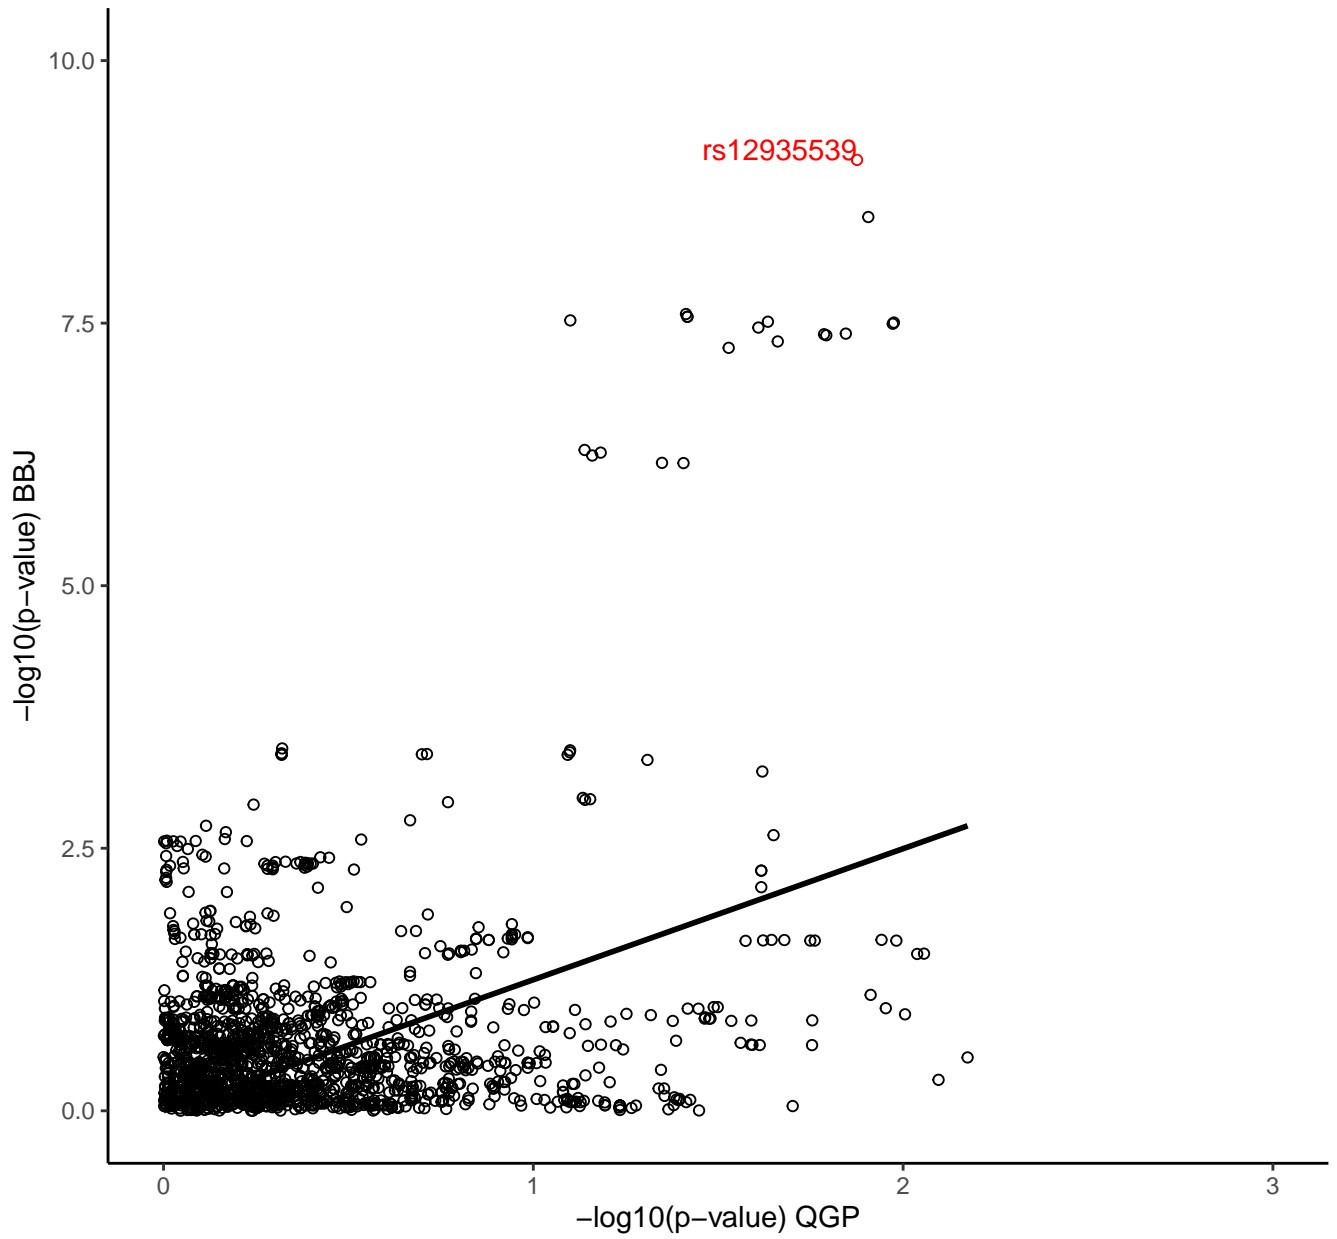

Plt rs12041331

nSNPs = 1849; H2: 0.715; H3: 0.0716; H4: 0.213

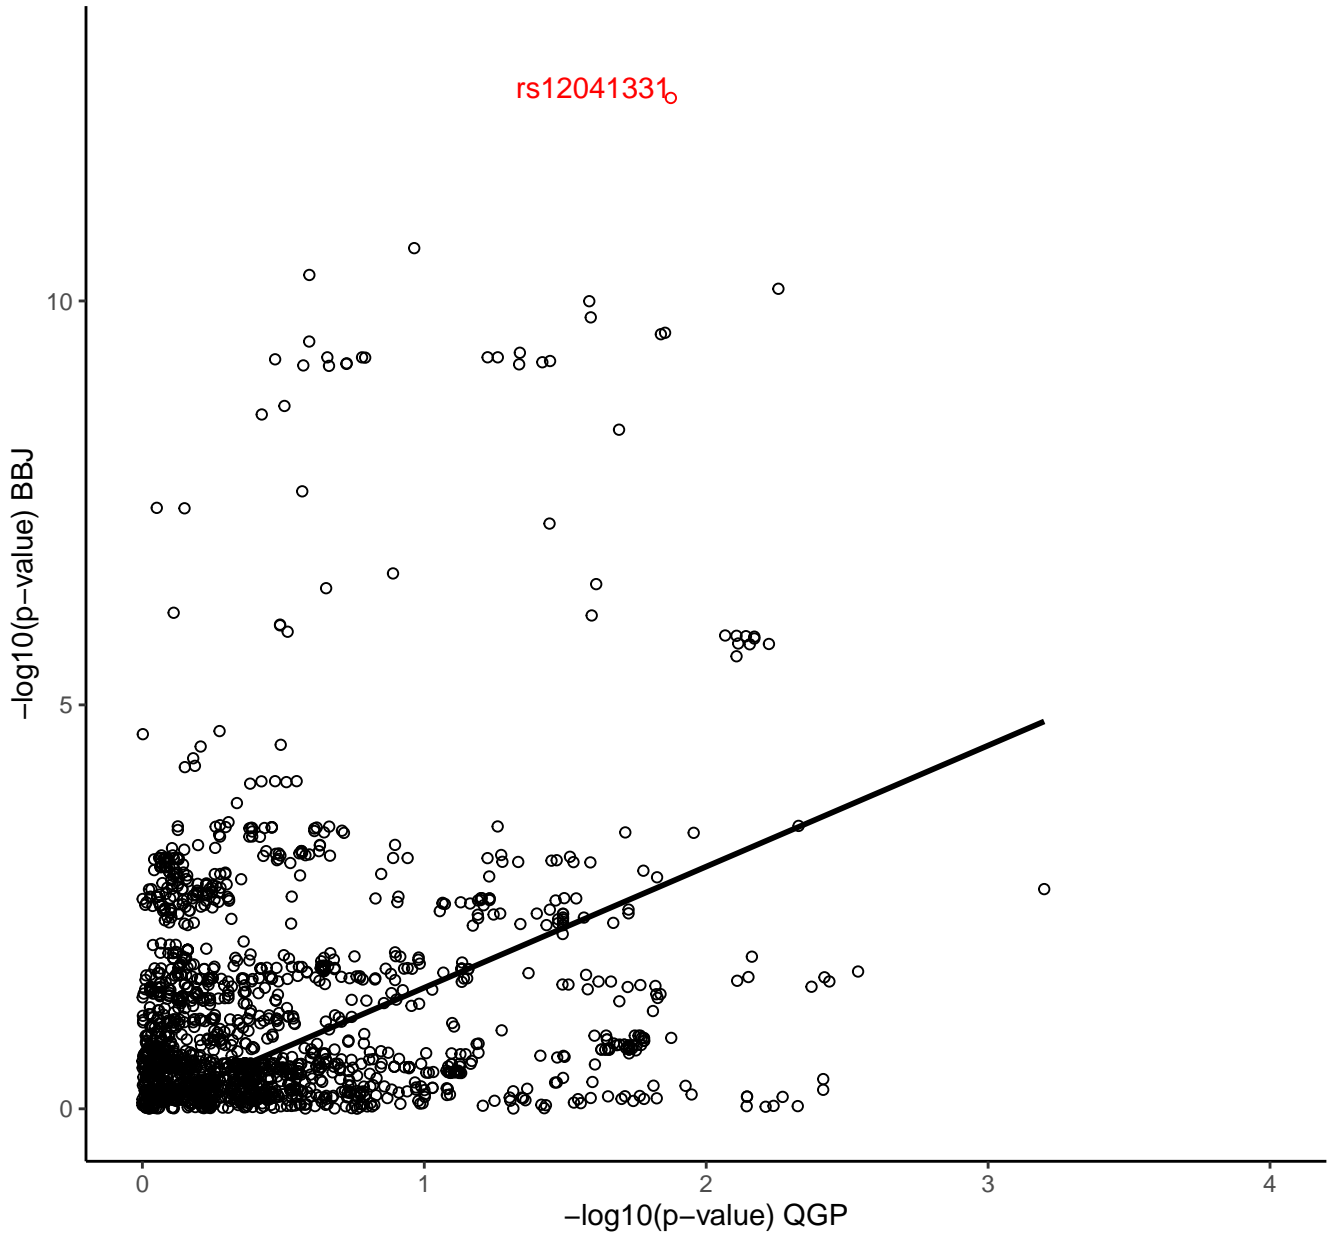

MCV rs10758656

nSNPs = 2291; H2: 0.636; H3: 0.0955; H4: 0.269

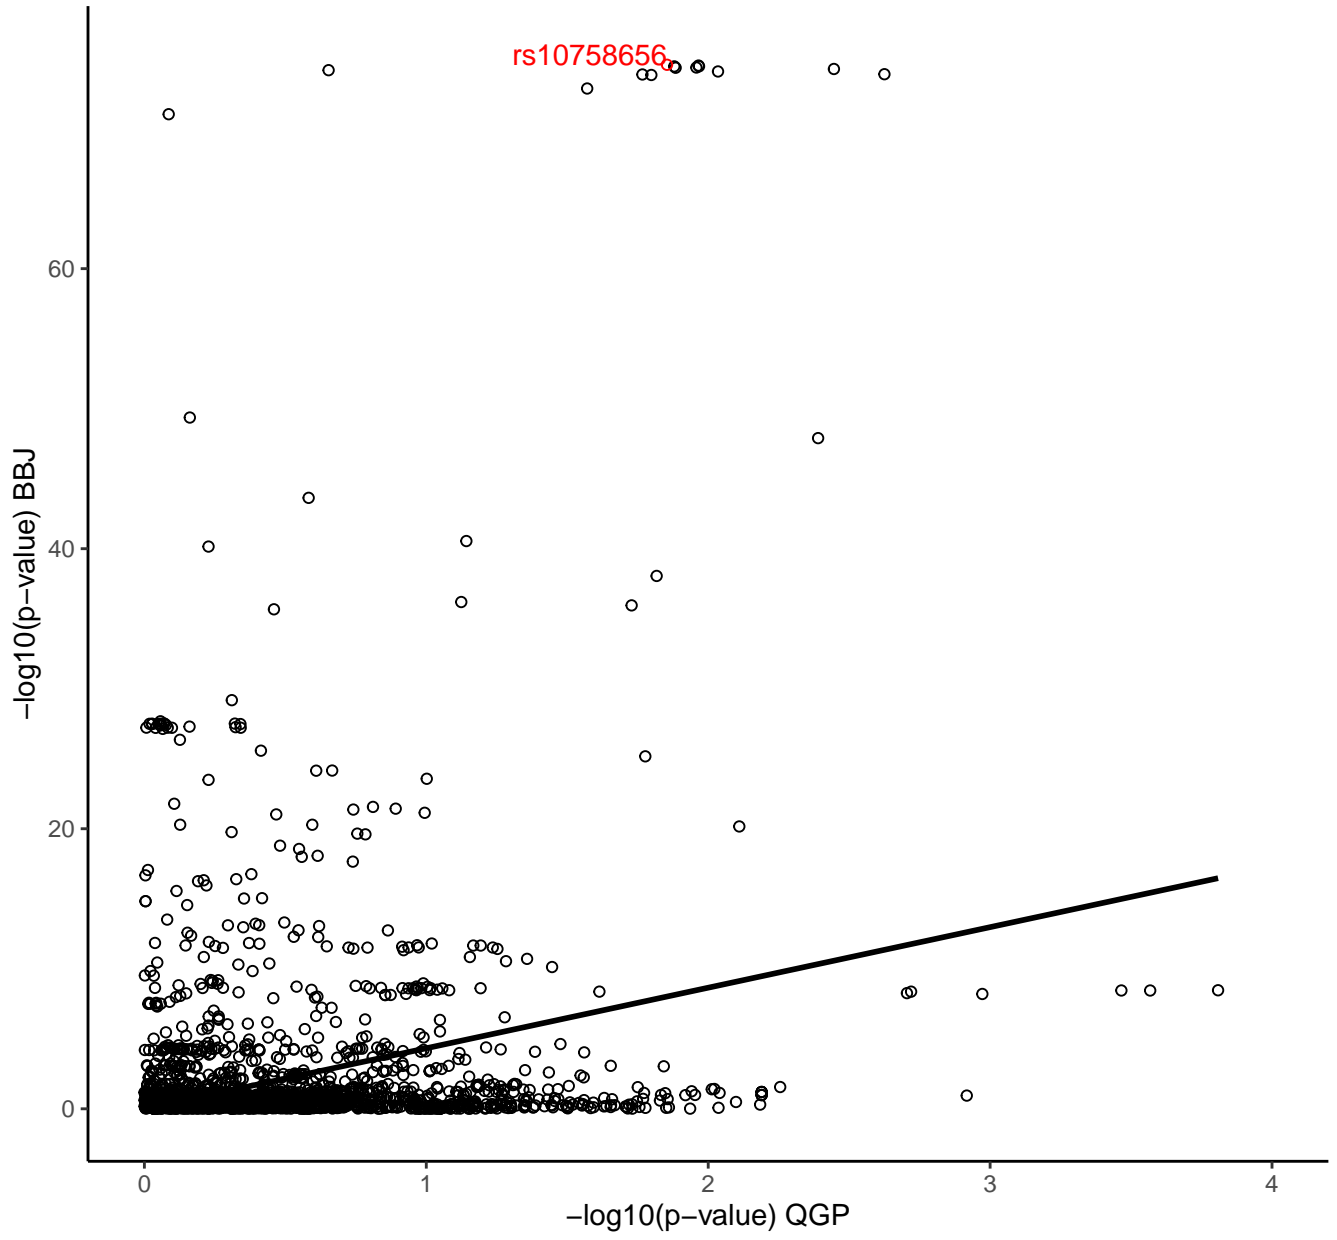

MCV rs2294433

nSNPs = 2266; H2: 0.63; H3: 0.0867; H4: 0.284

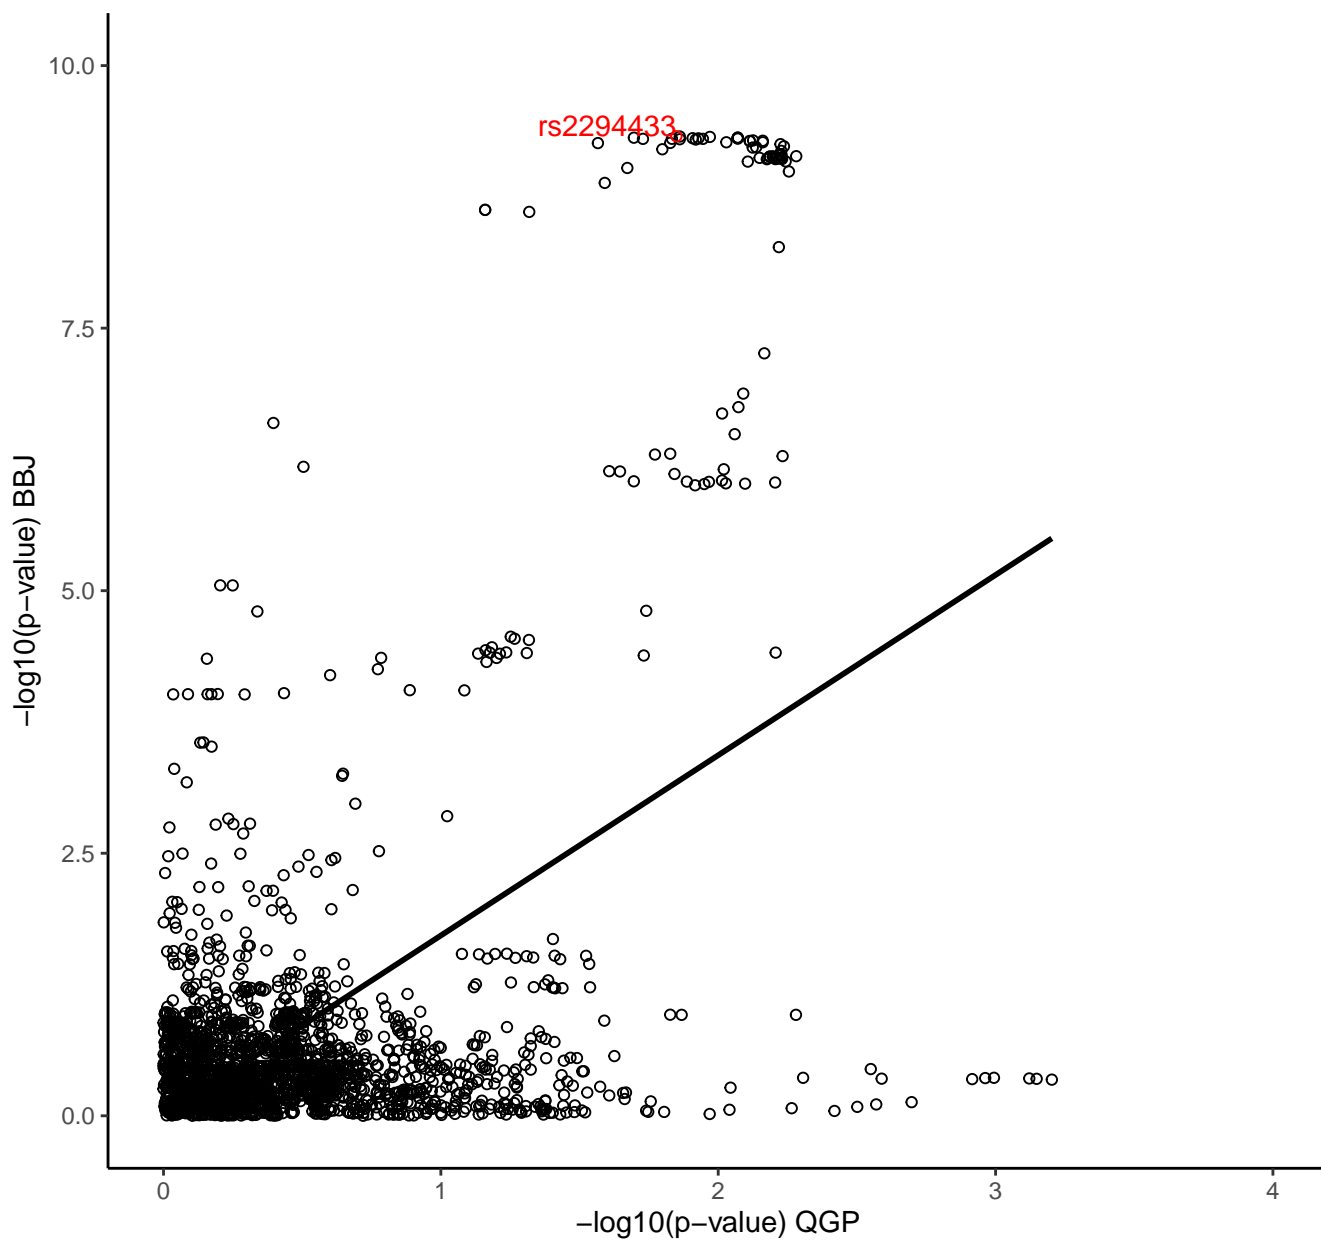

ALP rs10893506

nSNPs = 1971; H2: 0.362; H3: 0.0629; H4: 0.575

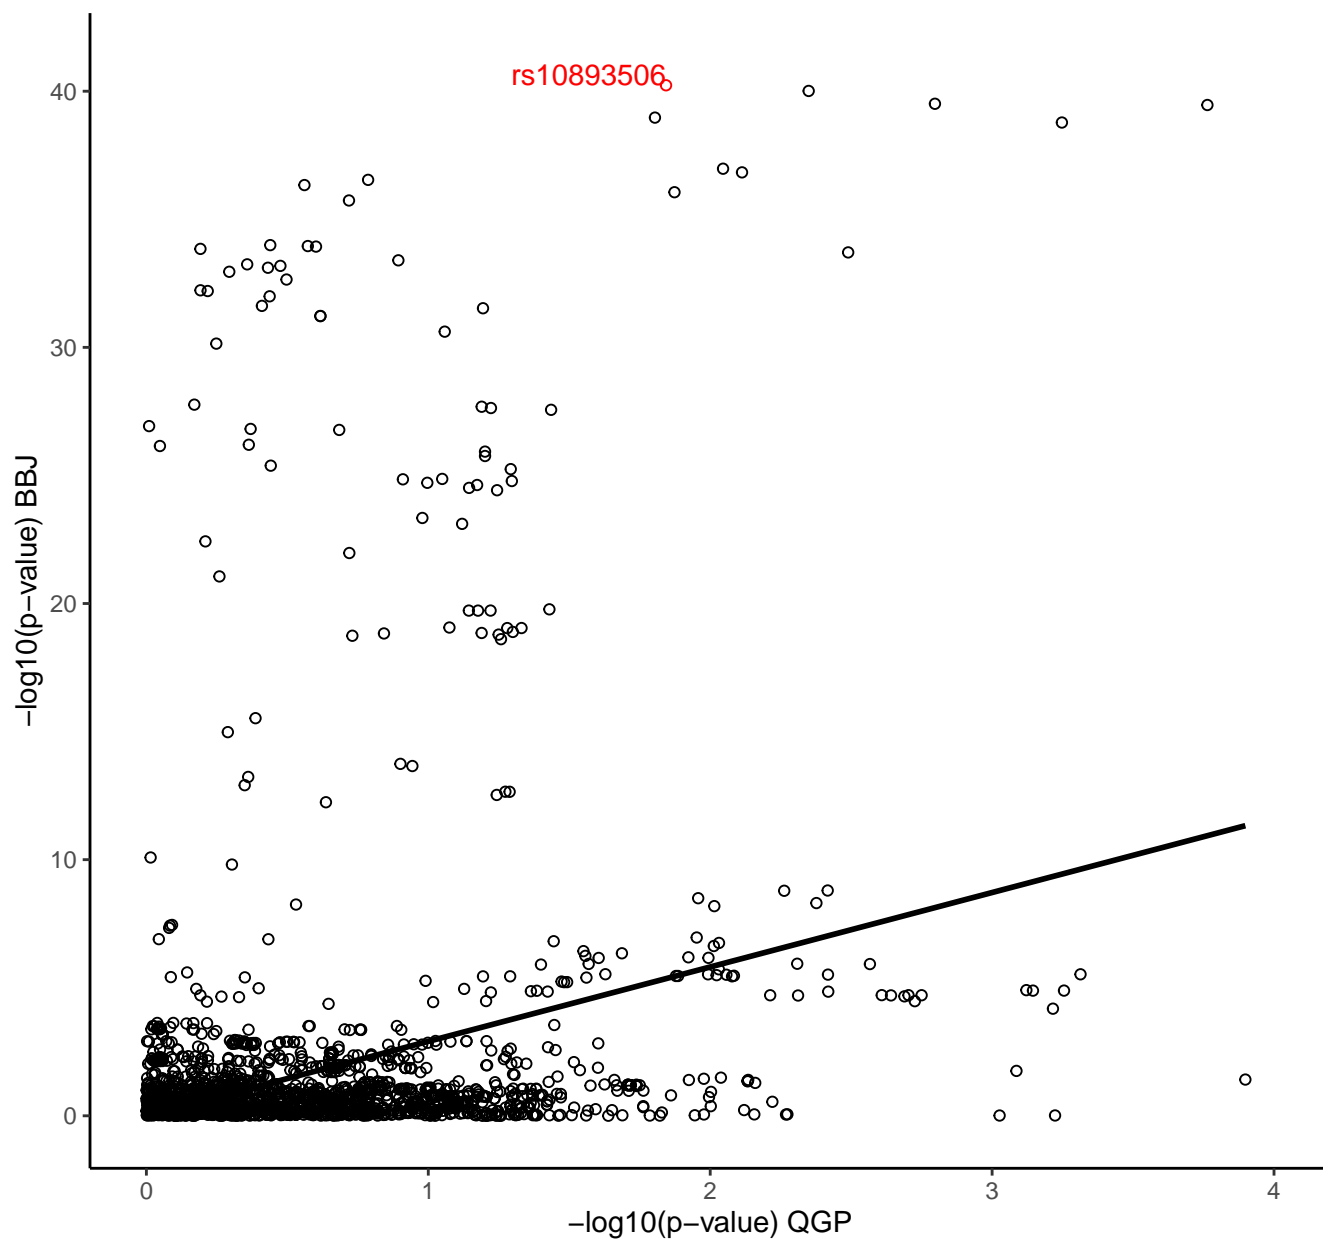

### MCHC rs855791

nSNPs = 1770; H2: 0.769; H3: 0.0469; H4: 0.184

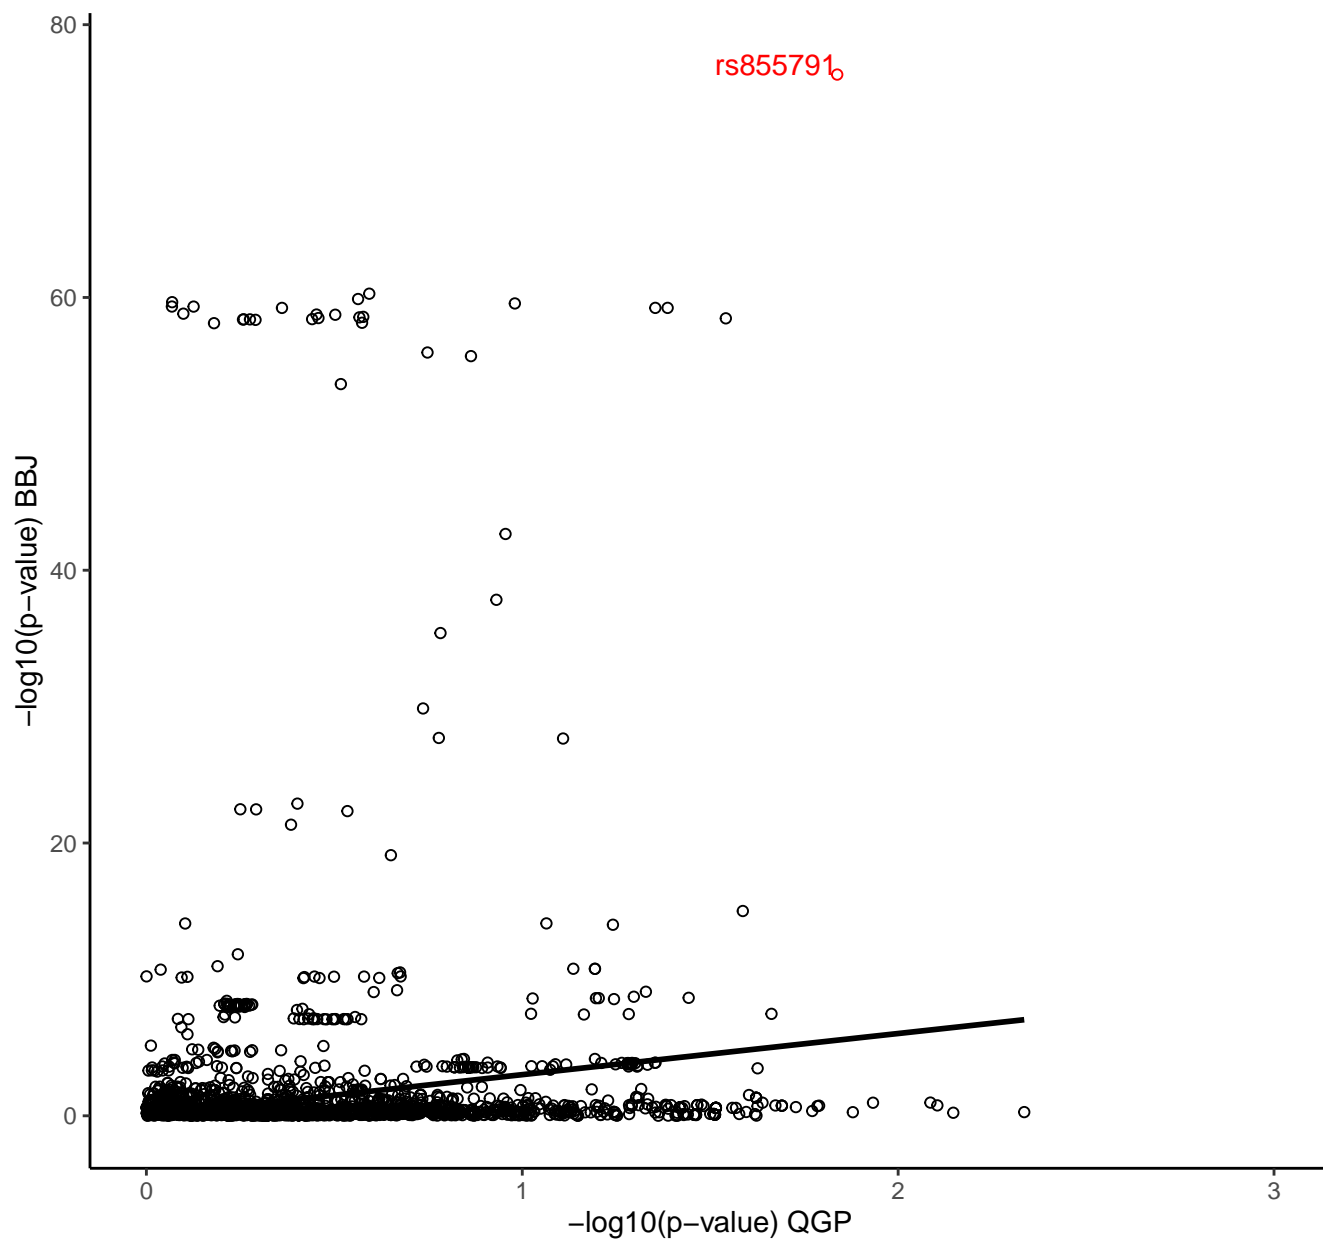

Ht rs10953299

nSNPs = 866; H2: 0.292; H3: 0.618; H4: 0.0899

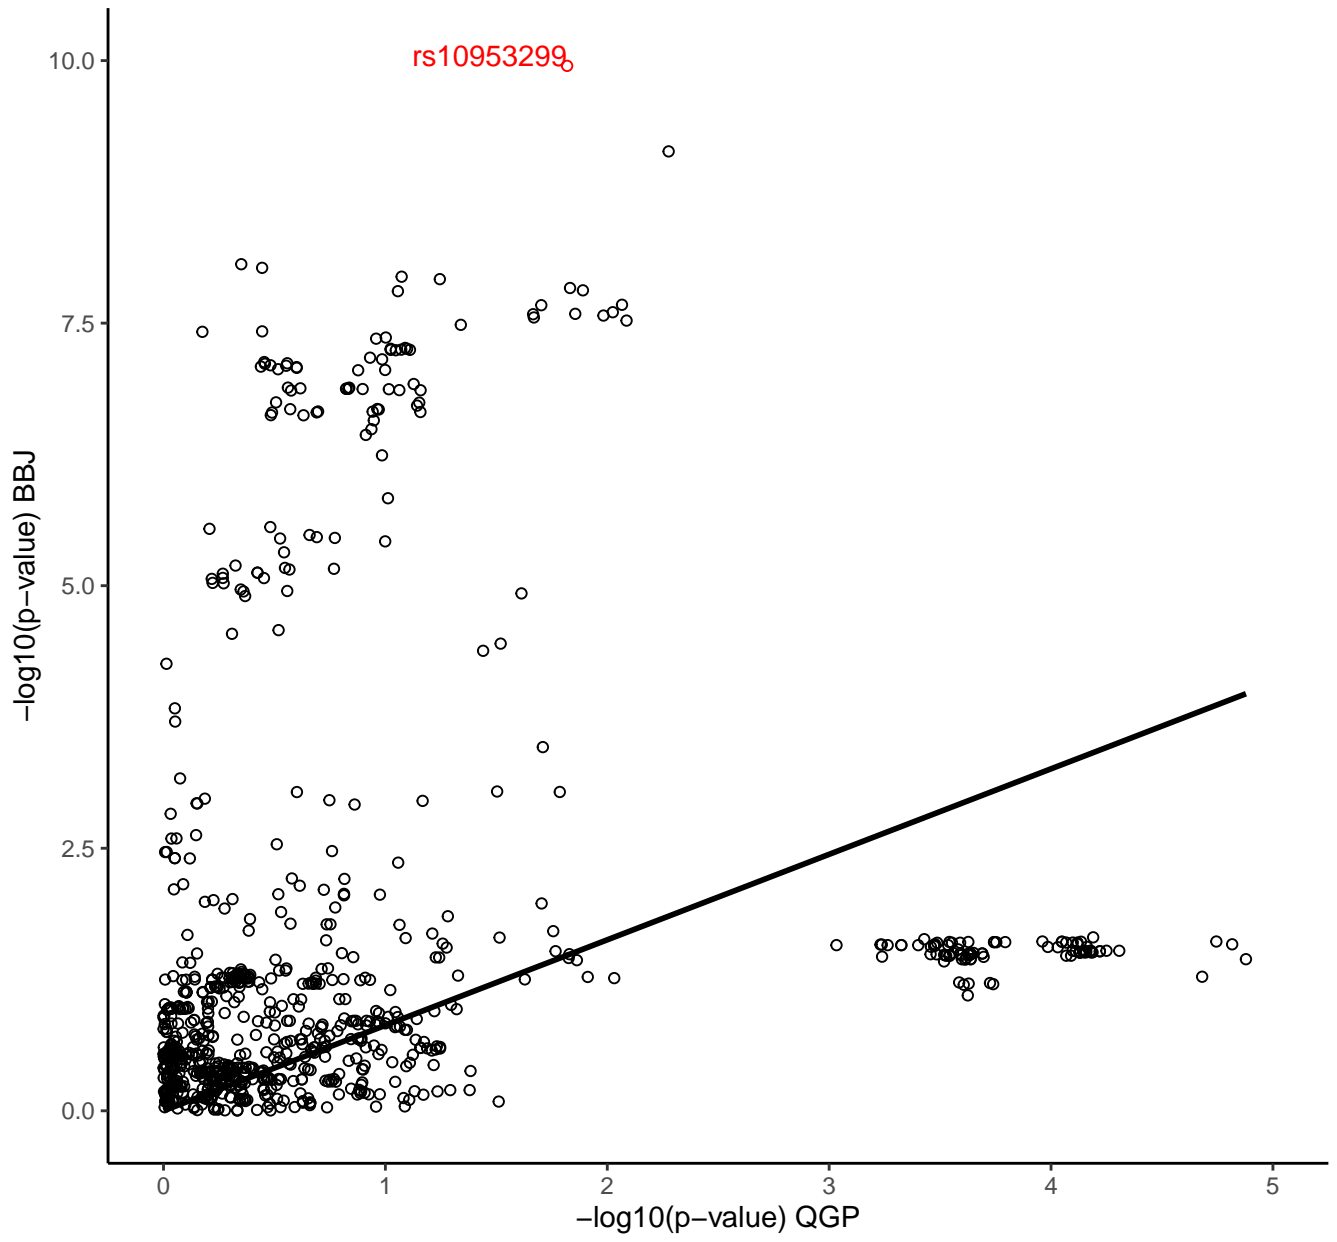



Plt rs10876550

nSNPs = 1055; H2: 0.823; H3: 0.0339; H4: 0.143

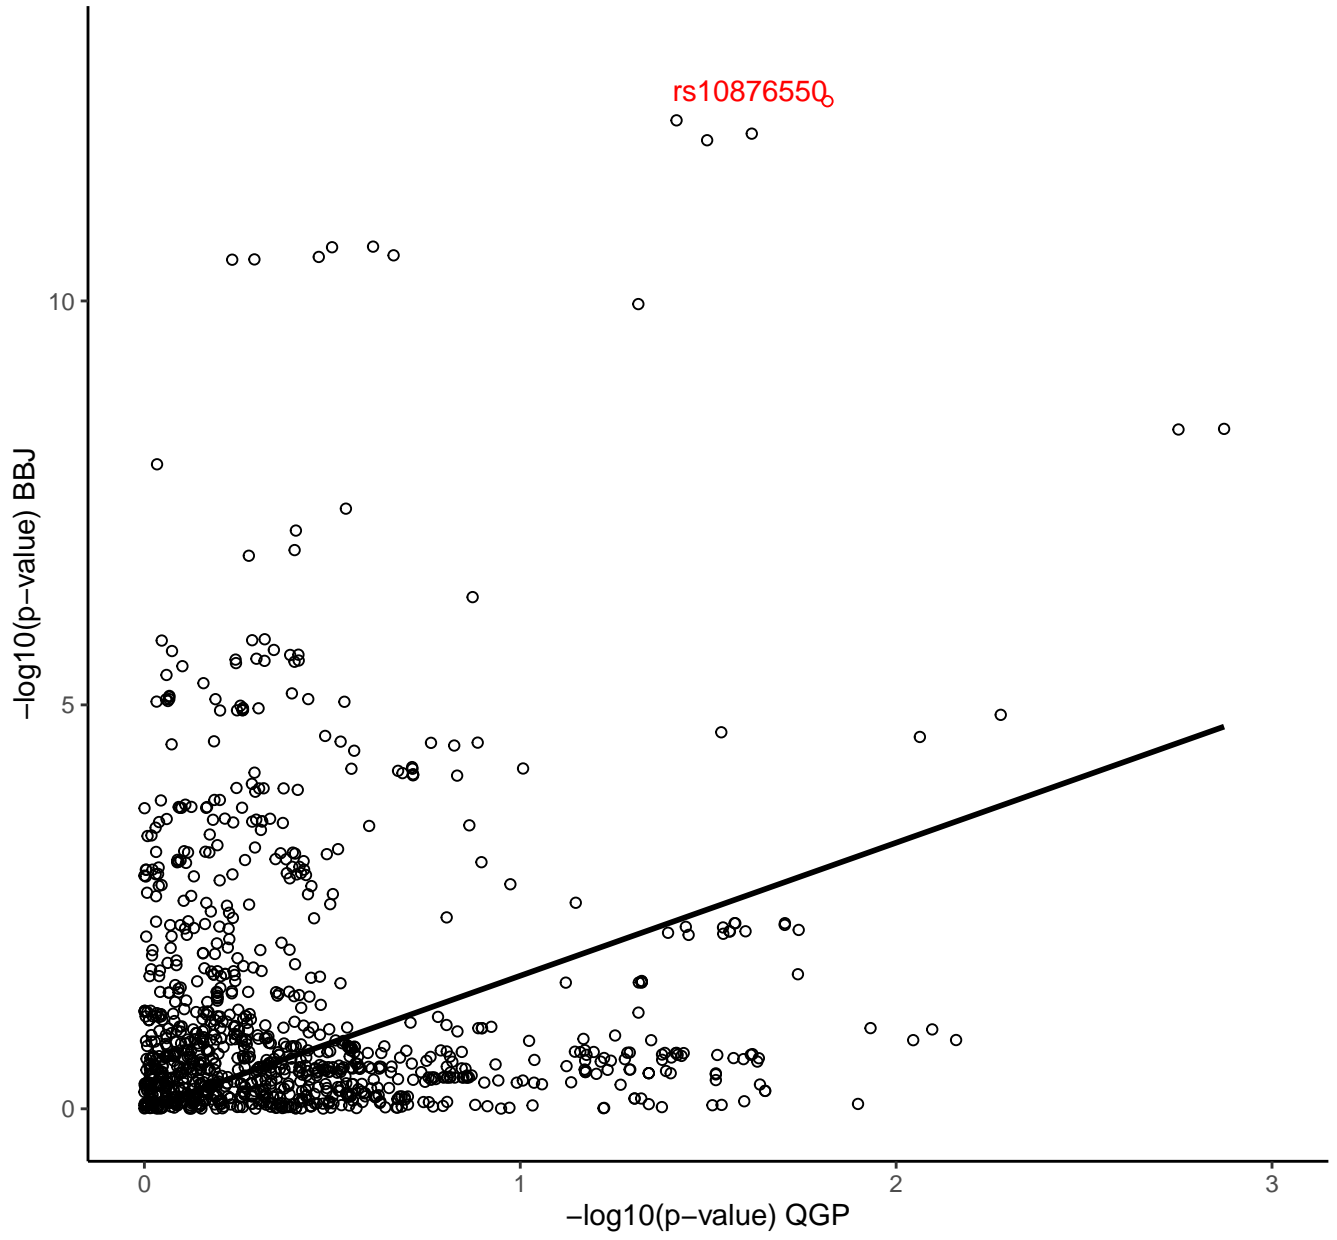

sCr rs35985639

nSNPs = 1649; H2: 0.741; H3: 0.0798; H4: 0.17

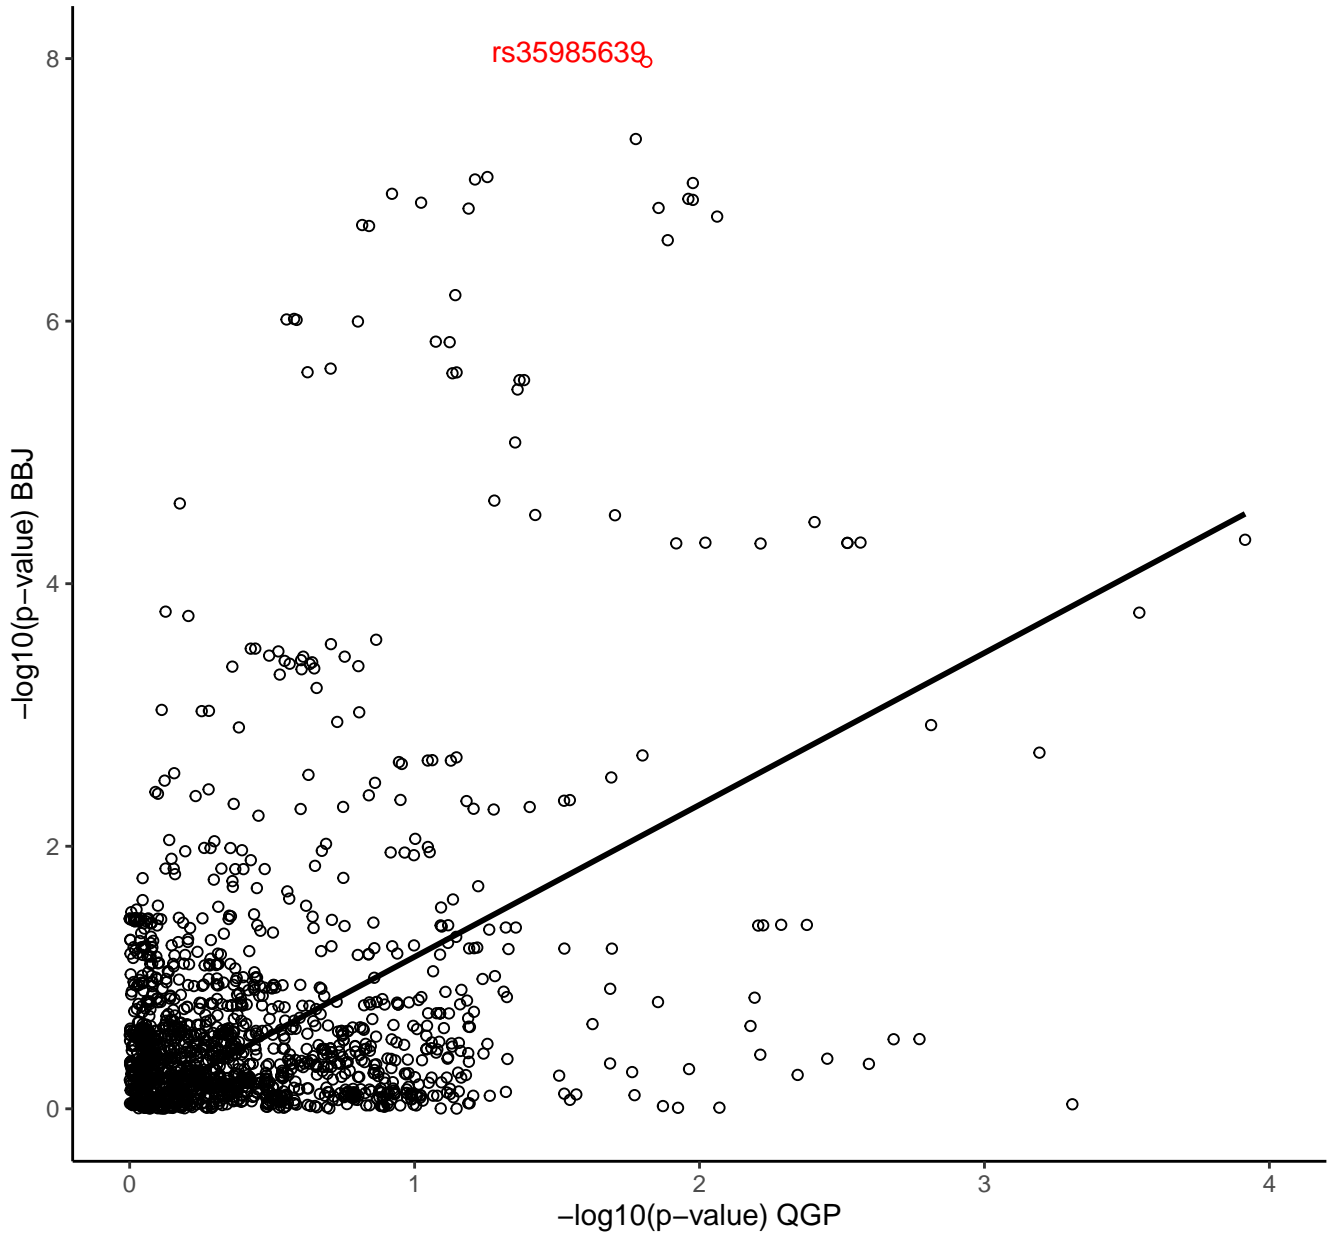

HDL-C rs2925979

nSNPs = 3114; H2: 0.674; H3: 0.175; H4: 0.151

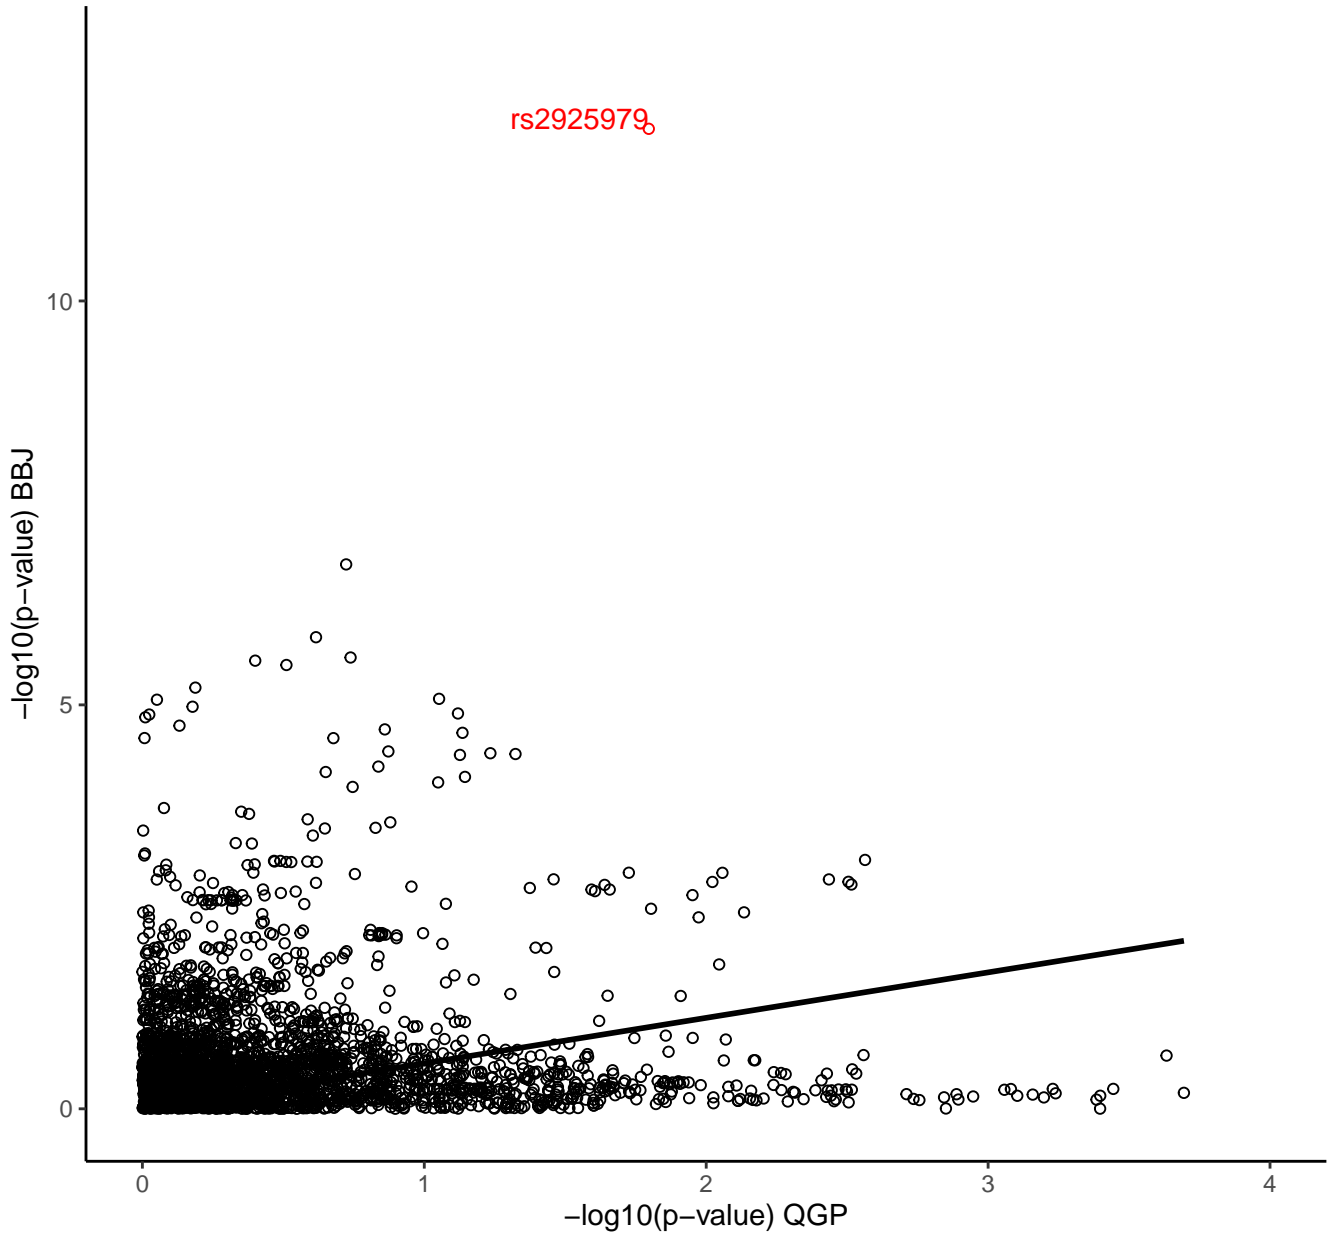

TP rs4598207

nSNPs = 1928; H2: 0.666; H3: 0.218; H4: 0.116

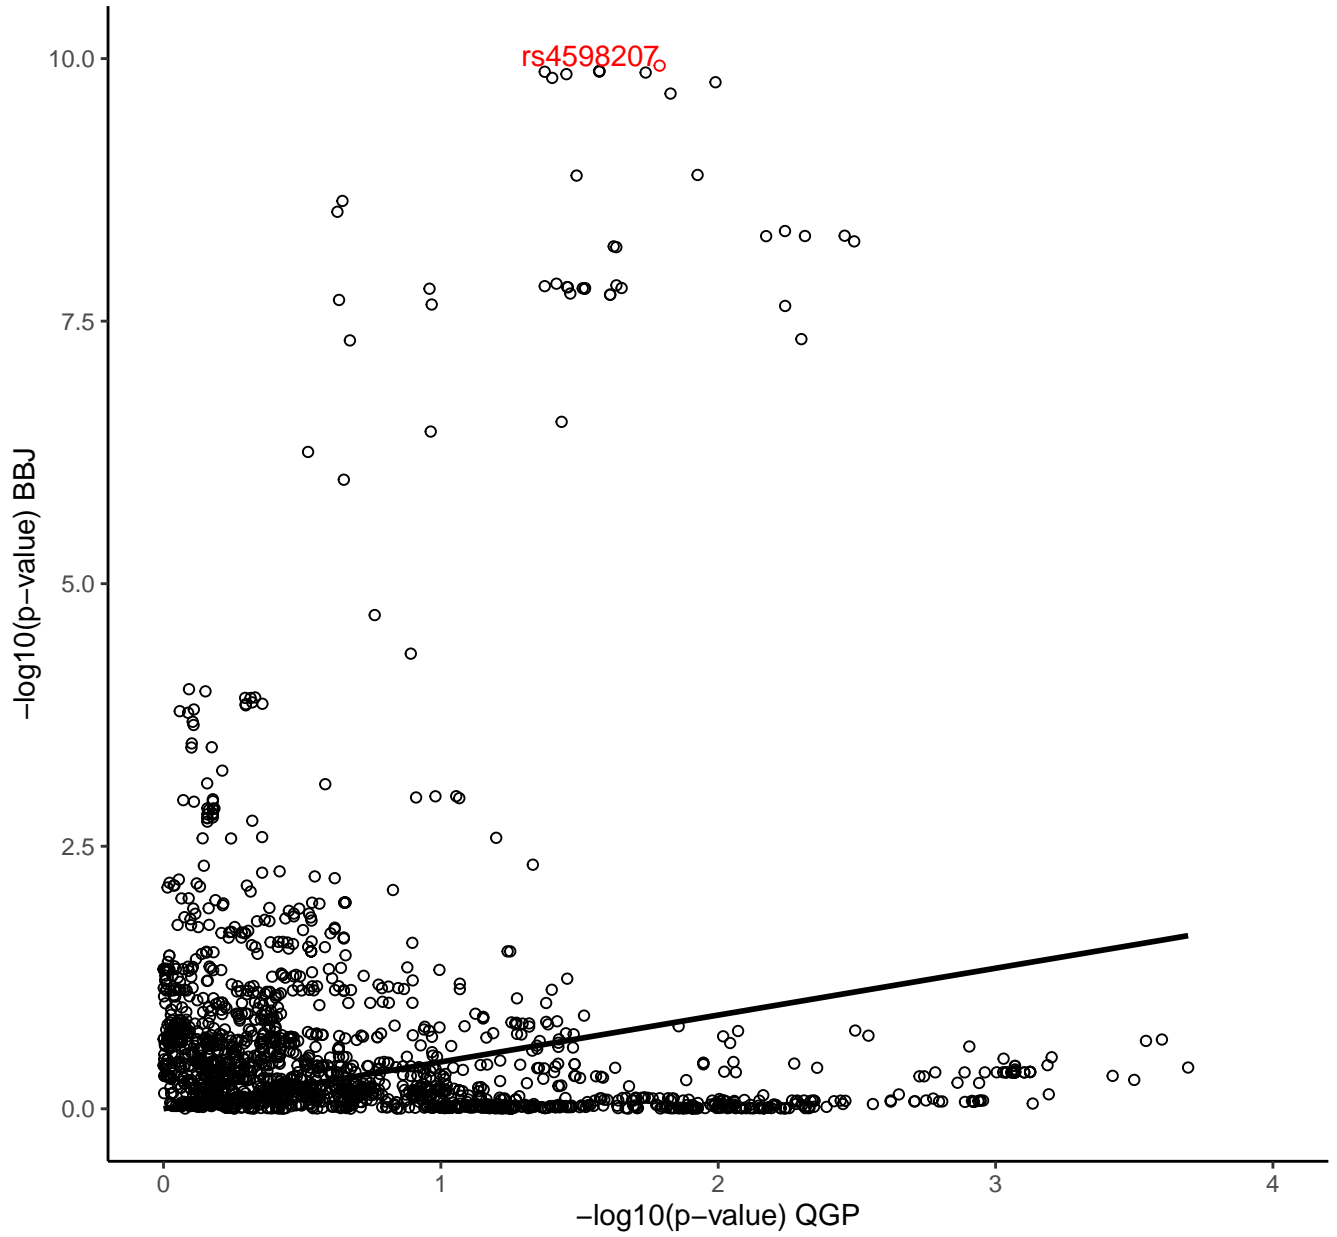

### MCH rs9349205

nSNPs = 1349; H2: 0.755; H3: 0.0568; H4: 0.189

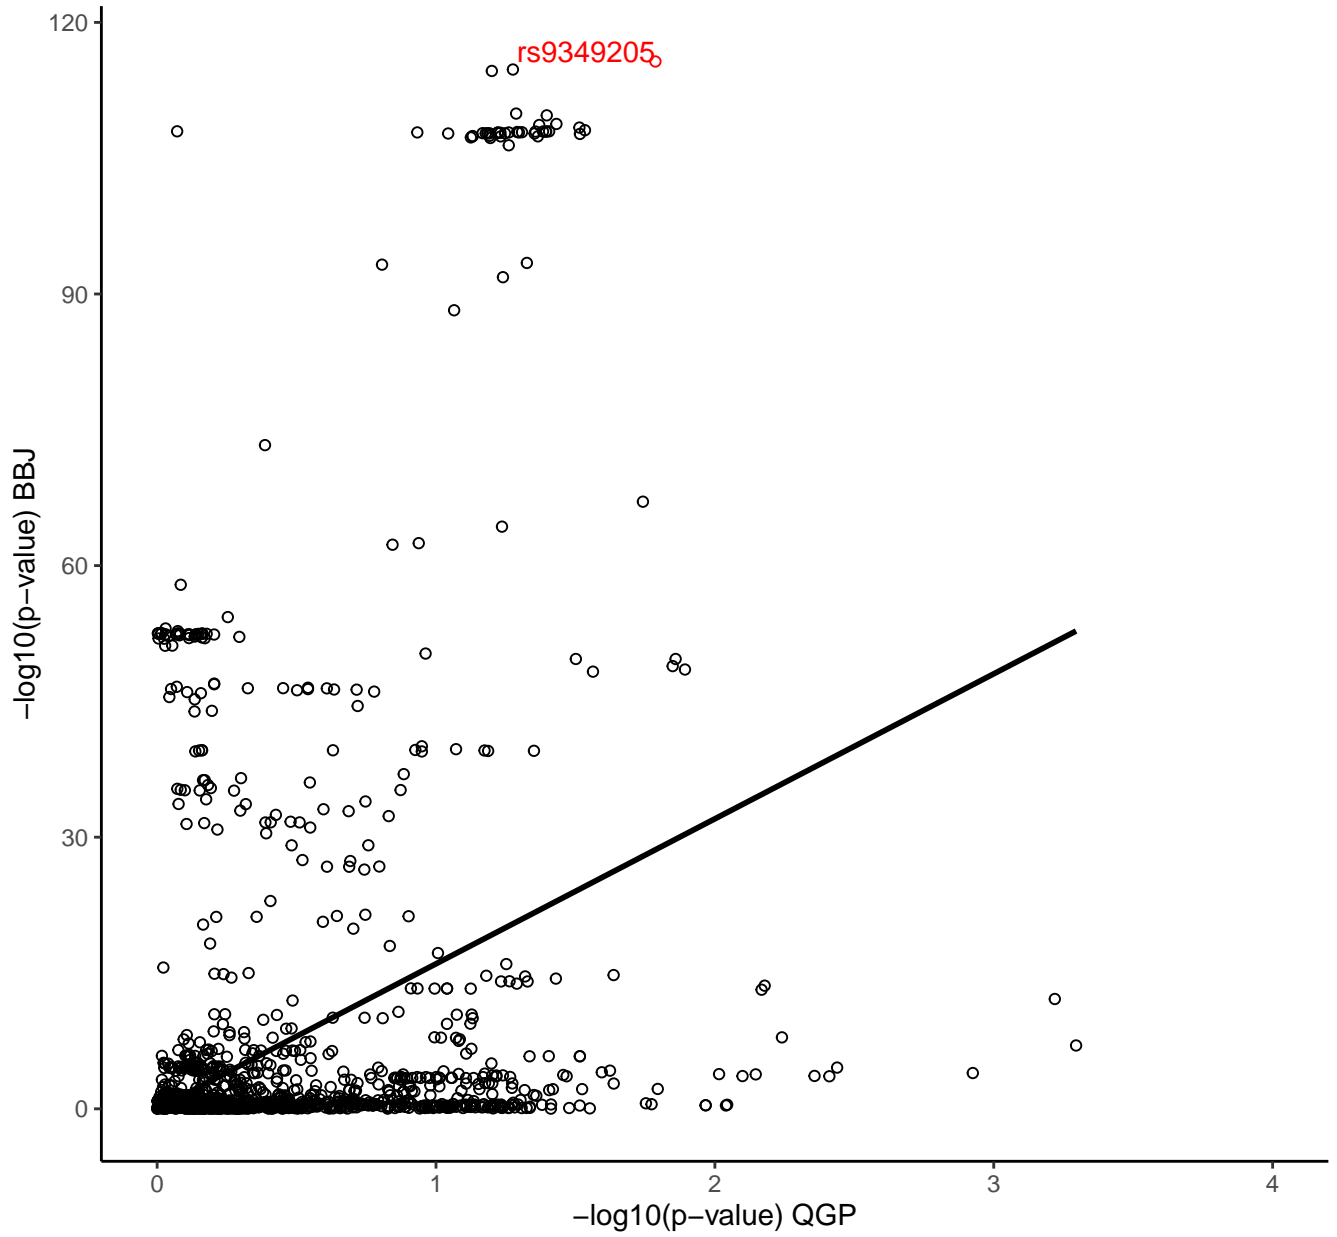

TP rs9551440

nSNPs = 1886; H2: 0.75; H3: 0.0752; H4: 0.173

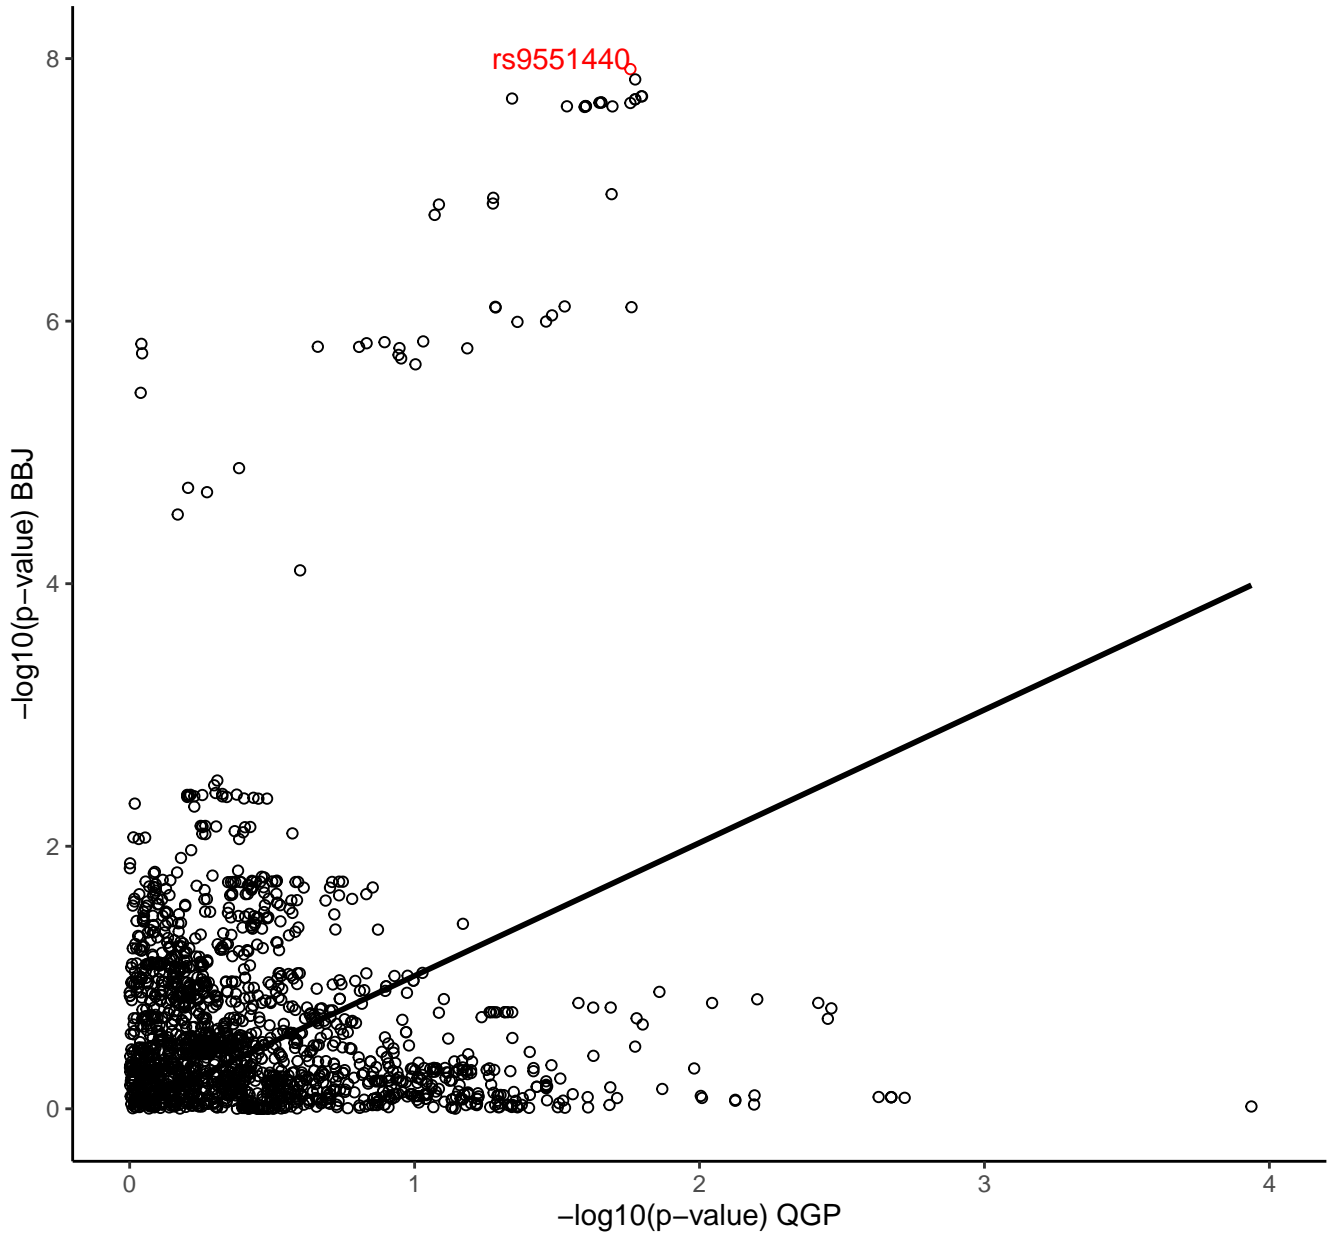

AST rs10509735

nSNPs = 1293; H2: 0.535; H3: 0.357; H4: 0.108

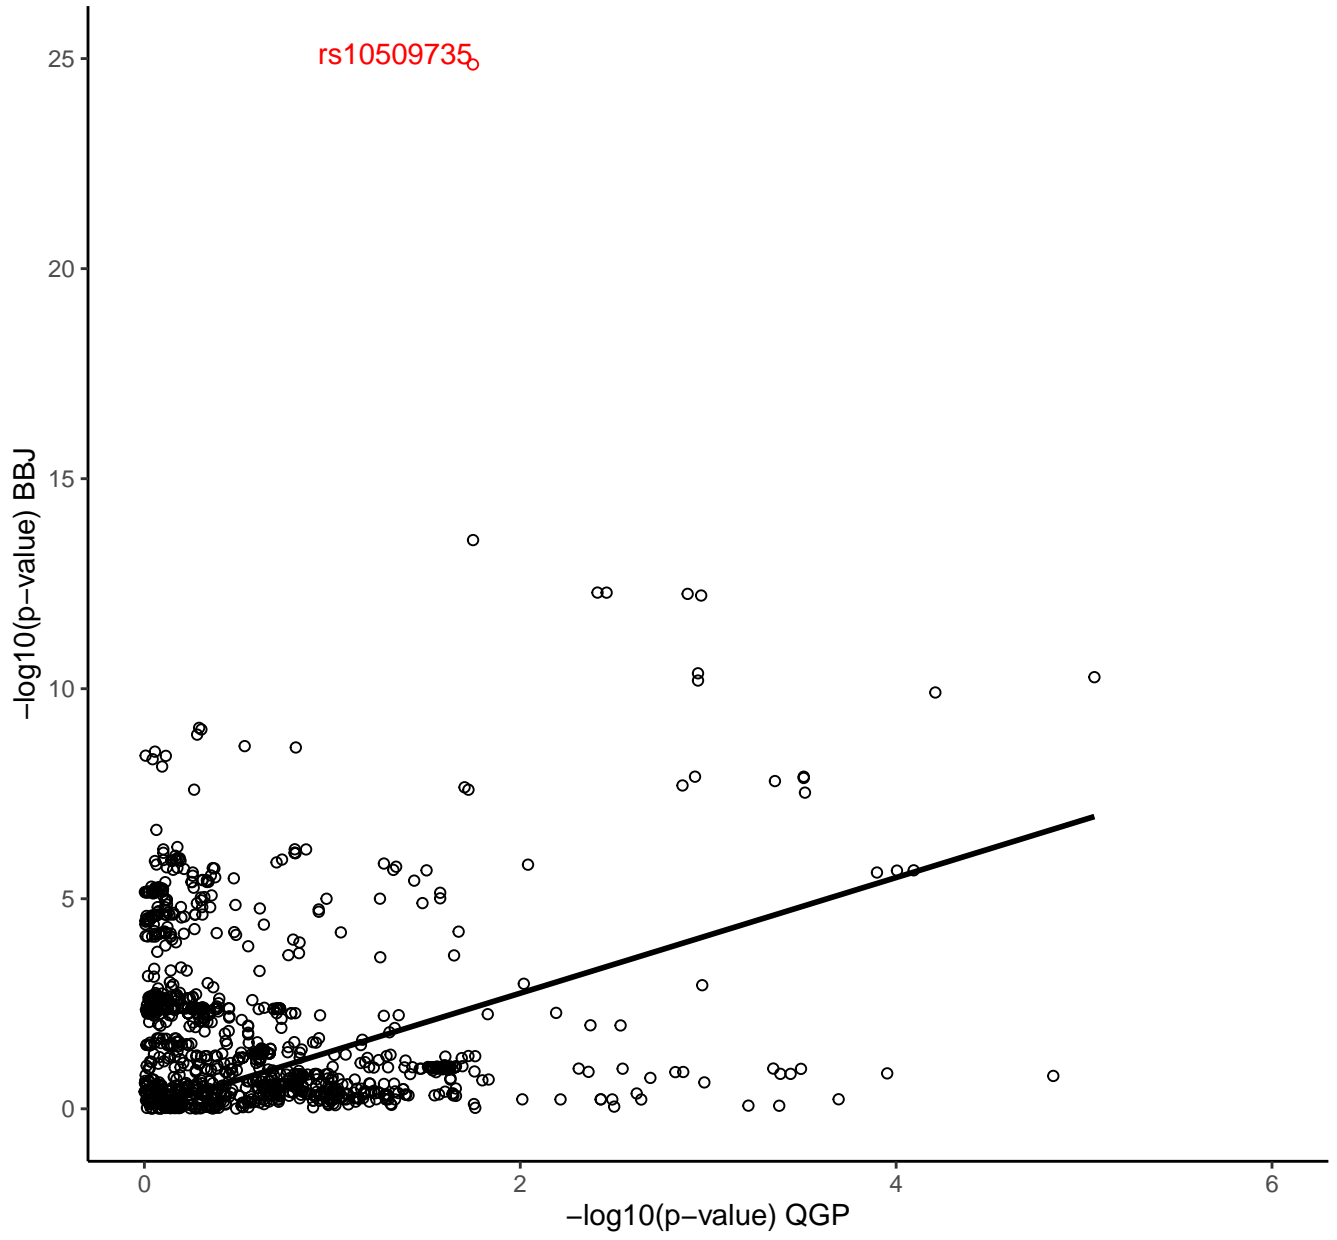

ALP rs2954021

nSNPs = 1596; H2: 0.785; H3: 0.0646; H4: 0.151

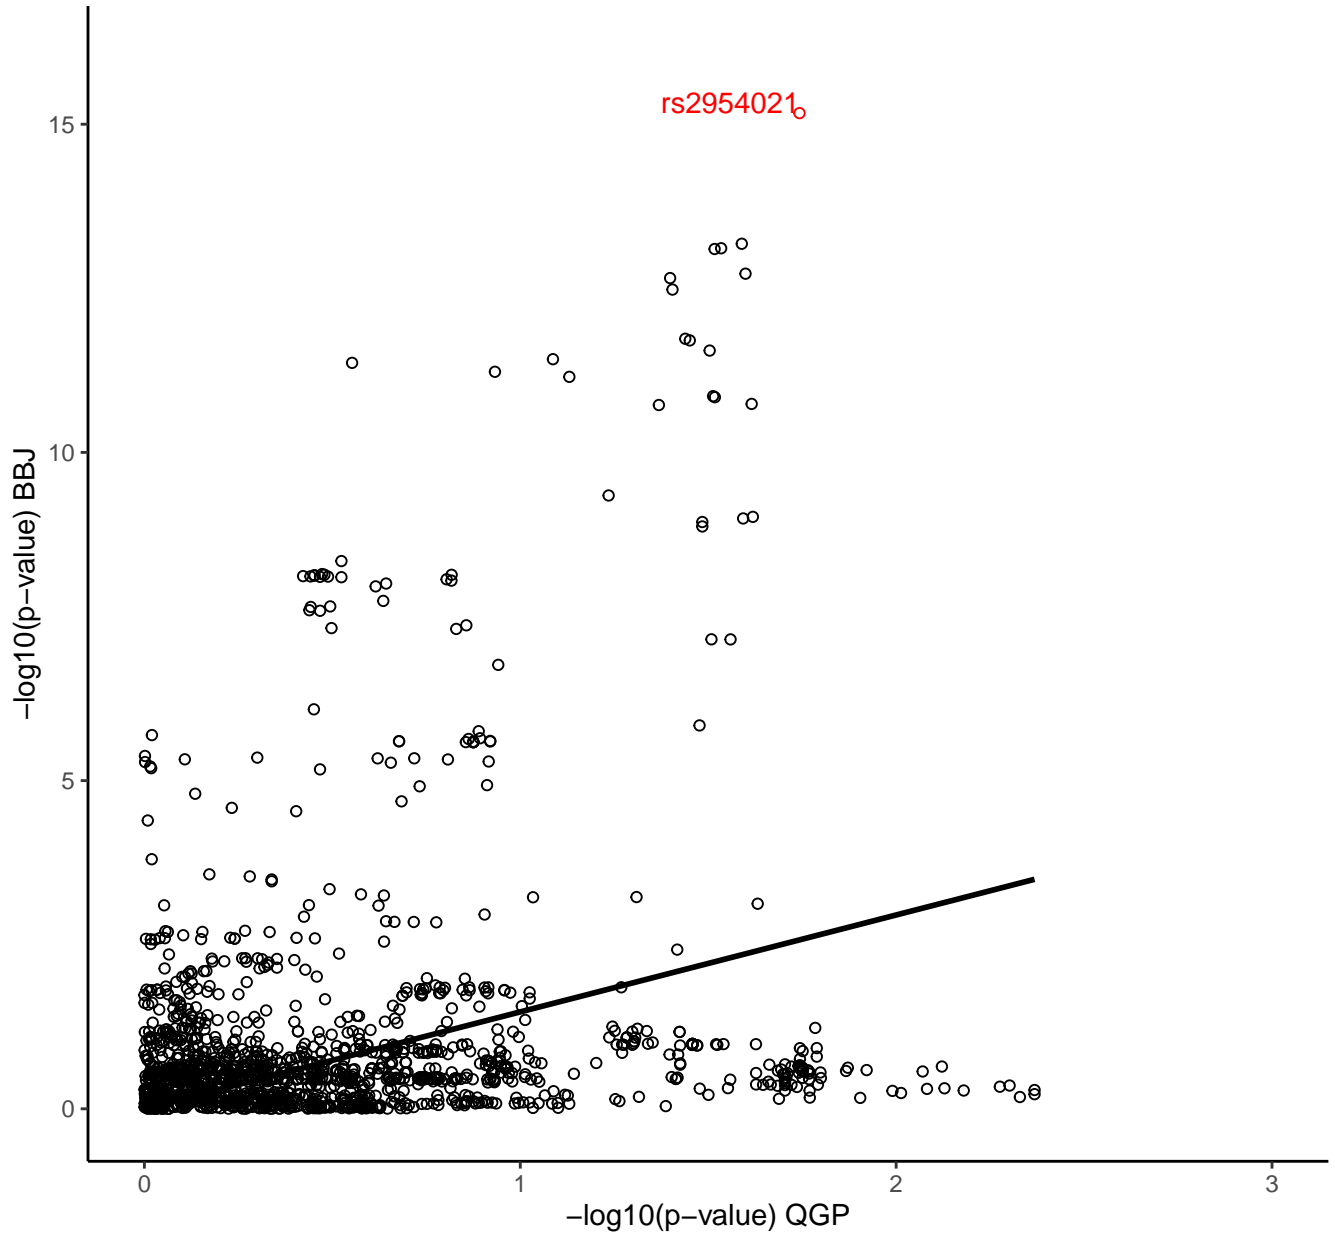



### MCH rs628751

nSNPs = 1597; H2: 0.66; H3: 0.048; H4: 0.292

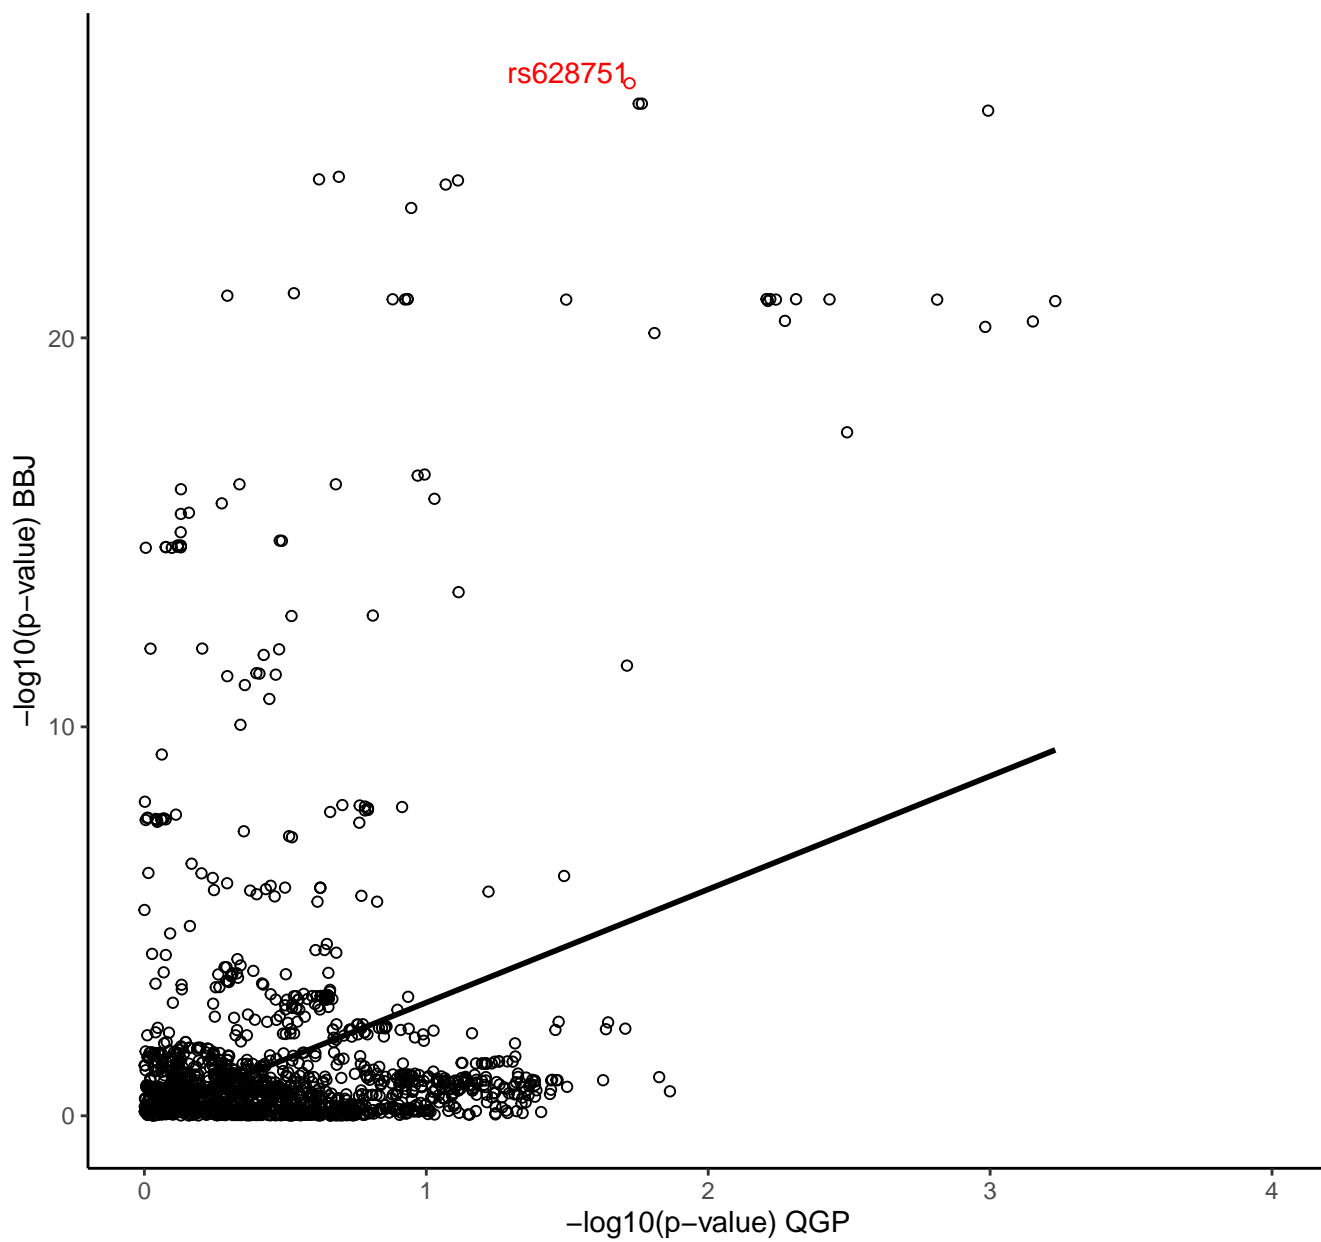

### GGT rs4835265

nSNPs = 1556; H2: 0.745; H3: 0.0877; H4: 0.168

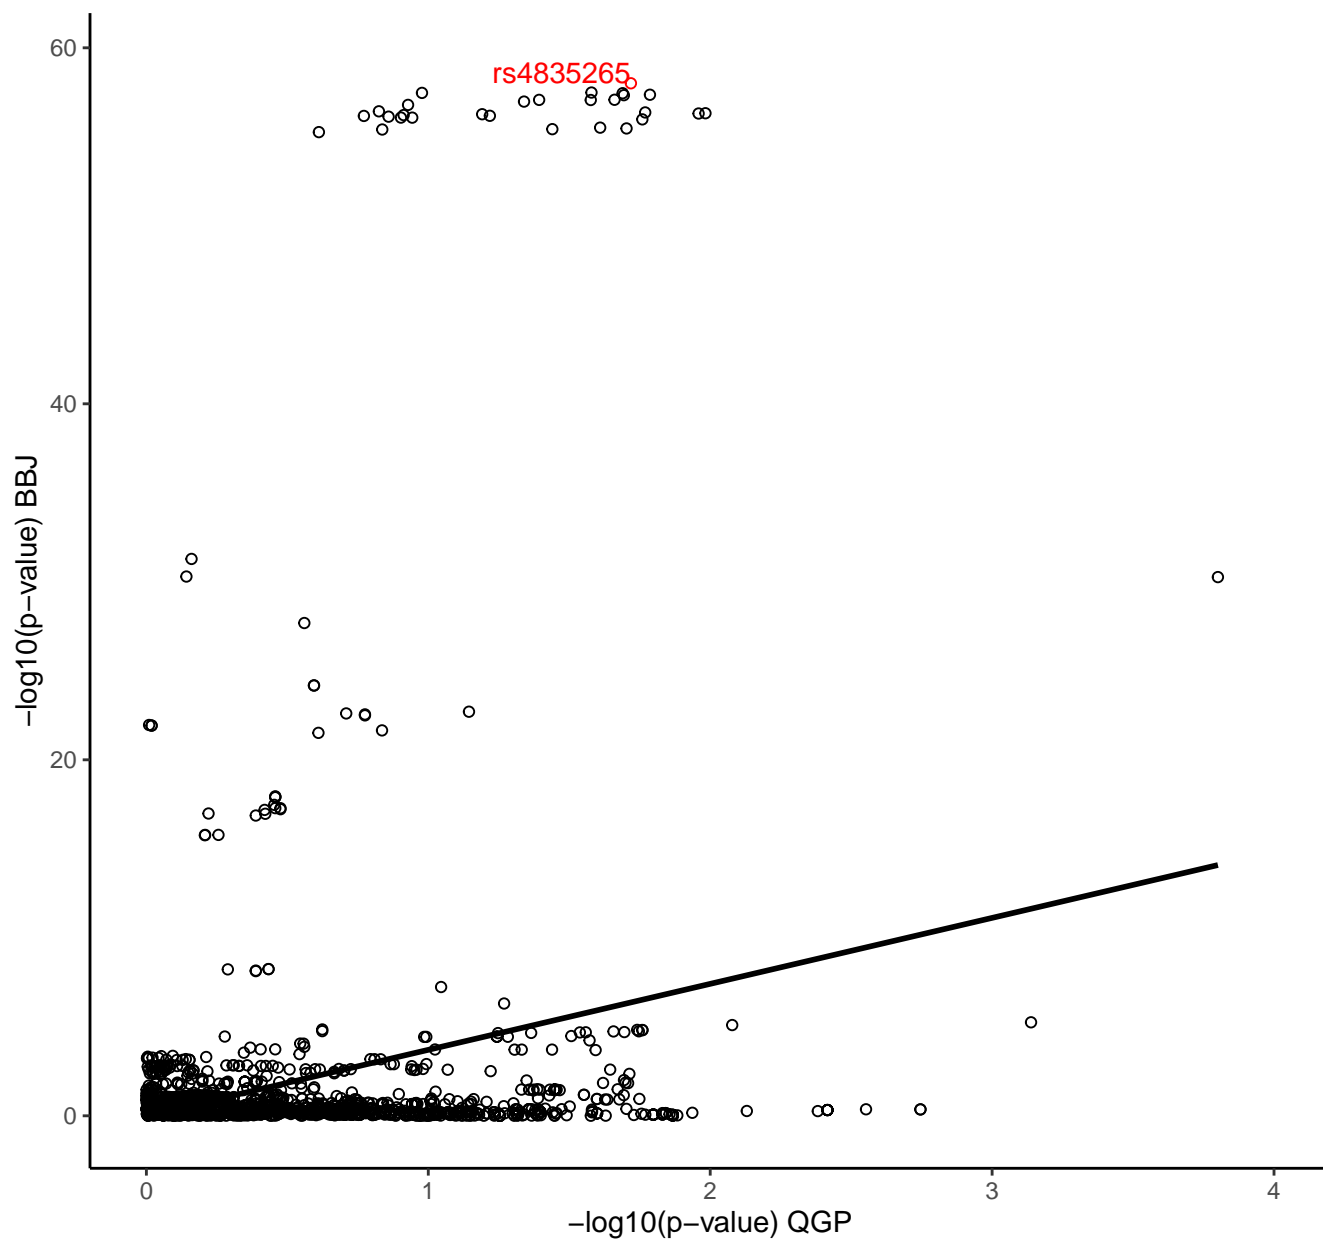

TC rs1260326

nSNPs = 708; H2: 0.921; H3: 0.0158; H4: 0.0634

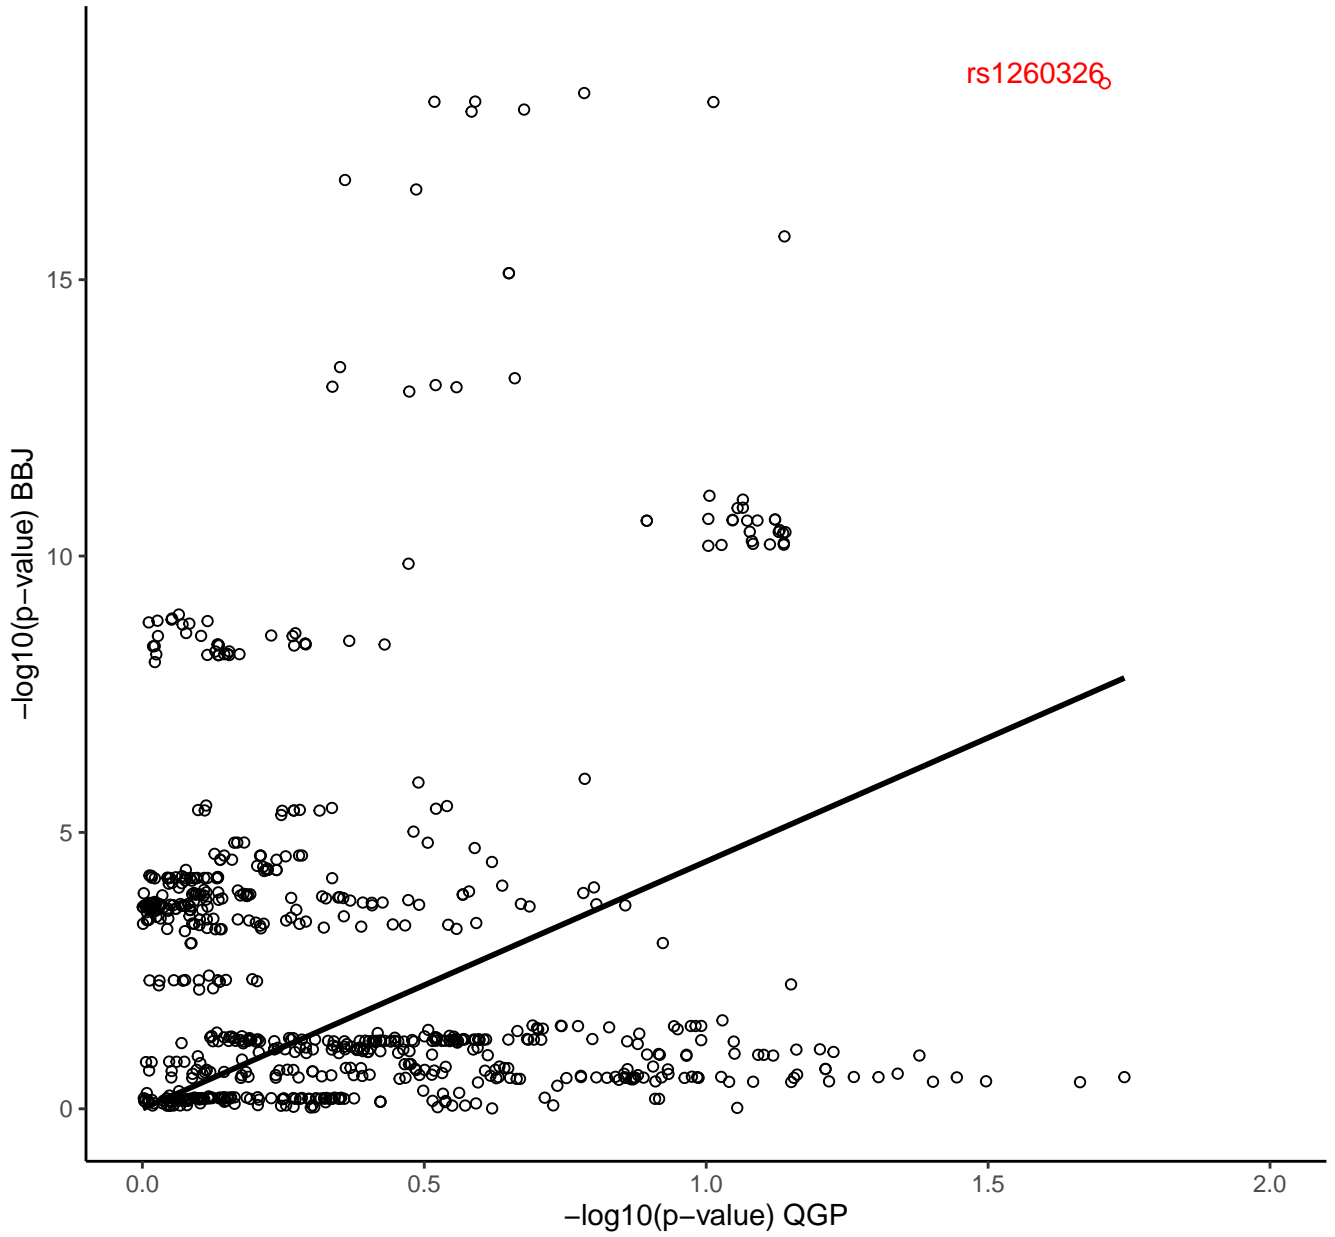

MCV rs34165383

nSNPs = 1804; H2: 0.793; H3: 0.121; H4: 0.0862

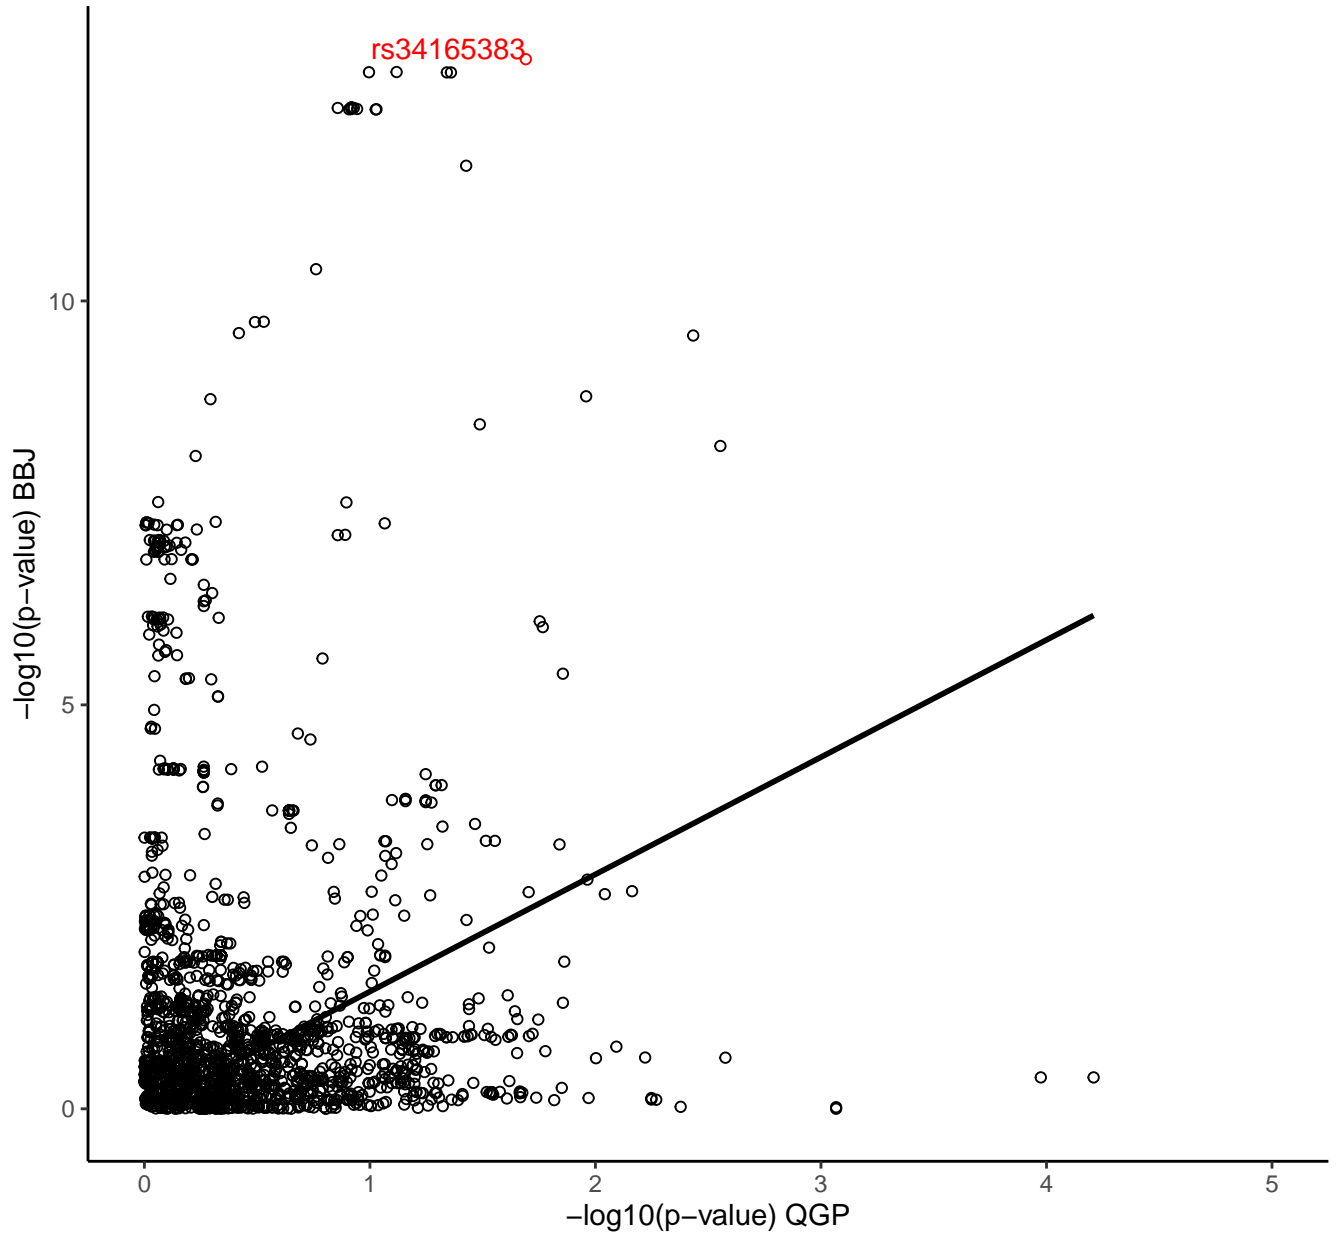

RBC rs13191948

nSNPs = 1842; H2: 0.783; H3: 0.0772; H4: 0.14

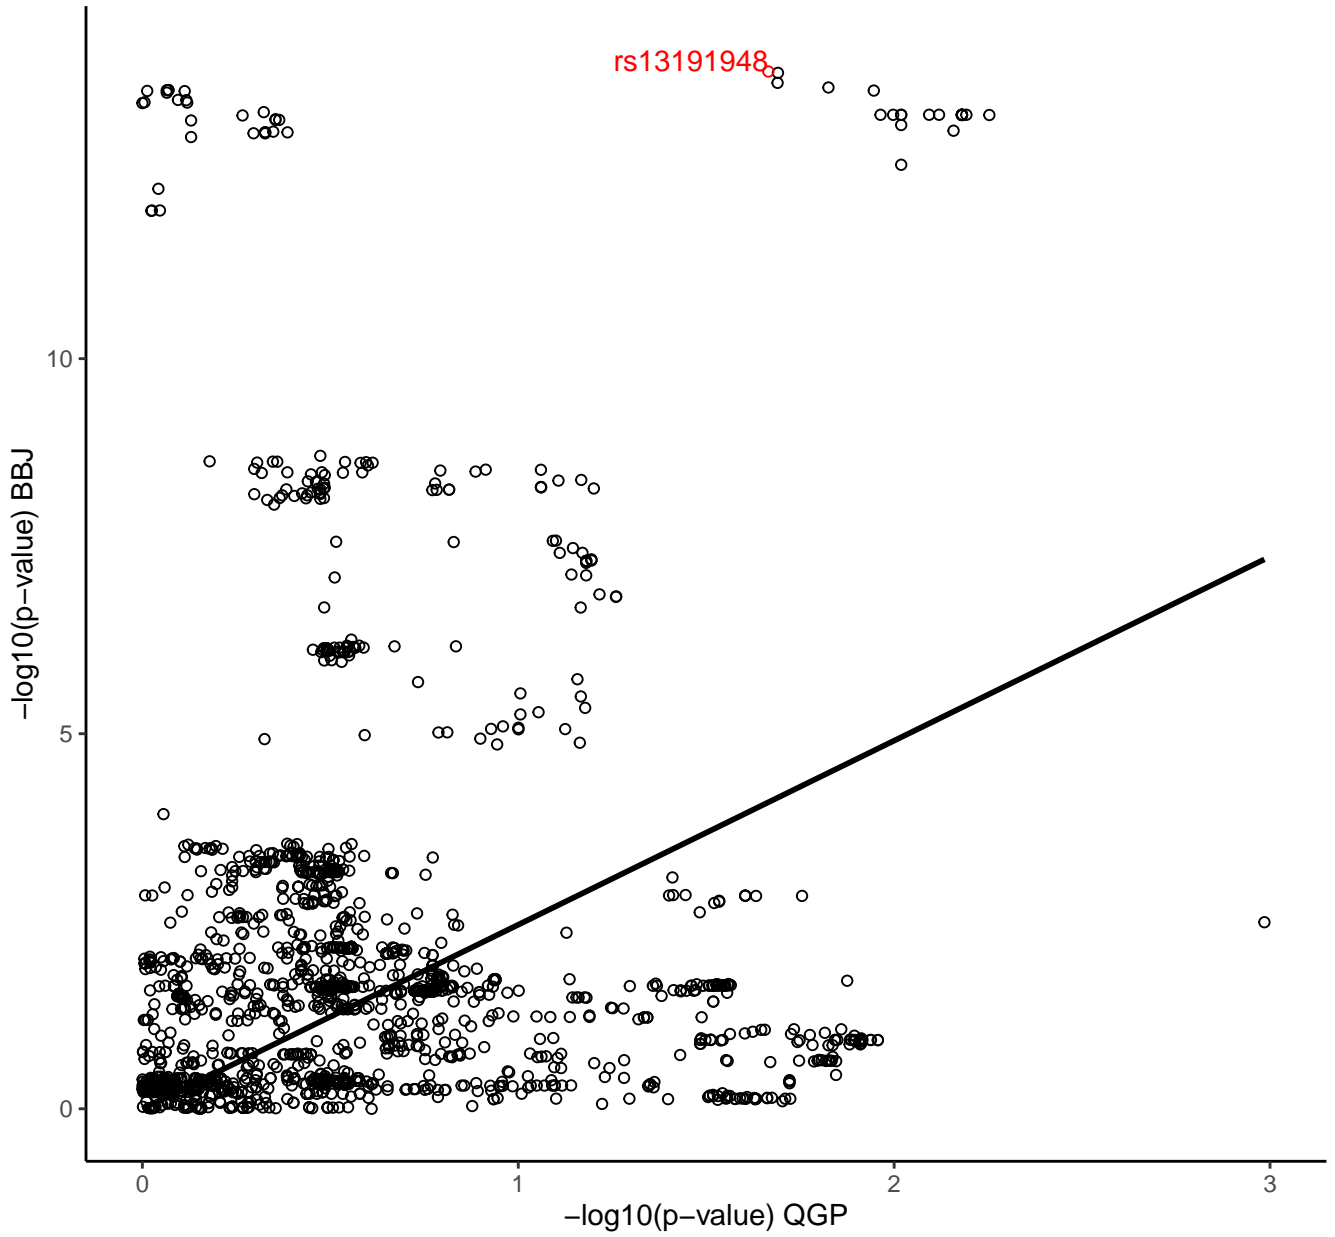

### GGT rs72725097

nSNPs = 1728; H2: 0.856; H3: 0.0885; H4: 0.0518

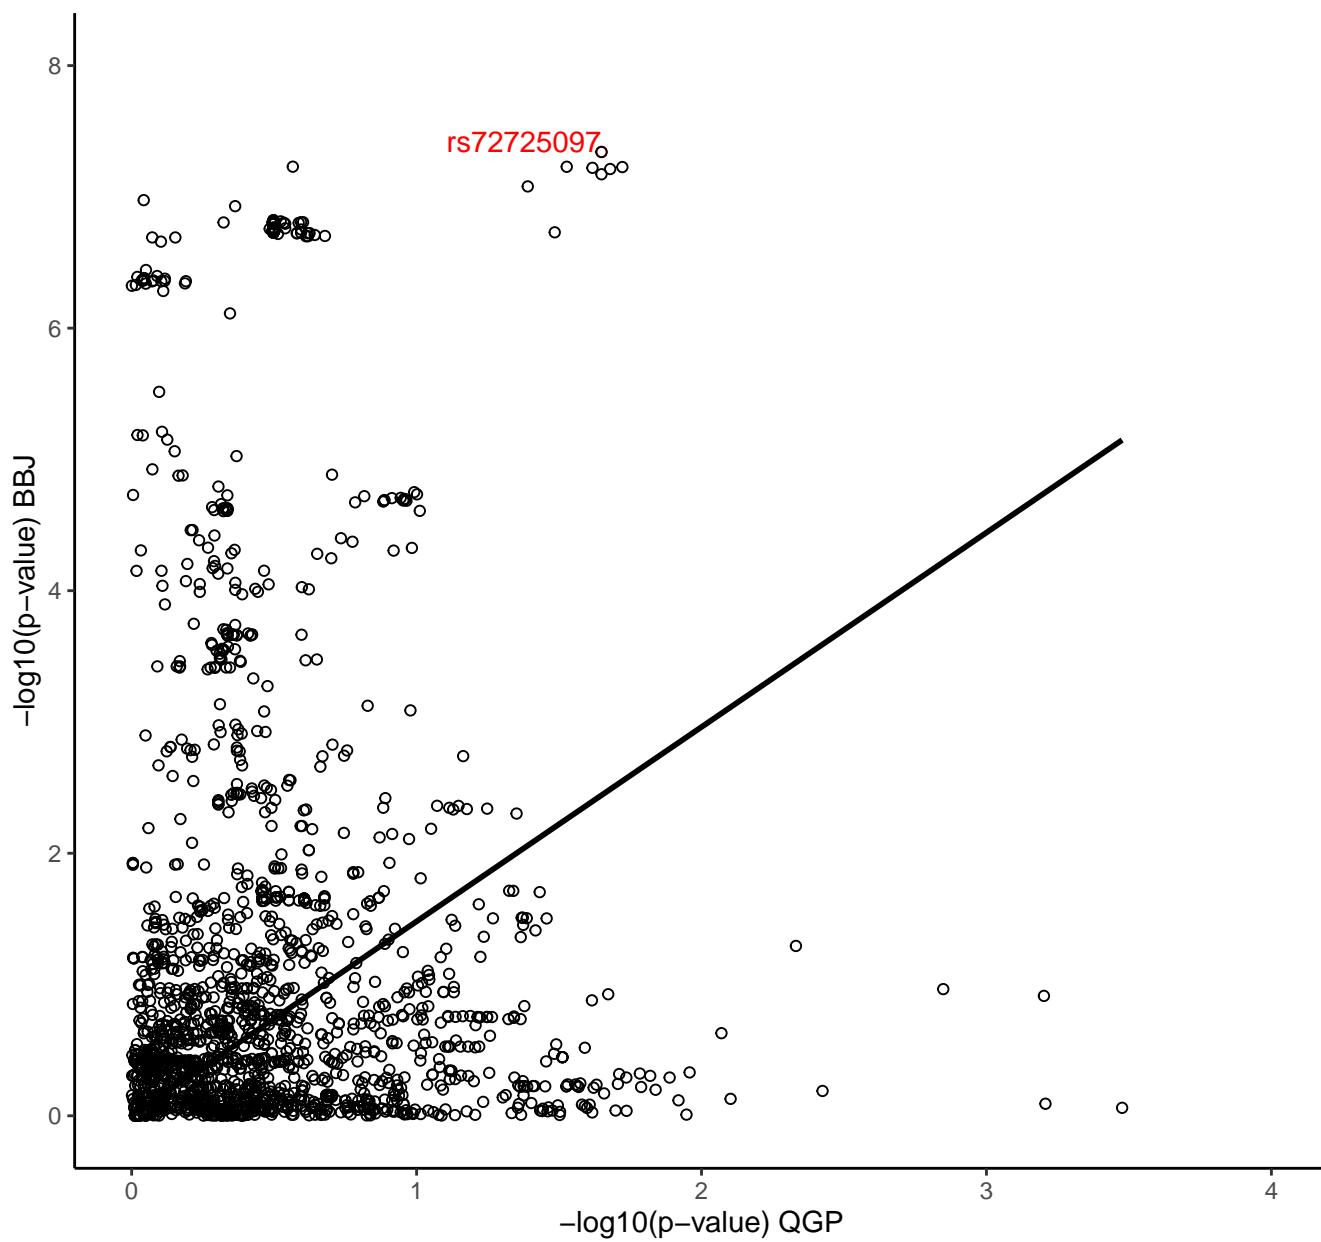

WBC rs1260326

nSNPs = 708; H2: 0.863; H3: 0.0542; H4: 0.0805

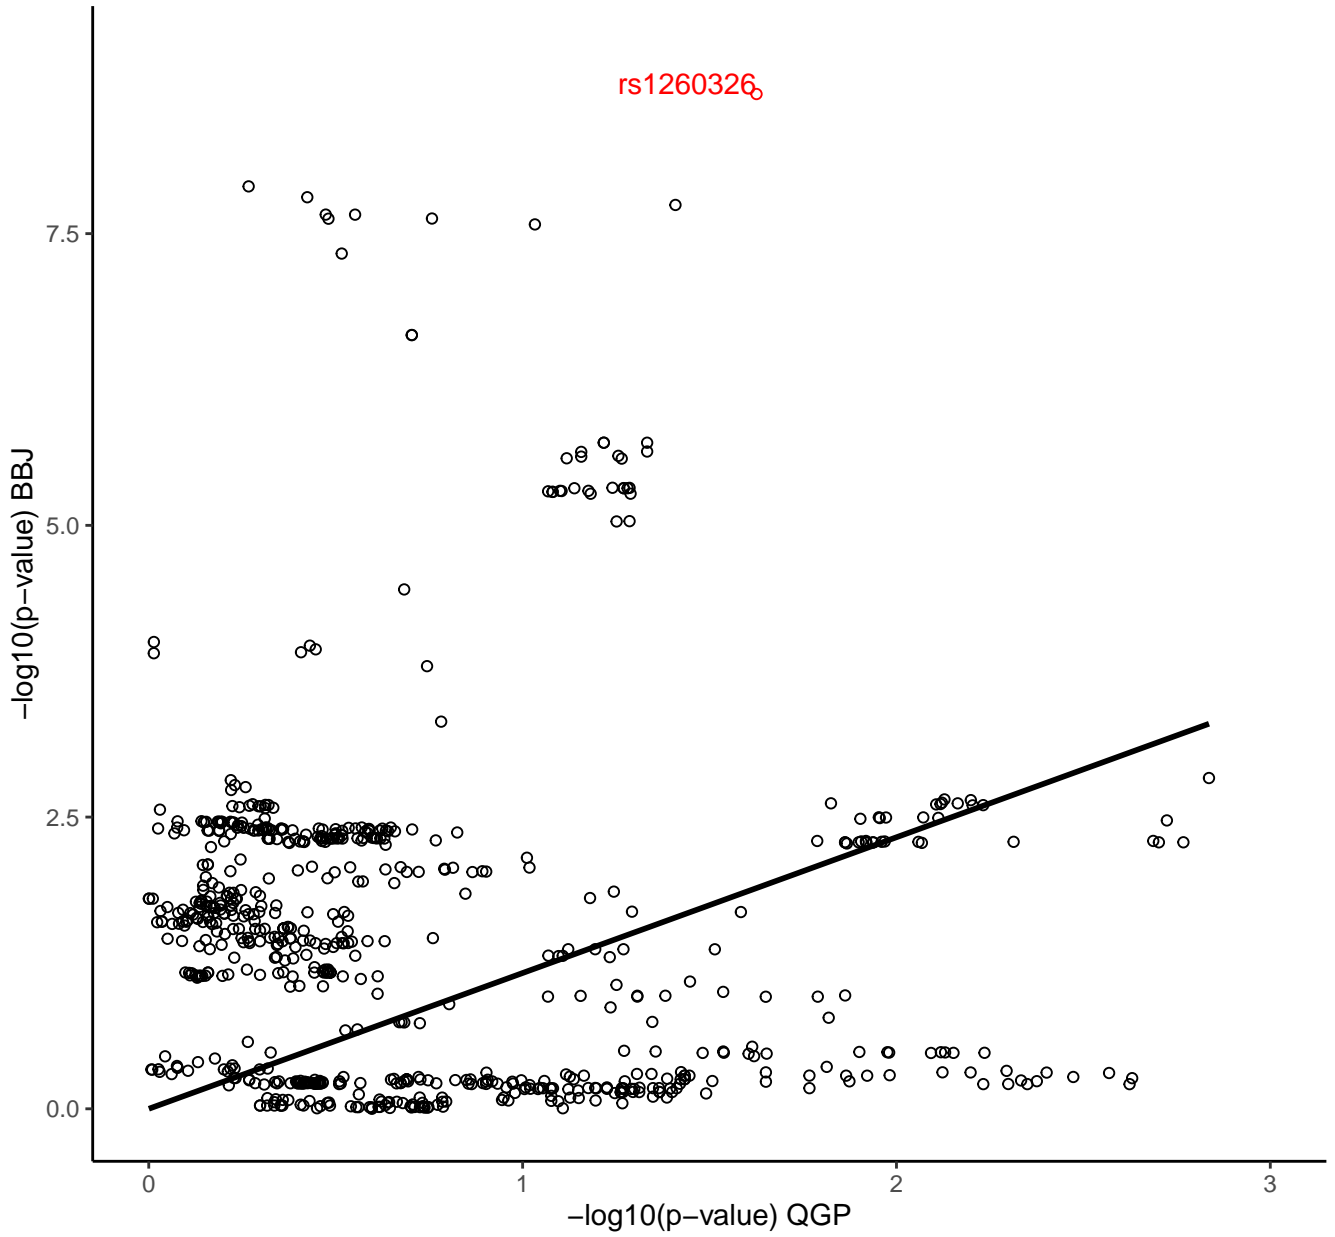

Ht rs833805

nSNPs = 1634; H2: 0.775; H3: 0.0493; H4: 0.175

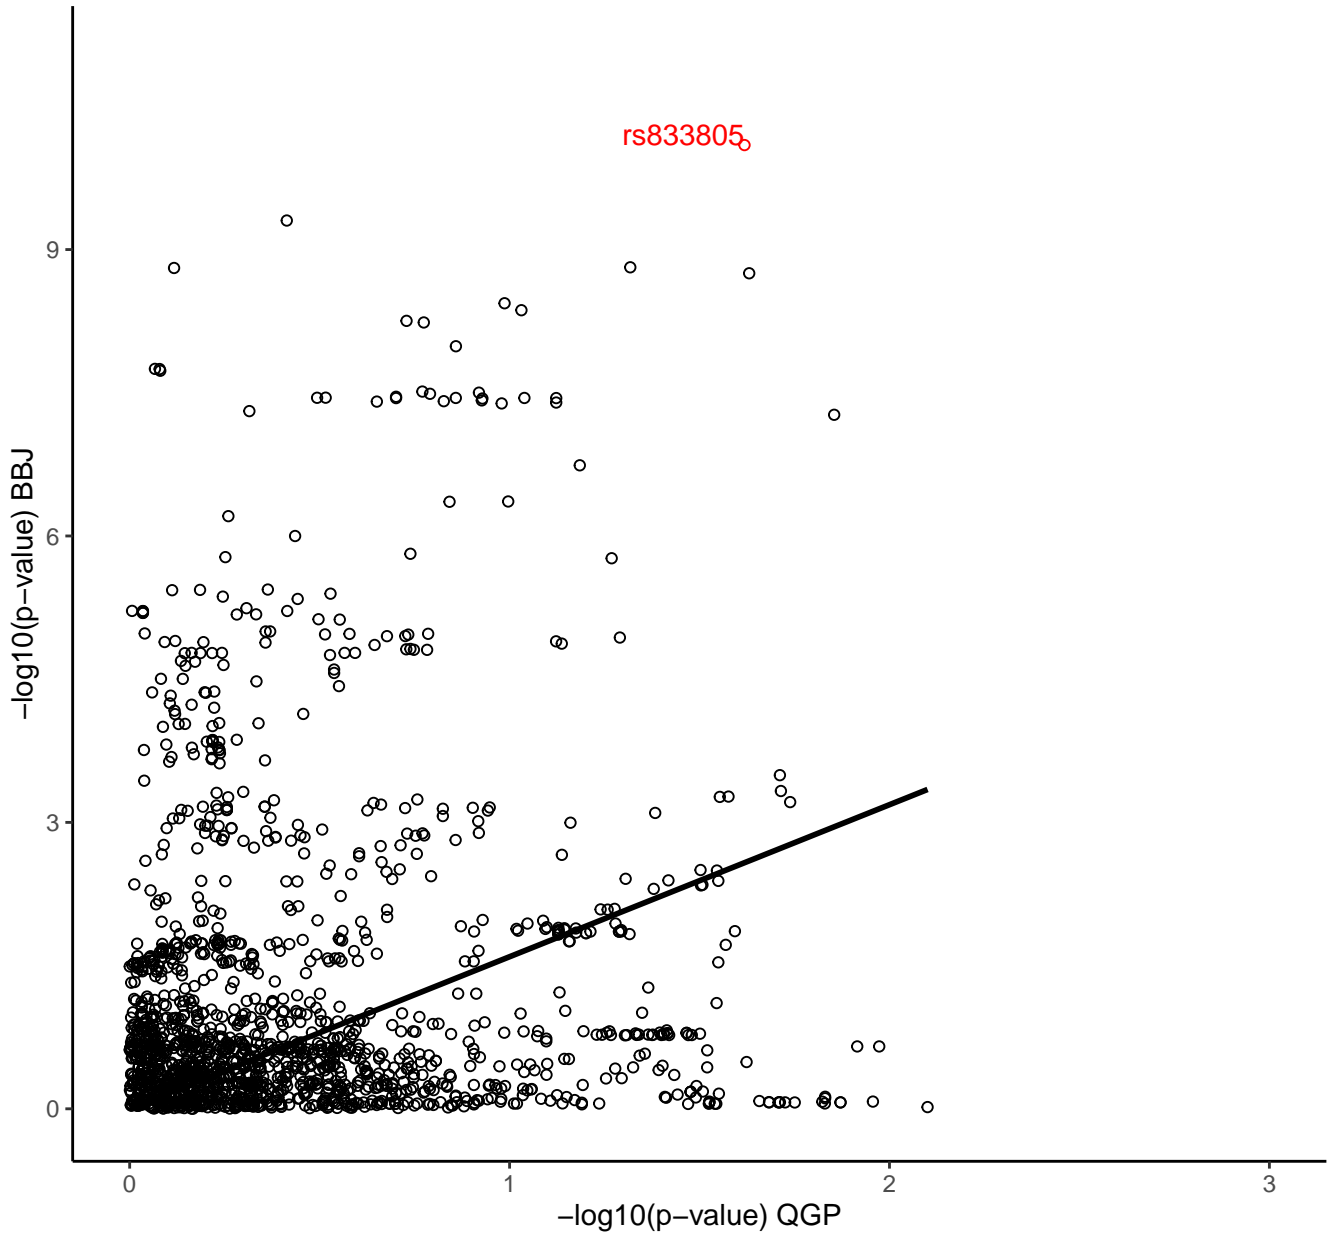



Plt rs7221322

nSNPs = 1718; H2: 0.389; H3: 0.399; H4: 0.213

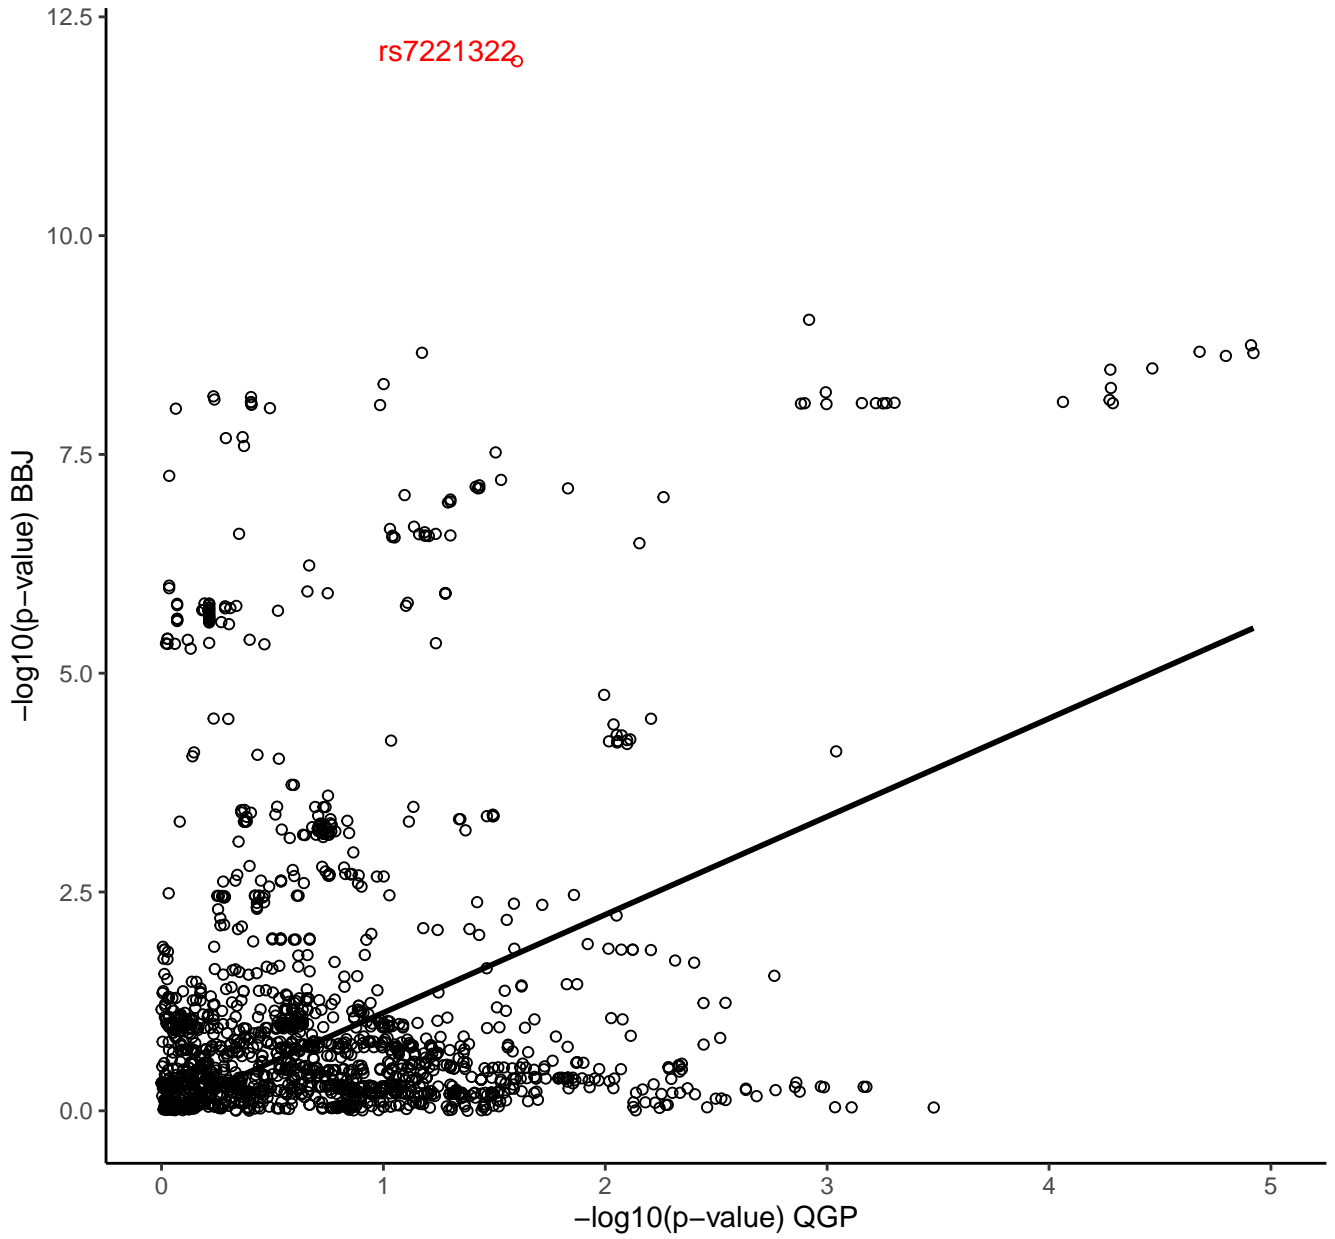

TBil rs28432336

nSNPs = 1043; H2: 0.909; H3: 0.0344; H4: 0.0504

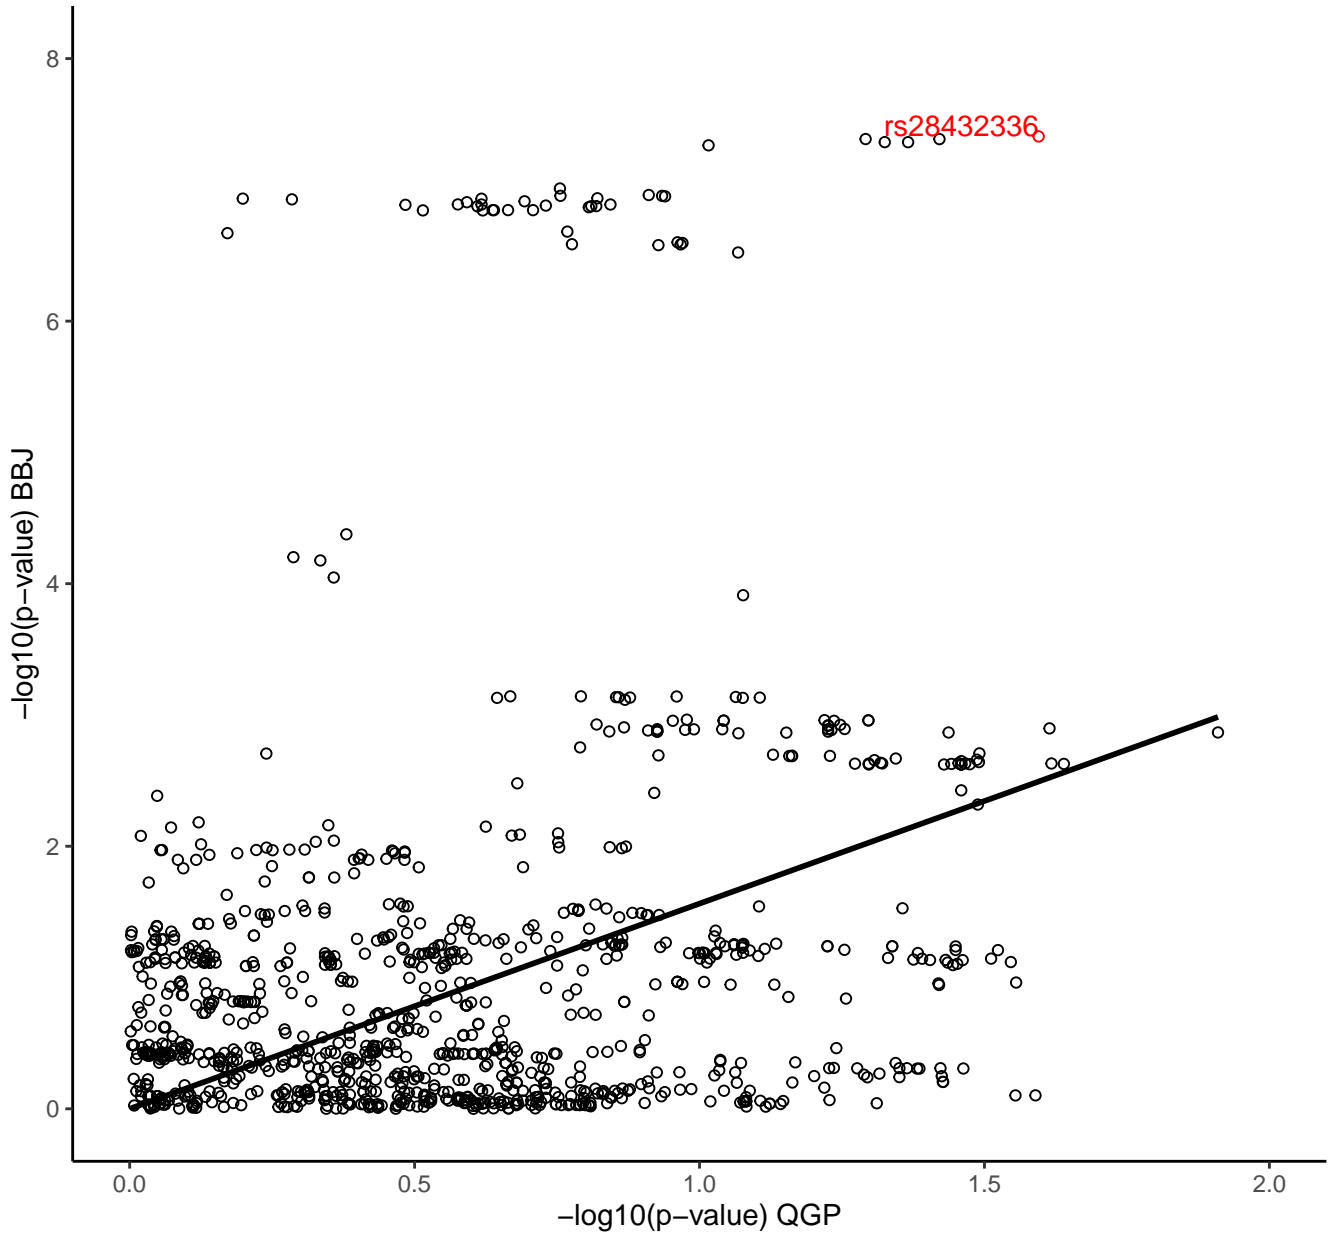

ALT rs73186036

nSNPs = 2024; H2: 0.755; H3: 0.13; H4: 0.114

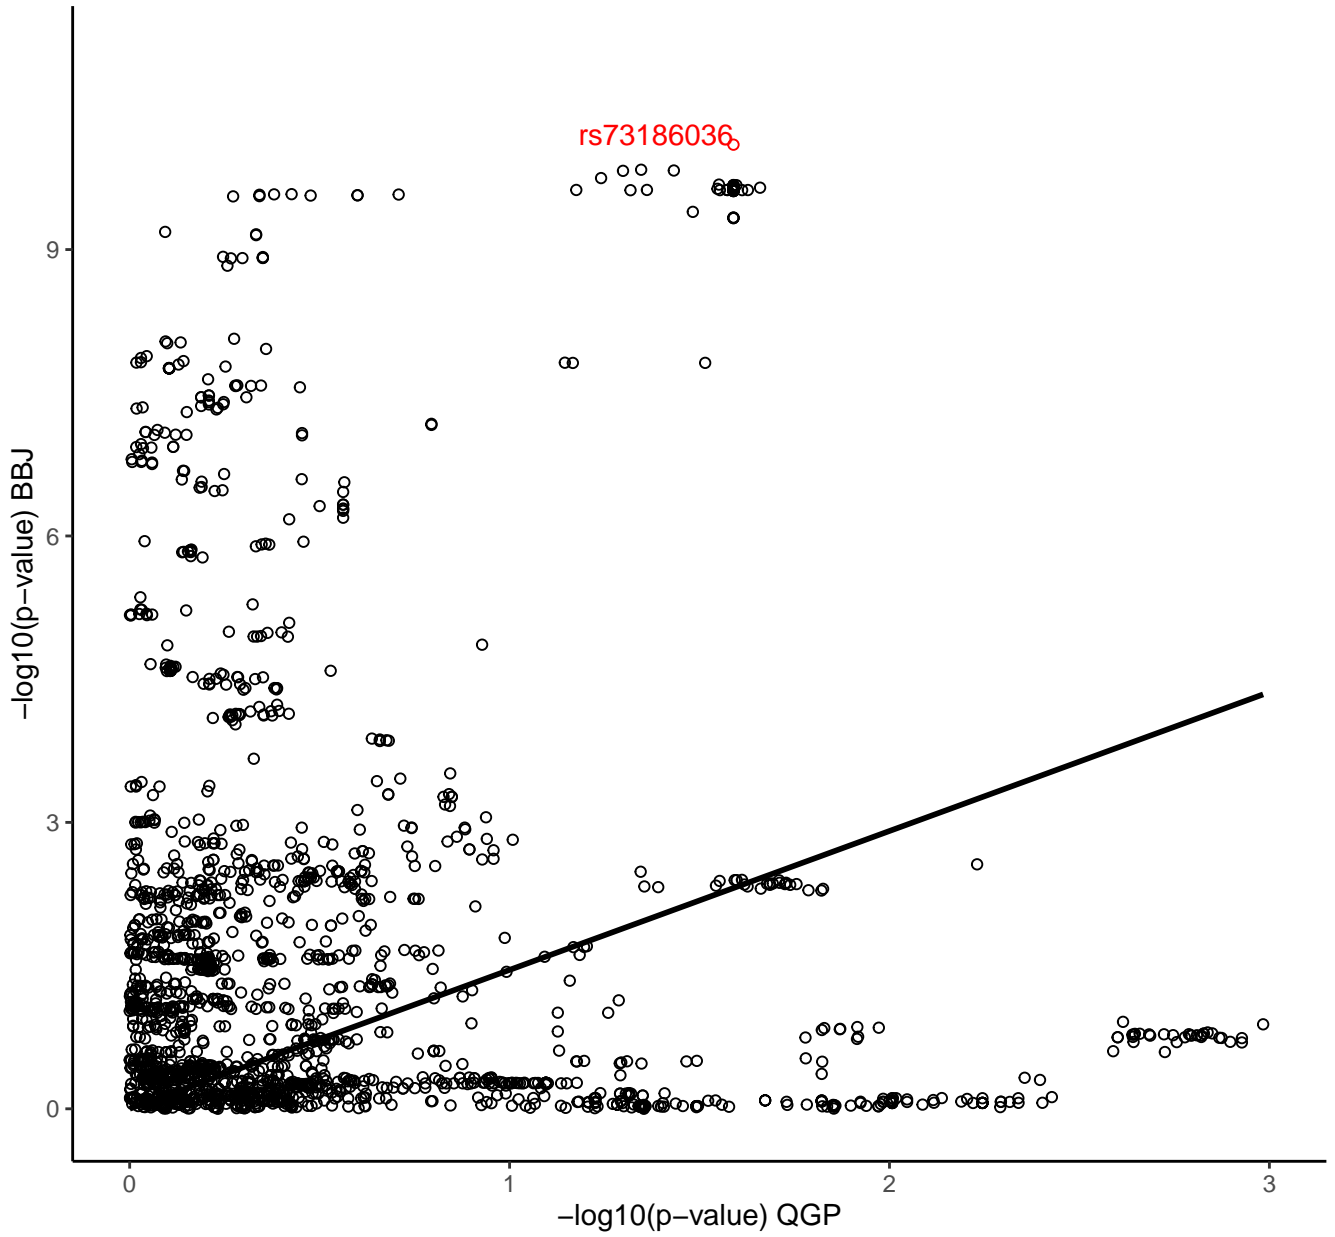

Hb rs833805

nSNPs = 1634; H2: 0.78; H3: 0.0495; H4: 0.166

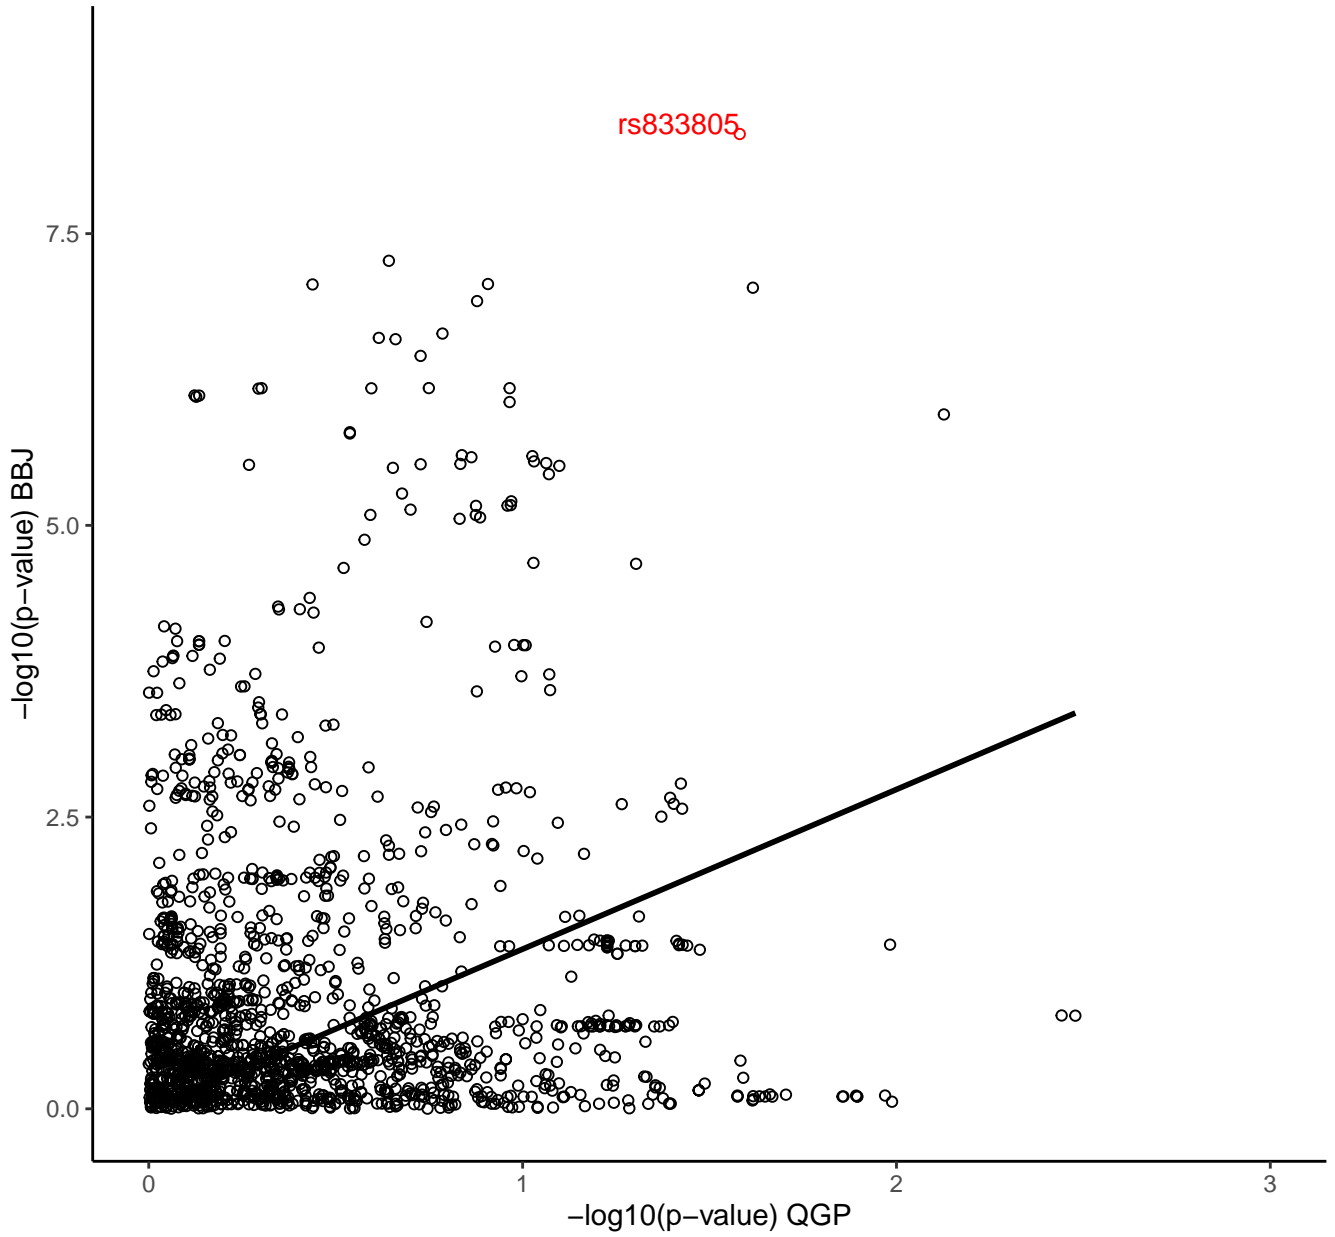

CK rs6501199

nSNPs = 2189; H2: 0.739; H3: 0.173; H4: 0.0877

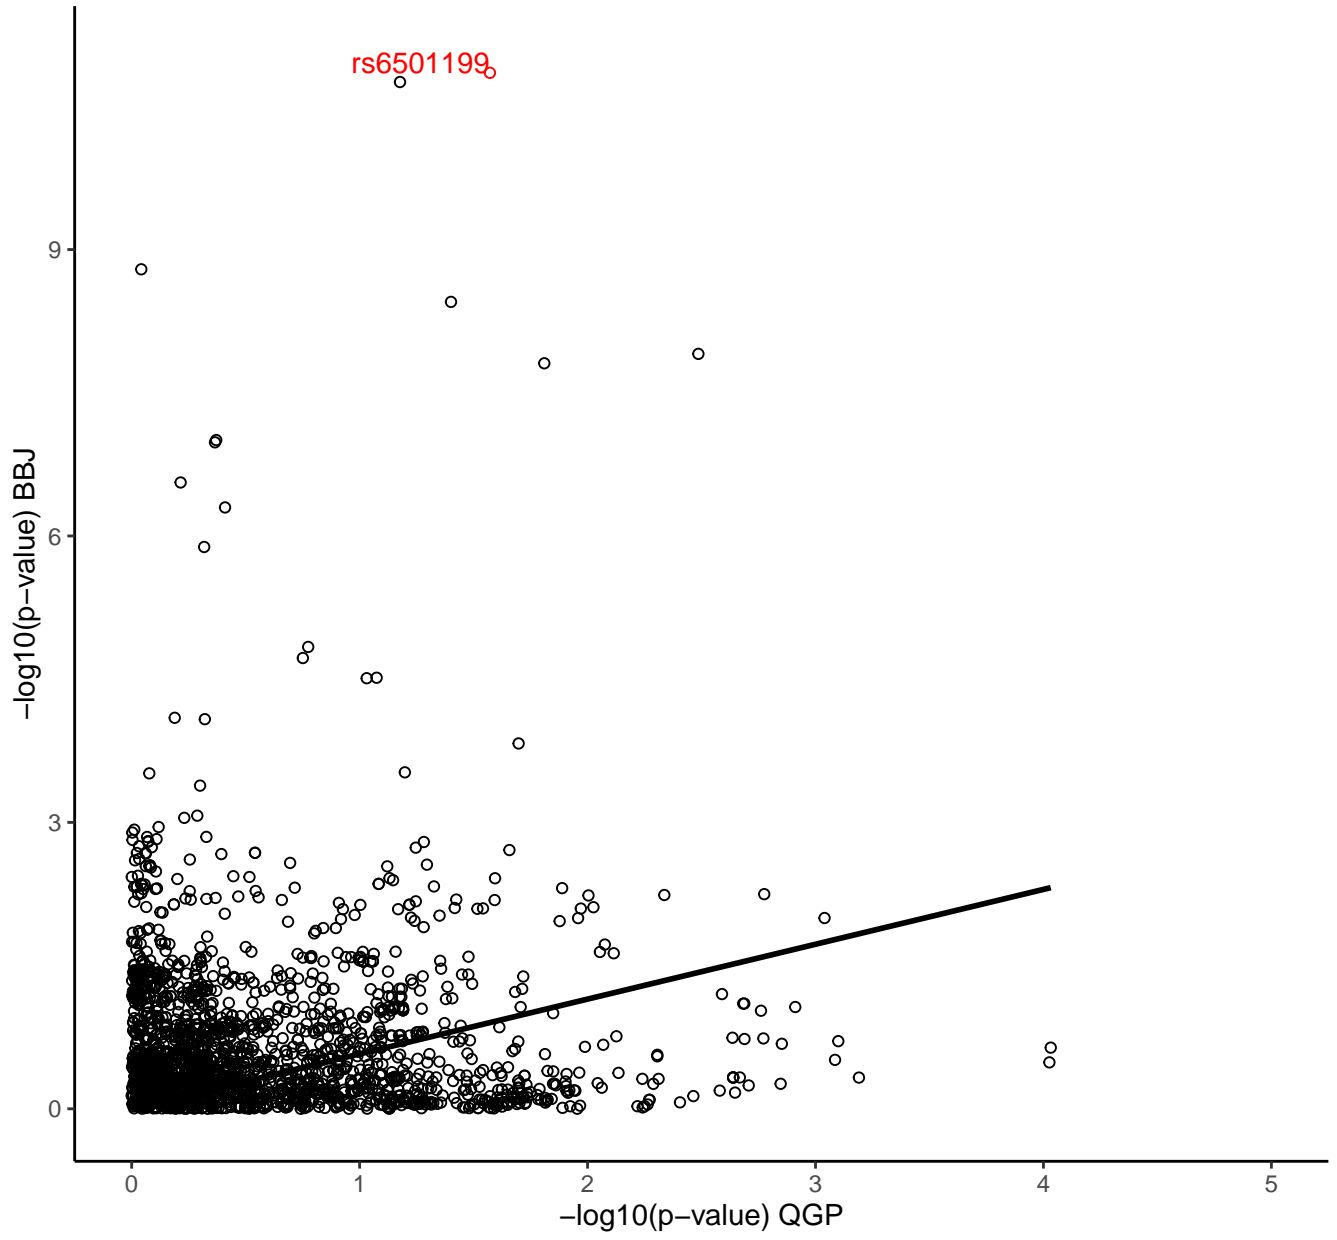

MCH rs35788208

nSNPs = 1802; H2: 0.791; H3: 0.0929; H4: 0.116

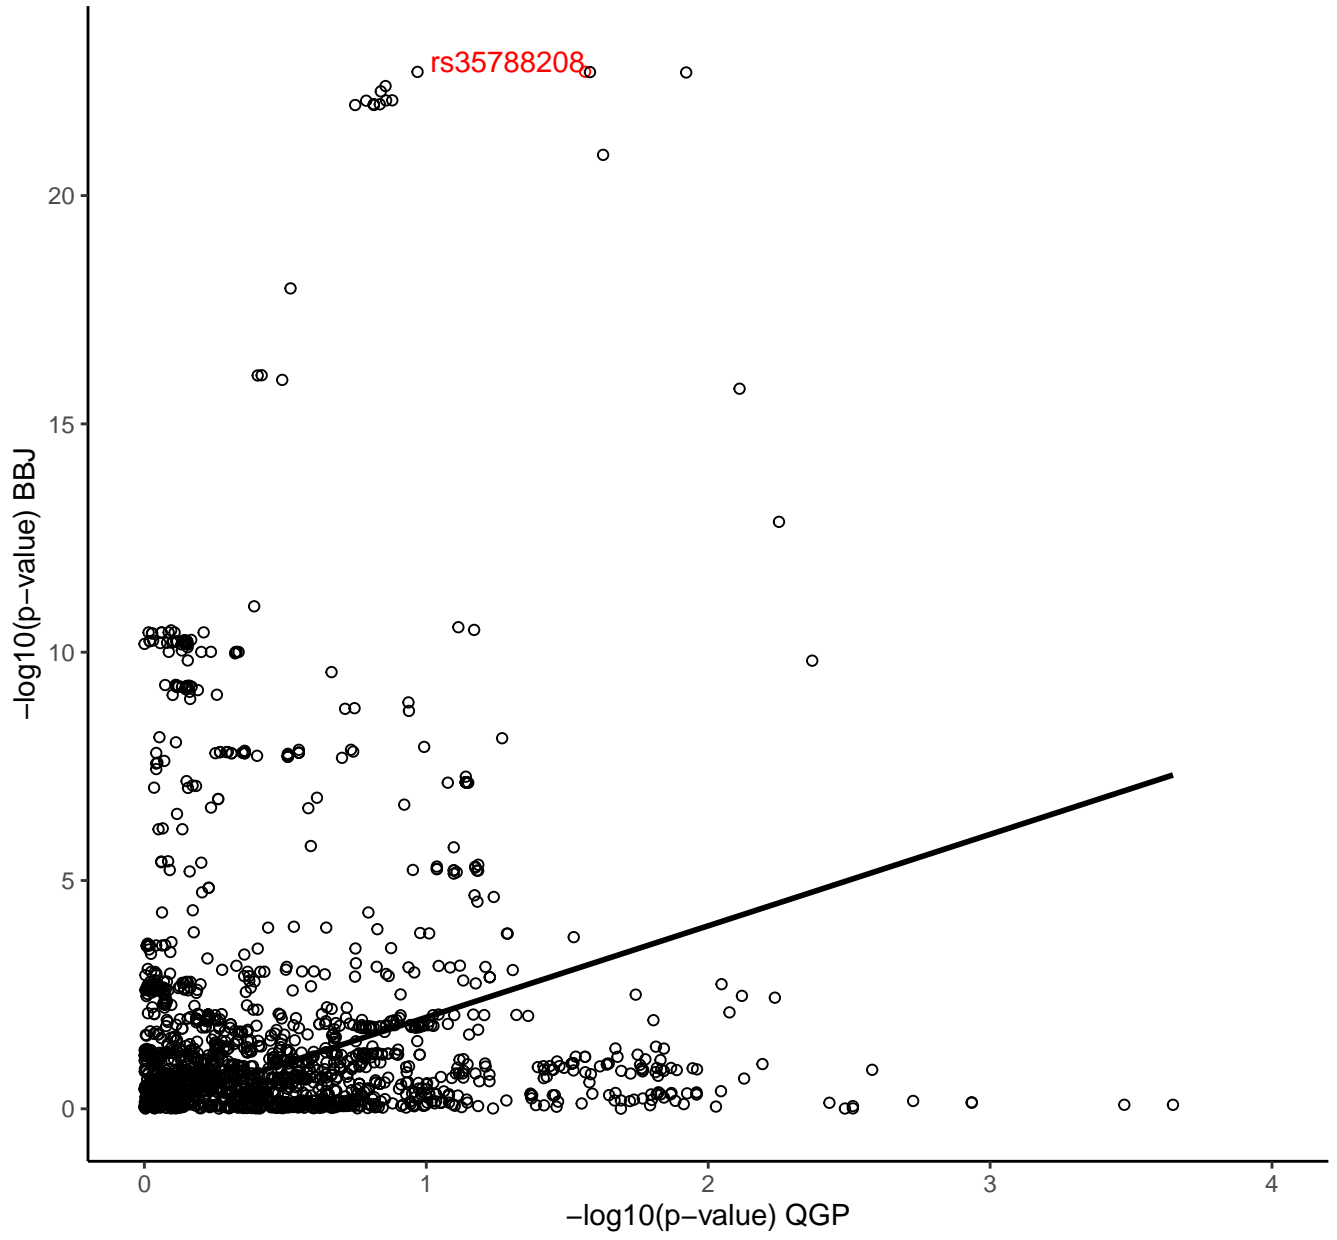

### WBC rs549280

nSNPs = 1502; H2: 0.816; H3: 0.112; H4: 0.0723

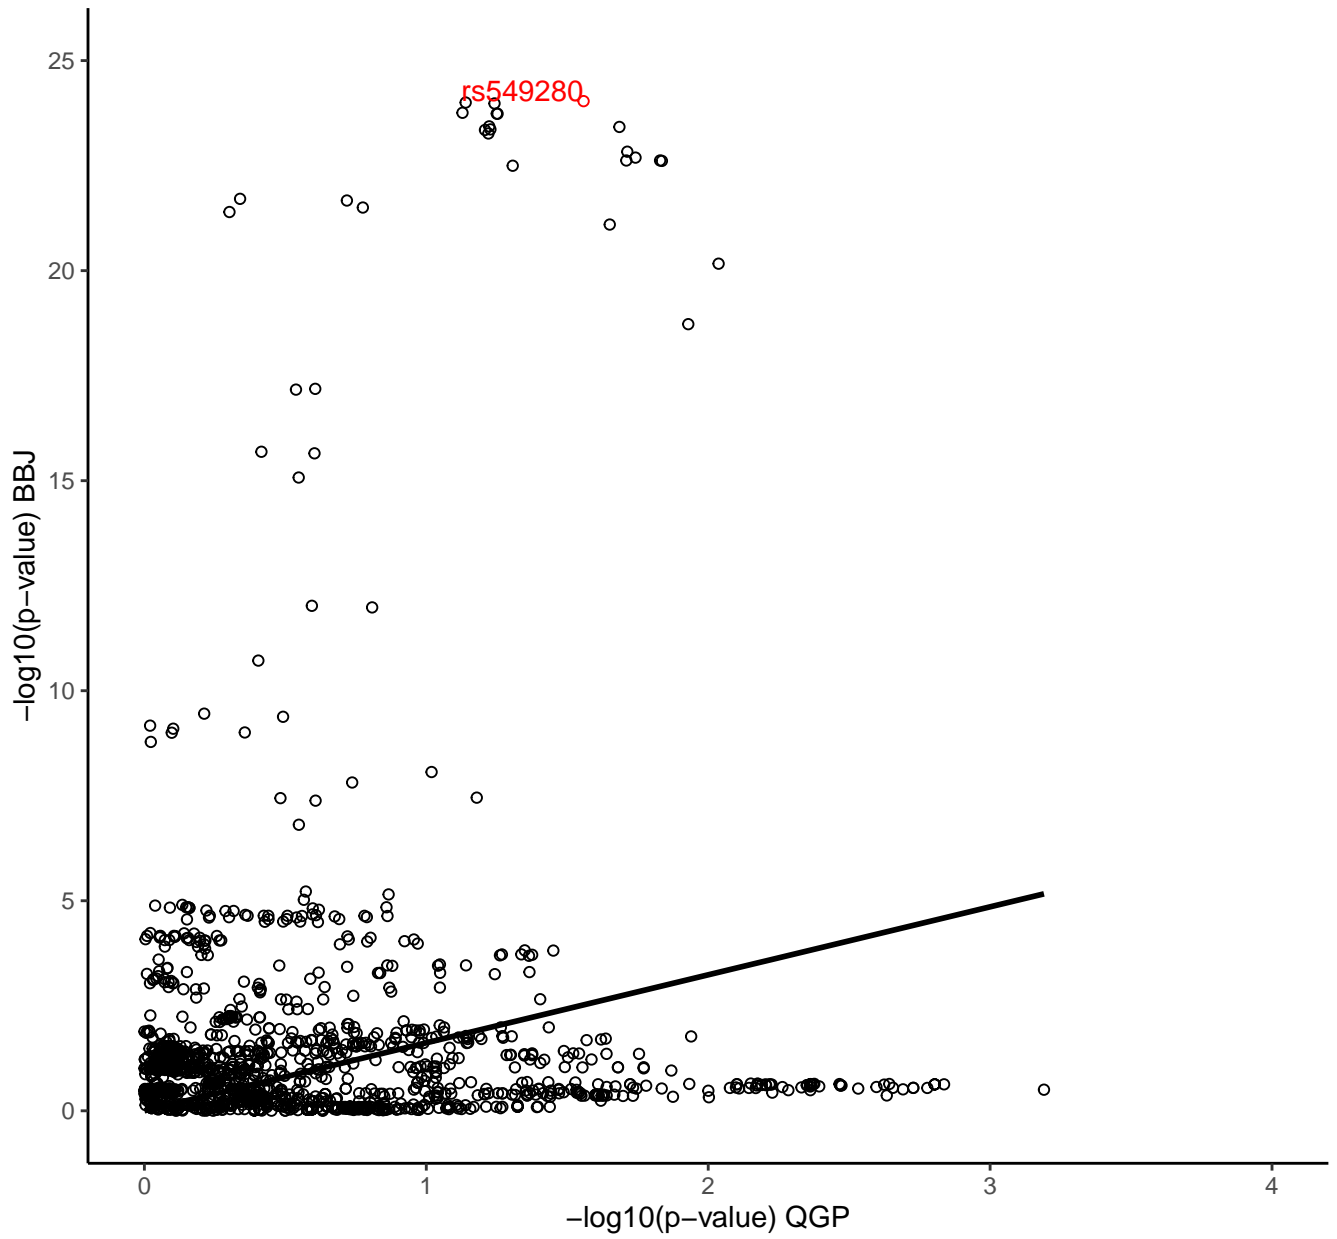

Plt rs1260326

nSNPs = 708; H2: 0.883; H3: 0.0176; H4: 0.0994

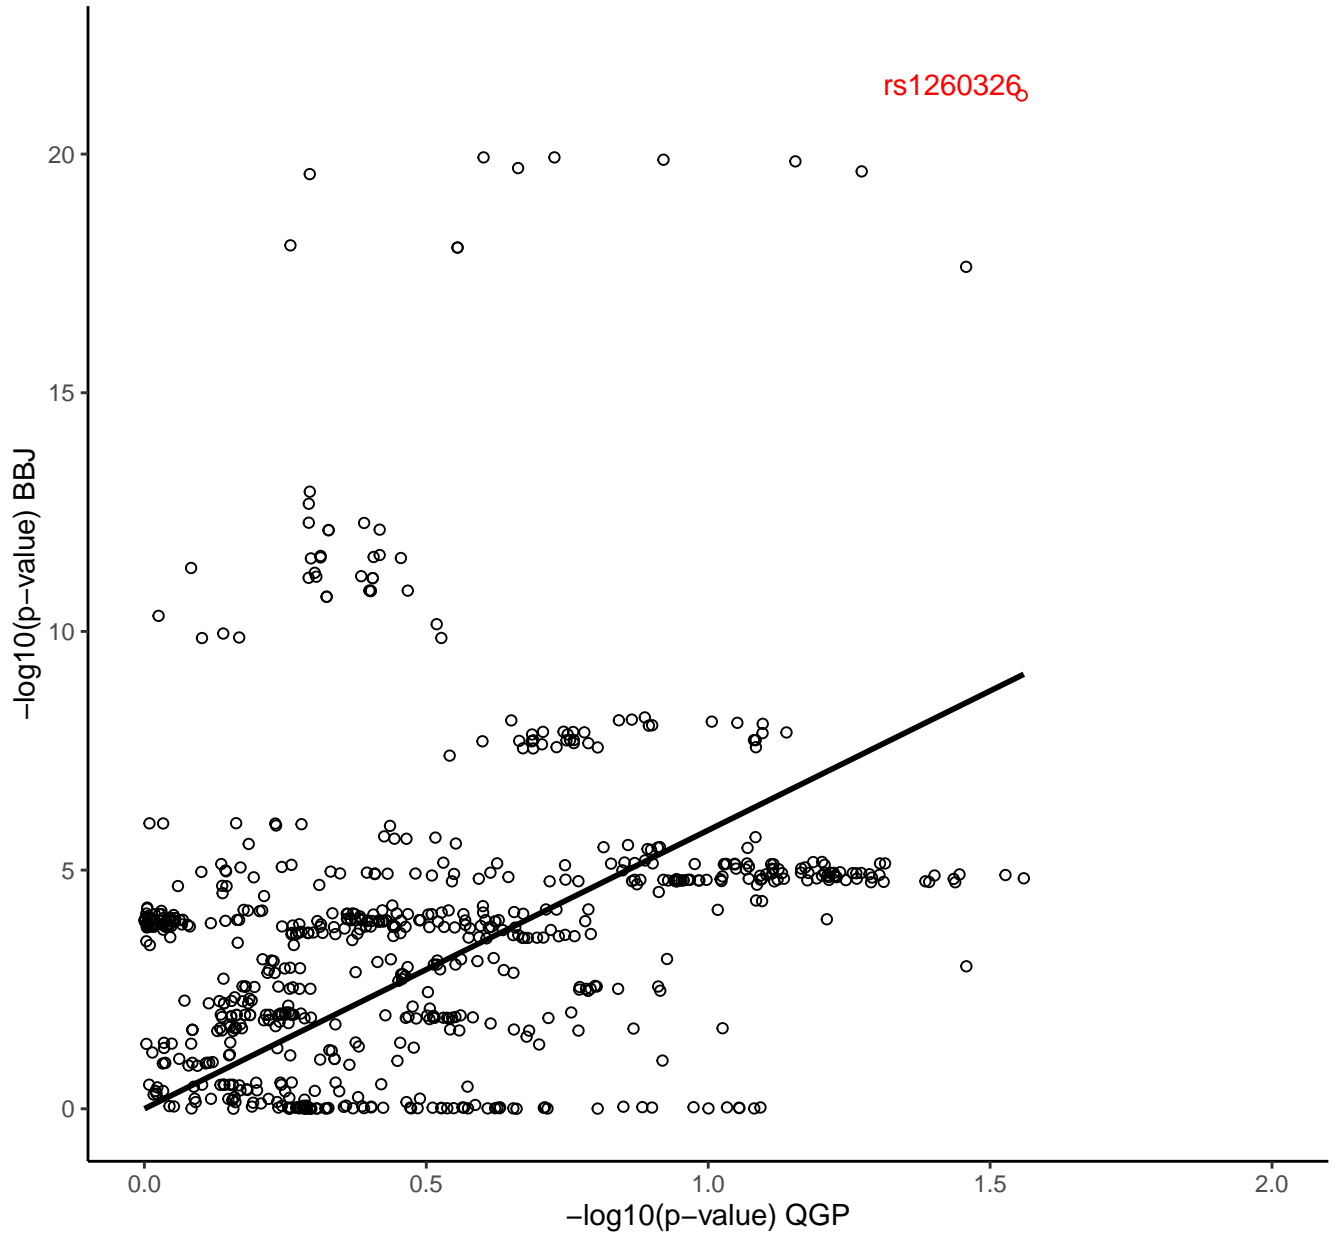



### HDL-C rs7445

nSNPs = 965; H2: 0.857; H3: 0.0448; H4: 0.0977

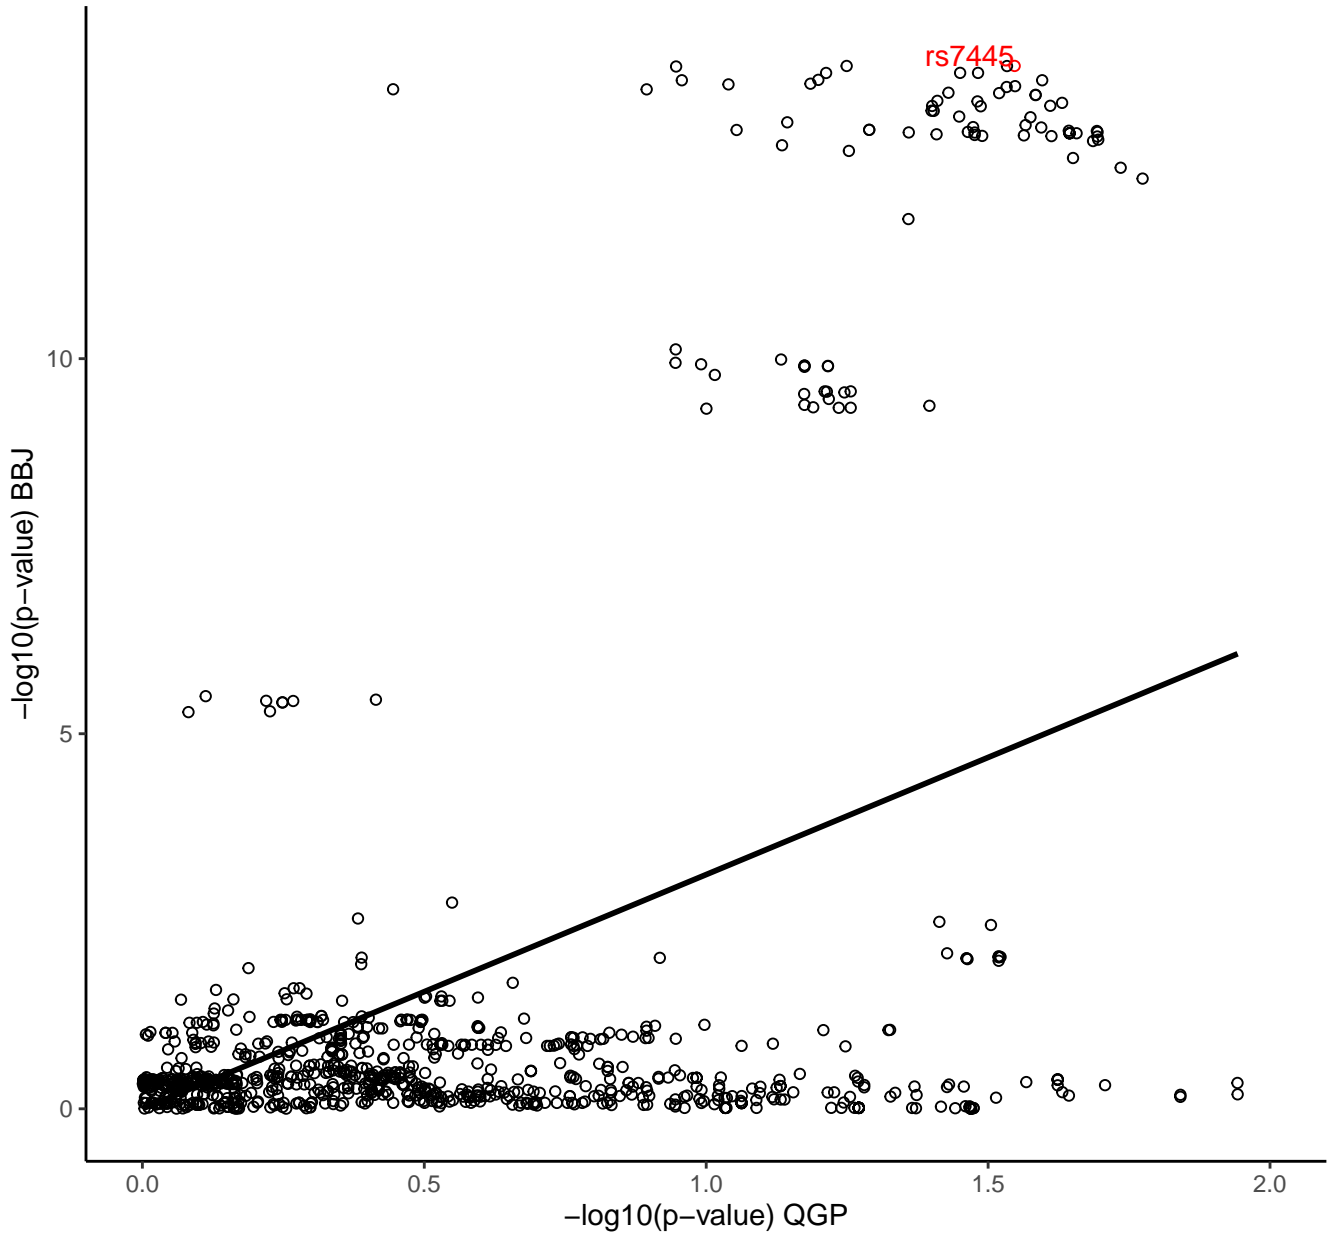

sCr rs7247977

nSNPs = 2037; H2: 0.715; H3: 0.118; H4: 0.163

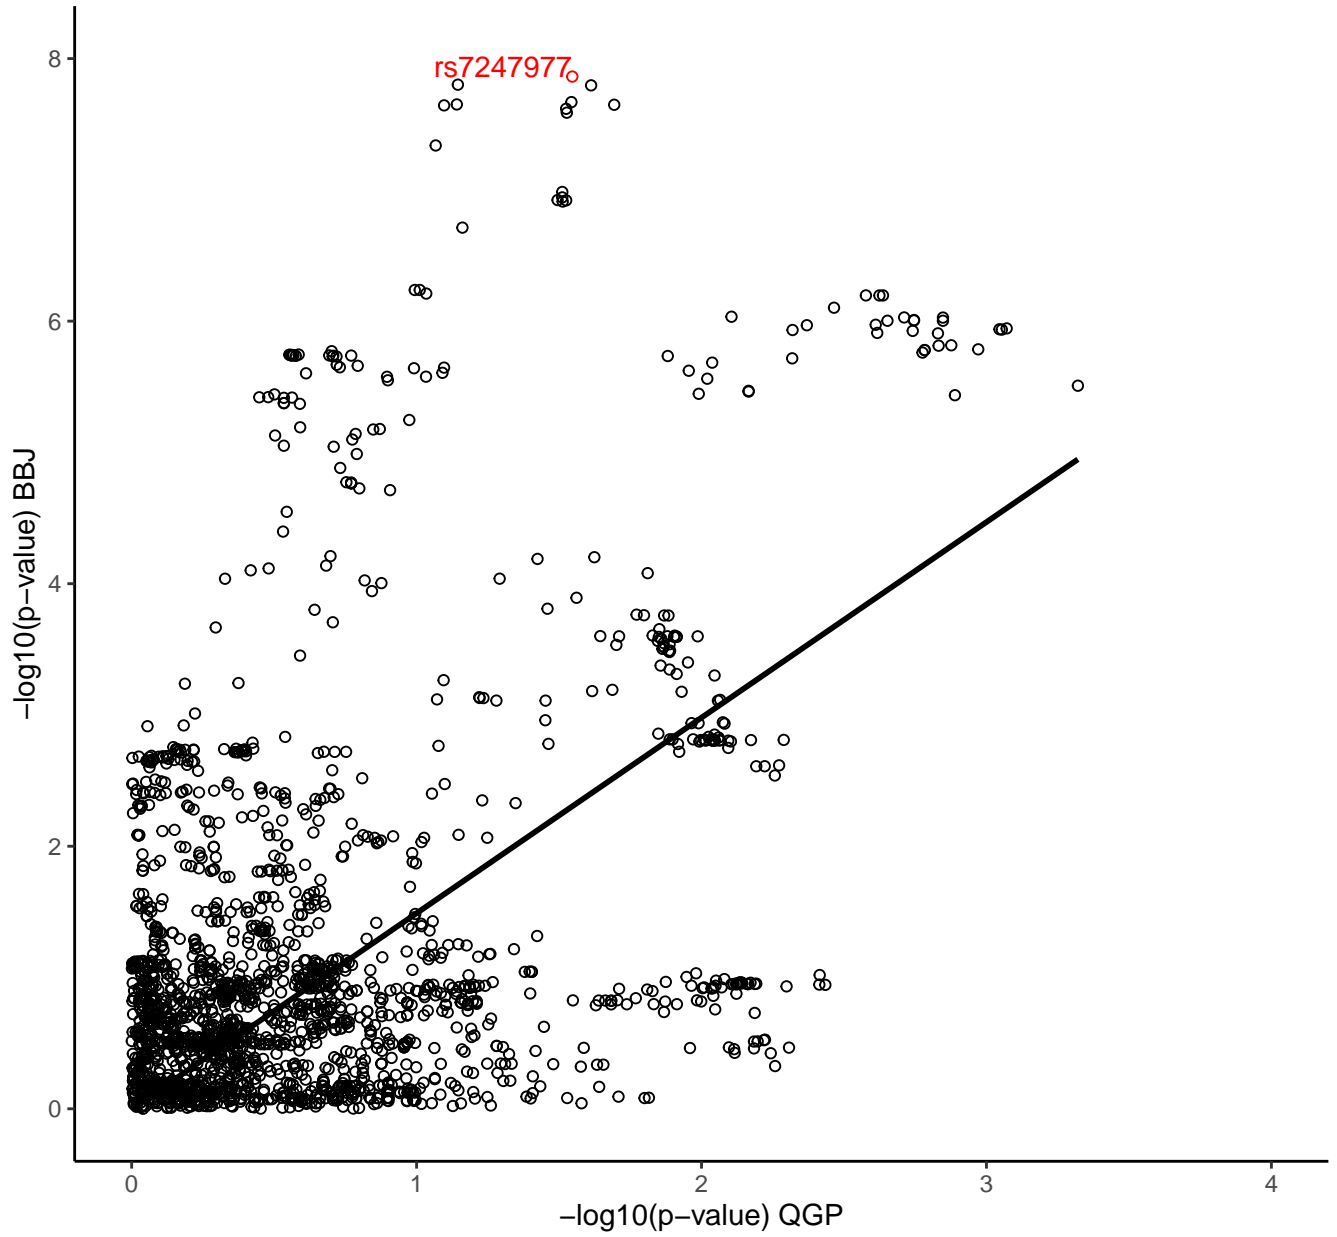

Plt rs6662263

nSNPs = 1600; H2: 0.723; H3: 0.117; H4: 0.16

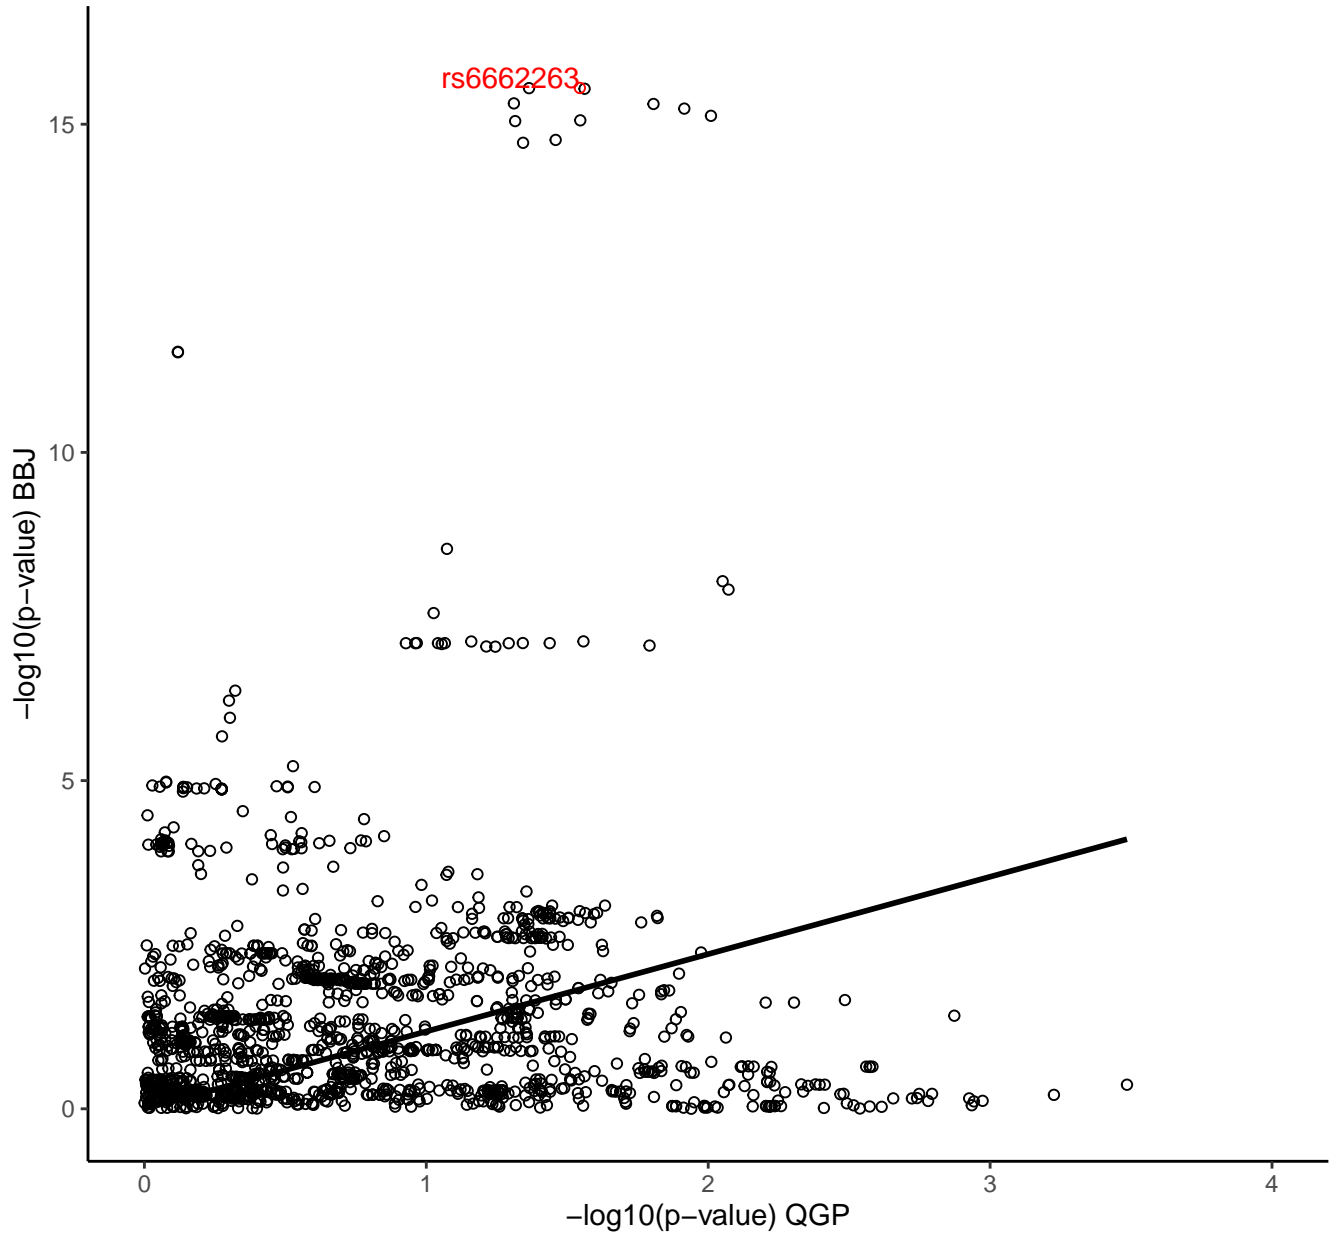

sCr rs549752

nSNPs = 1773; H2: 0.819; H3: 0.0605; H4: 0.12

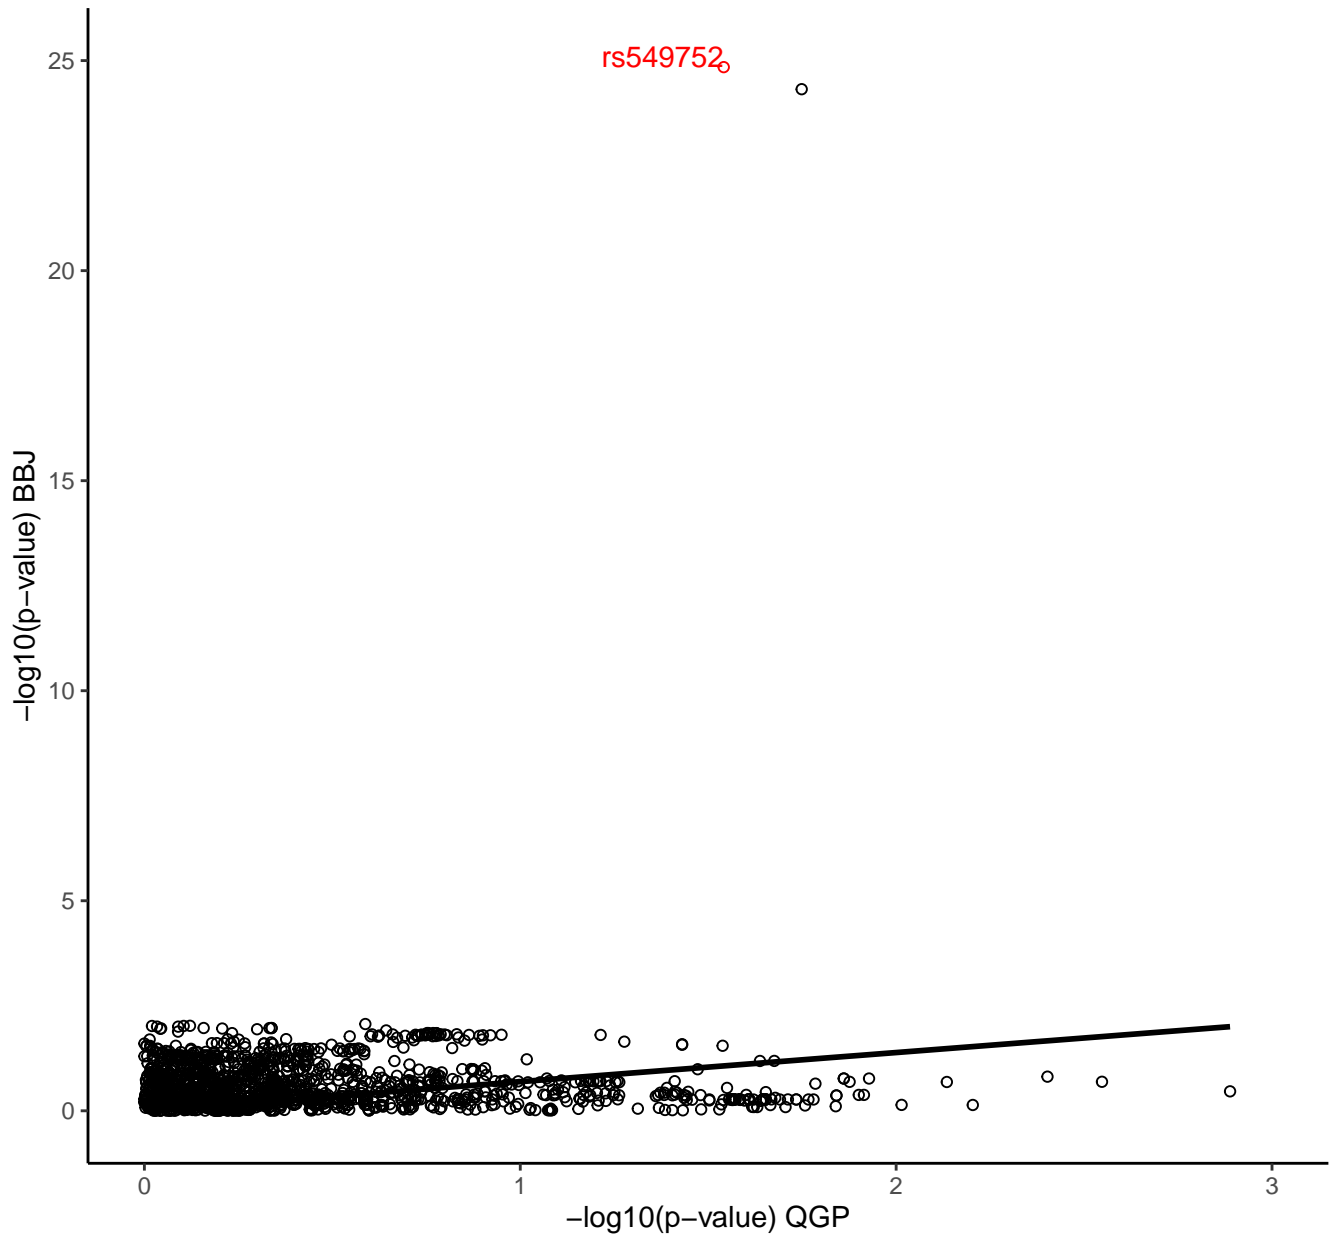

MCH rs62482241

nSNPs = 864; H2: 0.836; H3: 0.0292; H4: 0.134

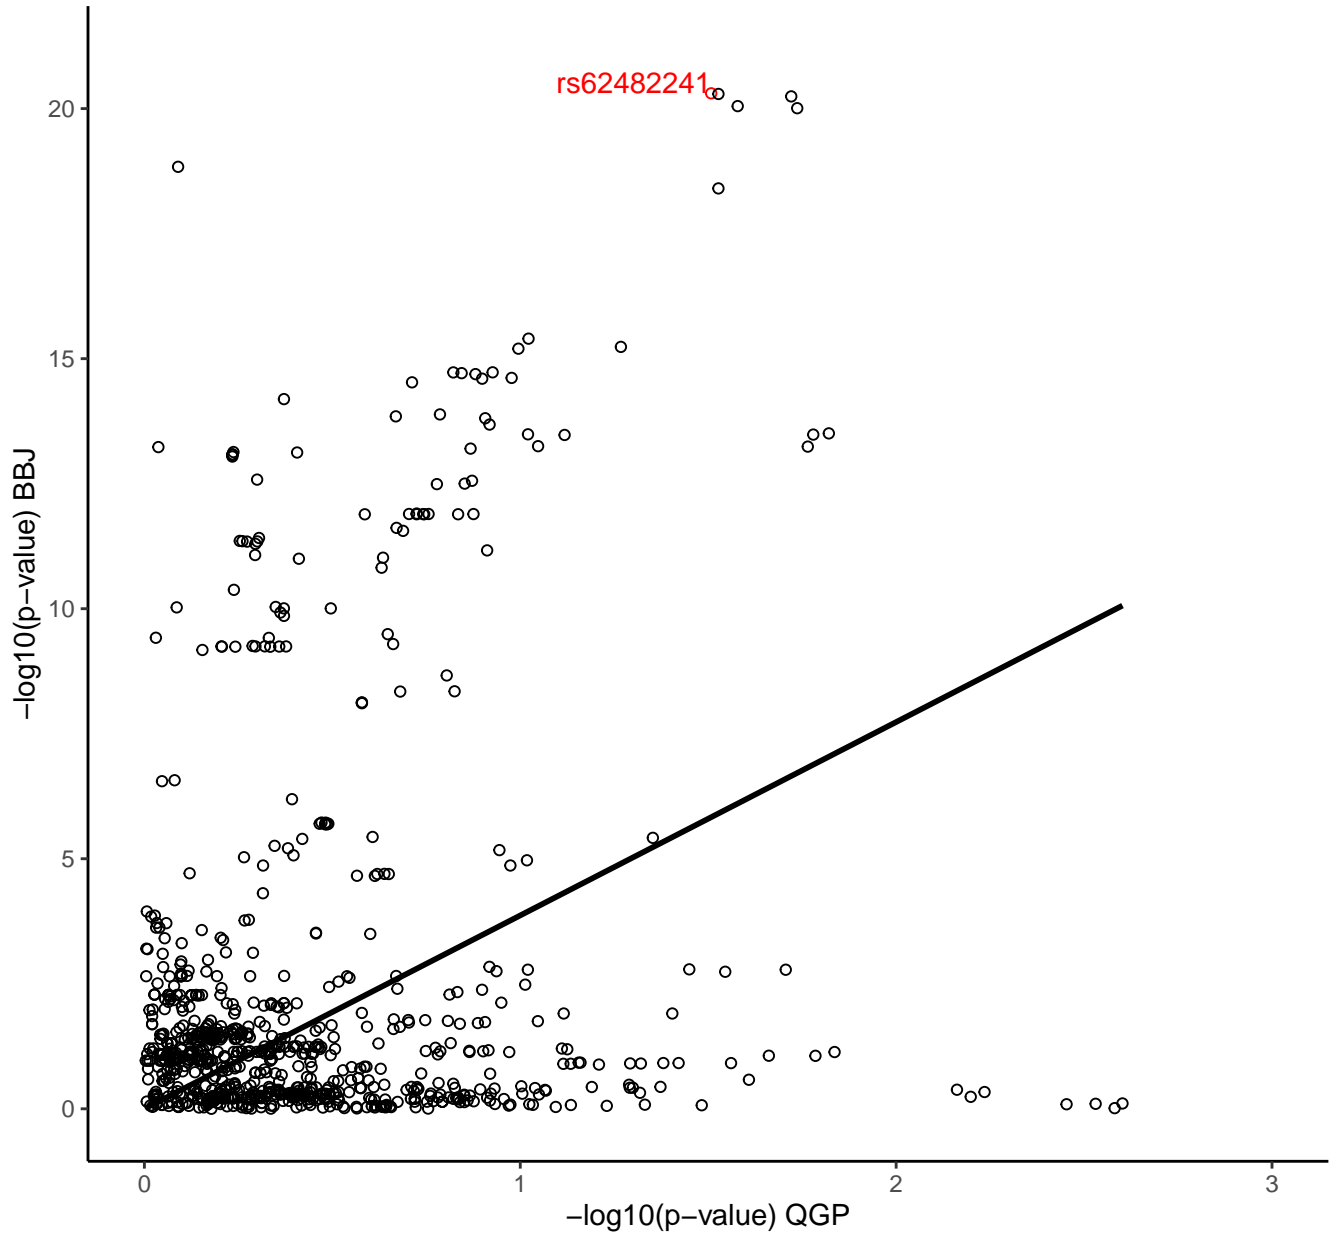

sCr rs77924615

nSNPs = 1450; H2: 0.847; H3: 0.104; H4: 0.0486

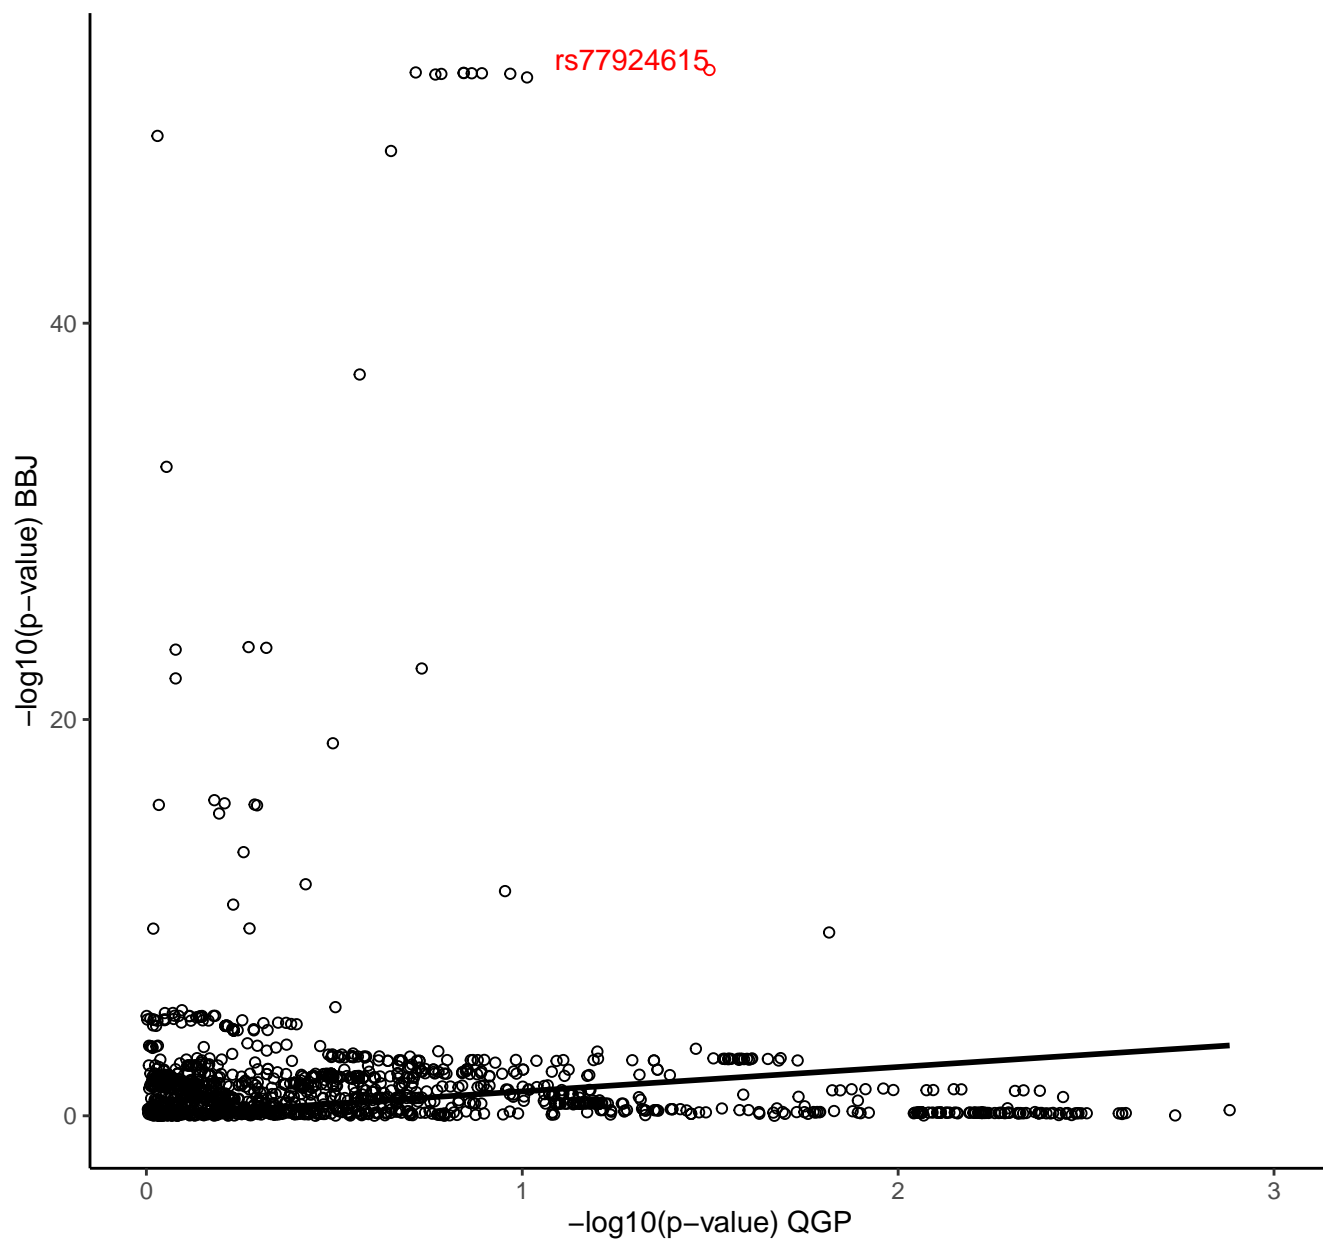

ALP rs28400013

nSNPs = 1563; H2: 0.435; H3: 0.466; H4: 0.0989

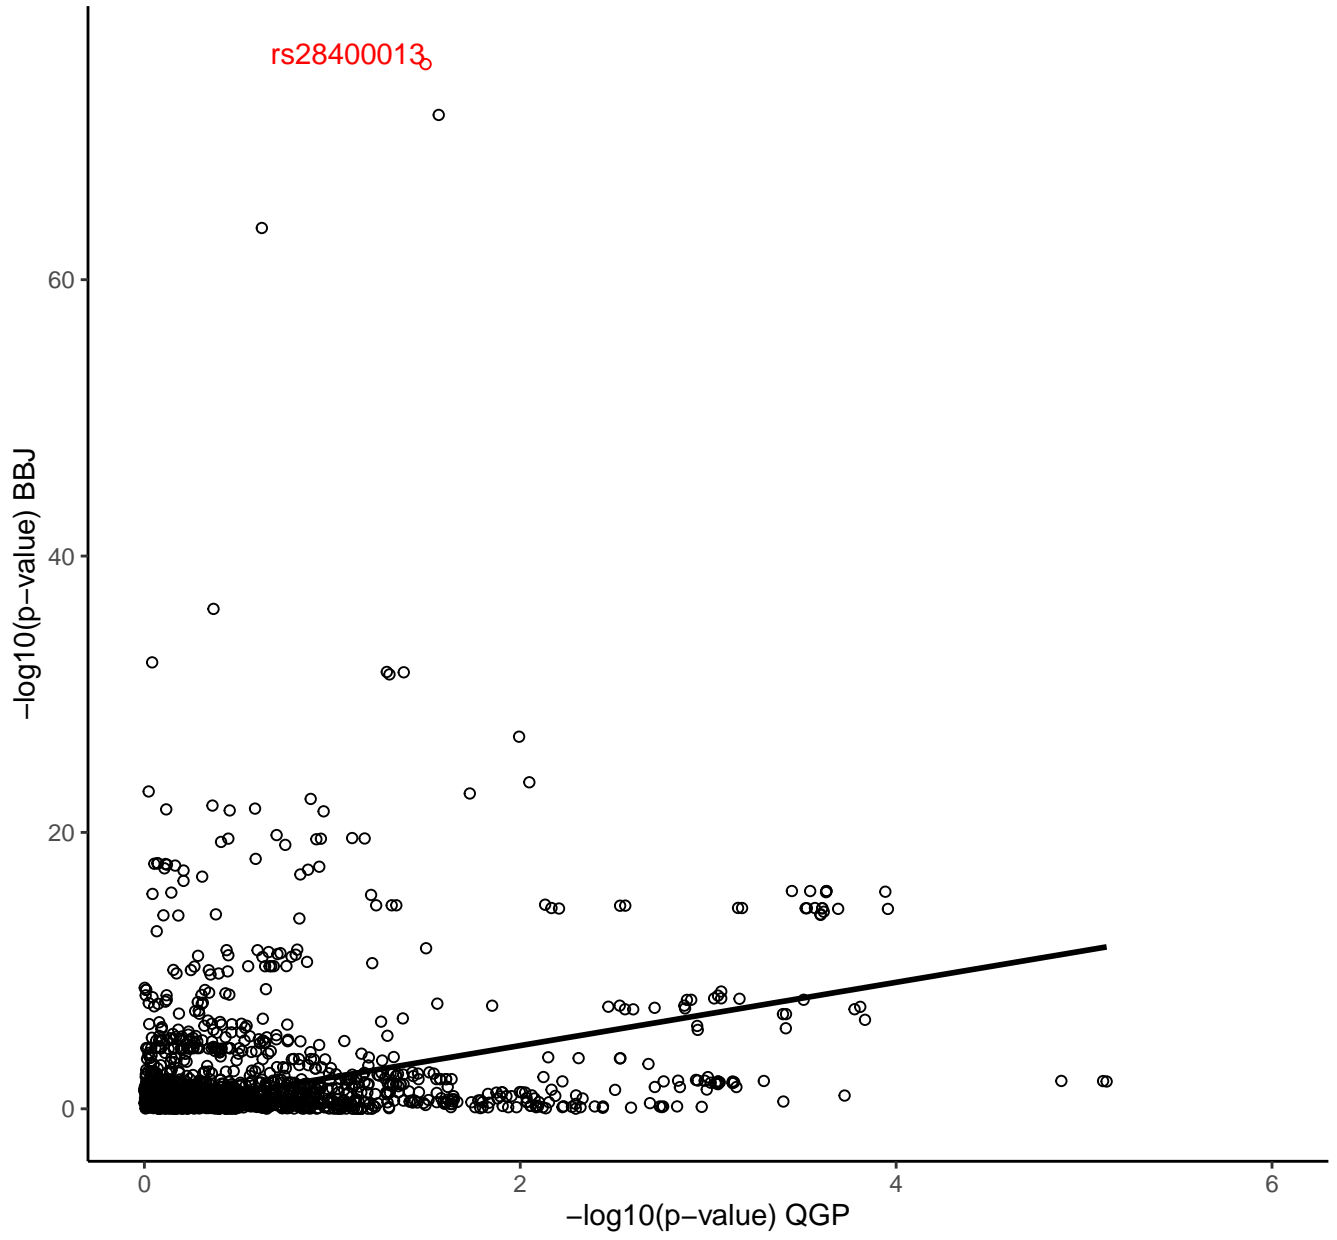

Ca rs7206699

nSNPs = 1280; H2: 0.896; H3: 0.0471; H4: 0.0573

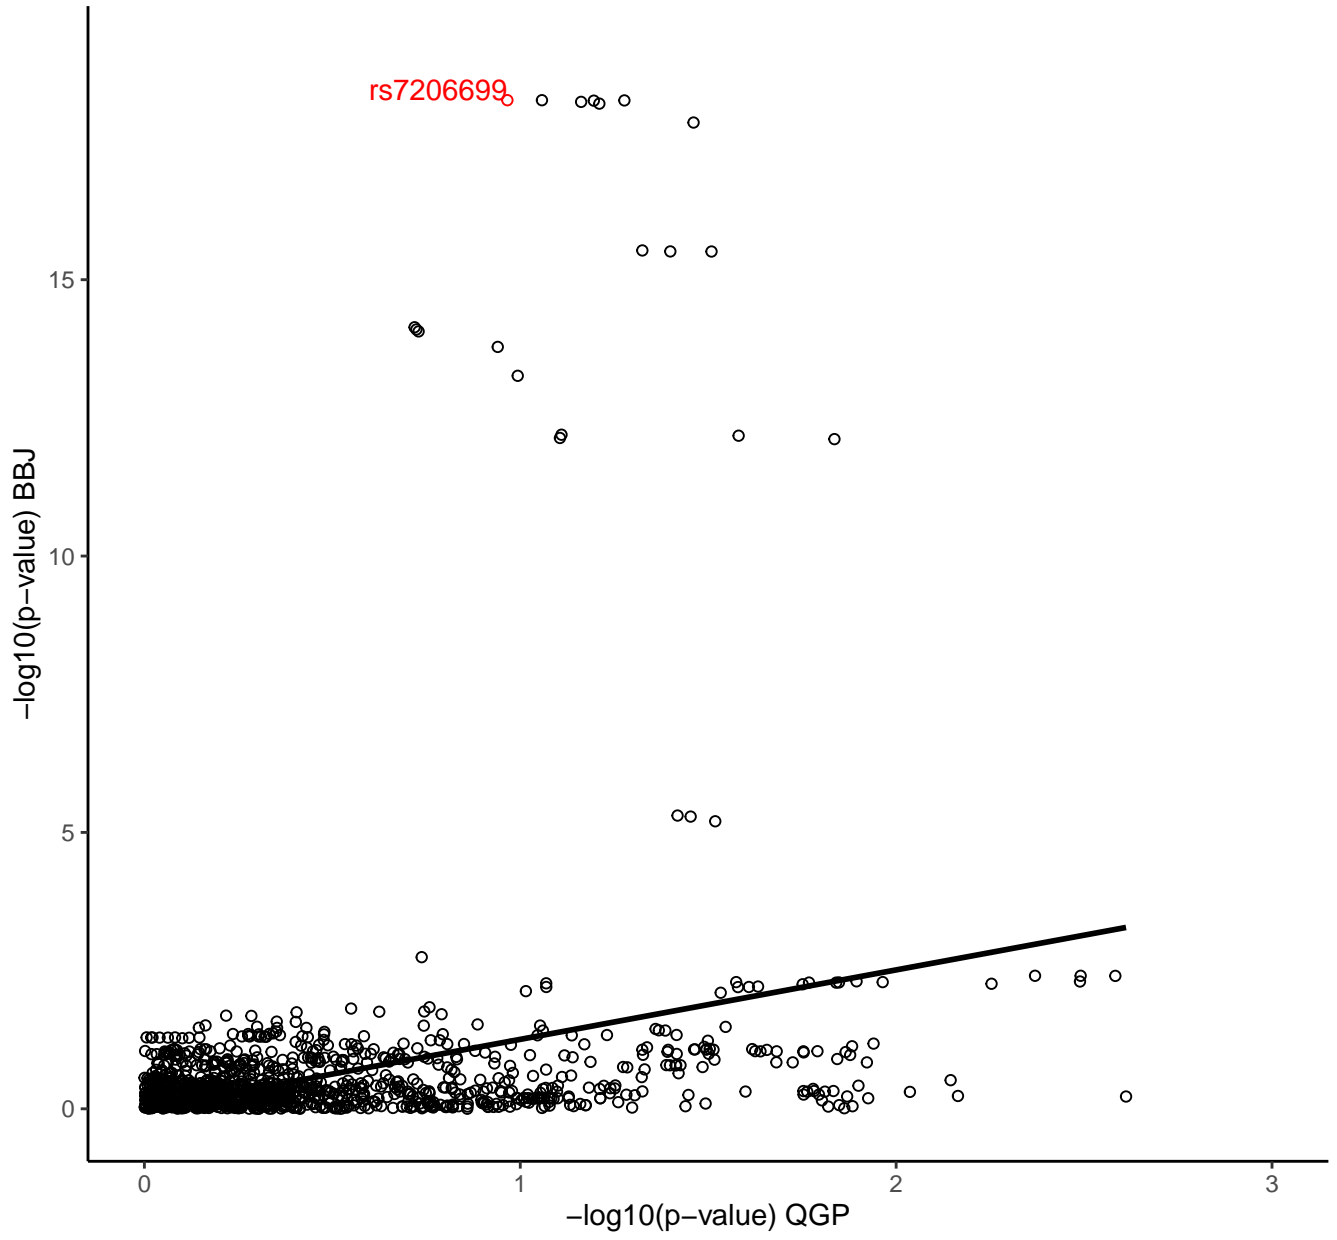



Hb rs12610645

nSNPs = 1464; H2: 0.715; H3: 0.0775; H4: 0.205

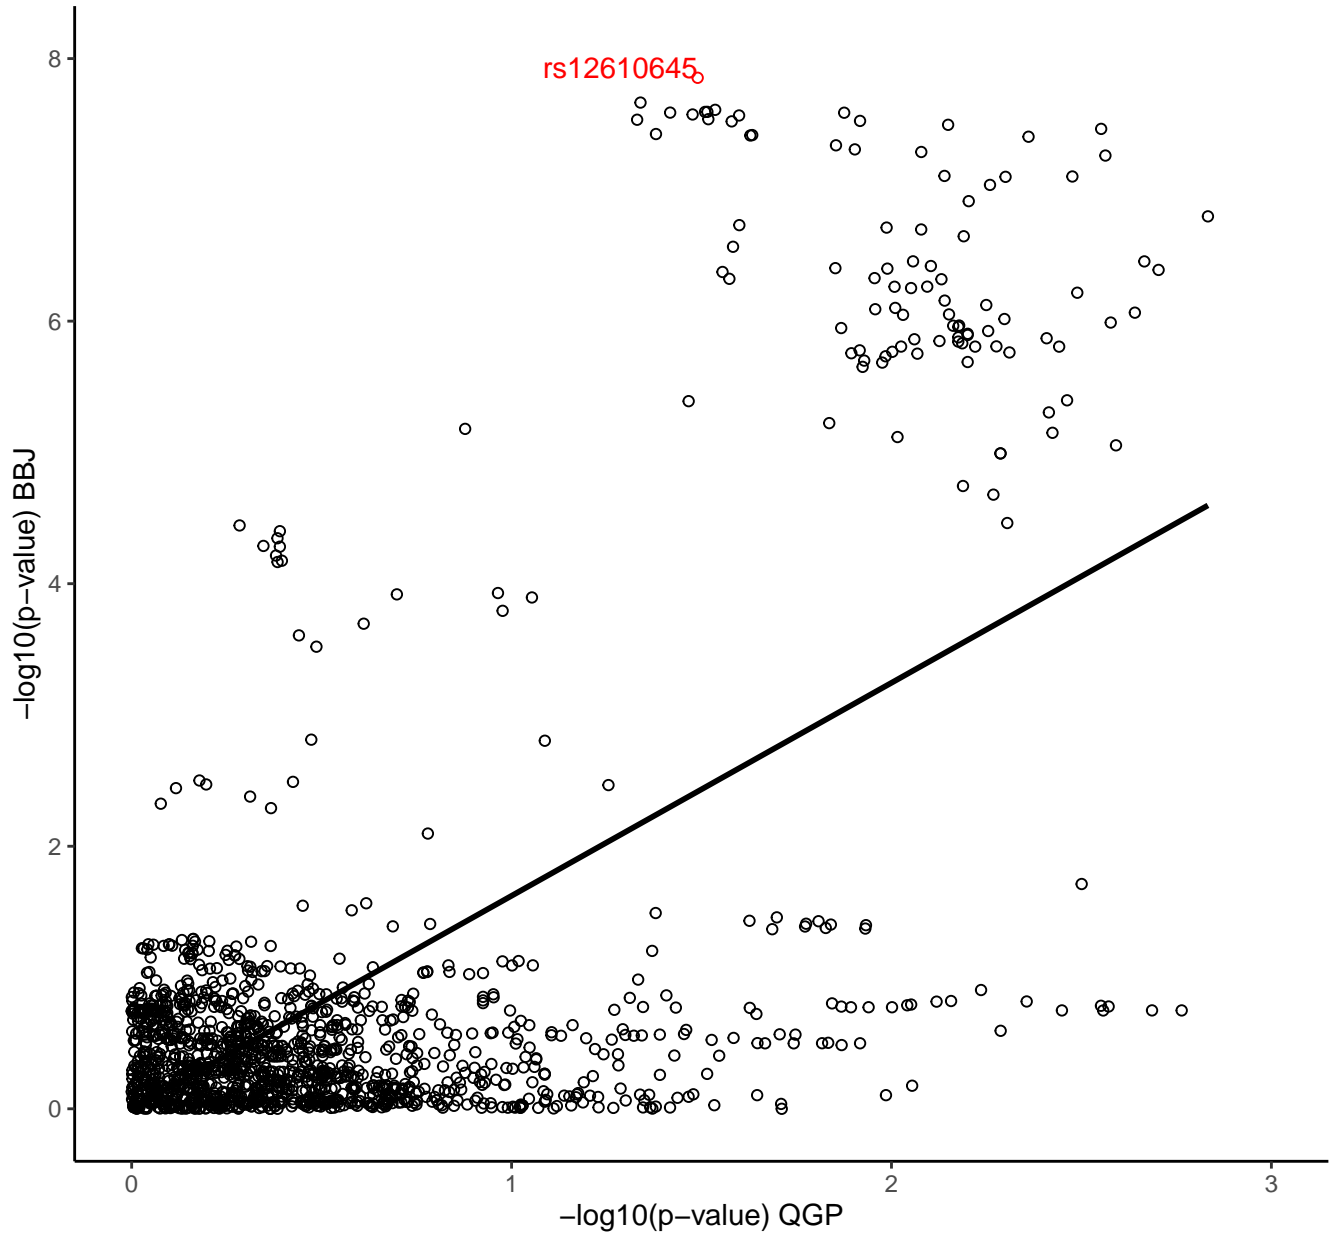

### ALT rs2109505

nSNPs = 1174; H2: 0.897; H3: 0.0422; H4: 0.0604

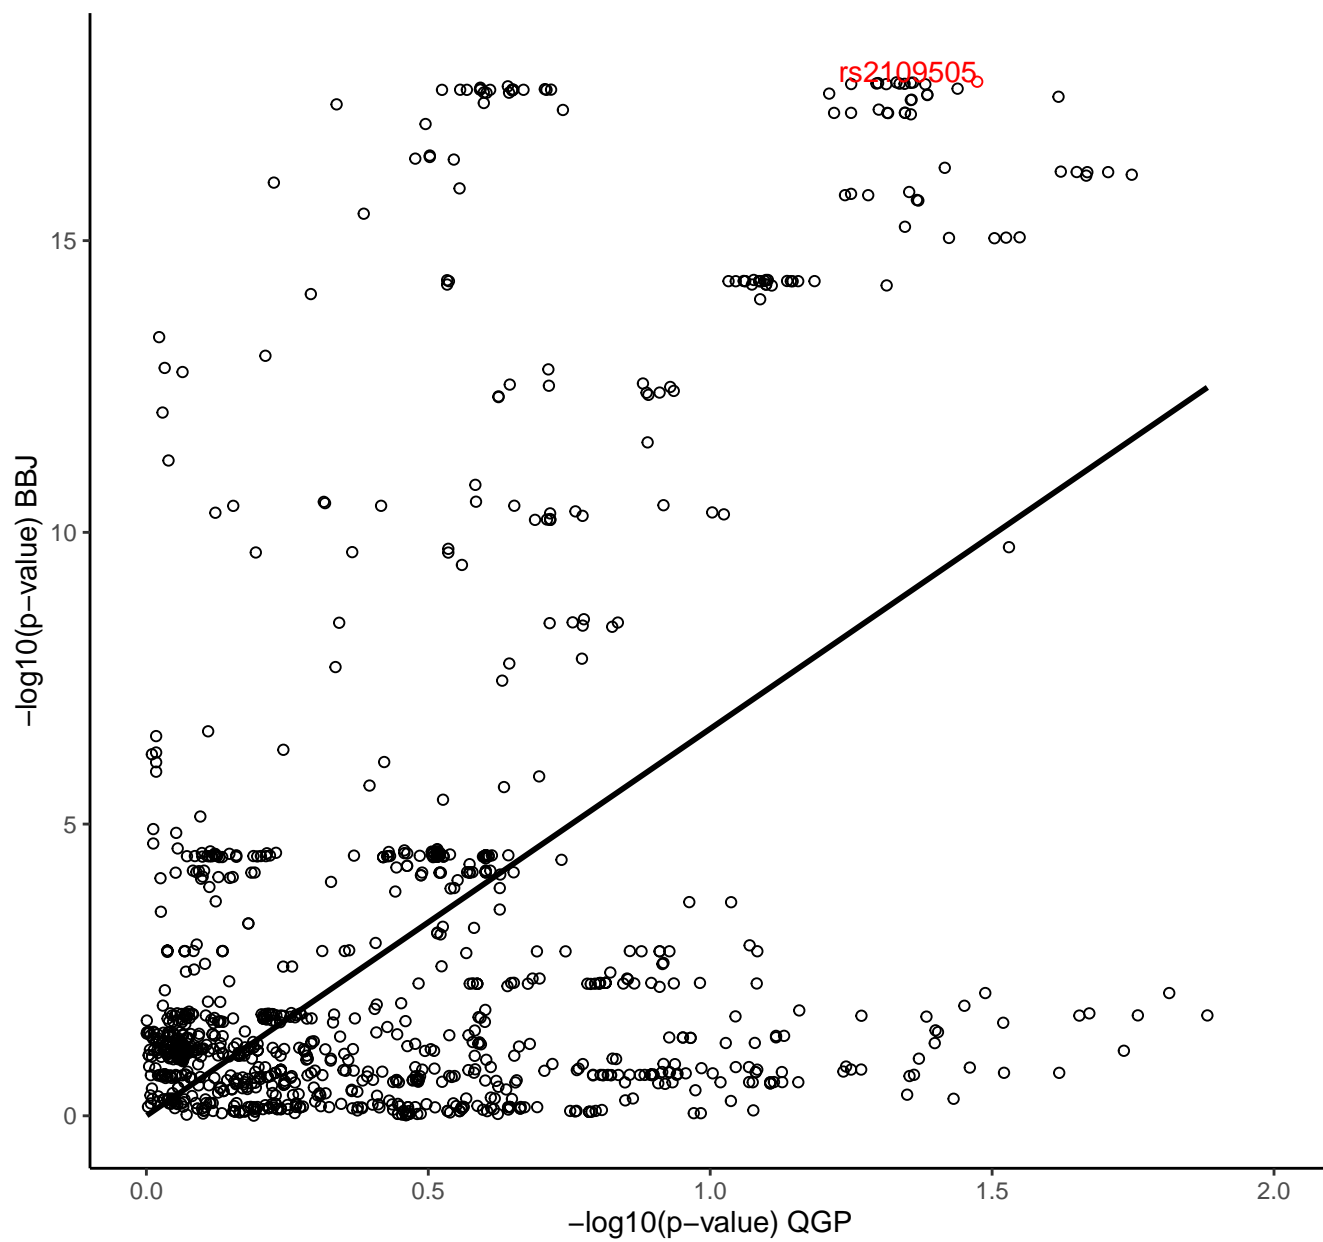

Ht rs7447593

nSNPs = 797; H2: 0.906; H3: 0.0173; H4: 0.073

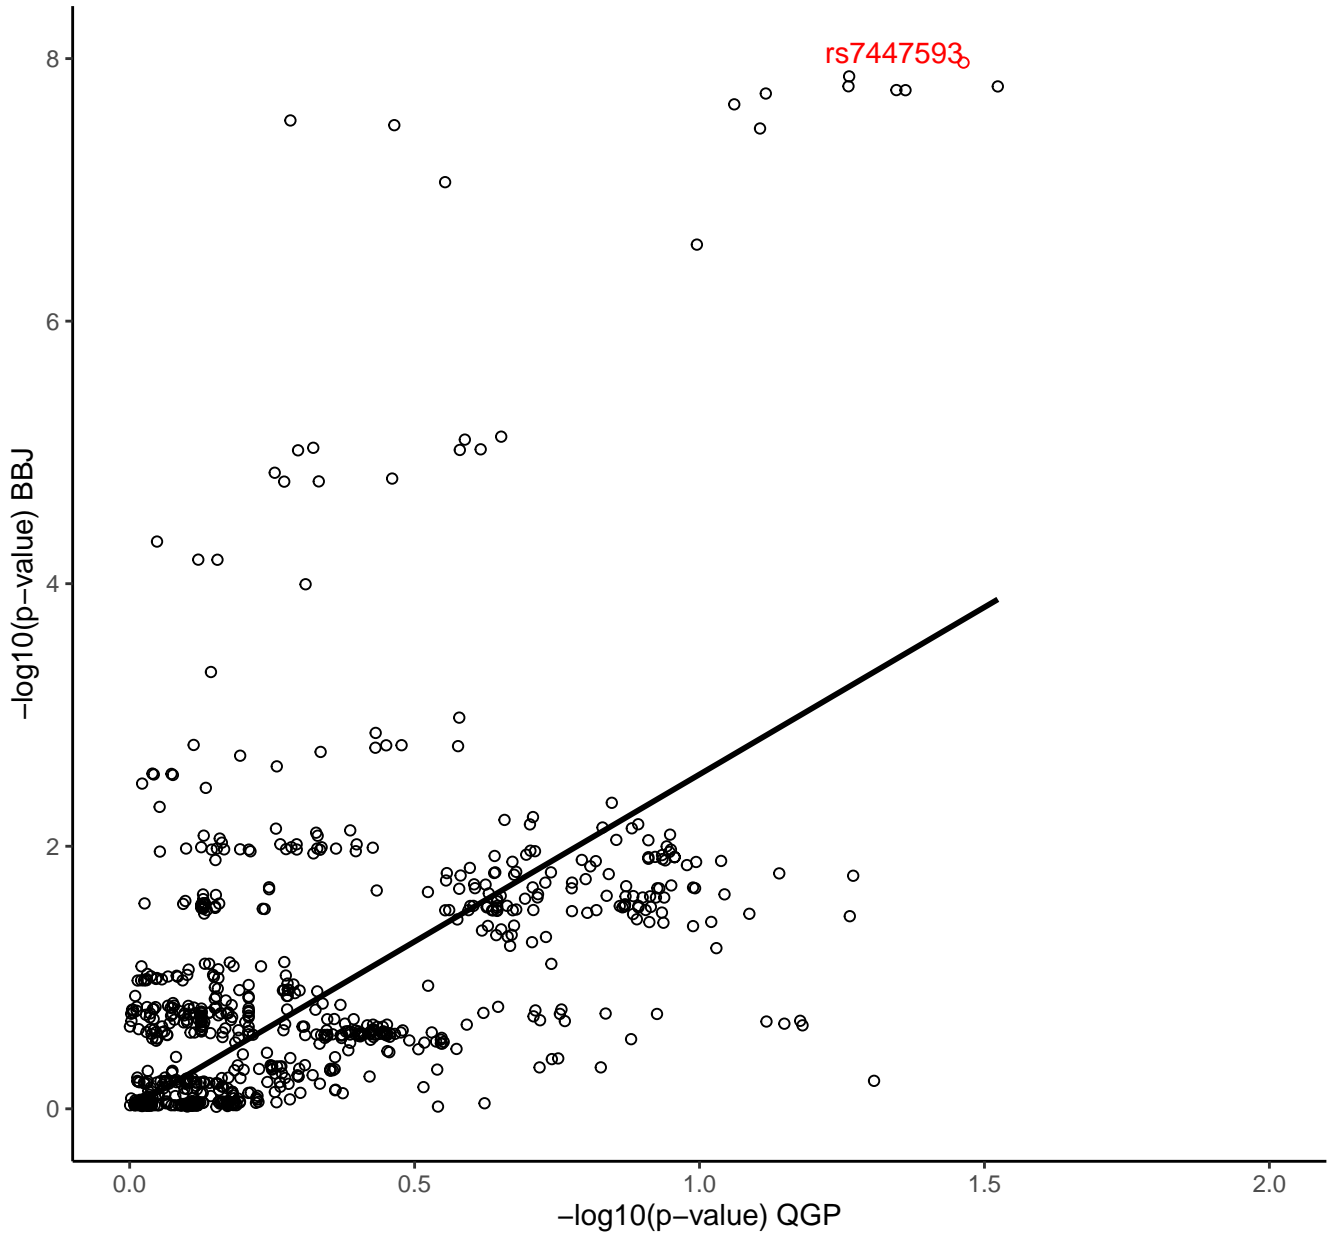

sCr rs11123169

nSNPs = 1429; H2: 0.839; H3: 0.0694; H4: 0.0912

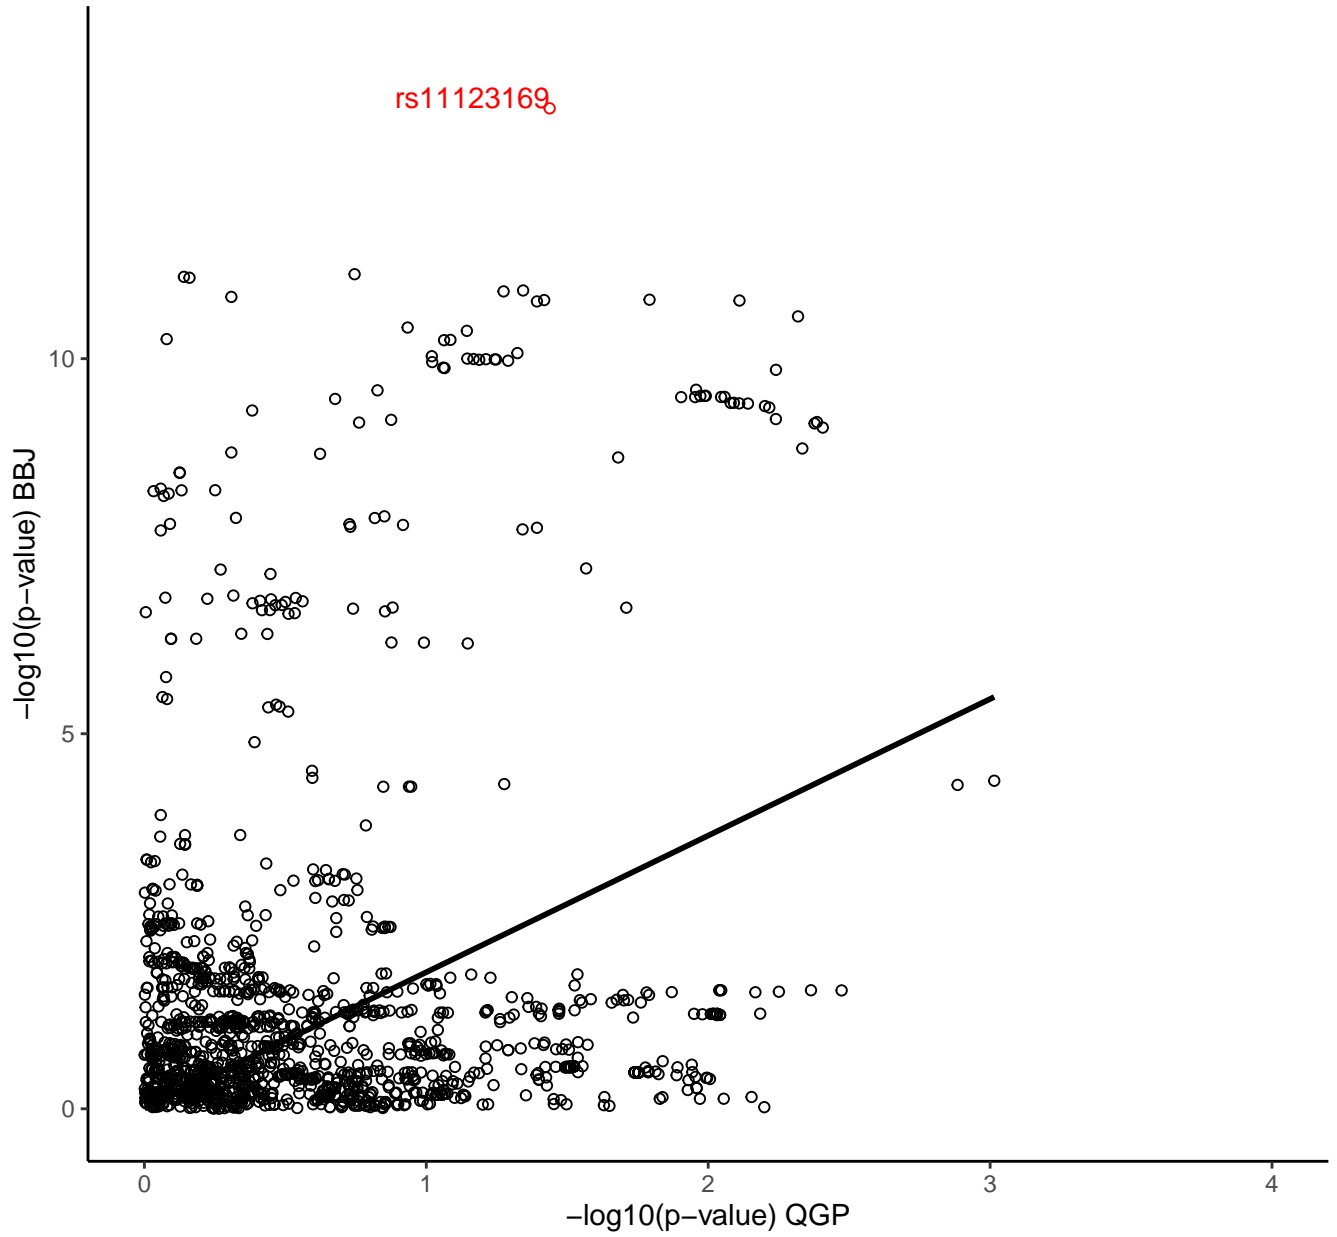

HDL-C rs67053123

nSNPs = 2034; H2: 0.789; H3: 0.0908; H4: 0.121

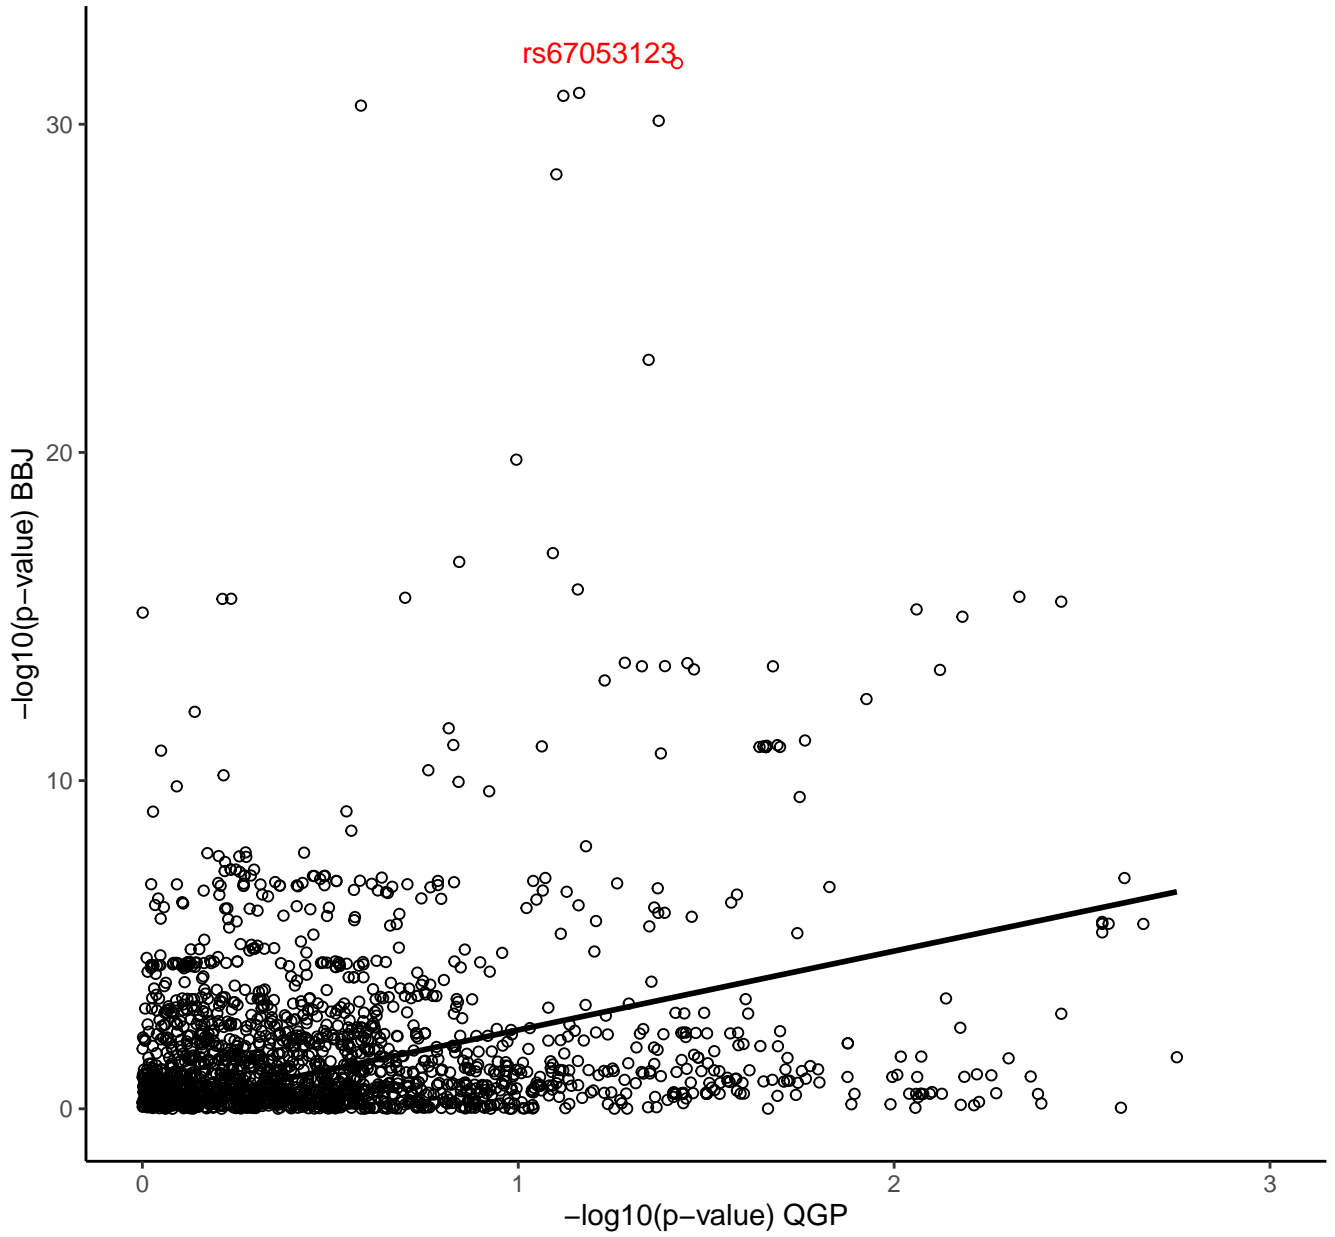

MCH rs3824430

nSNPs = 2289; H2: 0.77; H3: 0.094; H4: 0.136

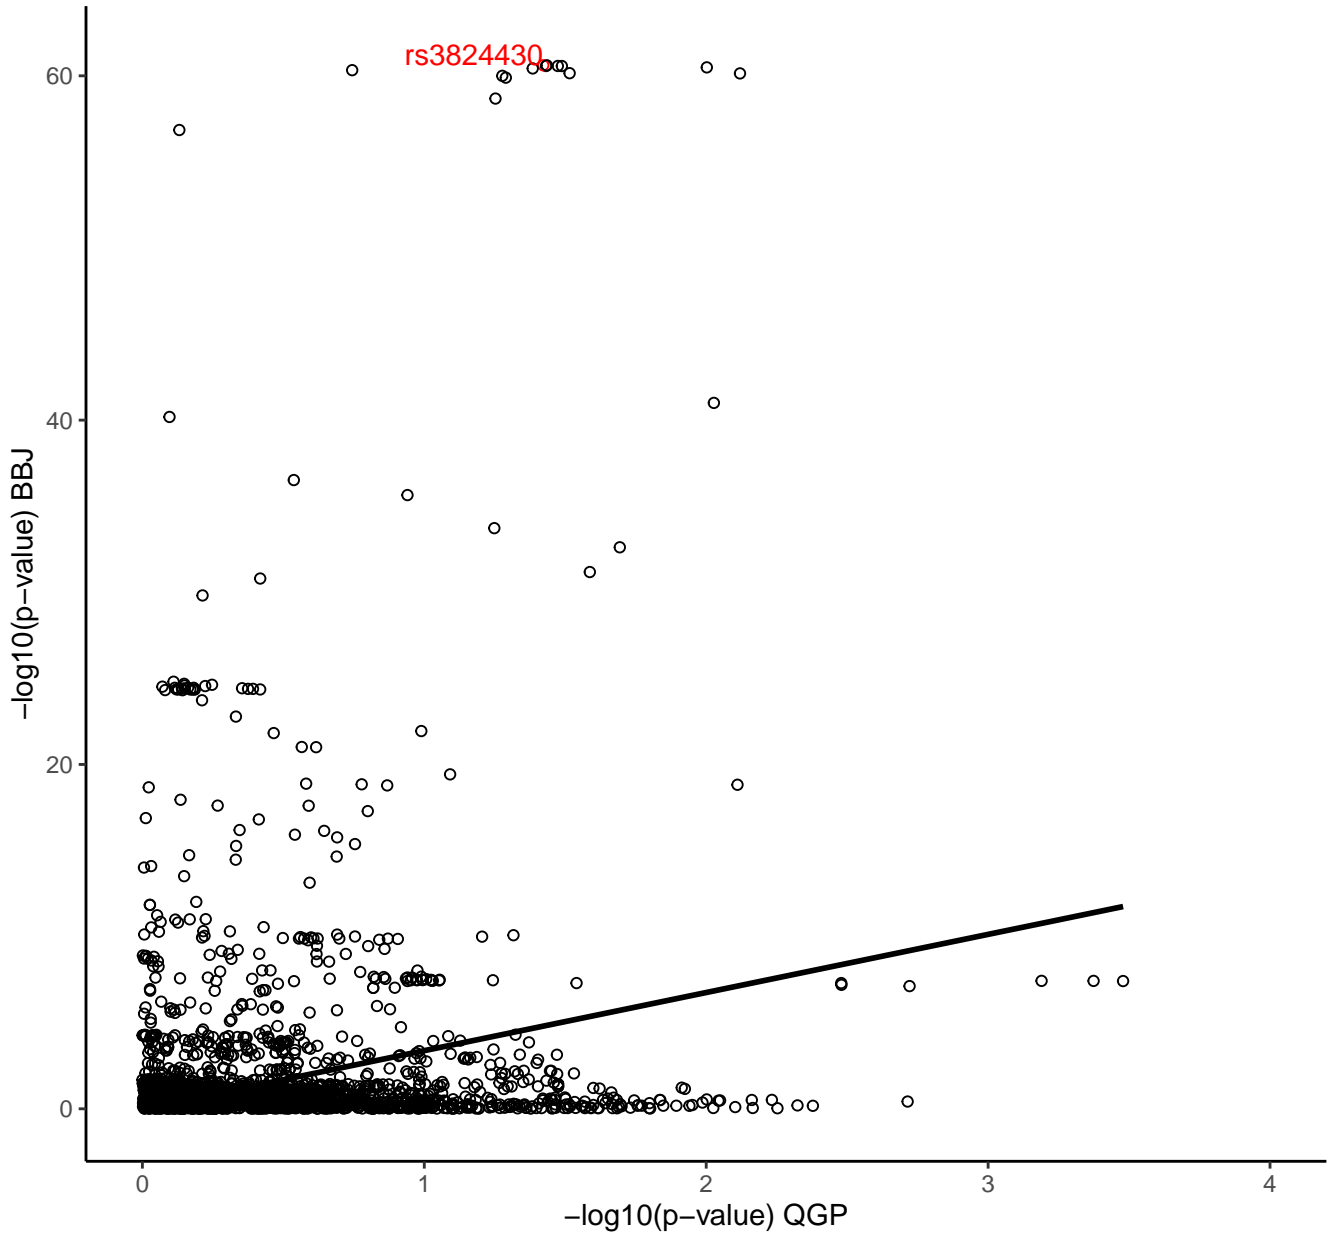

UA rs2220970

nSNPs = 1760; H2: 0.22; H3: 0.136; H4: 0.639

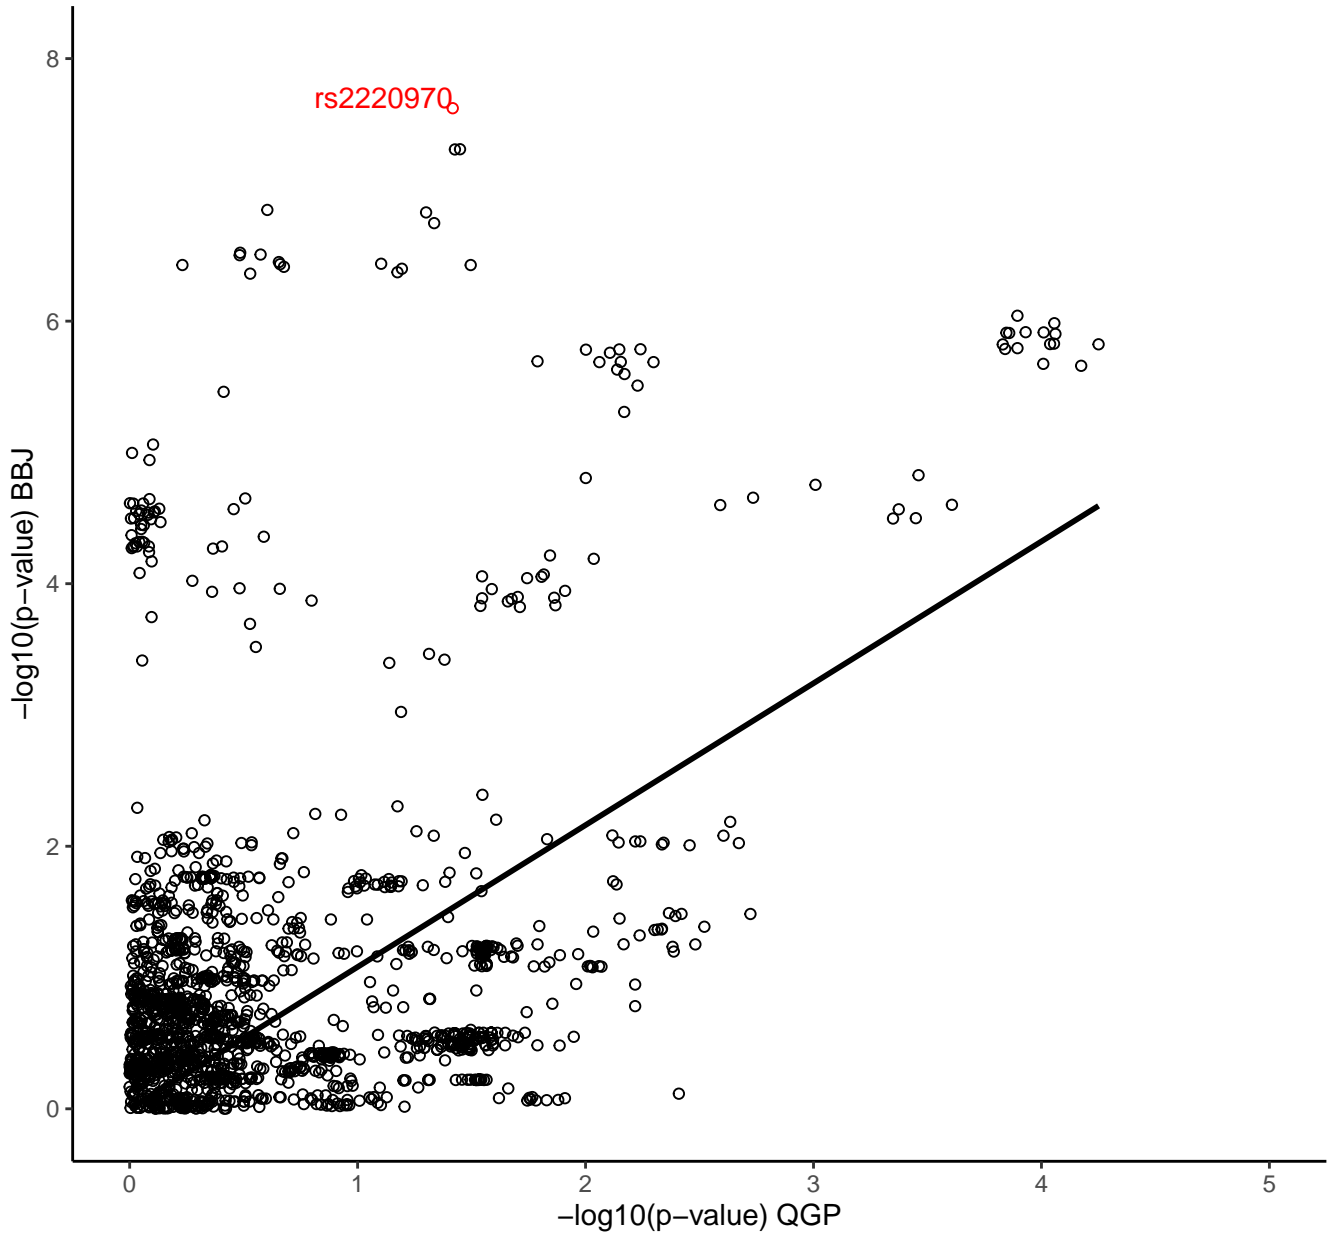

TP rs783653

nSNPs = 1707; H2: 0.884; H3: 0.0602; H4: 0.0458

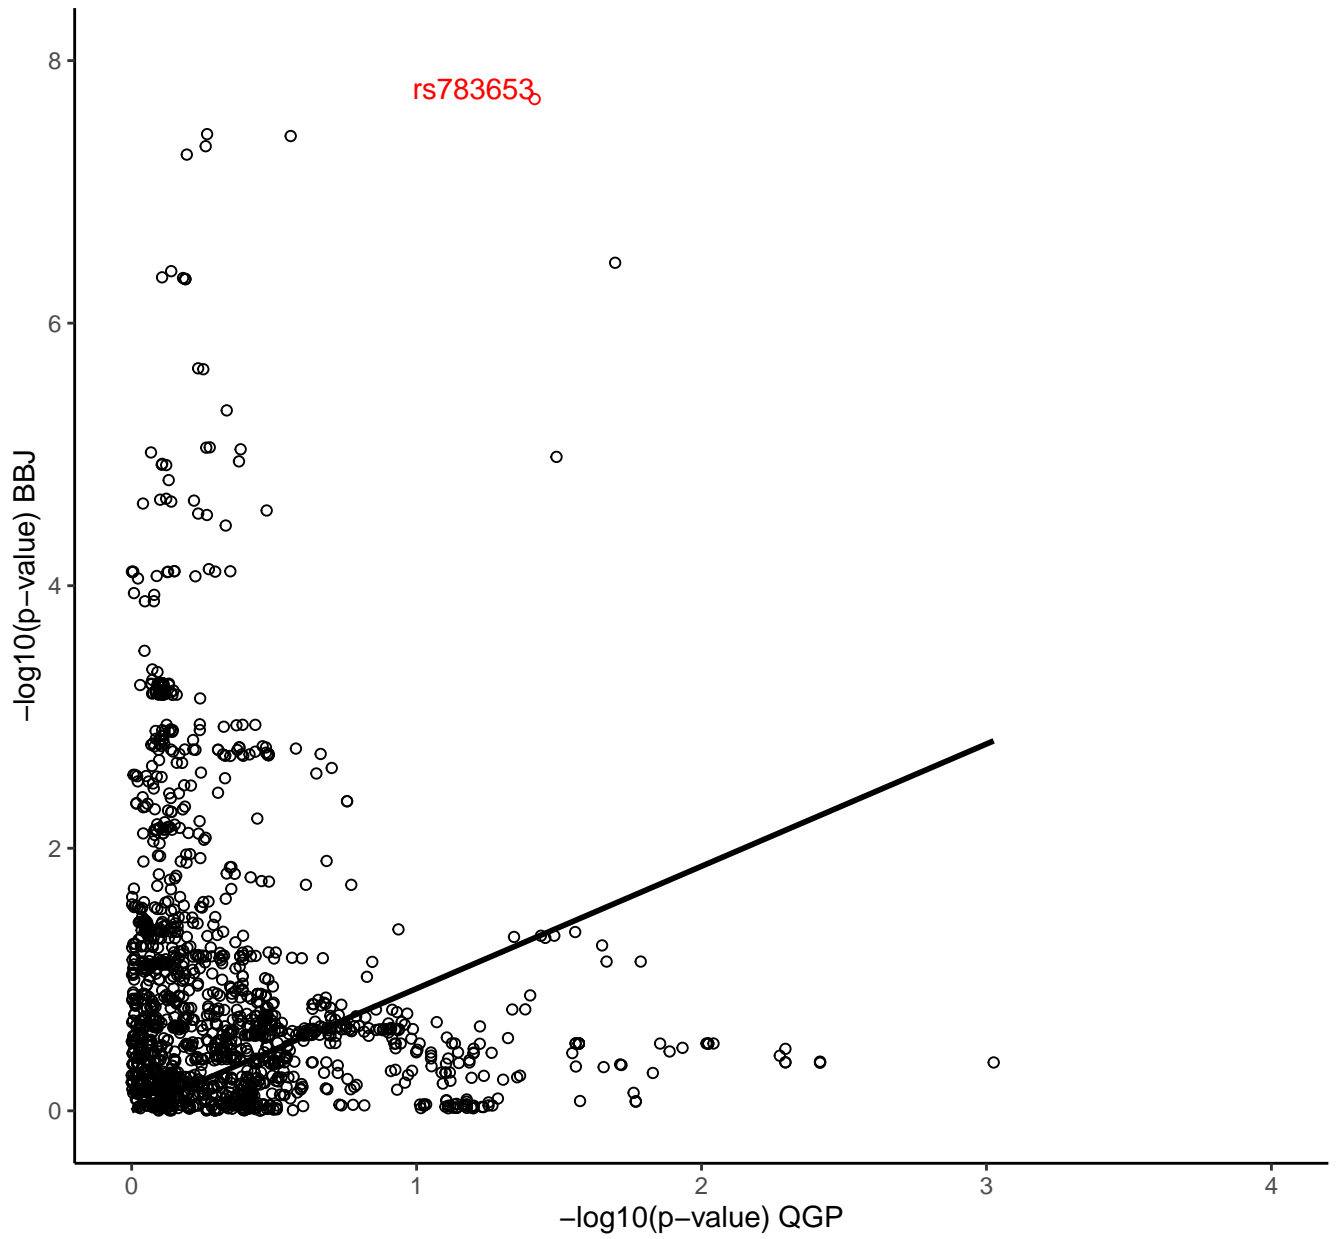



ALP rs11216930

nSNPs = 1588; H2: 0.81; H3: 0.0792; H4: 0.111

rs11216930

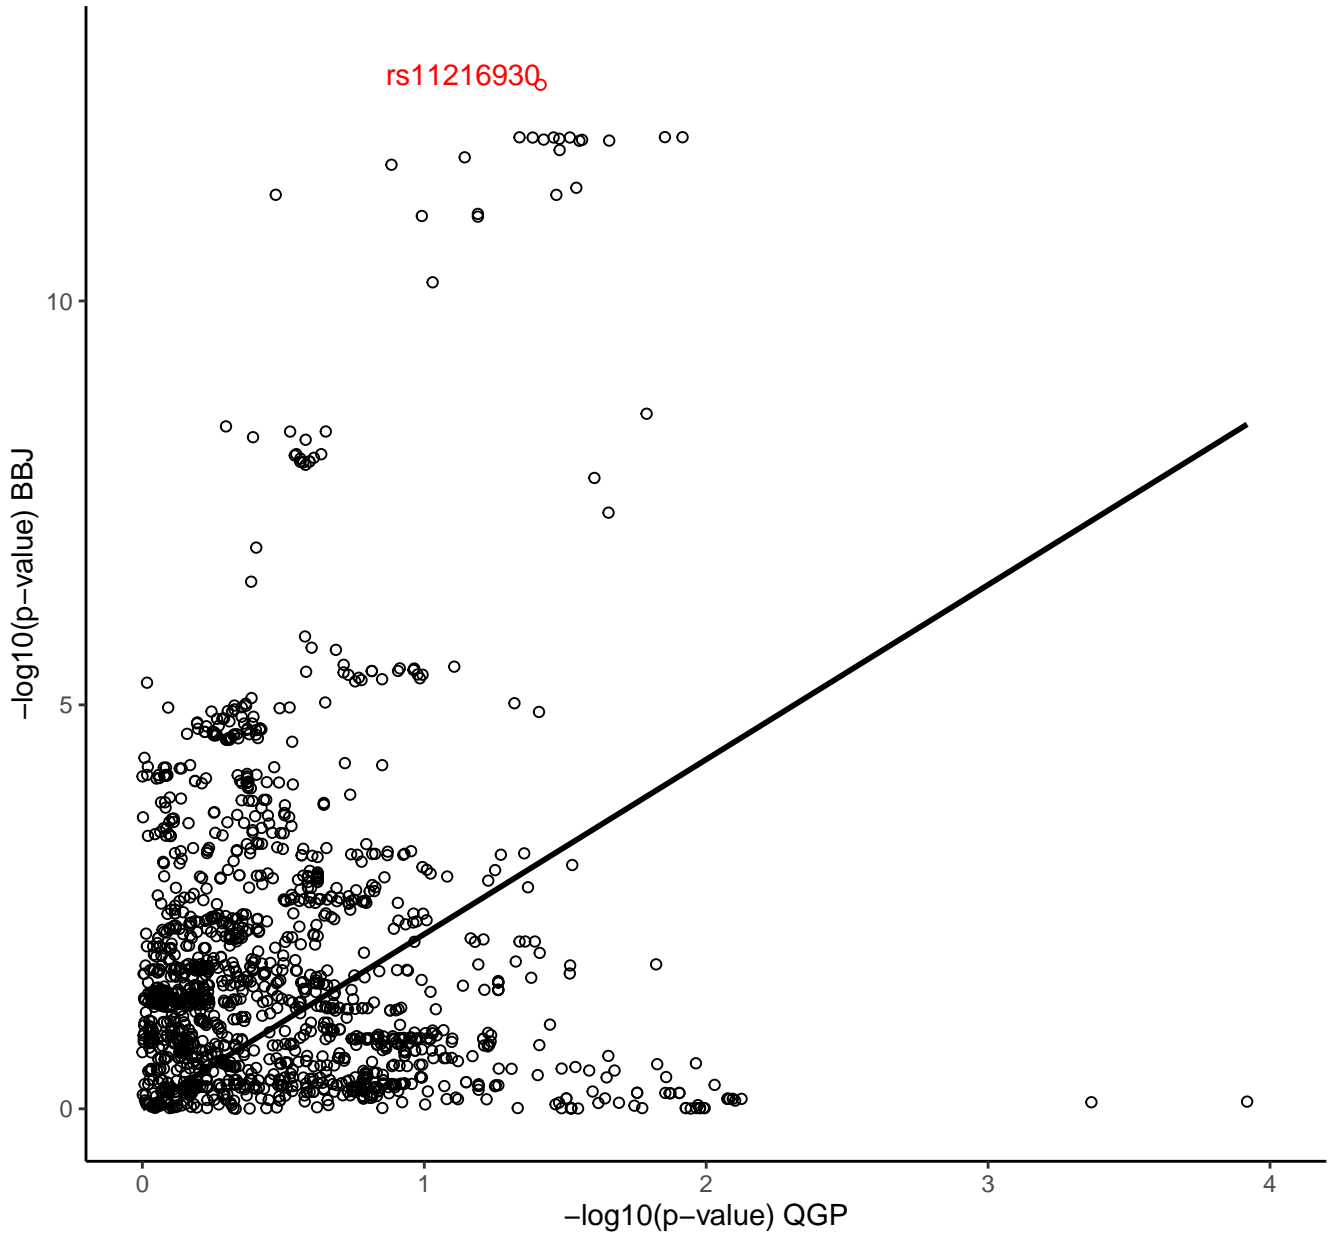

### MCH rs9400273

nSNPs = 1845; H2: 0.824; H3: 0.0645; H4: 0.112

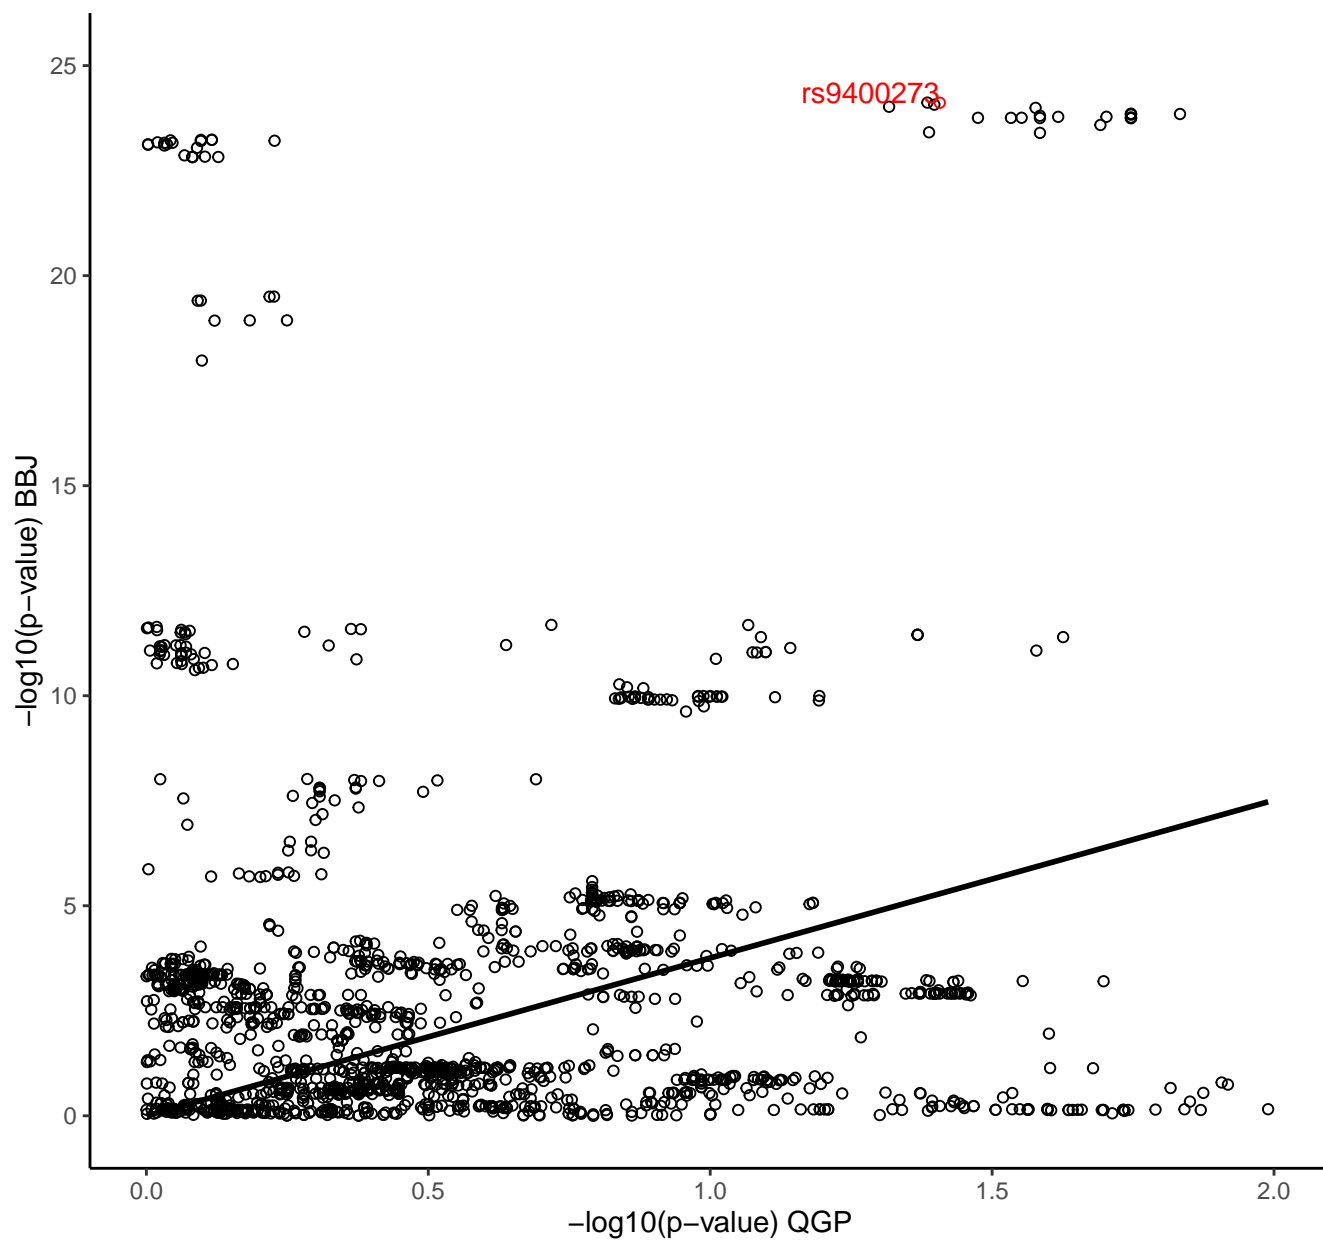

Ht rs342437

nSNPs = 1050; H2: 0.869; H3: 0.069; H4: 0.0618

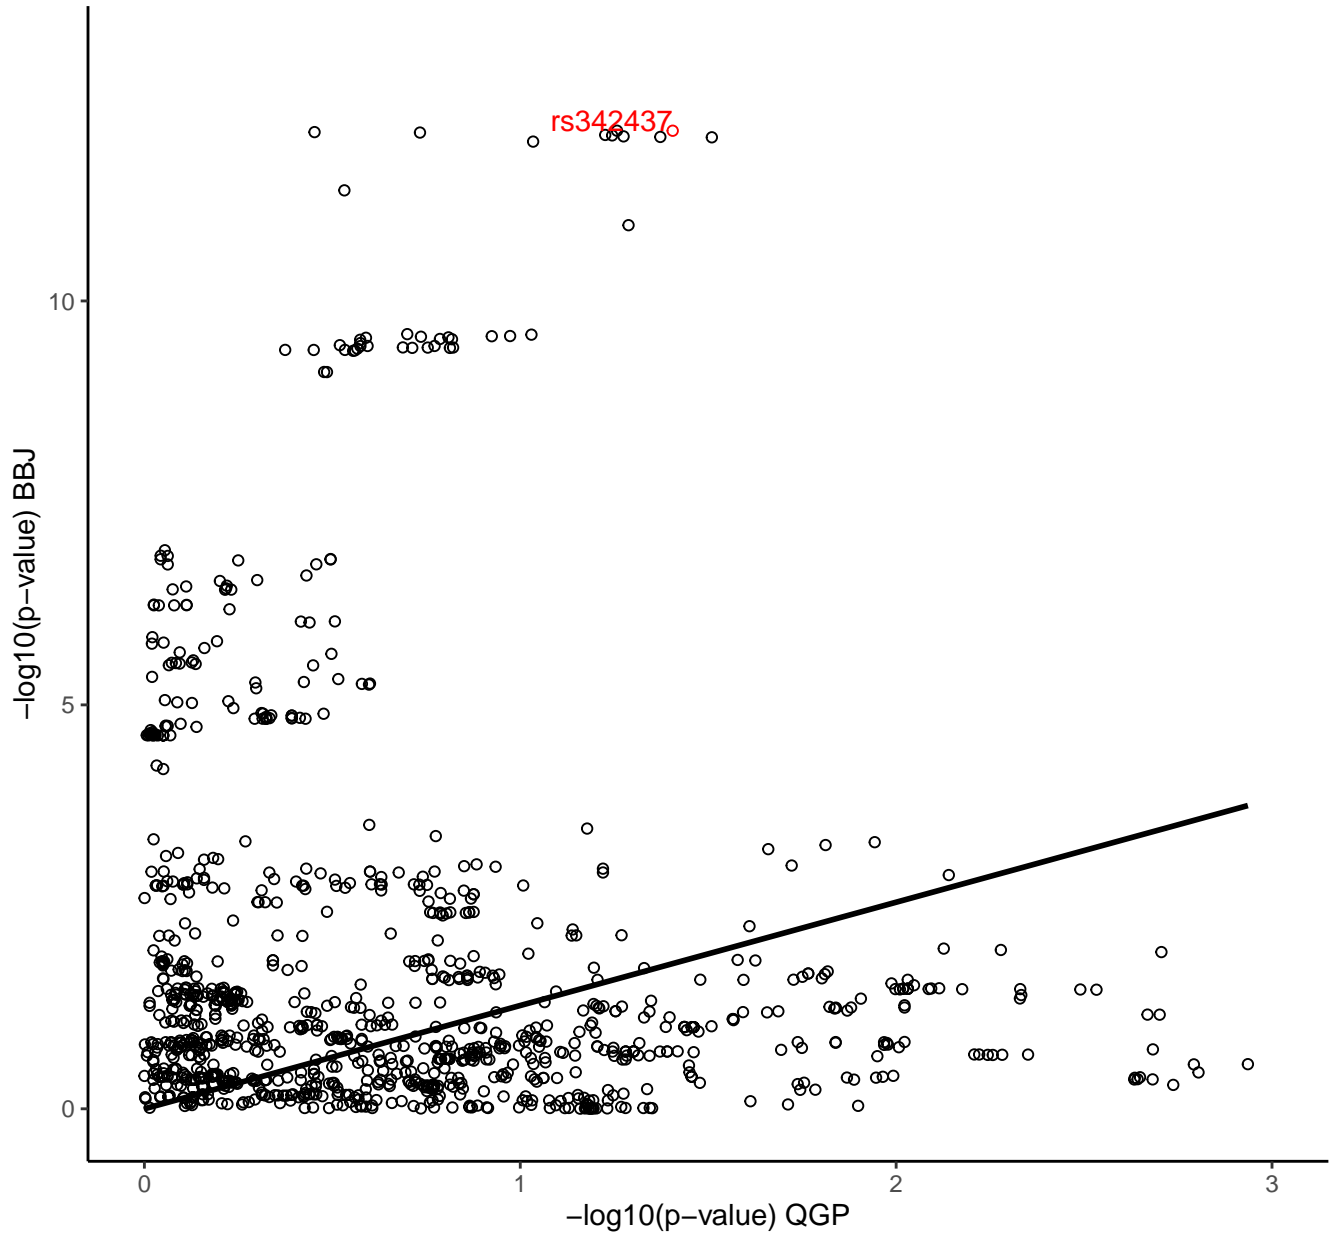

### GGT rs17157266

nSNPs = 1370; H2: 0.857; H3: 0.0382; H4: 0.105

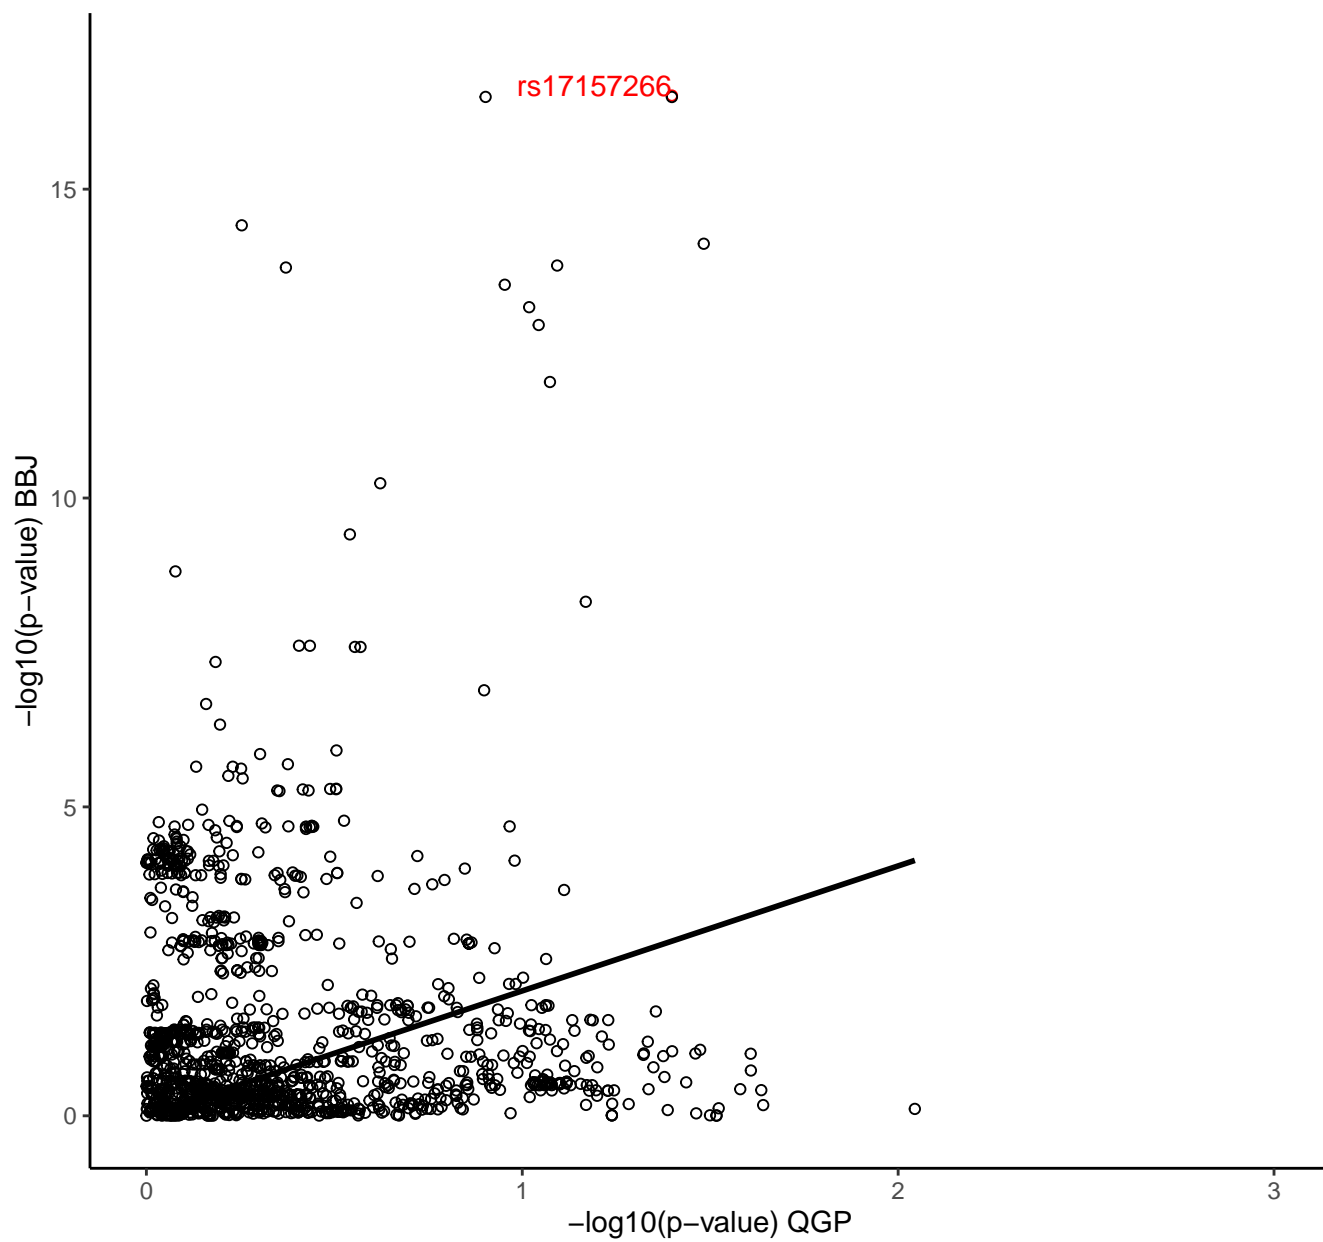

Plt rs6852997

nSNPs = 2484; H2: 0.826; H3: 0.108; H4: 0.0661

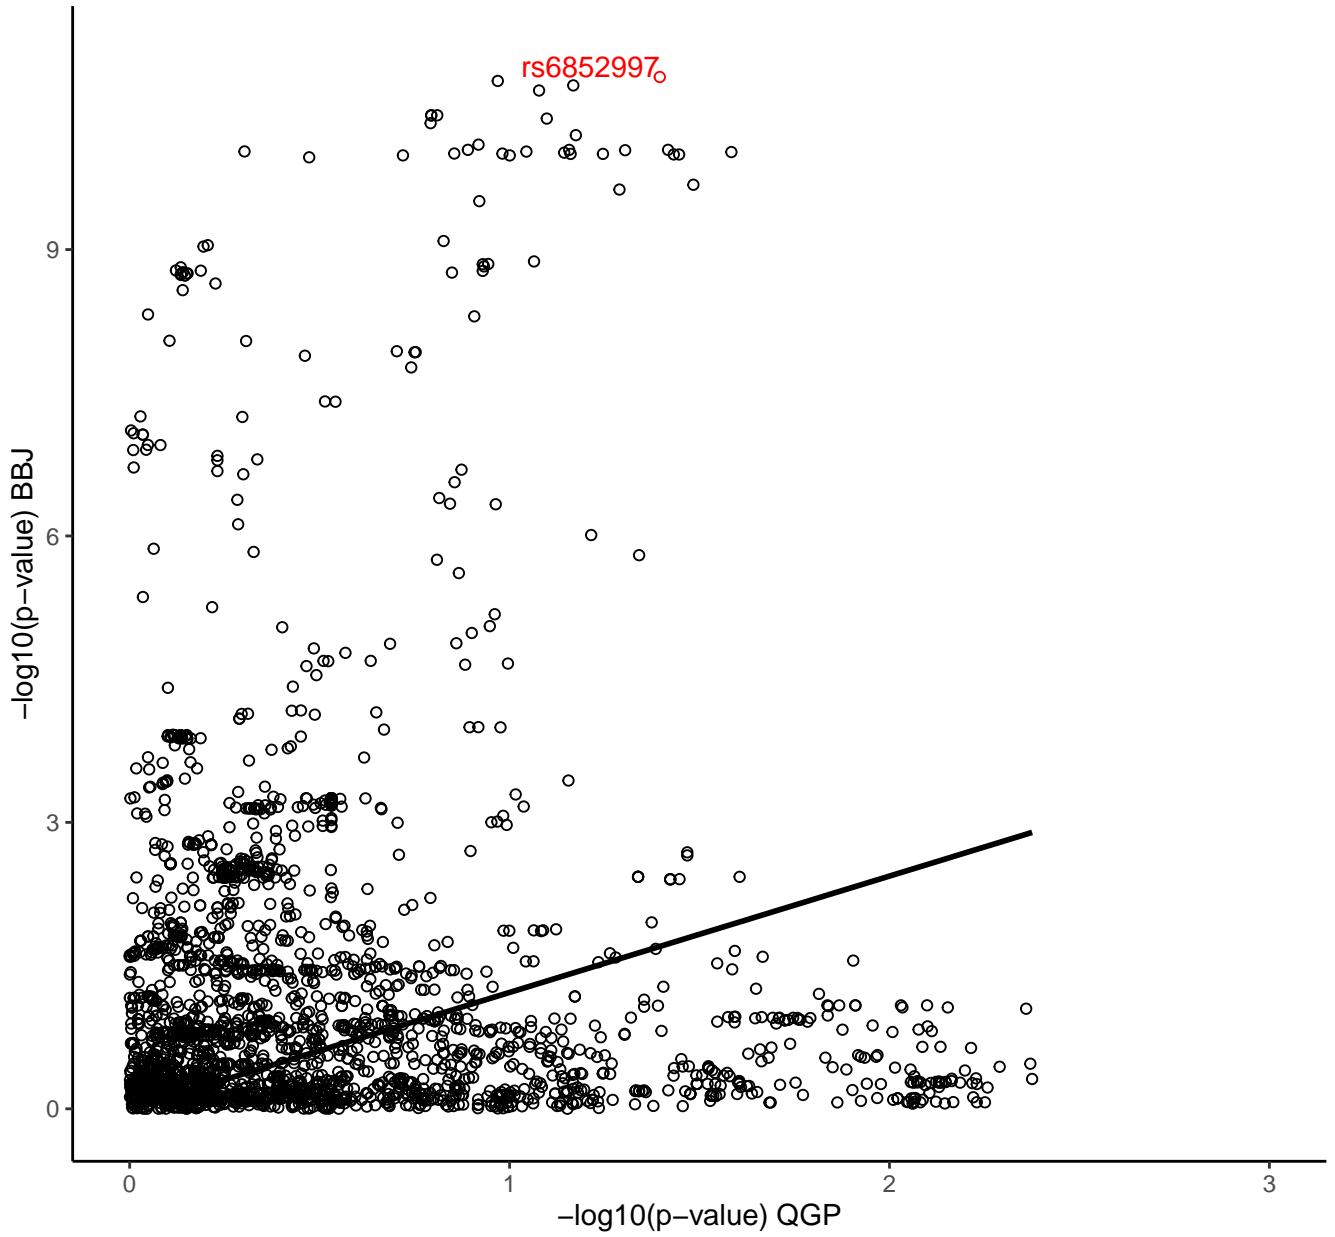

Plt rs1522744

nSNPs = 725; H2: 0.79; H3: 0.0437; H4: 0.166

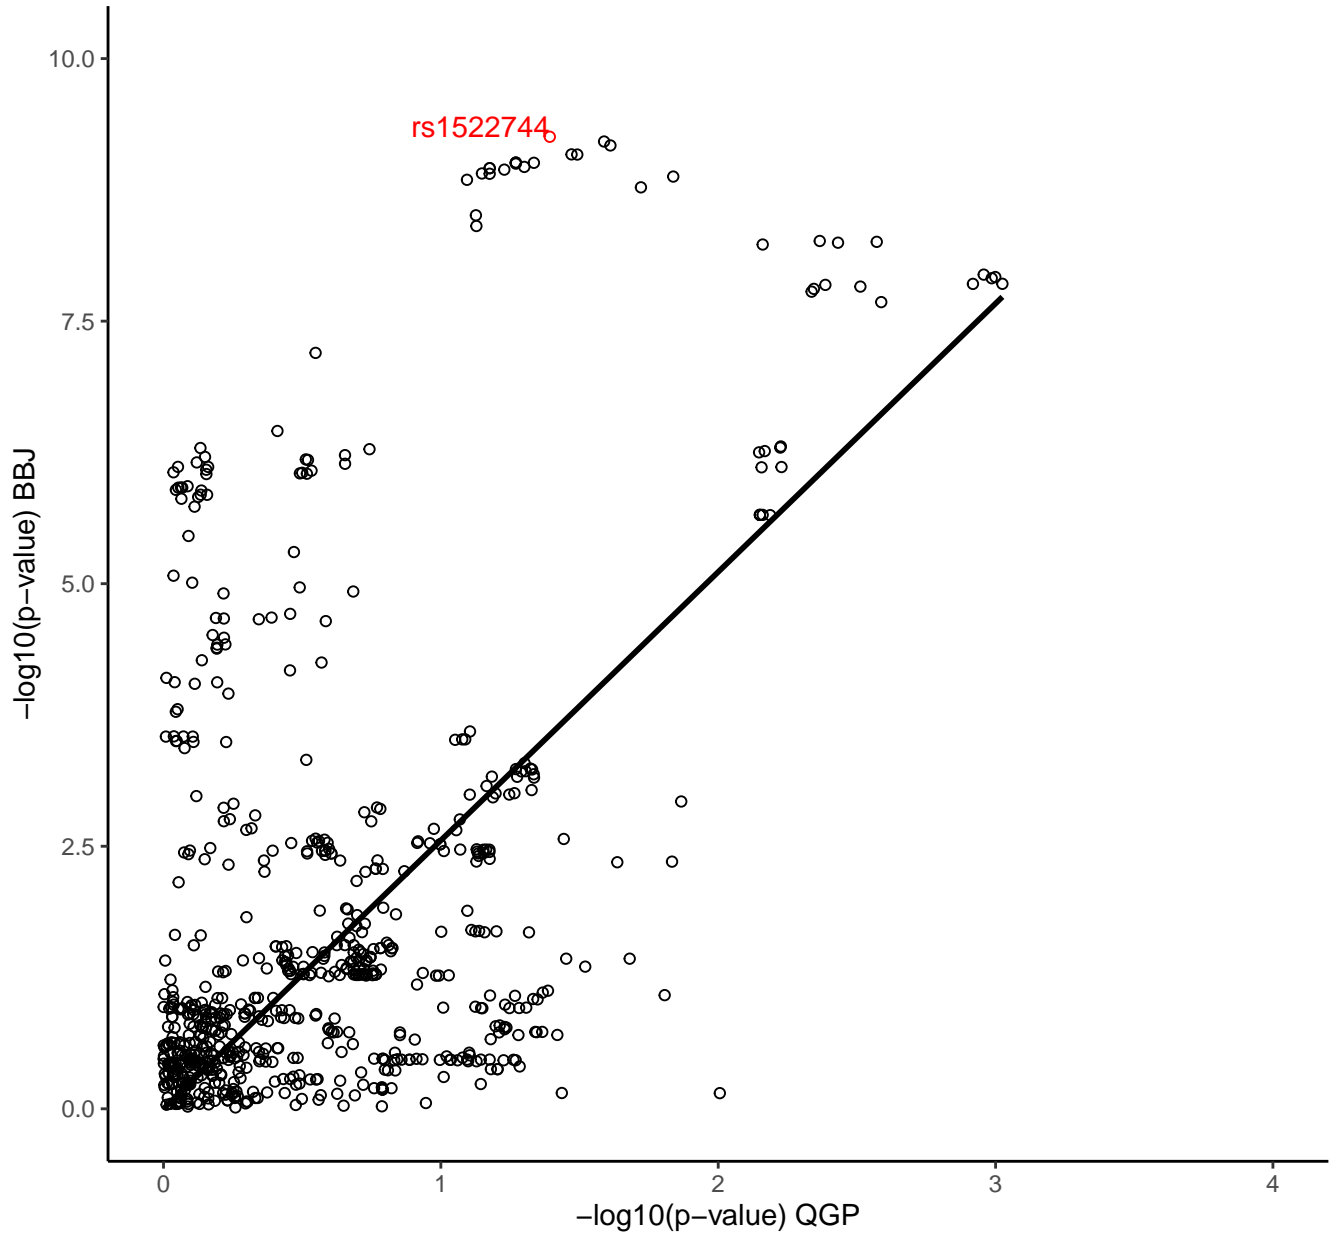

WBC rs60980157

nSNPs = 1190; H2: 0.92; H3: 0.0408; H4: 0.0318

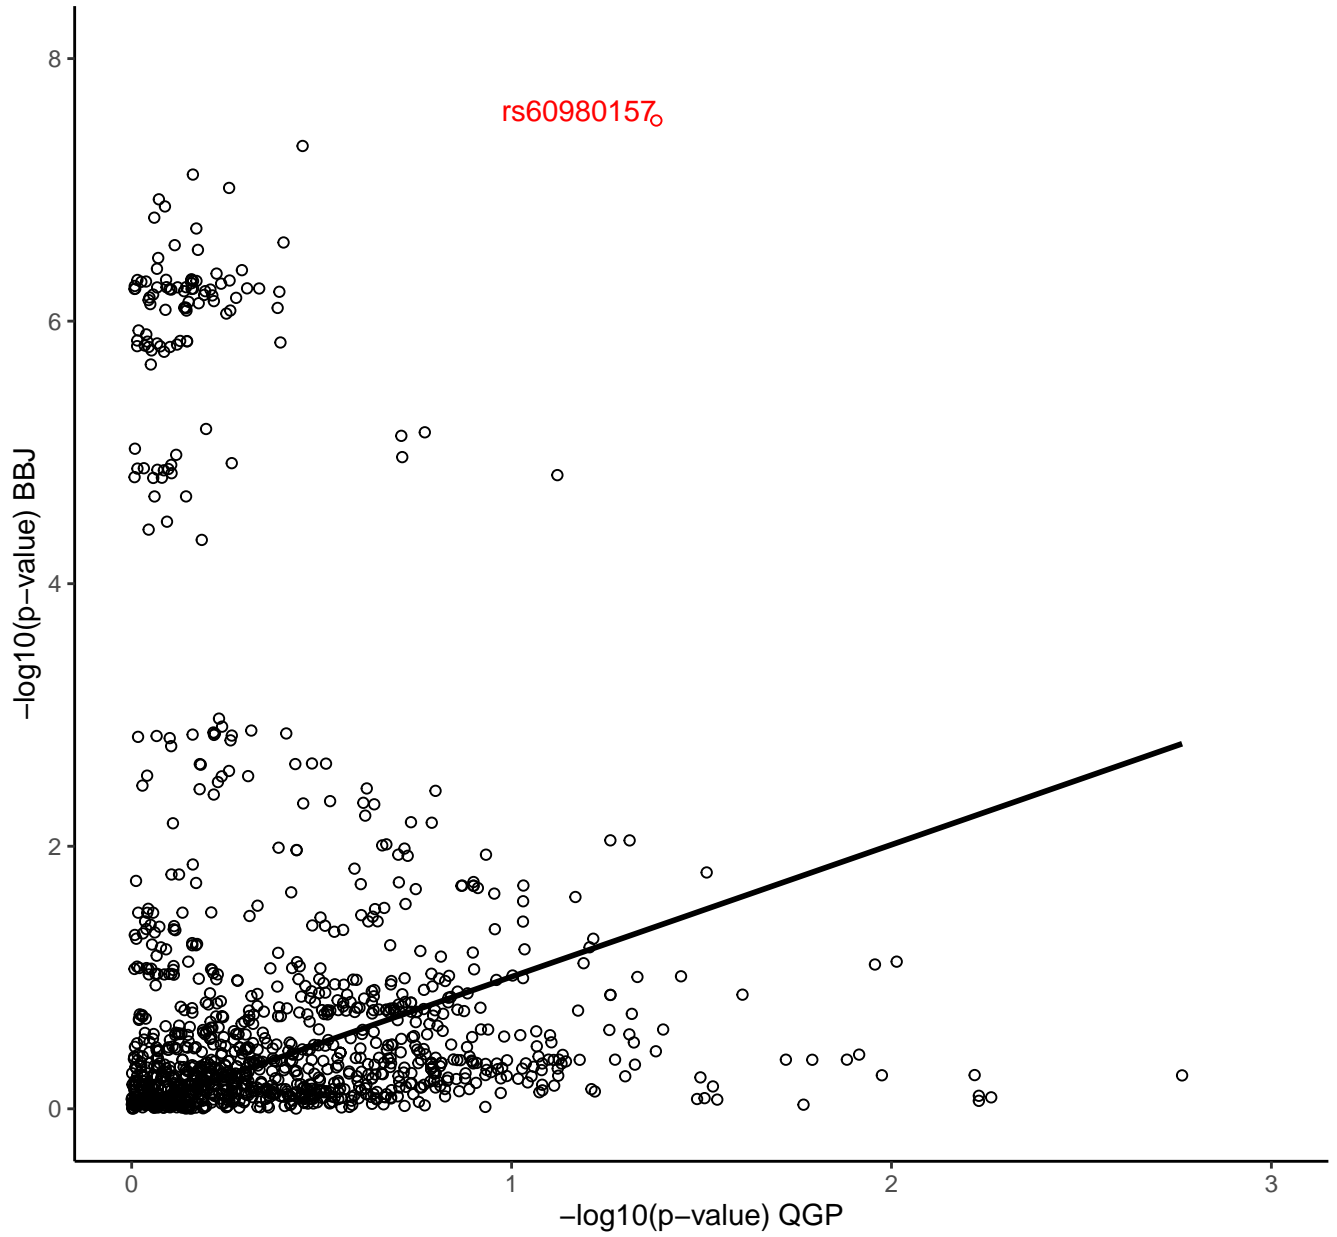

AST rs2491441

nSNPs = 1809; H2: 0.736; H3: 0.126; H4: 0.138

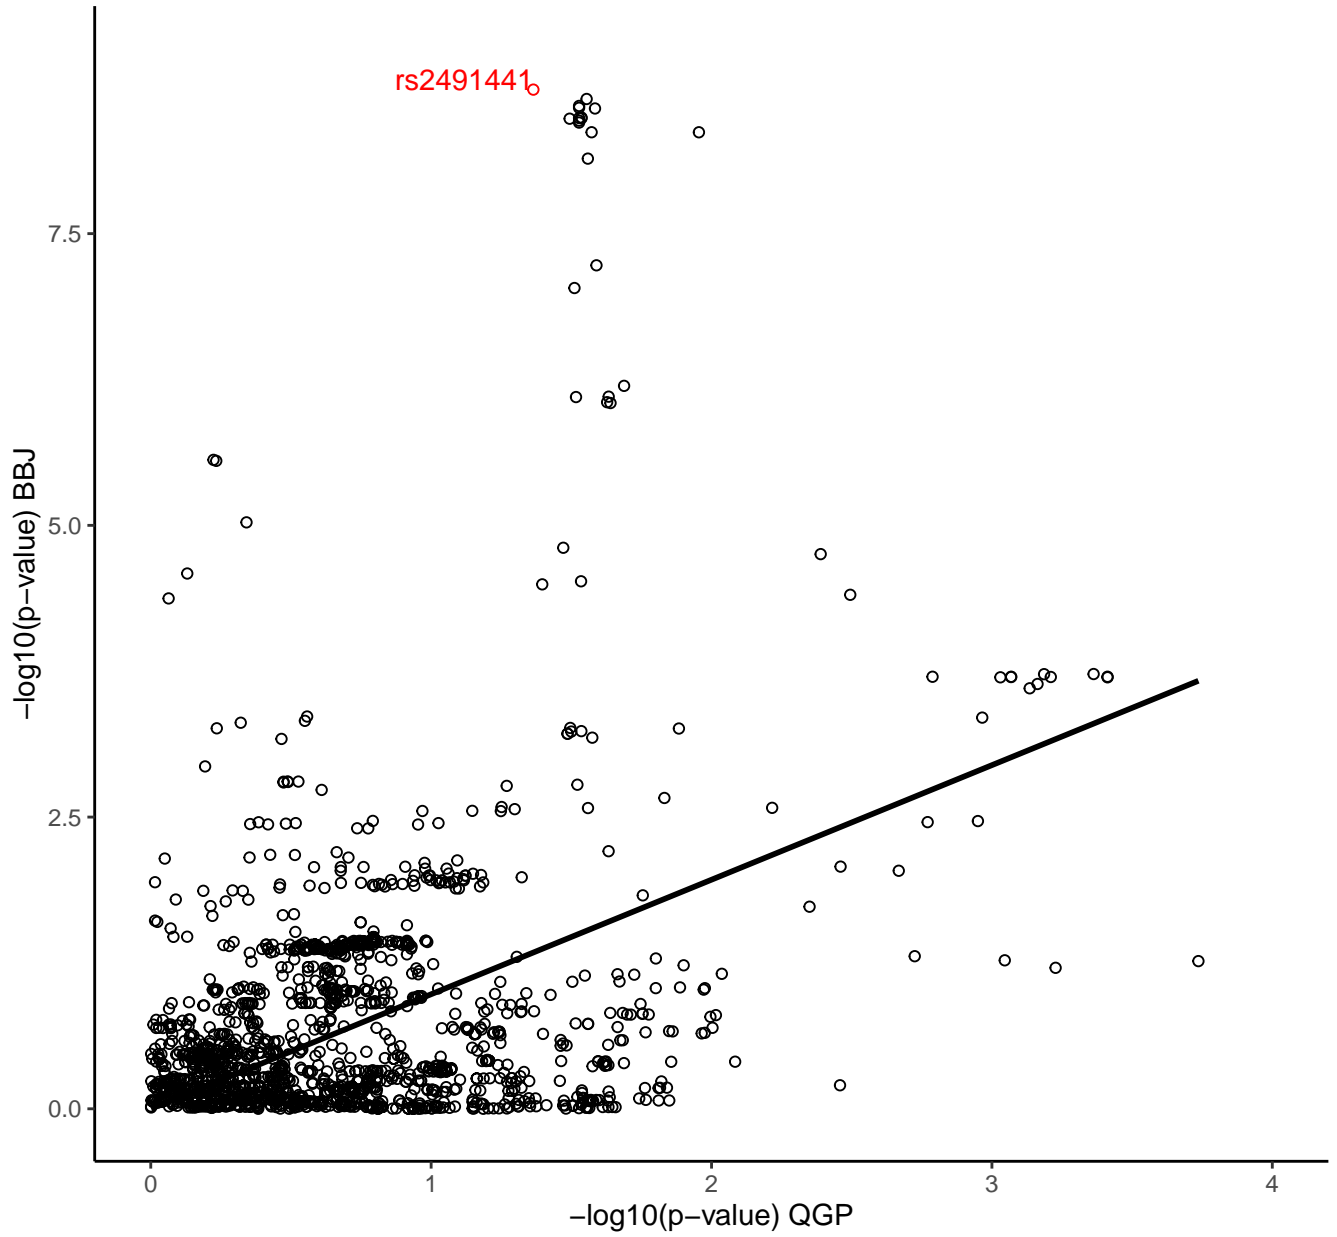



### RBC rs62410539

nSNPs = 1247; H2: 0.892; H3: 0.0752; H4: 0.0324

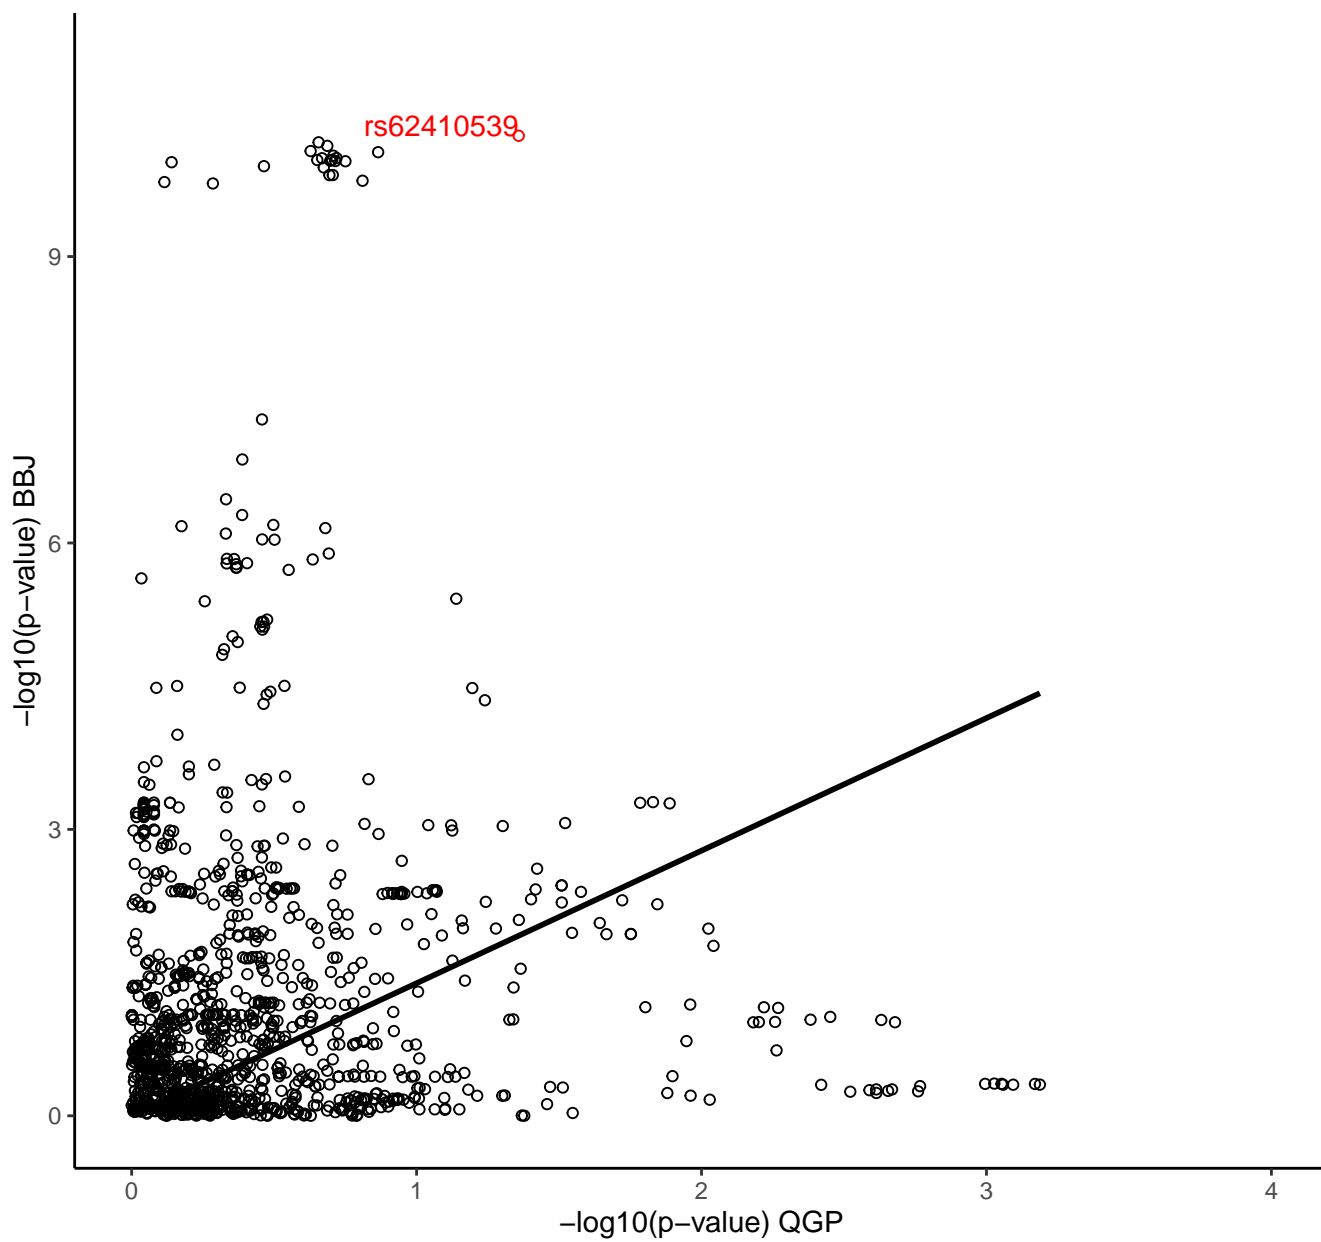

GGT rs2682302

nSNPs = 2191; H2: 0.83; H3: 0.0745; H4: 0.0934

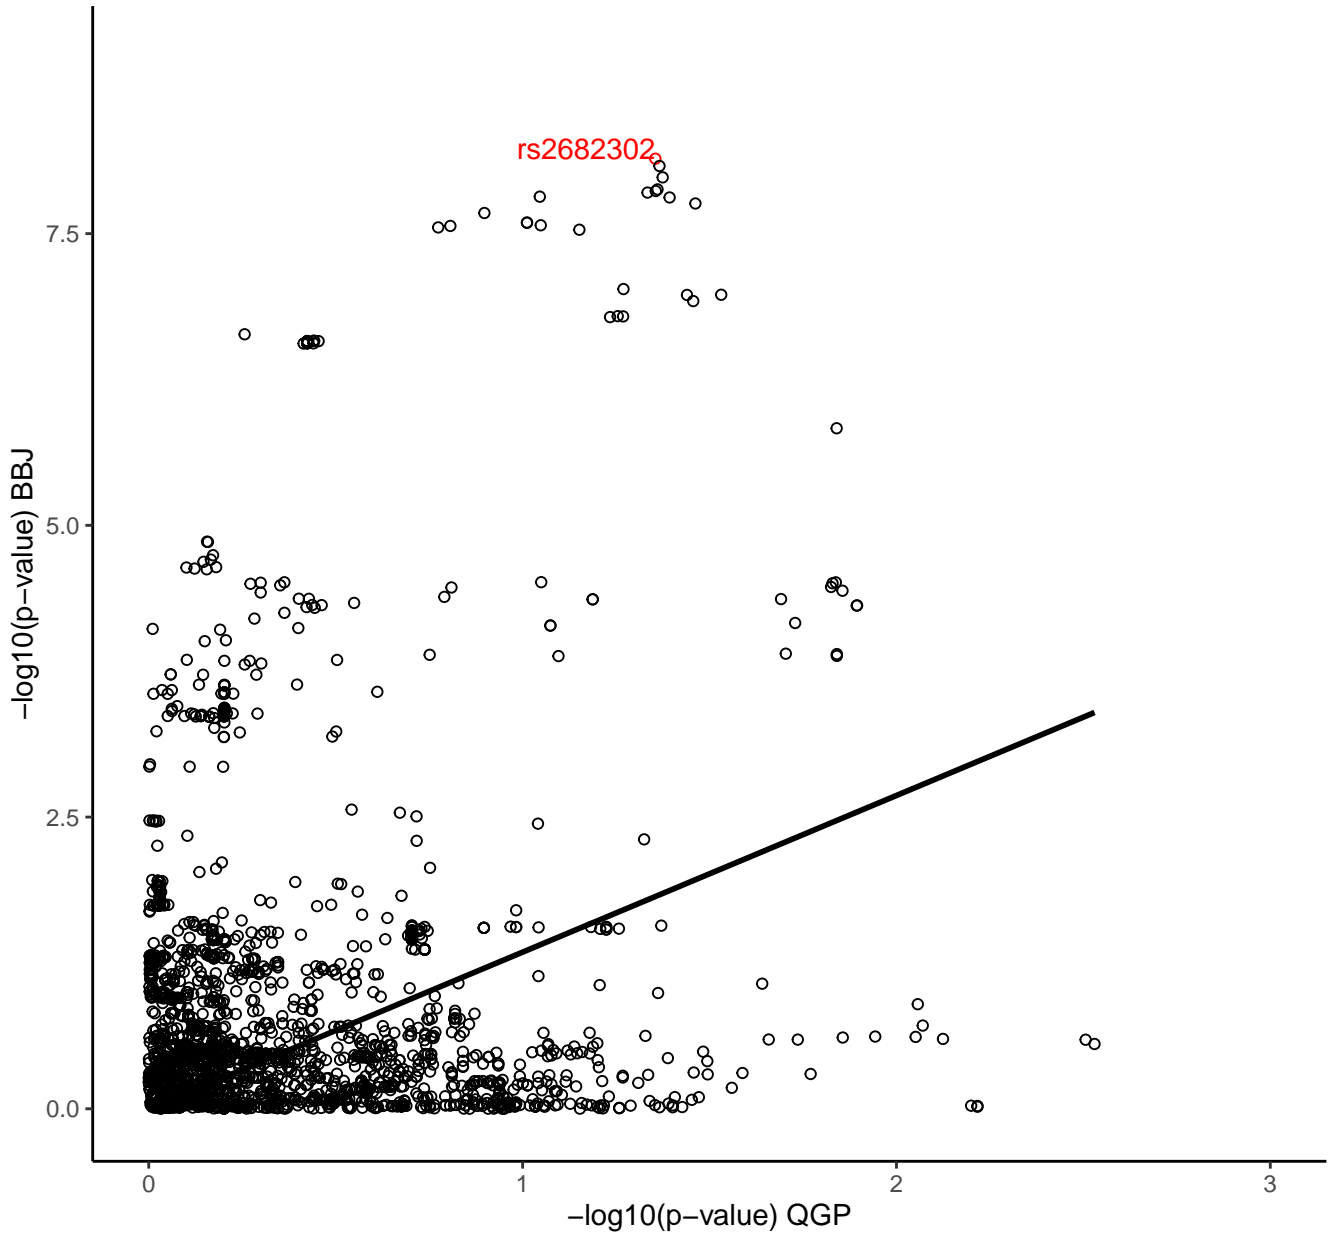

# GGT rs235314

nSNPs = 2195; H2: 0.842; H3: 0.0684; H4: 0.0819

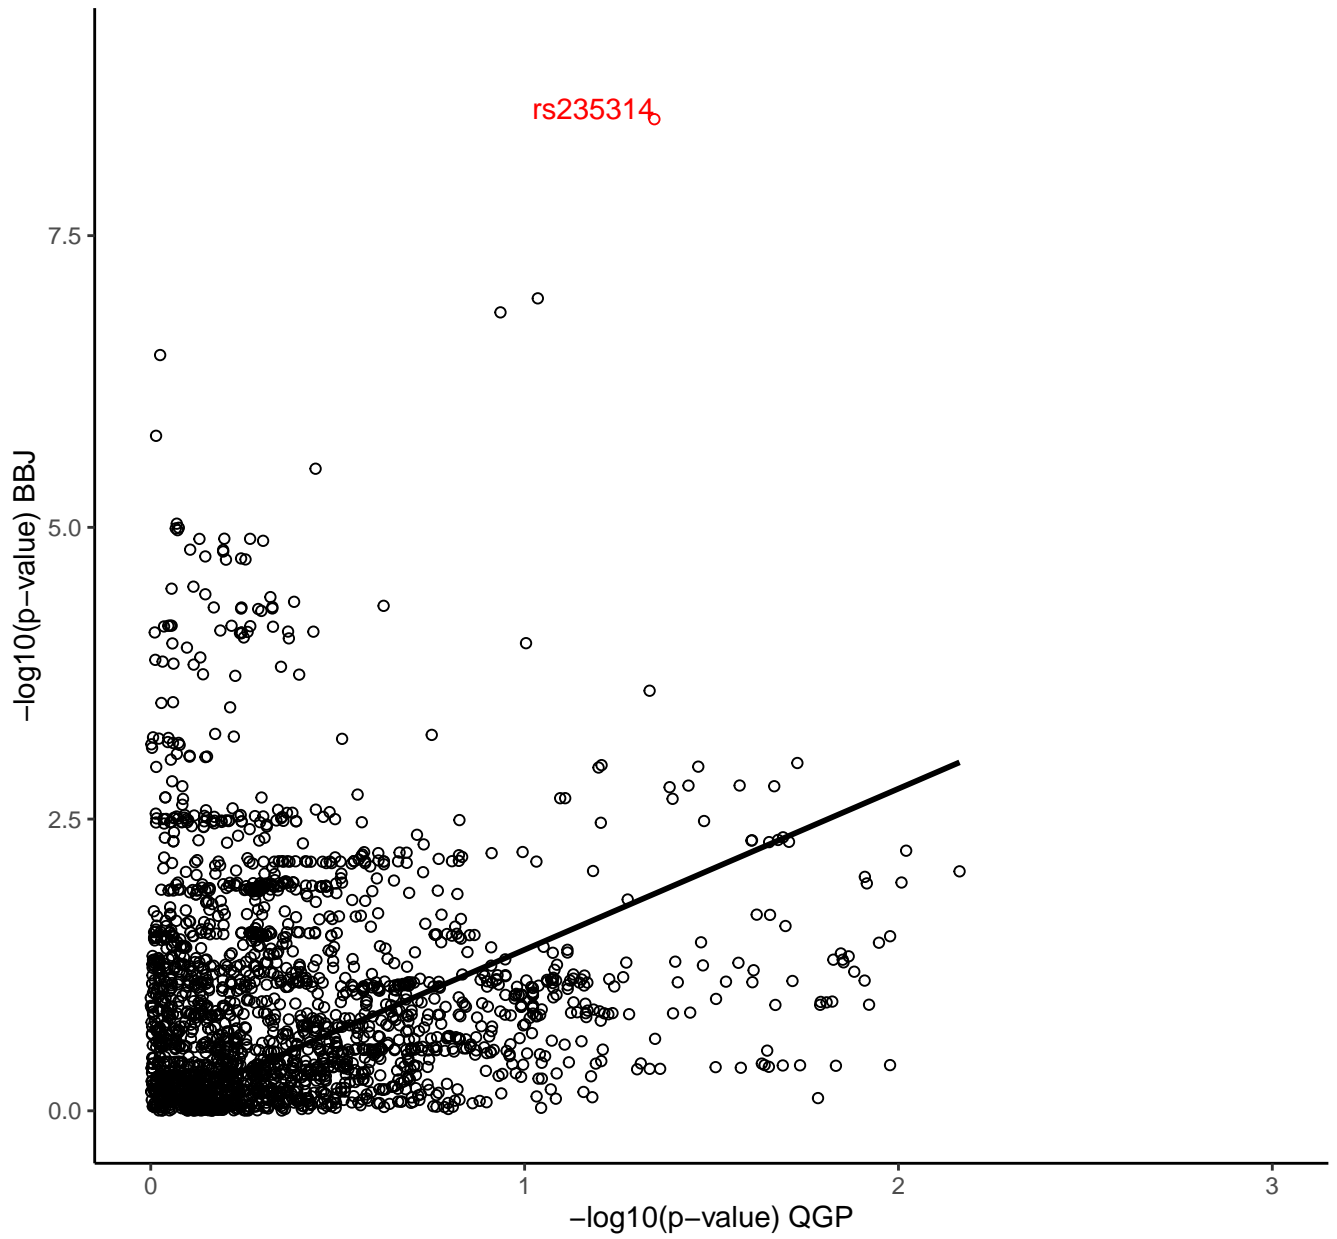

MCHC rs34664

nSNPs = 1499; H2: 0.778; H3: 0.115; H4: 0.104

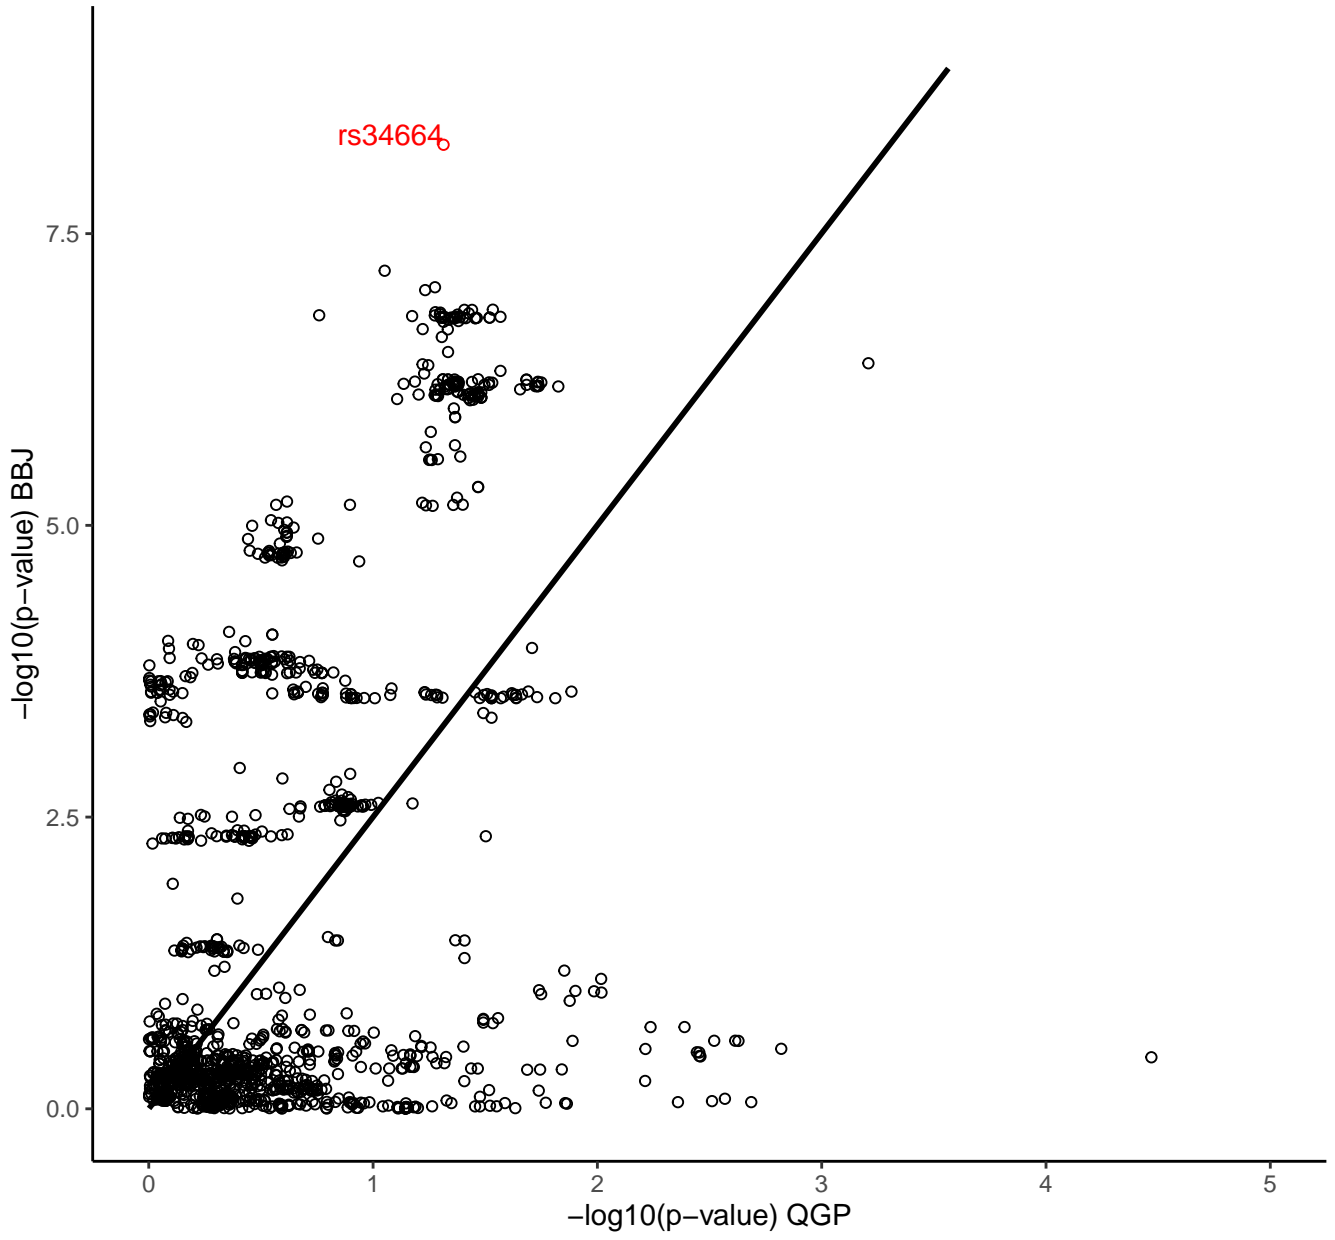

Supplement: 41467_2021_21381_MOESM7_ESM.pdf [file 41467_2021_21381_MOESM7_ESM.pdf]
