# Supplementary material for: Whole genome sequencing in the Middle Eastern Qatari population identifies genetic associations with 45 clinically relevant traits
Source: PubMed Central journal article supplement (PMC7902658; doi:10.1038/s41467-021-21381-3), 2021-02-23

**Supplementary Data 6. Regional association plots for the novel loci identified in this study.** The chromosomal positions of variants are plotted against  $-\log_{10}(P)$ . P-values obtained from GWAS analysis of QGP data using linear mixed models adjusting for age, sex, population principal components and relatedness. Variants are colored based on linkage disequilibrium with the lead variant (diamond shape). Blue lines represent recombination rate.

## Index

| Trait   | Variant ID  | Page |
|---------|-------------|------|
| Hcyst   | rs147242481 | 2    |
| Hcyst   | rs187169250 | 2    |
| Hcyst   | rs71469261  | 2    |
| INR     | rs865897814 | 2    |
| Mg      | rs189260309 | 2    |
| PT      | rs865897814 | 2    |
| Tbil    | rs2204511   | 3    |
| Tbil    | rs182021046 | 3    |
| Tbil    | rs183884248 | 3    |
| TG      | rs376997679 | 3    |
| UA      | rs143909619 | 3    |
| Vit-B12 | rs143522487 | 3    |
| WBC     | rs12080243  | 4    |
| WBC     | rs11809289  | 4    |
| WBC     | rs76537384  | 4    |
| WBC     | rs6677720   | 4    |
| WBC     | rs143969748 | 4    |

### Hcyst

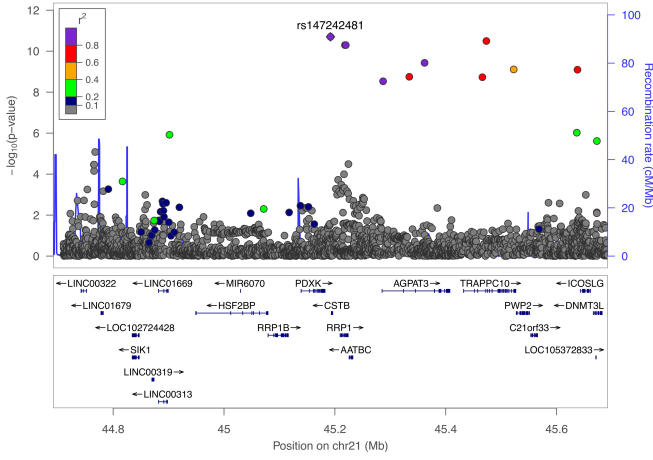

### Hcyst

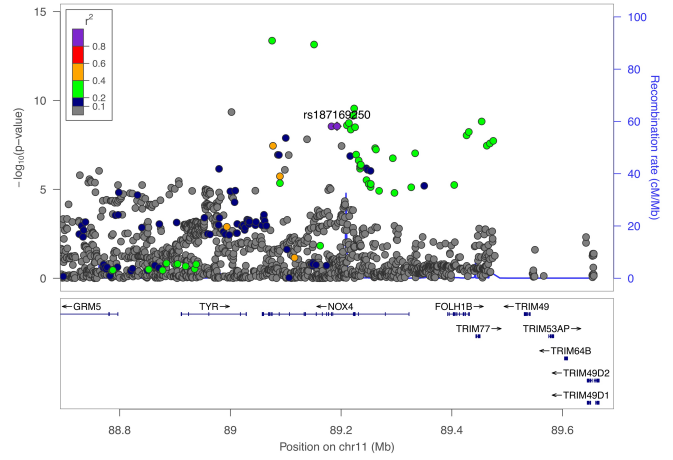

### Hcyst

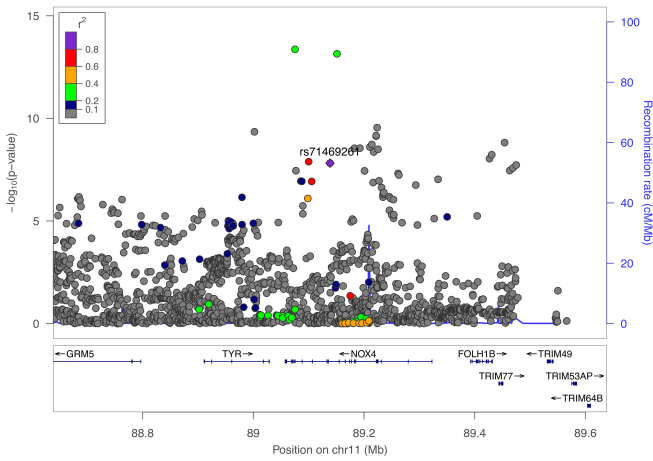

### INR

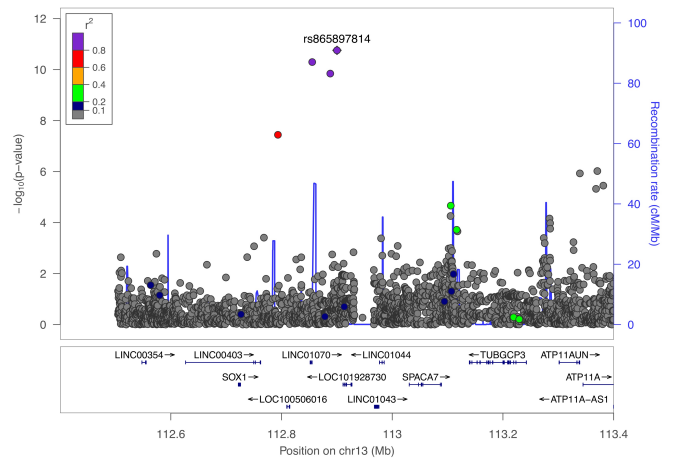

### Mg

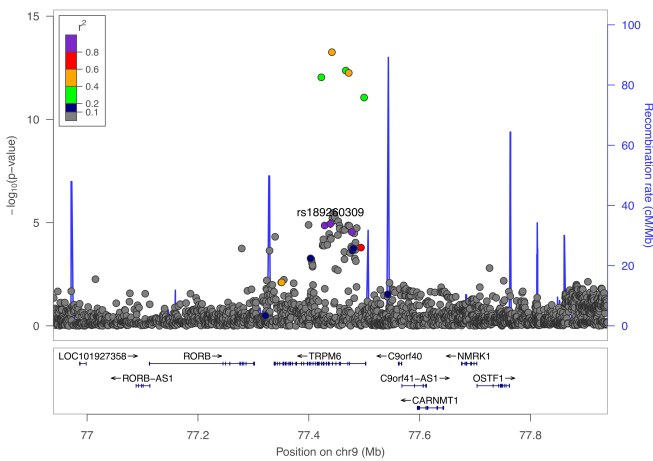

### PT

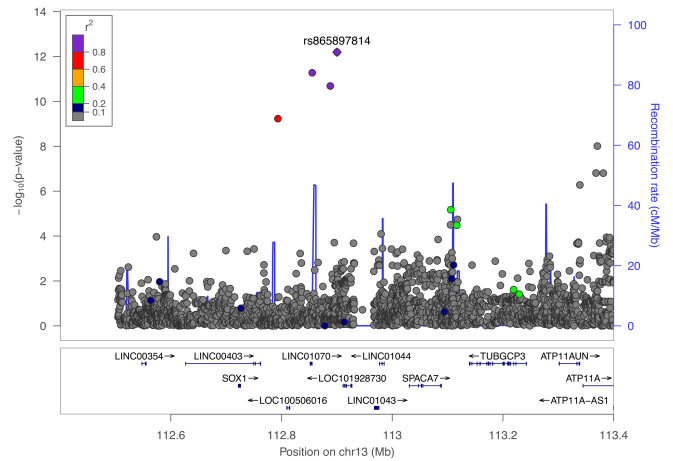

### Tbil

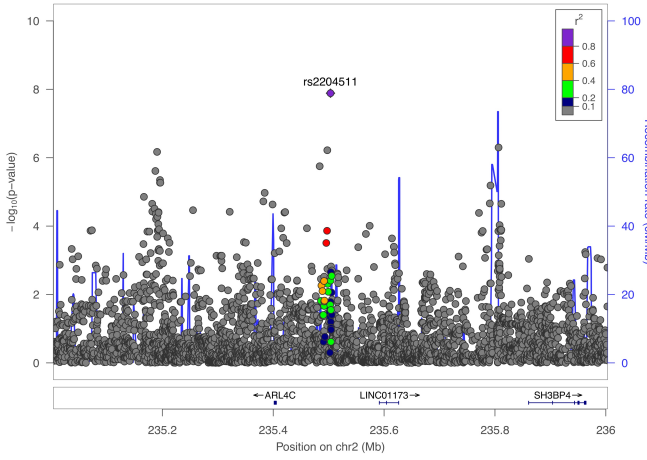

### Tbil

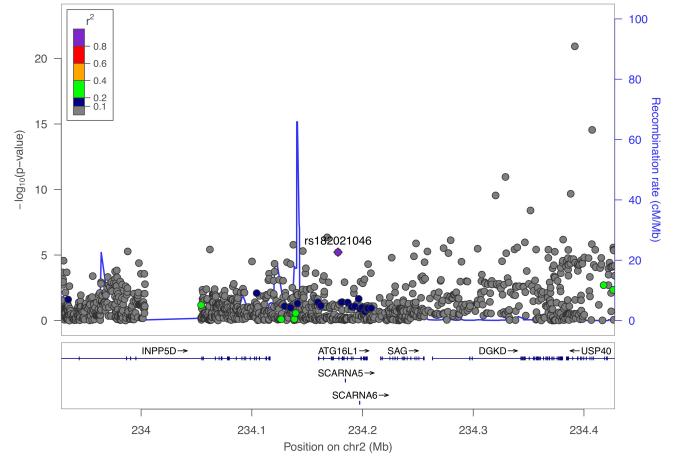

### Tbil

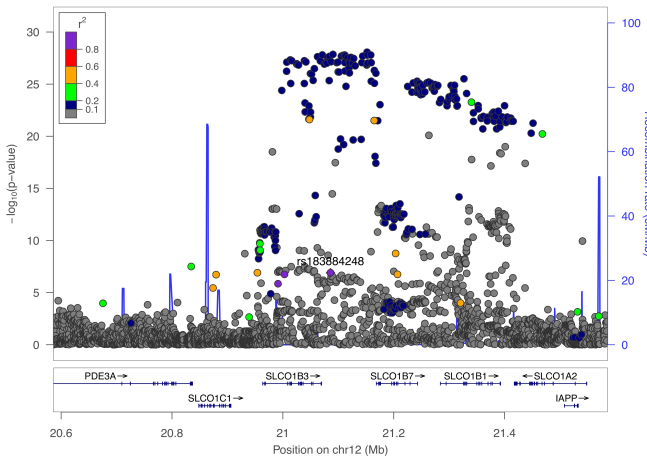

### TG

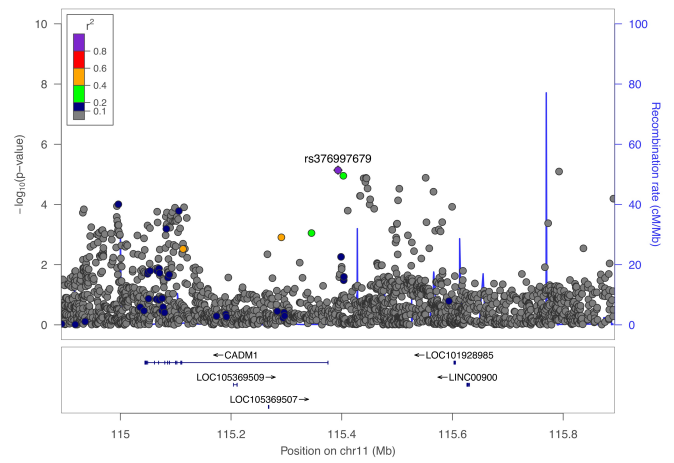

### UA

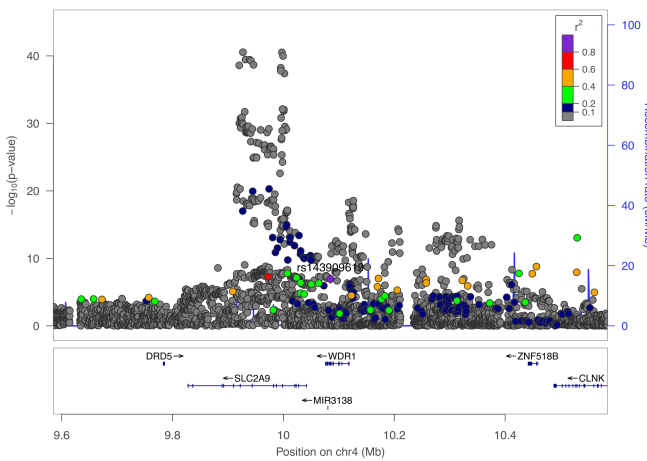

### Vit-B12

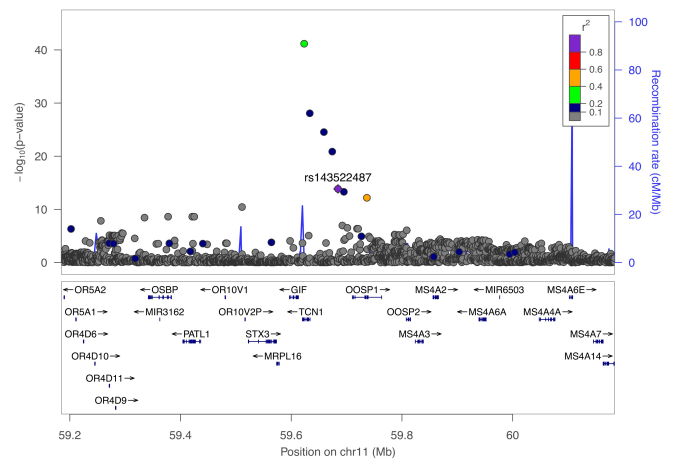

### WBC

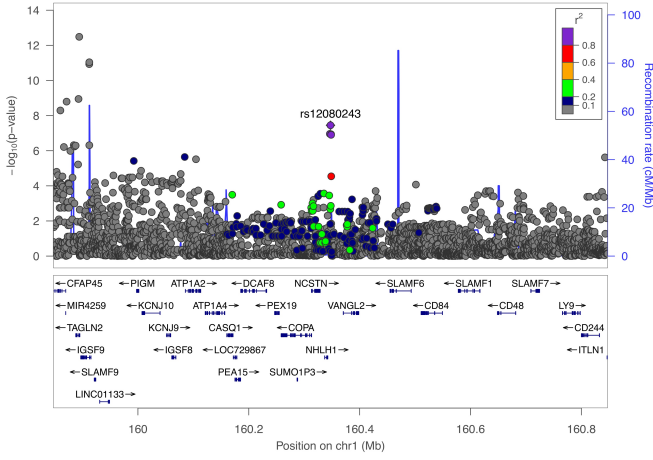

### WBC

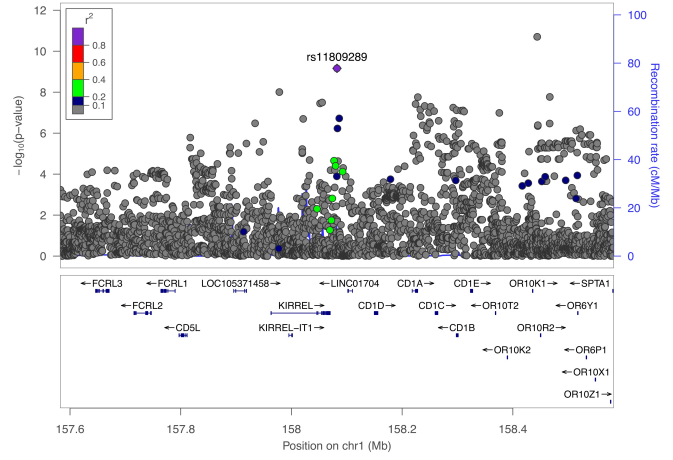

### WBC

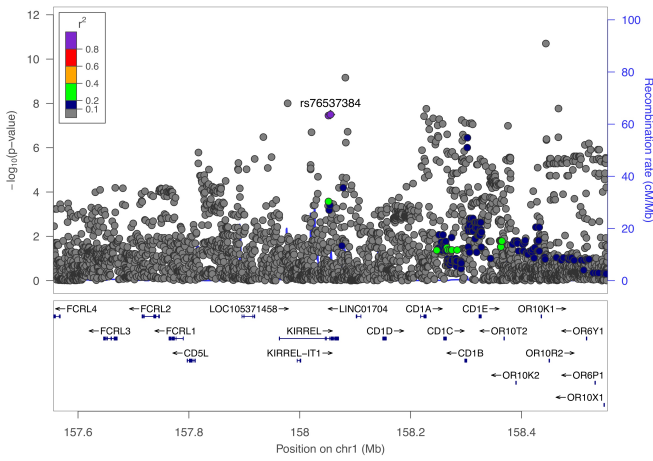

### WBC

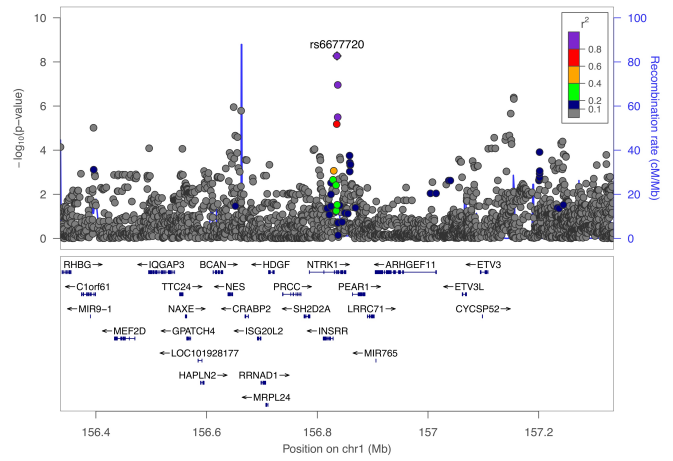

### WBC

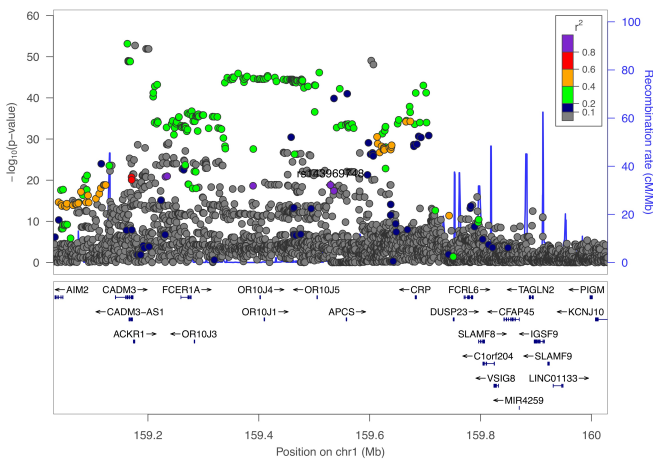

Supplement: 41467_2021_21381_MOESM8_ESM.pdf [file 41467_2021_21381_MOESM8_ESM.pdf]
