# Supplementary material for: Whole genome sequencing in the Middle Eastern Qatari population identifies genetic associations with 45 clinically relevant traits
Source: PubMed Central journal article supplement (PMC7902658; doi:10.1038/s41467-021-21381-3), 2021-02-23
Supplement: 41467_2021_21381_MOESM1_ESM.pdf [file 41467_2021_21381_MOESM1_ESM.pdf]

## Supplementary Information

### Whole genome sequencing in the Middle Eastern Qatari population identifies genetic associations with 45 clinically relevant traits.

Gaurav Thareja<sup>1,19</sup>, Yasser Al-Sarraj<sup>2,3,19</sup>, Aziz Belkadi<sup>1,4</sup>, Maryam Almotawa<sup>2,3</sup>, The Qatar Genome Program Research (QGPR) Consortium\*, Karsten Suhre<sup>1,4,20</sup> & Omar M.E. Albagha<sup>2,3,5,20</sup>

---

<sup>1</sup>Bioinformatics Core, Weill Cornell Medicine-Qatar, Education City, 24144 Doha, Qatar

<sup>2</sup>College of Health and Life Sciences, Hamad Bin Khalifa University, Doha, Qatar

<sup>3</sup>Qatar Biomedical Research Institute (QBRI), Hamad Bin Khalifa University, Doha, Qatar

<sup>4</sup>Department of Biophysics and Physiology, Weill Cornell Medicine, New York, U.S.A.

<sup>5</sup>Centre for Genomic and Experimental Medicine, Institute of Genetics and Molecular Medicine, University of Edinburgh, Edinburgh, UK

<sup>19</sup>These authors contributed equally: Gaurav Thareja, Yasser Al-Sarraj

<sup>20</sup>These authors jointly supervised this work: Karsten Suhre, Omar M. E. Albagha,

\*A list of authors and their affiliations appears at the end of the paper.

email: [kas2049@qatar-med.cornell.edu](mailto:kas2049@qatar-med.cornell.edu); [oalbagha@hbku.edu.qa](mailto:oalbagha@hbku.edu.qa)

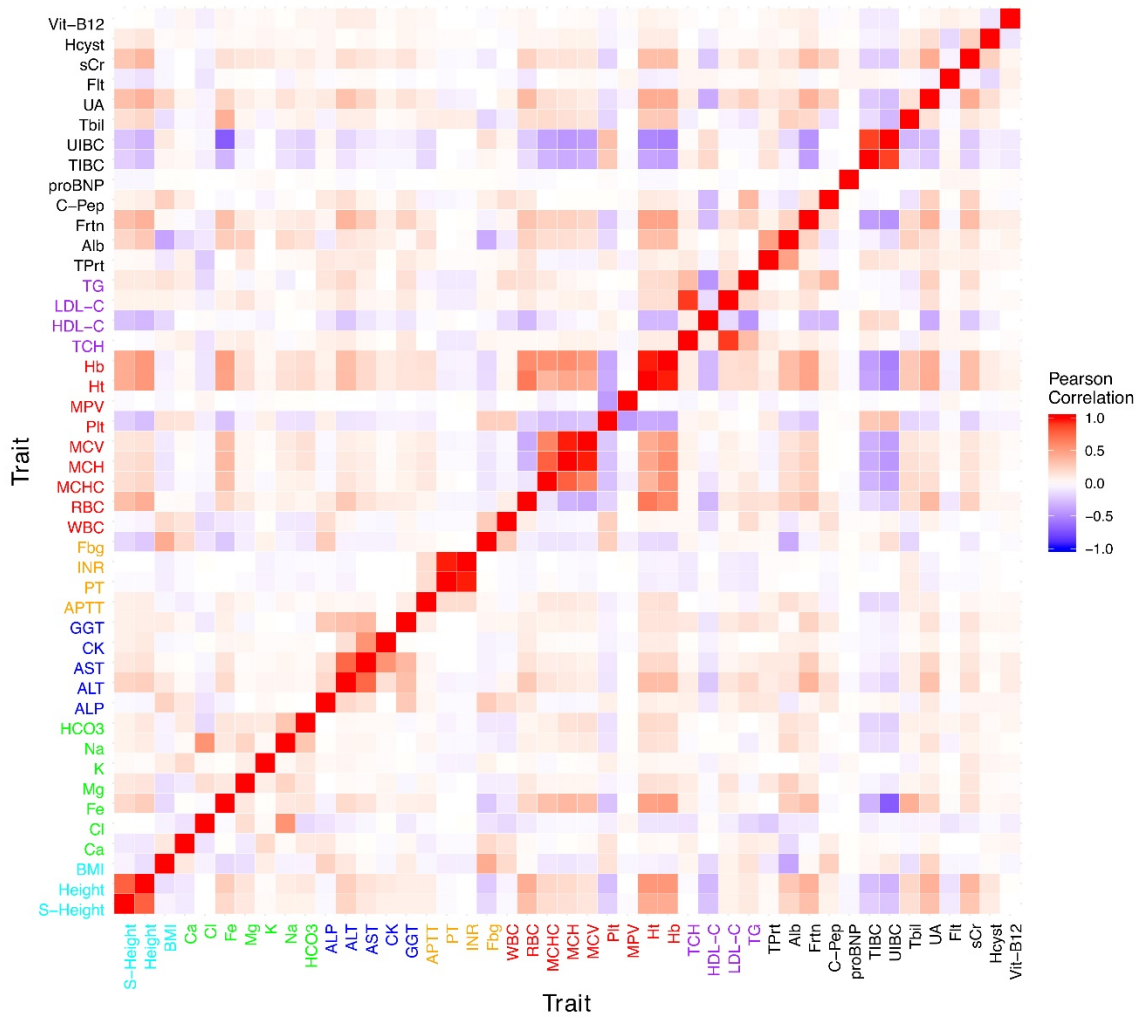

**Supplementary Fig. 1** Pairwise correlations between 45 clinically relevant quantitative traits. Positive correlations are shown in red, while negative correlations are in blue.

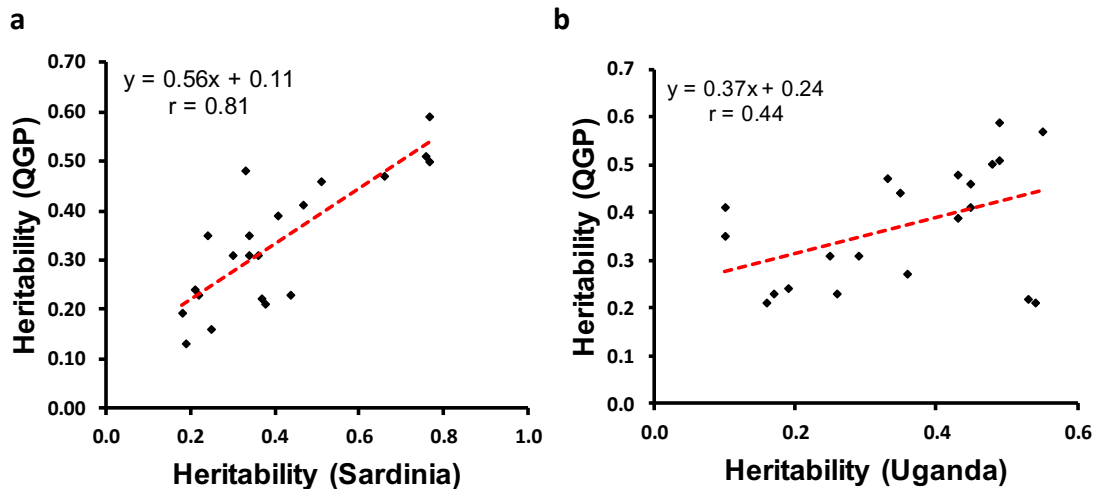

**Supplementary Fig. 2** Correlation of heritability estimates between QGP and European (a) or African (b) populations. Linear regression equations and correlation coefficient  $r$  are shown in the top left corner. Dotted red line represents the line of best fit from regression analysis.

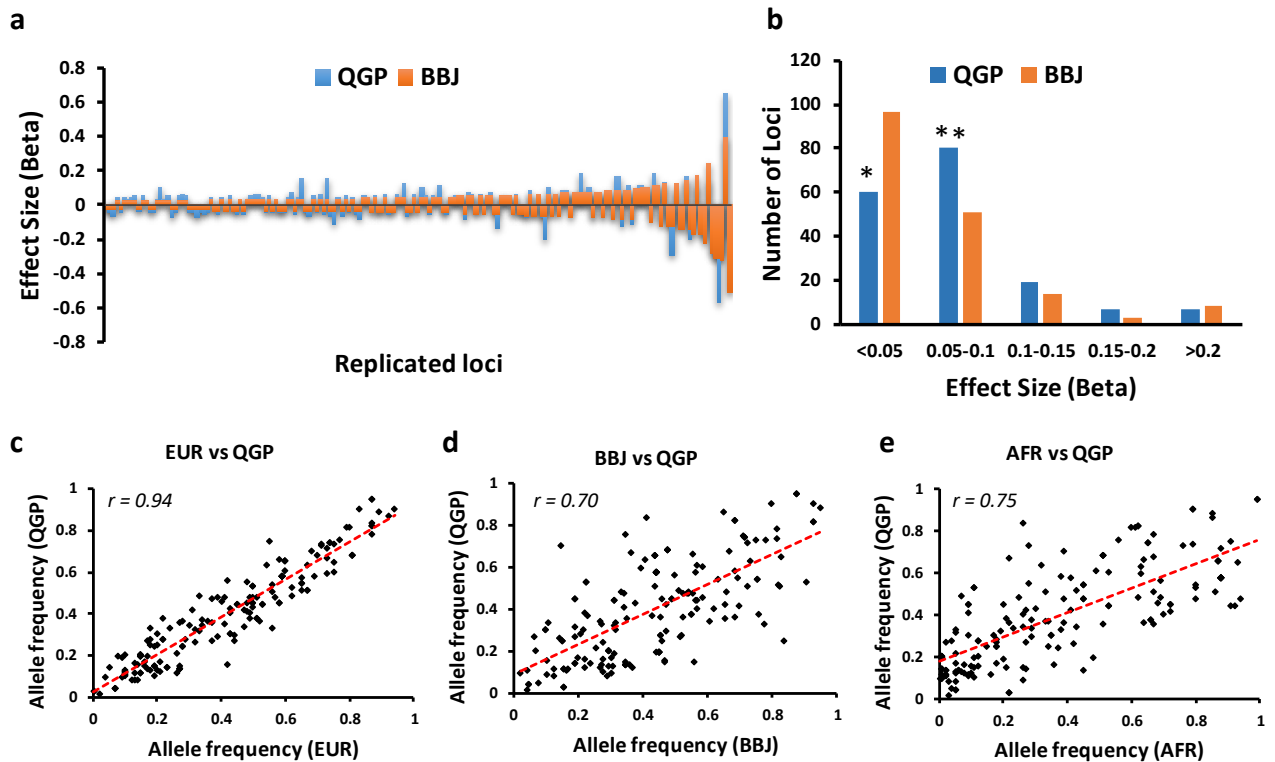

**Supplementary Fig. 3. Comparison of effect size and allele frequency for loci showing nominal replication ( $P < 0.05$ ) in QGP compared to Biobank Japan project (BBJ) data (Kani et al, 2018). (a) variant-level effect size (beta) comparison between QGP and BBJ. (b) Distribution of replicated loci grouped by effect size in QGP compared to BBJ using chi-square test. (c,d) Correlation of allele frequency of replicated loci between QGP and European (c), BBJ (d) and African (e) populations. Dotted red line indicates line of best fit from linear regression. \* $P = 2.7 \times 10^{-5}$ ; \*\* $P = 6.0 \times 10^{-4}$ .**

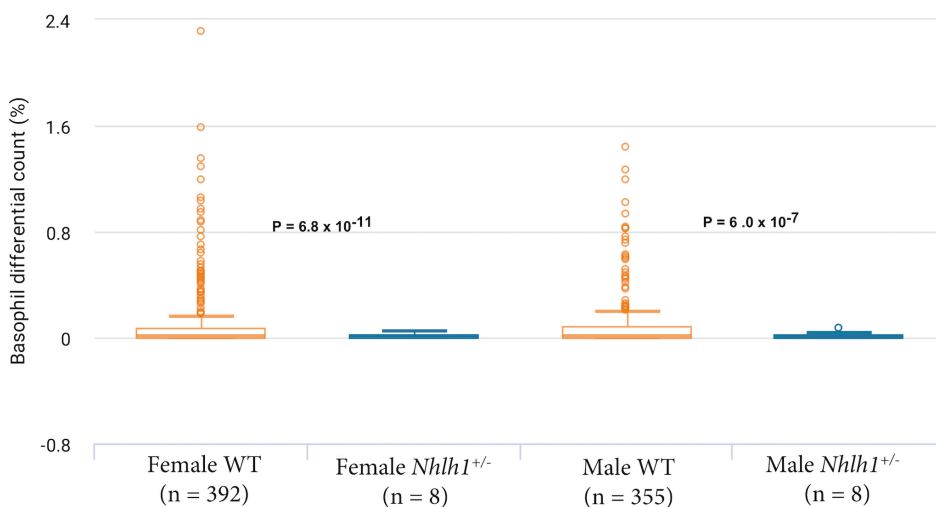

**Supplementary Fig. 4. Basophil white blood cell count in *Nhlh1*<sup>+/-</sup> mice. The genotype level P-value was  $P = 3.1 \times 10^{-17}$ . Analysis was performed using linear models. Data are presented as box and whiskers plots with median and interquartile range (IQR) and outliers (single points). Error bars represent minimum (Lower quartile - 1.5 x IQR) and maximum (upper quartile + 1.5 x IQR). Figure was adapted from the International Mouse Phenotyping Consortium (IMPC). <https://www.mousephenotype.org>.**

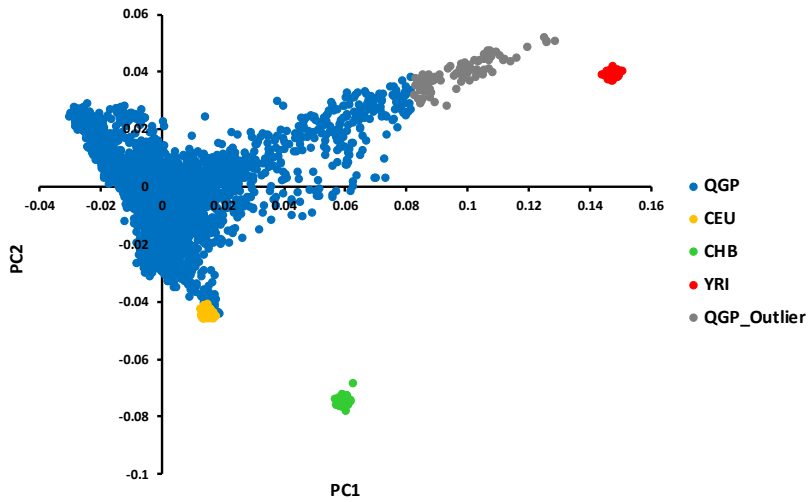

**Supplementary Fig. 5. Multi-dimensional scaling results showing population clusters of QGP compared to other populations.** The first component (PC1) is plotted against the second component (PC2). Population outliers (shown in grey) were removed before analysis. The HapMap European (CEU), East Asian (CHB), and African (YRI) populations were used as a reference.

**Supplementary Table 1. Descriptive statistics for traits investigated in this study**

| Category          | Trait                                     | Abbreviation     | Number | Mean   | SD     | Unit                    |
|-------------------|-------------------------------------------|------------------|--------|--------|--------|-------------------------|
| Anthropometric    | Sitting height                            | S-Height         | 6034   | 86.19  | 4.80   | cm                      |
|                   | Height                                    | Height           | 6044   | 163.90 | 9.38   | cm                      |
|                   | Body mass index                           | BMI              | 6039   | 29.40  | 6.04   | kg/m <sup>2</sup>       |
| Electrolyte       | Calcium                                   | Ca               | 6020   | 2.29   | 0.08   | mmol/L                  |
|                   | Chloride                                  | Cl               | 6018   | 101.13 | 2.33   | mmol/L                  |
|                   | Iron                                      | Fe               | 6010   | 14.77  | 6.25   | μmol/L                  |
|                   | Magnesium                                 | Mg               | 5996   | 0.83   | 0.07   | mmol/L                  |
|                   | Potassium                                 | K                | 6017   | 4.32   | 0.32   | mmol/L                  |
|                   | Sodium                                    | Na               | 6018   | 140.37 | 2.25   | mmol/L                  |
|                   | Bicarbonate                               | HCO <sub>3</sub> | 6017   | 26.02  | 2.19   | mmol/L                  |
| Enzymes           | Alkaline phosphatase                      | ALP              | 6012   | 70.50  | 20.94  | U/L                     |
|                   | Alanine aminotransferase                  | ALT              | 6018   | 22.60  | 16.96  | U/L                     |
|                   | Aspartate aminotransferase                | AST              | 6018   | 19.61  | 10.38  | U/L                     |
|                   | Creatine kinase                           | CK               | 5344   | 128.08 | 303.88 | U/L                     |
|                   | Gamma glutamyl transferase                | GGT              | 4650   | 28.24  | 28.28  | U/L                     |
| Coagulation       | Activated partial thromboplastin time     | APTT             | 5988   | 34.40  | 3.43   | Seconds                 |
|                   | Prothrombin time                          | PT               | 5989   | 11.78  | 2.06   | Seconds                 |
|                   | International normalization ratio         | INR              | 5987   | 1.05   | 0.18   | --                      |
|                   | Fibrinogen                                | Fbg              | 5984   | 3.33   | 0.70   | g/L                     |
| Blood Cells       | White blood cell count                    | WBC              | 6007   | 6.72   | 1.95   | 10 <sup>3</sup> Cell/μl |
|                   | Red blood cell count                      | RBC              | 6007   | 4.94   | 0.57   | 10 <sup>6</sup> Cell/μl |
|                   | Mean corpuscular hemoglobin concentration | MCHC             | 6007   | 33.15  | 1.07   | g/dL                    |
|                   | Mean corpuscular hemoglobin               | MCH              | 6007   | 27.32  | 2.94   | pg/Cell                 |
|                   | Mean corpuscular volume                   | MCV              | 6007   | 82.28  | 7.18   | Femtoliters             |
|                   | Platelet count                            | Plt              | 5935   | 246.51 | 62.96  | 10 <sup>3</sup> Cell/μl |
|                   | Mean platelet volume                      | MPV              | 6006   | 9.09   | 0.94   | Femtoliters             |
|                   | Hematocrit                                | Ht               | 6007   | 40.56  | 4.74   | %                       |
|                   | Hemoglobin                                | Hb               | 6006   | 13.46  | 1.76   | g/dL                    |
| Lipids            | Total cholesterol                         | TCH              | 6017   | 4.94   | 0.97   | mmol/L                  |
|                   | High density lipoprotein cholesterol      | HDL-C            | 6013   | 1.38   | 0.38   | mmol/L                  |
|                   | Low density lipoprotein cholesterol       | LDL-C            | 5972   | 2.96   | 0.89   | mmol/L                  |
|                   | Triglycerides                             | TG               | 6017   | 1.36   | 0.91   | mmol/L                  |
| Other biochemical | Total protein                             | TPrt             | 6017   | 73.03  | 3.86   | g/L                     |
|                   | Albumin                                   | Alb              | 6018   | 44.94  | 2.89   | g/L                     |
|                   | Ferritin                                  | Frtn             | 5947   | 70.88  | 82.74  | μg/L                    |
|                   | C-peptide                                 | C-Pep            | 5925   | 2.54   | 1.71   | ng/mL                   |
|                   | Pro B-type natriuretic peptide            | proBNP           | 5516   | 36.35  | 78.66  | pg/mL                   |
|                   | Total iron binding capacity               | TIBC             | 6010   | 61.23  | 9.76   | μmol/L                  |
|                   | Unsaturated iron binding capacity         | UIBC             | 5956   | 46.42  | 13.13  | μmol/L                  |
|                   | Total bilirubin                           | Tbil             | 6018   | 7.38   | 4.61   | μmol/L                  |
|                   | Uric acid                                 | UA               | 6013   | 294.01 | 80.72  | μmol/L                  |
|                   | Folate                                    | Flt              | 5944   | 23.01  | 7.84   | nmol/L                  |
|                   | Serum creatinine                          | sCr              | 6018   | 66.24  | 21.71  | μmol/L                  |
|                   | Homocysteine                              | Hcyst            | 5727   | 8.96   | 4.45   | μmol/L                  |
|                   | Vitamin B12                               | Vit-B12          | 5865   | 294.44 | 157.73 | pmol/L                  |

**Supplementary Table 2. Comparison of adjusted heritability between QGP and other populations**

| Trait  | QGP <sup>1</sup>      |      | Uganda <sup>2</sup>   |      | Sardinia <sup>3</sup> |      | <i>P</i> value <sup>4</sup> |                 |
|--------|-----------------------|------|-----------------------|------|-----------------------|------|-----------------------------|-----------------|
|        | <i>h</i> <sup>2</sup> | SE   | <i>h</i> <sup>2</sup> | SE   | <i>h</i> <sup>2</sup> | SE   | QGP vs Uganda               | QGP vs Sardinia |
| Height | 0.59                  | 0.03 | 0.49                  | 0.05 | 0.77                  | 0.02 | 8.64E-02                    | <b>6.05E-07</b> |
| BMI    | 0.31                  | 0.03 | 0.29                  | 0.05 | 0.36                  | 0.02 | 7.32E-01                    | 1.66E-01        |
| Fe     | 0.13                  | 0.03 | NA                    | NA   | 0.19                  | 0.02 | NA                          | 9.61E-02        |
| K      | 0.19                  | 0.03 | NA                    | NA   | 0.18                  | 0.02 | NA                          | 7.82E-01        |
| Na     | 0.16                  | 0.03 | NA                    | NA   | 0.25                  | 0.02 | NA                          | 1.26E-02        |
| ALP    | 0.41                  | 0.03 | 0.10                  | 0.05 | NA                    | NA   | <b>1.08E-07</b>             | NA              |
| ALT    | 0.23                  | 0.03 | 0.26                  | 0.05 | 0.22                  | 0.02 | 6.07E-01                    | 7.82E-01        |
| AST    | 0.24                  | 0.03 | 0.19                  | 0.05 | 0.21                  | 0.02 | 3.91E-01                    | 4.05E-01        |
| GGT    | 0.35                  | 0.03 | 0.10                  | 0.04 | 0.34                  | 0.02 | <b>5.84E-07</b>             | 7.82E-01        |
| Fbg    | 0.35                  | 0.03 | NA                    | NA   | 0.24                  | 0.02 | NA                          | 2.29E-03        |
| WBC    | 0.48                  | 0.03 | 0.43                  | 0.10 | 0.33                  | 0.02 | 6.32E-01                    | <b>3.20E-05</b> |
| RBC    | 0.47                  | 0.03 | 0.33                  | 0.11 | 0.66                  | 0.02 | 2.20E-01                    | <b>1.39E-07</b> |
| MCHC   | 0.44                  | 0.03 | 0.35                  | 0.09 | NA                    | NA   | 3.43E-01                    | NA              |
| MCH    | 0.50                  | 0.03 | 0.48                  | 0.12 | 0.77                  | 0.02 | 8.72E-01                    | <b>7.45E-14</b> |
| MCV    | 0.51                  | 0.03 | 0.49                  | 0.11 | 0.76                  | 0.02 | 8.61E-01                    | <b>4.31E-12</b> |
| Plt    | 0.46                  | 0.03 | 0.45                  | 0.10 | 0.51                  | 0.02 | 9.24E-01                    | 1.66E-01        |
| MPV    | 0.57                  | 0.03 | 0.55                  | 0.09 | NA                    | NA   | 8.33E-01                    | NA              |
| Ht     | 0.21                  | 0.03 | 0.16                  | 0.10 | NA                    | NA   | 6.32E-01                    | NA              |
| Hb     | 0.23                  | 0.03 | 0.17                  | 0.09 | 0.44                  | 0.02 | 5.27E-01                    | <b>5.88E-09</b> |
| TCH    | 0.22                  | 0.03 | 0.53                  | 0.05 | 0.37                  | 0.02 | <b>1.08E-07</b>             | <b>3.20E-05</b> |
| HDL-C  | 0.41                  | 0.03 | 0.45                  | 0.05 | 0.47                  | 0.02 | 4.93E-01                    | 9.61E-02        |
| LDL-C  | 0.21                  | 0.03 | 0.54                  | 0.05 | 0.38                  | 0.02 | <b>1.56E-08</b>             | <b>2.44E-06</b> |
| TG     | 0.31                  | 0.03 | 0.25                  | 0.05 | 0.30                  | 0.02 | 3.04E-01                    | 7.82E-01        |
| Alb    | 0.27                  | 0.03 | 0.36                  | 0.05 | NA                    | NA   | 1.23E-01                    | NA              |
| Tbil   | 0.39                  | 0.03 | 0.43                  | 0.04 | 0.41                  | 0.02 | 4.24E-01                    | 5.79E-01        |
| UA     | 0.31                  | 0.03 | NA                    | NA   | 0.34                  | 0.02 | NA                          | 4.05E-01        |

<sup>1</sup>Heritability was determined using the polygenic GenABEL method adjusted for age, sex, genomic kinship and the first four principal components. <sup>2</sup>Gurdasani et al. 2019. Cell 179:984-1002. <sup>3</sup>GPilia et al. 2006. PLoS Genet 8:e132.

<sup>4</sup>Comparison of heritability between populations was performed using two-tailed Z-test. Bold text indicates statistical significance after correction for multiple testing  $P < 0.002$ .

**Supplementary Table 3. Comparison of heritability between QGP and other populations**

| Trait  | QGP <sup>1</sup>      |      | Uganda <sup>2</sup>   |      | Sardinia <sup>3</sup> |      | Iceland <sup>4</sup>  |      | <i>P</i> value <sup>5</sup> |                 |                 |
|--------|-----------------------|------|-----------------------|------|-----------------------|------|-----------------------|------|-----------------------------|-----------------|-----------------|
|        | <i>h</i> <sup>2</sup> | SE   | <i>h</i> <sup>2</sup> | SE   | <i>h</i> <sup>2</sup> | SE   | <i>h</i> <sup>2</sup> | SE   | QGP vs Uganda               | QGP vs Sardinia | QGP vs Iceland  |
| Height | 0.64                  | 0.03 | 0.50                  | 0.05 | 0.80                  | 0.02 | 0.69                  | 0.02 | 1.64E-02                    | <b>9.18E-06</b> | 1.66E-01        |
| BMI    | 0.31                  | 0.03 | 0.37                  | 0.04 | 0.43                  | 0.02 | 0.42                  | 0.02 | 2.30E-01                    | <b>8.77E-04</b> | <b>2.28E-03</b> |
| Fe     | 0.14                  | 0.03 | NA                    | NA   | 0.19                  | 0.02 | NA                    | NA   | NA                          | 1.66E-01        | NA              |
| K      | 0.21                  | 0.03 | NA                    | NA   | 0.18                  | 0.02 | NA                    | NA   | NA                          | 4.05E-01        | NA              |
| Na     | 0.16                  | 0.03 | NA                    | NA   | 0.25                  | 0.02 | NA                    | NA   | NA                          | 1.26E-02        | NA              |
| ALT    | 0.24                  | 0.03 | 0.37                  | 0.05 | 0.24                  | 0.02 | NA                    | NA   | 2.58E-02                    | 1.00E+00        | NA              |
| AST    | 0.24                  | 0.03 | 0.25                  | 0.05 | 0.24                  | 0.02 | NA                    | NA   | 8.64E-01                    | 1.00E+00        | NA              |
| GGT    | 0.30                  | 0.03 | 0.11                  | 0.04 | 0.34                  | 0.02 | NA                    | NA   | <b>1.46E-04</b>             | 2.67E-01        | NA              |
| Fbg    | 0.35                  | 0.03 | NA                    | NA   | 0.27                  | 0.02 | NA                    | NA   | NA                          | 2.65E-02        | NA              |
| WBC    | 0.47                  | 0.03 | 0.44                  | 0.10 | 0.38                  | 0.02 | NA                    | NA   | 7.74E-01                    | 1.26E-02        | NA              |
| RBC    | 0.51                  | 0.03 | 0.39                  | 0.10 | 0.67                  | 0.02 | NA                    | NA   | 2.50E-01                    | <b>9.18E-06</b> | NA              |
| MCH    | 0.54                  | 0.03 | 0.53                  | 0.11 | 0.78                  | 0.02 | NA                    | NA   | 9.30E-01                    | <b>2.93E-11</b> | NA              |
| MCV    | 0.57                  | 0.03 | 0.57                  | 0.10 | 0.76                  | 0.02 | NA                    | NA   | 1.00E+00                    | <b>1.39E-07</b> | NA              |
| Plt    | 0.48                  | 0.03 | 0.48                  | 0.09 | 0.53                  | 0.02 | NA                    | NA   | 1.00E+00                    | 1.66E-01        | NA              |
| Hb     | 0.23                  | 0.03 | 0.20                  | 0.09 | 0.47                  | 0.02 | NA                    | NA   | 7.52E-01                    | <b>2.93E-11</b> | NA              |
| TCH    | 0.23                  | 0.03 | 0.60                  | 0.04 | 0.42                  | 0.02 | NA                    | NA   | <b>1.46E-13</b>             | <b>1.39E-07</b> | NA              |
| HDL-C  | 0.41                  | 0.03 | 0.51                  | 0.05 | 0.49                  | 0.02 | 0.45                  | 0.02 | 8.64E-02                    | 2.65E-02        | 2.67E-01        |
| LDL-C  | 0.22                  | 0.03 | 0.60                  | 0.05 | 0.43                  | 0.02 | 0.20                  | 0.06 | <b>7.50E-11</b>             | <b>5.88E-09</b> | 7.66E-01        |
| TG     | 0.30                  | 0.03 | 0.27                  | 0.05 | 0.32                  | 0.02 | NA                    | NA   | 6.07E-01                    | 5.79E-01        | NA              |
| Tbil   | 0.41                  | 0.03 | 0.45                  | 0.04 | 0.42                  | 0.02 | NA                    | NA   | 4.24E-01                    | 7.82E-01        | NA              |
| UA     | 0.35                  | 0.03 | NA                    | NA   | 0.34                  | 0.02 | NA                    | NA   | NA                          | 7.82E-01        | NA              |

<sup>1</sup>Heritability was determined using GCTA GREML method adjusted for age, sex, and the first four principal components

<sup>2</sup>Gurdasani et al. 2019. Cell 179:984-1002. <sup>3</sup>GPilia et al. 2006. PLoS Genet 2(8):e132. <sup>4</sup>Zaitlen et al. 2013. PLoS Genet 9(5):e1003520.

<sup>5</sup>Comparison of heritability between populations was performed using two-tailed Z-test. Bold text indicates statistical significance after correction for multiple testing *P*<0.002.

**Supplementary Table 4. Genomic inflation factor for traits.**

| Trait    | lambda | SE labmda |
|----------|--------|-----------|
| Alb      | 1.02   | 5.16E-07  |
| ALP      | 1.04   | 5.49E-07  |
| ALT      | 1.01   | 1.07E-06  |
| APTT     | 1.03   | 9.61E-07  |
| AST      | 1.01   | 4.51E-07  |
| BMI      | 1.03   | 8.01E-07  |
| Ca       | 1.01   | 1.72E-07  |
| CK       | 1.00   | 5.76E-07  |
| Cl       | 1.00   | 4.74E-07  |
| C-Pep    | 0.99   | 3.39E-07  |
| Fbg      | 1.03   | 2.93E-07  |
| Fe       | 1.00   | 2.95E-07  |
| Flt      | 1.02   | 3.86E-07  |
| Frtn     | 0.99   | 8.12E-07  |
| GGT      | 1.00   | 1.05E-06  |
| Hb       | 1.00   | 3.58E-07  |
| HCO3     | 1.02   | 6.19E-07  |
| Hcyst    | 1.01   | 1.89E-07  |
| HDL-C    | 1.04   | 3.35E-07  |
| Height   | 1.13   | 8.23E-07  |
| Ht       | 1.00   | 3.44E-07  |
| INR      | 1.02   | 2.41E-07  |
| K        | 0.99   | 8.03E-07  |
| LDL-C    | 1.00   | 4.55E-07  |
| MCH      | 1.07   | 2.95E-07  |
| MCHC     | 1.03   | 3.82E-07  |
| MCV      | 1.08   | 2.72E-07  |
| Mg       | 1.01   | 4.35E-07  |
| MPV      | 1.09   | 3.64E-07  |
| Na       | 0.99   | 8.03E-07  |
| Plt      | 1.06   | 5.86E-07  |
| proBNP   | 1.02   | 8.51E-07  |
| PT       | 1.04   | 7.59E-07  |
| RBC      | 1.07   | 4.61E-07  |
| sCr      | 1.02   | 4.54E-07  |
| S-Height | 1.08   | 2.66E-07  |
| Tbil     | 1.04   | 4.03E-07  |
| TCH      | 1.00   | 2.40E-07  |
| TG       | 1.02   | 4.85E-07  |
| TIBC     | 1.02   | 5.82E-07  |
| TPrt     | 1.04   | 4.37E-07  |
| UA       | 1.03   | 8.86E-07  |
| UIBC     | 1.01   | 2.50E-07  |
| Vit-B12  | 1.03   | 8.24E-07  |
| WBC      | 1.06   | 8.17E-07  |



**Supplementary Table 5. Performance of European-derived Polygenic scores (PGS) in QGP**

| Trait  | EFO Term    | Polygenic Score (PGS) ID | Sample size | Population | Reference     | Number of Variants in PGS | R in European | R in QGP | Performance QGP/European (%) |
|--------|-------------|--------------------------|-------------|------------|---------------|---------------------------|---------------|----------|------------------------------|
| Height | EFO_0004339 | PGS000297                | 456,426     | European   | PMID:30124842 | 3,290                     | 0.37          | 0.15     | 40.54%                       |
| BMI    | EFO_0004340 | PGS000027                | 288,016     | European   | PMID:31002795 | 2,100,302                 | 0.29          | 0.22     | 75.86%                       |
| WBC    | EFO_0004308 | PGS000191                | 408,112     | European   | PMID:32888494 | 636                       | 0.29          | 0.19     | 65.52%                       |
| RBC    | EFO_0004305 | PGS000187                | 408,112     | European   | PMID:32888494 | 678                       | 0.34          | 0.22     | 64.71%                       |
| MCHC   | EFO_0004528 | PGS000175                | 408,112     | European   | PMID:32888494 | 224                       | 0.23          | 0.12     | 52.17%                       |
| MCH    | EFO_0004527 | PGS000174                | 408,112     | European   | PMID:32888494 | 628                       | 0.43          | 0.22     | 51.16%                       |
| MCV    | EFO_0004526 | PGS000176                | 408,112     | European   | PMID:32888494 | 685                       | 0.4           | 0.23     | 57.50%                       |
| Plt    | EFO_0004309 | PGS000186                | 408,112     | European   | PMID:32888494 | 739                       | 0.44          | 0.35     | 79.55%                       |
| MPV    | EFO_0004584 | PGS000179                | 408,112     | European   | PMID:32888494 | 654                       | 0.52          | 0.51     | 98.08%                       |
| Ht     | EFO_0004348 | PGS000167                | 408,112     | European   | PMID:32888494 | 502                       | 0.22          | 0.15     | 68.18%                       |
| Hb     | EFO_0004509 | PGS000168                | 408,112     | European   | PMID:32888494 | 515                       | 0.24          | 0.14     | 58.33%                       |

R is Pearson's correlation between the trait values and PGS.
