# Supplementary material for: Whole genome sequencing in the Middle Eastern Qatari population identifies genetic associations with 45 clinically relevant traits
Source: PubMed Central journal article supplement (PMC7902658; doi:10.1038/s41467-021-21381-3), 2021-02-23
Supplement: 41467_2021_21381_MOESM2_ESM.pdf [file 41467_2021_21381_MOESM2_ESM.pdf]

## **Descriptions of Additional Supplementary Files**

### **Supplementary Data 1**

**Description:** Summary of experimental methods for studied traits.

### **Supplementary Data 2**

**Description:** Manhattan and quantile-quantile plots for the 45 clinically- relevant traits analyzed in this study.

### **Supplementary Data 3**

**Description:** List of genome-wide significant distinct signals associated with traits.

### **Supplementary Data 4**

**Description:** Replication of loci identified by Biobank Japan Project.

### **Supplementary Data 5**

**Description:** Colocalization analysis of known loci showing nominal significance for replication.

### **Supplementary Data 6**

**Description:** Regional association plots for the novel loci identified in this study
